# Supplementary material for: High Expression of PLAGL2 is Associated With Poor Prognosis in High-Grade Glioma
Source: Front Genet. 2022 Feb 9;12:787746. doi: 10.3389/fgene.2021.787746 (PMC8863765; doi:10.3389/fgene.2021.787746)
Supplement: Supplementary file 1 [file Table2.XLS]

## Sheet: genede
Tumor	Nor	p value
BLCA.Tumor (n=408)	BLCA.Normal (n=19)	0.00722538
BRCA.Tumor (n=1093)	BRCA.Normal (n=112)	0.0001312
CESC.Tumor (n=304)	CESC.Normal (n=3)	0.0201481
CHOL.Tumor (n=36)	CHOL.Normal (n=9)	4.51384e-09
COAD.Tumor (n=457)	COAD.Normal (n=41)	2.65415e-09
ESCA.Tumor (n=184)	ESCA.Normal (n=11)	5.10643e-05
GBM.Tumor (n=153)	GBM.Normal (n=5)	0.016231
HNSC-HPV+.Tumor (n=97)	HNSC-HPV-.Tumor (n=421)	0.0005213
HNSC.Tumor (n=520)	HNSC.Normal (n=44)	6.4679e-06
KICH.Tumor (n=66)	KICH.Normal (n=25)	8.76569e-10
KIRC.Tumor (n=533)	KIRC.Normal (n=72)	0.975072
KIRP.Tumor (n=290)	KIRP.Normal (n=32)	8.26167e-05
LIHC.Tumor (n=371)	LIHC.Normal (n=50)	2.25502e-10
LUAD.Tumor (n=515)	LUAD.Normal (n=59)	0.906318
LUSC.Tumor (n=501)	LUSC.Normal (n=51)	1.56863e-09
PAAD.Tumor (n=178)	PAAD.Normal (n=4)	0.784463
PCPG.Tumor (n=179)	PCPG.Normal (n=3)	0.0185859
PRAD.Tumor (n=497)	PRAD.Normal (n=52)	0.781057
READ.Tumor (n=166)	READ.Normal (n=10)	8.79952e-06
SKCM.Tumor (n=103)	SKCM.Metastasis (n=368)	2.62875e-05
STAD.Tumor (n=415)	STAD.Normal (n=35)	1.48869e-08
THCA.Tumor (n=501)	THCA.Normal (n=59)	2.21836e-08
UCEC.Tumor (n=545)	UCEC.Normal (n=35)	0.00455985
