# Supplementary material for: High Expression of PLAGL2 is Associated With Poor Prognosis in High-Grade Glioma
Source: Front Genet. 2022 Feb 9;12:787746. doi: 10.3389/fgene.2021.787746 (PMC8863765; doi:10.3389/fgene.2021.787746)
Supplement: Supplementary file 4 [file Table3.XLS]

## Sheet: gene_expression.GPL570
Index	Tissue	Dataset_ID	Sample_ID	T:Tissue;C:Cellline	Cellline_name	Expression_level
1	Adipose-Cancer	GSE2109	GSM137902	T	None	8.53528
2	Adipose-Cancer	GSE66162	GSM1615580	T	None	6.72792
3	Adipose-Cancer	GSE66162	GSM1615582	T	None	6.58496
4	Adipose-Cancer	GSE66162	GSM1615585	T	None	6.44294
5	Adipose-Cancer	GSE66162	GSM1615587	T	None	6.50779
6	Adipose-Cancer	GSE66162	GSM1615602	T	None	6.52356
7	Adipose-Cancer	GSE66162	GSM1615604	T	None	6.49185
8	Adipose-Cancer	GSE66162	GSM1615609	T	None	6.10852
9	Adipose-Cancer	GSE66162	GSM1615613	T	None	6.16993
10	Adipose-Cancer	GSE13506	GSM340488	T	None	6.78136
11	Adipose-Normal	GSE41168	GSM1009760	T	None	5.20945
12	Adipose-Normal	GSE41168	GSM1009772	T	None	5.9542
13	Adipose-Normal	GSE41168	GSM1009776	T	None	6.76818
14	Adipose-Normal	GSE41168	GSM1009800	T	None	6.96578
15	Adipose-Normal	GSE41168	GSM1009804	T	None	5.85798
16	Adipose-Normal	GSE41168	GSM1009812	T	None	6.18982
17	Adipose-Normal	GSE41168	GSM1009820	T	None	6.2854
18	Adipose-Normal	GSE41168	GSM1009828	T	None	6.33985
19	Adipose-Normal	GSE41168	GSM1009836	T	None	6.02237
20	Adipose-Normal	GSE41168	GSM1009844	T	None	6.59991
21	Adipose-Normal	GSE41168	GSM1009854	T	None	6.08746
22	Adipose-Normal	GSE41168	GSM1009872	T	None	5.67243
23	Adipose-Normal	GSE41168	GSM1009886	T	None	6.30378
24	Adipose-Normal	GSE43346	GSM1060754	T	None	5.93074
25	Adipose-Normal	GSE7307	GSM175834	T	None	7.8009
26	Adipose-Normal	GSE7307	GSM175835	T	None	7.67243
27	Adipose-Normal	GSE7307	GSM175836	T	None	7.65821
28	Adipose-Normal	GSE7307	GSM175837	T	None	6.80736
29	Adipose-Normal	GSE7307	GSM175994	T	None	7.77479
30	Adipose-Normal	GSE7307	GSM176027	T	None	7.63663
31	Adipose-Normal	GSE7307	GSM176028	T	None	7.6865
32	Adipose-Normal	GSE7307	GSM176118	T	None	7.45121
33	Adipose-Normal	GSE7307	GSM176119	T	None	7.93074
34	Adipose-Normal	GSE7307	GSM176121	T	None	7.48382
35	Adipose-Normal	GSE13506	GSM340489	T	None	6.53916
36	Adipose-Normal	GSE13506	GSM340490	T	None	6.76818
37	Adipose-Normal	GSE13506	GSM340491	T	None	6.35755
38	Adipose-Normal	GSE13506	GSM340492	T	None	5.9542
39	Adipose-Normal	GSE13506	GSM340493	T	None	6.65821
40	Adipose-Normal	GSE13506	GSM340494	T	None	6.56986
41	Adipose-Normal	GSE13506	GSM340495	T	None	6.26679
42	Adipose-Normal	GSE13506	GSM340496	T	None	6.53916
43	Adipose-Normal	GSE13506	GSM340497	T	None	6.71425
44	Adipose-Normal	GSE13506	GSM340498	T	None	6.64386
45	Adipose-Normal	GSE13506	GSM340499	T	None	7.06609
46	Adipose-Normal	GSE13506	GSM340500	T	None	6.58496
47	Adipose-Normal	GSE13506	GSM340501	T	None	5.78136
48	Adipose-Normal	GSE13506	GSM340502	T	None	6.35755
49	Adipose-Normal	GSE13506	GSM340503	T	None	6.44294
50	Adipose-Normal	GSE13506	GSM340504	T	None	6.67243
51	Adipose-Normal	GSE13506	GSM340505	T	None	6.6865
52	Adipose-Normal	GSE13506	GSM340506	T	None	6.39232
53	Adipose-Normal	GSE13506	GSM340507	T	None	6.08746
54	Adipose-Normal	GSE13506	GSM340508	T	None	6.33985
55	Adipose-Normal	GSE13506	GSM340509	T	None	6.40939
56	Adipose-Normal	GSE13506	GSM340510	T	None	6.9542
57	Adipose-Normal	GSE13506	GSM340511	T	None	6.42626
58	Adipose-Normal	GSE13506	GSM340512	T	None	6.33985
59	Adipose-Normal	GSE13506	GSM340513	T	None	6.30378
60	Adipose-Normal	GSE13506	GSM340514	T	None	6.22882
61	Adipose-Normal	GSE13506	GSM340515	T	None	6.2854
62	Adipose-Normal	GSE13506	GSM340516	T	None	6.02237
63	Adipose-Normal	GSE13506	GSM340517	T	None	7.6865
64	Adipose-Normal	GSE13506	GSM340518	T	None	6.74147
65	Adipose-Normal	GSE13506	GSM340519	T	None	6.04439
66	Adipose-Normal	GSE13506	GSM340520	T	None	6.72792
67	Adipose-Normal	GSE13506	GSM340521	T	None	6.52356
68	Adipose-Normal	GSE13506	GSM340522	T	None	6.26679
69	Adipose-Normal	GSE13506	GSM340523	T	None	6.67243
70	Adipose-Normal	GSE13506	GSM340524	T	None	6.40939
71	Adipose-Normal	GSE13506	GSM340525	T	None	6.30378
72	Adipose-Normal	GSE13506	GSM340526	T	None	6.56986
73	Adipose-Normal	GSE13506	GSM340527	T	None	7.27612
74	Adipose-Normal	GSE13506	GSM340528	T	None	6.40939
75	Adipose-Normal	GSE13506	GSM340529	T	None	6.58496
76	Adipose-Normal	GSE13506	GSM340530	T	None	6.45943
77	Adipose-Normal	GSE13506	GSM340531	T	None	6.32193
78	Adipose-Normal	GSE13506	GSM340532	T	None	6.72792
79	Adipose-Normal	GSE13506	GSM340533	T	None	6.71425
80	Adipose-Normal	GSE13506	GSM340534	T	None	6.39232
81	Adipose-Normal	GSE13506	GSM340535	T	None	7.05528
82	Adipose-Normal	GSE13506	GSM340536	T	None	6.80736
83	Adrenal_Gland-Cancer	GSE19776	GSM1094056	T	None	7.33092
84	Adrenal_Gland-Cancer	GSE19776	GSM1094057	T	None	8.21432
85	Adrenal_Gland-Cancer	GSE19776	GSM1094058	T	None	7.6865
86	Adrenal_Gland-Cancer	GSE19776	GSM1094059	T	None	7.09803
87	Adrenal_Gland-Cancer	GSE19776	GSM1094060	T	None	8.45533
88	Adrenal_Gland-Cancer	GSE19776	GSM1094061	T	None	7.48382
89	Adrenal_Gland-Cancer	GSE19776	GSM1094062	T	None	7.02237
90	Adrenal_Gland-Cancer	GSE19776	GSM1094063	T	None	7.97728
91	Adrenal_Gland-Cancer	GSE19776	GSM1094064	T	None	7.07682
92	Adrenal_Gland-Cancer	GSE19776	GSM1094065	T	None	7.12928
93	Adrenal_Gland-Cancer	GSE19776	GSM1094066	T	None	7.35755
94	Adrenal_Gland-Cancer	GSE19776	GSM1094067	T	None	7.16993
95	Adrenal_Gland-Cancer	GSE19776	GSM1094068	T	None	7.19967
96	Adrenal_Gland-Cancer	GSE19776	GSM1094069	T	None	7.30378
97	Adrenal_Gland-Cancer	GSE19776	GSM1094070	T	None	8.34873
98	Adrenal_Gland-Cancer	GSE19776	GSM1094071	T	None	7.02237
99	Adrenal_Gland-Cancer	GSE19776	GSM1094072	T	None	6.04439
100	Adrenal_Gland-Cancer	GSE19776	GSM1094073	T	None	6.97728
101	Adrenal_Gland-Cancer	GSE19776	GSM1094074	T	None	6.20945
102	Adrenal_Gland-Cancer	GSE19776	GSM1094075	T	None	7.15987
103	Adrenal_Gland-Cancer	GSE19776	GSM1094076	T	None	6.59991
104	Adrenal_Gland-Cancer	GSE19776	GSM1094077	T	None	7.26679
105	Adrenal_Gland-Cancer	GSE19776	GSM1094078	T	None	10.2877
106	Adrenal_Gland-Cancer	GSE19776	GSM1094079	T	None	7.27612
107	Adrenal_Gland-Cancer	GSE19776	GSM1094080	T	None	7.63663
108	Adrenal_Gland-Cancer	GSE2109	GSM117754	T	None	7.59246
109	Adrenal_Gland-Cancer	GSE2109	GSM203678	T	None	7.30378
110	Adrenal_Gland-Cancer	GSE8514	GSM211446	T	None	6.89482
111	Adrenal_Gland-Cancer	GSE8514	GSM211451	T	None	7.06609
112	Adrenal_Gland-Cancer	GSE8514	GSM211452	T	None	7.24793
113	Adrenal_Gland-Cancer	GSE8514	GSM211453	T	None	7.36632
114	Adrenal_Gland-Cancer	GSE8514	GSM211454	T	None	7.26679
115	Adrenal_Gland-Cancer	GSE8514	GSM211455	T	None	7.62205
116	Adrenal_Gland-Cancer	GSE8514	GSM211456	T	None	6.61471
117	Adrenal_Gland-Cancer	GSE8514	GSM211457	T	None	7.03342
118	Adrenal_Gland-Cancer	GSE8514	GSM211458	T	None	6.02237
119	Adrenal_Gland-Cancer	GSE8514	GSM211459	T	None	7.43463
120	Adrenal_Gland-Cancer	GSE8514	GSM211460	T	None	7.01123
121	Adrenal_Gland-Cancer	GSE2109	GSM38072	T	None	6.98868
122	Adrenal_Gland-Cancer	GSE2109	GSM46946	T	None	8.7039
123	Adrenal_Gland-Cancer	GSE19776	GSM493255	T	None	7.26679
124	Adrenal_Gland-Cancer	GSE19776	GSM493256	T	None	6.88264
125	Adrenal_Gland-Cancer	GSE19776	GSM493257	T	None	7.97728
126	Adrenal_Gland-Cancer	GSE19776	GSM493258	T	None	6.33985
127	Adrenal_Gland-Cancer	GSE19776	GSM493259	T	None	6.65821
128	Adrenal_Gland-Cancer	GSE19776	GSM493260	T	None	8.12928
129	Adrenal_Gland-Cancer	GSE19776	GSM493261	T	None	6.91886
130	Adrenal_Gland-Cancer	GSE19776	GSM493262	T	None	7.94837
131	Adrenal_Gland-Cancer	GSE19776	GSM493263	T	None	6.74147
132	Adrenal_Gland-Cancer	GSE19776	GSM493264	T	None	6.80736
133	Adrenal_Gland-Cancer	GSE19776	GSM493265	T	None	6.45943
134	Adrenal_Gland-Cancer	GSE19776	GSM493266	T	None	7.10852
135	Adrenal_Gland-Cancer	GSE19776	GSM493267	T	None	6.93074
136	Adrenal_Gland-Cancer	GSE19776	GSM493268	T	None	7.21917
137	Adrenal_Gland-Cancer	GSE19776	GSM493269	T	None	7.17991
138	Adrenal_Gland-Cancer	GSE19776	GSM493270	T	None	6.26679
139	Adrenal_Gland-Cancer	GSE19776	GSM493271	T	None	6.02237
140	Adrenal_Gland-Cancer	GSE19776	GSM493272	T	None	6.9542
141	Adrenal_Gland-Cancer	GSE19776	GSM493273	T	None	6.93074
142	Adrenal_Gland-Cancer	GSE33371	GSM825377	T	None	6.16993
143	Adrenal_Gland-Cancer	GSE33371	GSM825378	T	None	7.01123
144	Adrenal_Gland-Cancer	GSE33371	GSM825379	T	None	6.9542
145	Adrenal_Gland-Cancer	GSE33371	GSM825380	T	None	6.55459
146	Adrenal_Gland-Cancer	GSE33371	GSM825381	T	None	6.67243
147	Adrenal_Gland-Cancer	GSE33371	GSM825382	T	None	6.75489
148	Adrenal_Gland-Cancer	GSE33371	GSM825383	T	None	7.18982
149	Adrenal_Gland-Cancer	GSE33371	GSM825384	T	None	6.72792
150	Adrenal_Gland-Cancer	GSE33371	GSM825385	T	None	7.03342
151	Adrenal_Gland-Cancer	GSE33371	GSM825386	T	None	7.2384
152	Adrenal_Gland-Cancer	GSE33371	GSM825387	T	None	6.90689
153	Adrenal_Gland-Cancer	GSE33371	GSM825388	T	None	6.83289
154	Adrenal_Gland-Cancer	GSE33371	GSM825389	T	None	6.80736
155	Adrenal_Gland-Cancer	GSE33371	GSM825390	T	None	6.85798
156	Adrenal_Gland-Cancer	GSE33371	GSM825391	T	None	7.09803
157	Adrenal_Gland-Cancer	GSE33371	GSM825392	T	None	6.75489
158	Adrenal_Gland-Cancer	GSE33371	GSM825393	T	None	7.5157
159	Adrenal_Gland-Cancer	GSE33371	GSM825394	T	None	7.22882
160	Adrenal_Gland-Cancer	GSE33371	GSM825395	T	None	7.25739
161	Adrenal_Gland-Cancer	GSE33371	GSM825396	T	None	6.72792
162	Adrenal_Gland-Cancer	GSE33371	GSM825397	T	None	6.64386
163	Adrenal_Gland-Cancer	GSE33371	GSM825398	T	None	7.14975
164	Adrenal_Gland-Cancer	GSE33371	GSM825399	T	None	7.35755
165	Adrenal_Gland-Cancer	GSE33371	GSM825400	T	None	7.53138
166	Adrenal_Gland-Cancer	GSE33371	GSM825401	T	None	7.56224
167	Adrenal_Gland-Cancer	GSE33371	GSM825402	T	None	7.9542
168	Adrenal_Gland-Cancer	GSE33371	GSM825403	T	None	7.65821
169	Adrenal_Gland-Cancer	GSE33371	GSM825404	T	None	7.34873
170	Adrenal_Gland-Cancer	GSE33371	GSM825405	T	None	6.85798
171	Adrenal_Gland-Cancer	GSE33371	GSM825406	T	None	7.36632
172	Adrenal_Gland-Cancer	GSE33371	GSM825407	T	None	8.05528
173	Adrenal_Gland-Cancer	GSE33371	GSM825408	T	None	7.30378
174	Adrenal_Gland-Cancer	GSE33371	GSM825409	T	None	7.11894
175	Adrenal_Gland-Cancer	GSE33371	GSM825410	T	None	7.39232
176	Adrenal_Gland-Cancer	GSE33371	GSM825411	T	None	7.67948
177	Adrenal_Gland-Cancer	GSE33371	GSM825412	T	None	7.49985
178	Adrenal_Gland-Cancer	GSE33371	GSM825413	T	None	6.45943
179	Adrenal_Gland-Cancer	GSE33371	GSM825414	T	None	7.85798
180	Adrenal_Gland-Cancer	GSE33371	GSM825415	T	None	7.25739
181	Adrenal_Gland-Cancer	GSE33371	GSM825416	T	None	8.66888
182	Adrenal_Gland-Cancer	GSE33371	GSM825417	T	None	7.47573
183	Adrenal_Gland-Cancer	GSE33371	GSM825418	T	None	7.70736
184	Adrenal_Gland-Cancer	GSE33371	GSM825419	T	None	7.93664
185	Adrenal_Gland-Cancer	GSE33371	GSM825420	T	None	7.35755
186	Adrenal_Gland-Cancer	GSE33371	GSM825421	T	None	7.53138
187	Adrenal_Gland-Cancer	GSE33371	GSM825422	T	None	7.07682
188	Adrenal_Gland-Cancer	GSE33371	GSM825423	T	None	6.76818
189	Adrenal_Gland-Cancer	GSE33371	GSM825424	T	None	7.2854
190	Adrenal_Gland-Cancer	GSE33371	GSM825425	T	None	7.47573
191	Adrenal_Gland-Cancer	GSE33371	GSM825426	T	None	6.91886
192	Adrenal_Gland-Cancer	GSE33371	GSM825427	T	None	7.19967
193	Adrenal_Gland-Cancer	GSE33371	GSM825428	T	None	7.47573
194	Adrenal_Gland-Cancer	GSE33371	GSM825429	T	None	7.22882
195	Adrenal_Gland-Cancer	GSE33371	GSM825430	T	None	6.90689
196	Adrenal_Gland-Cancer	GSE33371	GSM825431	T	None	7.44294
197	Adrenal_Gland-Normal	GSE43346	GSM1060745	T	None	7.45121
198	Adrenal_Gland-Normal	GSE8514	GSM211447	T	None	7.40088
199	Adrenal_Gland-Normal	GSE8514	GSM211448	T	None	7.22882
200	Adrenal_Gland-Normal	GSE8514	GSM211449	T	None	6.33985
201	Adrenal_Gland-Normal	GSE8514	GSM211450	T	None	6.67243
202	Adrenal_Gland-Normal	GSE19776	GSM493251	T	None	7.03342
203	Adrenal_Gland-Normal	GSE19776	GSM493252	T	None	6.82018
204	Adrenal_Gland-Normal	GSE19776	GSM493253	T	None	5.83289
205	Adrenal_Gland-Normal	GSE19776	GSM493254	T	None	6.64386
206	Adrenal_Gland-Normal	GSE33371	GSM825367	T	None	6.65821
207	Adrenal_Gland-Normal	GSE33371	GSM825368	T	None	6.55459
208	Adrenal_Gland-Normal	GSE33371	GSM825369	T	None	7.50779
209	Adrenal_Gland-Normal	GSE33371	GSM825370	T	None	7.22882
210	Adrenal_Gland-Normal	GSE33371	GSM825371	T	None	6.9542
211	Adrenal_Gland-Normal	GSE33371	GSM825372	T	None	7.20945
212	Adrenal_Gland-Normal	GSE33371	GSM825373	T	None	6.87036
213	Adrenal_Gland-Normal	GSE33371	GSM825374	T	None	7.11894
214	Adrenal_Gland-Normal	GSE33371	GSM825375	T	None	7.06609
215	Adrenal_Gland-Normal	GSE33371	GSM825376	T	None	7.37504
246	Bladder-Cancer	GSE2109	GSM102434	T	None	7.77479
247	Bladder-Cancer	GSE2109	GSM102437	T	None	7.54689
248	Bladder-Cancer	GSE2109	GSM102470	T	None	9.40301
249	Bladder-Cancer	GSE2109	GSM102475	T	None	7.11894
253	Bladder-Cancer	GSE2109	GSM117677	T	None	7.16993
254	Bladder-Cancer	GSE2109	GSM137919	T	None	8
255	Bladder-Cancer	GSE2109	GSM137976	T	None	8.56224
256	Bladder-Cancer	GSE2109	GSM152625	T	None	7.50779
257	Bladder-Cancer	GSE2109	GSM152717	T	None	7.87652
258	Bladder-Cancer	GSE2109	GSM152732	T	None	7.90689
259	Bladder-Cancer	GSE2109	GSM152779	T	None	7.48382
260	Bladder-Cancer	GSE2109	GSM152797	T	None	7.55459
261	Bladder-Cancer	GSE2109	GSM179874	T	None	7.43463
262	Bladder-Cancer	GSE2109	GSM179921	T	None	7.67948
263	Bladder-Cancer	GSE2109	GSM179926	T	None	7.57743
264	Bladder-Cancer	GSE7476	GSM180995	T	None	7.50779
265	Bladder-Cancer	GSE7476	GSM180996	T	None	7.82018
266	Bladder-Cancer	GSE7476	GSM180997	T	None	7.76155
267	Bladder-Cancer	GSE7476	GSM180998	T	None	8.19476
268	Bladder-Cancer	GSE7476	GSM180999	T	None	7.99435
269	Bladder-Cancer	GSE7476	GSM181000	T	None	8.30834
270	Bladder-Cancer	GSE7476	GSM181001	T	None	7.85798
271	Bladder-Cancer	GSE7476	GSM181002	T	None	8.30834
272	Bladder-Cancer	GSE2109	GSM203714	T	None	7.92481
273	Bladder-Cancer	GSE2109	GSM203738	T	None	8.29921
274	Bladder-Cancer	GSE2109	GSM203753	T	None	7.21917
275	Bladder-Cancer	GSE2109	GSM203793	T	None	7.60733
276	Bladder-Cancer	GSE2109	GSM231906	T	None	7.49185
277	Bladder-Cancer	GSE2109	GSM46920	T	None	8.67596
278	Bladder-Cancer	GSE2109	GSM53030	T	None	8.03892
279	Bladder-Cancer	GSE2109	GSM53097	T	None	7.78136
280	Bladder-Cancer	GSE2109	GSM53117	T	None	7.8392
281	Bladder-Cancer	GSE2109	GSM53137	T	None	8.11374
282	Bladder-Cancer	GSE2109	GSM53139	T	None	7.65105
283	Bladder-Cancer	GSE30522	GSM756939	T	None	7.61471
284	Bladder-Cancer	GSE30522	GSM756940	T	None	7.52356
285	Bladder-Cancer	GSE2109	GSM76532	T	None	7.62936
286	Bladder-Cancer	GSE31189	GSM773124	T	None	8.683
287	Bladder-Cancer	GSE31189	GSM773125	T	None	8.54303
288	Bladder-Cancer	GSE31189	GSM773126	T	None	8.10852
289	Bladder-Cancer	GSE31189	GSM773127	T	None	8.24317
290	Bladder-Cancer	GSE31189	GSM773128	T	None	7.29462
291	Bladder-Cancer	GSE31189	GSM773129	T	None	8.53528
292	Bladder-Cancer	GSE31189	GSM773130	T	None	9.46353
293	Bladder-Cancer	GSE31189	GSM773131	T	None	8.03892
294	Bladder-Cancer	GSE31189	GSM773132	T	None	7.53916
295	Bladder-Cancer	GSE31189	GSM773133	T	None	8.99152
296	Bladder-Cancer	GSE31189	GSM773134	T	None	7.79442
297	Bladder-Cancer	GSE31189	GSM773135	T	None	7.78136
298	Bladder-Cancer	GSE31189	GSM773136	T	None	7.87036
299	Bladder-Cancer	GSE31189	GSM773137	T	None	7.59246
300	Bladder-Cancer	GSE31189	GSM773138	T	None	8.48784
301	Bladder-Cancer	GSE31189	GSM773139	T	None	8.10852
302	Bladder-Cancer	GSE31189	GSM773140	T	None	8.66178
303	Bladder-Cancer	GSE31189	GSM773141	T	None	7.53916
304	Bladder-Cancer	GSE31189	GSM773142	T	None	7.90087
305	Bladder-Cancer	GSE31189	GSM773143	T	None	8.7211
306	Bladder-Cancer	GSE31189	GSM773144	T	None	7.94837
307	Bladder-Cancer	GSE31189	GSM773145	T	None	7.96
308	Bladder-Cancer	GSE31189	GSM773146	T	None	8.43463
309	Bladder-Cancer	GSE31189	GSM773147	T	None	7.32193
310	Bladder-Cancer	GSE31189	GSM773148	T	None	7.57743
311	Bladder-Cancer	GSE31189	GSM773149	T	None	8.42206
312	Bladder-Cancer	GSE31189	GSM773150	T	None	7.40939
313	Bladder-Cancer	GSE31189	GSM773151	T	None	8.33985
314	Bladder-Cancer	GSE31189	GSM773152	T	None	8.13955
315	Bladder-Cancer	GSE31189	GSM773153	T	None	7.97728
316	Bladder-Cancer	GSE31189	GSM773154	T	None	7.40088
317	Bladder-Cancer	GSE31189	GSM773155	T	None	8.29921
318	Bladder-Cancer	GSE31189	GSM773156	T	None	7.25739
319	Bladder-Cancer	GSE31189	GSM773157	T	None	8.47167
320	Bladder-Cancer	GSE31189	GSM773158	T	None	7.87652
321	Bladder-Cancer	GSE31189	GSM773159	T	None	8.16491
322	Bladder-Cancer	GSE31189	GSM773160	T	None	7.89482
323	Bladder-Cancer	GSE31189	GSM773161	T	None	7.44294
324	Bladder-Cancer	GSE31189	GSM773162	T	None	8.14975
325	Bladder-Cancer	GSE31189	GSM773163	T	None	8.3443
326	Bladder-Cancer	GSE31189	GSM773164	T	None	8.55459
327	Bladder-Cancer	GSE31189	GSM773165	T	None	7.54689
328	Bladder-Cancer	GSE31189	GSM773166	T	None	7.90087
329	Bladder-Cancer	GSE31189	GSM773167	T	None	7.70044
330	Bladder-Cancer	GSE31189	GSM773168	T	None	8.09276
331	Bladder-Cancer	GSE31189	GSM773169	T	None	8.55842
332	Bladder-Cancer	GSE31189	GSM773170	T	None	8.15987
333	Bladder-Cancer	GSE31189	GSM773171	T	None	7.93664
334	Bladder-Cancer	GSE31189	GSM773172	T	None	8.30378
335	Bladder-Cancer	GSE31189	GSM773173	T	None	7.42626
336	Bladder-Cancer	GSE31189	GSM773174	T	None	8.19967
337	Bladder-Cancer	GSE31189	GSM773175	T	None	7.97728
338	Bladder-Cancer	GSE31684	GSM786491	T	None	7.8392
339	Bladder-Cancer	GSE31684	GSM786492	T	None	8.29921
340	Bladder-Cancer	GSE31684	GSM786493	T	None	8.50383
341	Bladder-Cancer	GSE31684	GSM786494	T	None	8.11894
342	Bladder-Cancer	GSE31684	GSM786495	T	None	8.43879
343	Bladder-Cancer	GSE31684	GSM786496	T	None	8.44294
344	Bladder-Cancer	GSE31684	GSM786497	T	None	8.19967
345	Bladder-Cancer	GSE31684	GSM786498	T	None	7.22882
346	Bladder-Cancer	GSE31684	GSM786499	T	None	8.35755
347	Bladder-Cancer	GSE31684	GSM786500	T	None	8.21917
348	Bladder-Cancer	GSE31684	GSM786501	T	None	7.73471
349	Bladder-Cancer	GSE31684	GSM786502	T	None	7.87036
350	Bladder-Cancer	GSE31684	GSM786503	T	None	8.35755
351	Bladder-Cancer	GSE31684	GSM786504	T	None	7.72792
352	Bladder-Cancer	GSE31684	GSM786505	T	None	8.18982
353	Bladder-Cancer	GSE31684	GSM786506	T	None	8.87958
354	Bladder-Cancer	GSE31684	GSM786507	T	None	7.48382
355	Bladder-Cancer	GSE31684	GSM786508	T	None	8.39232
356	Bladder-Cancer	GSE31684	GSM786509	T	None	8.61471
357	Bladder-Cancer	GSE31684	GSM786510	T	None	8.26209
358	Bladder-Cancer	GSE31684	GSM786511	T	None	8.29002
359	Bladder-Cancer	GSE31684	GSM786512	T	None	8.36632
360	Bladder-Cancer	GSE31684	GSM786513	T	None	7.11894
361	Bladder-Cancer	GSE31684	GSM786514	T	None	7.88264
362	Bladder-Cancer	GSE31684	GSM786515	T	None	8.40939
363	Bladder-Cancer	GSE31684	GSM786516	T	None	8.06609
364	Bladder-Cancer	GSE31684	GSM786517	T	None	8.88264
365	Bladder-Cancer	GSE31684	GSM786518	T	None	8.22882
366	Bladder-Cancer	GSE31684	GSM786519	T	None	8.26209
367	Bladder-Cancer	GSE31684	GSM786520	T	None	7.96578
368	Bladder-Cancer	GSE31684	GSM786521	T	None	8.62571
369	Bladder-Cancer	GSE31684	GSM786522	T	None	8.53138
370	Bladder-Cancer	GSE31684	GSM786523	T	None	8.02791
371	Bladder-Cancer	GSE31684	GSM786524	T	None	7.99435
372	Bladder-Cancer	GSE31684	GSM786525	T	None	7.64386
373	Bladder-Cancer	GSE31684	GSM786526	T	None	7.39232
374	Bladder-Cancer	GSE31684	GSM786527	T	None	8.23362
375	Bladder-Cancer	GSE31684	GSM786528	T	None	7.83289
376	Bladder-Cancer	GSE31684	GSM786529	T	None	7.9542
377	Bladder-Cancer	GSE31684	GSM786530	T	None	7.91886
378	Bladder-Cancer	GSE31684	GSM786531	T	None	7.55459
379	Bladder-Cancer	GSE31684	GSM786532	T	None	7.88264
380	Bladder-Cancer	GSE31684	GSM786533	T	None	8.46761
381	Bladder-Cancer	GSE31684	GSM786534	T	None	8.37938
382	Bladder-Cancer	GSE31684	GSM786535	T	None	8.40514
383	Bladder-Cancer	GSE31684	GSM786536	T	None	7.59991
384	Bladder-Cancer	GSE31684	GSM786537	T	None	8
385	Bladder-Cancer	GSE31684	GSM786538	T	None	7.41785
386	Bladder-Cancer	GSE31684	GSM786539	T	None	8.35315
387	Bladder-Cancer	GSE31684	GSM786540	T	None	7.82018
388	Bladder-Cancer	GSE31684	GSM786541	T	None	8.10329
389	Bladder-Cancer	GSE31684	GSM786542	T	None	8.20945
390	Bladder-Cancer	GSE31684	GSM786543	T	None	8.50383
391	Bladder-Cancer	GSE31684	GSM786544	T	None	8.10329
392	Bladder-Cancer	GSE31684	GSM786545	T	None	8.08746
393	Bladder-Cancer	GSE31684	GSM786546	T	None	7.70736
394	Bladder-Cancer	GSE31684	GSM786547	T	None	8.04439
395	Bladder-Cancer	GSE31684	GSM786548	T	None	8.36194
396	Bladder-Cancer	GSE31684	GSM786549	T	None	8.85487
397	Bladder-Cancer	GSE31684	GSM786550	T	None	8.36632
398	Bladder-Cancer	GSE31684	GSM786551	T	None	7.79442
399	Bladder-Cancer	GSE31684	GSM786552	T	None	8.16992
400	Bladder-Cancer	GSE31684	GSM786553	T	None	8.42206
401	Bladder-Cancer	GSE31684	GSM786554	T	None	9.01123
402	Bladder-Cancer	GSE31684	GSM786555	T	None	8.32643
403	Bladder-Cancer	GSE31684	GSM786556	T	None	8.47978
404	Bladder-Cancer	GSE31684	GSM786557	T	None	7.83289
405	Bladder-Cancer	GSE31684	GSM786558	T	None	8.11894
406	Bladder-Cancer	GSE31684	GSM786559	T	None	8.53528
407	Bladder-Cancer	GSE31684	GSM786560	T	None	8.25267
408	Bladder-Cancer	GSE31684	GSM786561	T	None	7.86419
409	Bladder-Cancer	GSE31684	GSM786562	T	None	7.07682
410	Bladder-Cancer	GSE31684	GSM786563	T	None	8.5812
411	Bladder-Cancer	GSE31684	GSM786564	T	None	8.48784
412	Bladder-Cancer	GSE31684	GSM786565	T	None	7.92481
413	Bladder-Cancer	GSE31684	GSM786566	T	None	8.28077
414	Bladder-Cancer	GSE31684	GSM786567	T	None	7.88874
415	Bladder-Cancer	GSE31684	GSM786568	T	None	7.7211
416	Bladder-Cancer	GSE31684	GSM786569	T	None	8.03892
417	Bladder-Cancer	GSE31684	GSM786570	T	None	8.90989
418	Bladder-Cancer	GSE31684	GSM786571	T	None	7.67243
419	Bladder-Cancer	GSE31684	GSM786572	T	None	8.37069
420	Bladder-Cancer	GSE31684	GSM786573	T	None	8.50383
421	Bladder-Cancer	GSE31684	GSM786574	T	None	7.66534
422	Bladder-Cancer	GSE31684	GSM786575	T	None	7.70044
423	Bladder-Cancer	GSE31684	GSM786576	T	None	7.6865
424	Bladder-Cancer	GSE31684	GSM786577	T	None	7.40088
425	Bladder-Cancer	GSE31684	GSM786578	T	None	8.00563
426	Bladder-Cancer	GSE31684	GSM786579	T	None	8.04985
427	Bladder-Cancer	GSE31684	GSM786580	T	None	7.7879
428	Bladder-Cancer	GSE31684	GSM786581	T	None	8.24793
429	Bladder-Cancer	GSE31684	GSM786582	T	None	8.48382
430	Bladder-Cancer	GSE31684	GSM786583	T	None	7.93074
433	Bladder-Cancer	GSE2109	GSM88993	T	None	8.08746
434	Bladder-Cancer	GSE2109	GSM89048	T	None	7.52356
435	Bladder-Cancer	GSE2109	GSM89073	T	None	8.01123
436	Bladder-Normal	GSE43346	GSM1060746	T	None	7.47573
437	Bladder-Normal	GSE7307	GSM176279	T	None	7.09803
438	Bladder-Normal	GSE7307	GSM176280	T	None	7.71425
439	Bladder-Normal	GSE7307	GSM176428	T	None	7.67243
440	Bladder-Normal	GSE7307	GSM176429	T	None	7.34873
441	Bladder-Normal	GSE7307	GSM176430	T	None	7.36632
442	Bladder-Normal	GSE7476	GSM180991	T	None	7.33985
443	Bladder-Normal	GSE7476	GSM180992	T	None	7.31288
444	Bladder-Normal	GSE7476	GSM180993	T	None	7.65821
445	Bladder-Normal	GSE7476	GSM180994	T	None	7.49185
446	Bladder-Normal	GSE11783	GSM298203	T	None	7.67243
447	Bladder-Normal	GSE11783	GSM298204	T	None	7.50779
448	Bladder-Normal	GSE11783	GSM298212	T	None	7.13955
449	Bladder-Normal	GSE11783	GSM298215	T	None	7.42626
450	Bladder-Normal	GSE11783	GSM298216	T	None	7.49985
451	Bladder-Normal	GSE11783	GSM298217	T	None	7.15987
452	Bladder-Normal	GSE30522	GSM756935	T	None	7.13955
453	Bladder-Normal	GSE30522	GSM756936	T	None	6.47573
454	Bladder-Normal	GSE30522	GSM756937	T	None	7.93074
455	Bladder-Normal	GSE31189	GSM773176	T	None	7.14975
456	Bladder-Normal	GSE31189	GSM773177	T	None	8.64386
457	Bladder-Normal	GSE31189	GSM773178	T	None	9.59619
458	Bladder-Normal	GSE31189	GSM773179	T	None	7.56986
459	Bladder-Normal	GSE31189	GSM773180	T	None	8.25739
460	Bladder-Normal	GSE31189	GSM773181	T	None	8.24317
461	Bladder-Normal	GSE31189	GSM773182	T	None	9.04166
462	Bladder-Normal	GSE31189	GSM773183	T	None	7.14975
463	Bladder-Normal	GSE31189	GSM773184	T	None	8.91886
464	Bladder-Normal	GSE31189	GSM773185	T	None	8.82655
465	Bladder-Normal	GSE31189	GSM773186	T	None	8.91588
466	Bladder-Normal	GSE31189	GSM773187	T	None	6.67243
467	Bladder-Normal	GSE31189	GSM773188	T	None	8.71081
468	Bladder-Normal	GSE31189	GSM773189	T	None	7.59246
469	Bladder-Normal	GSE31189	GSM773190	T	None	8.86419
470	Bladder-Normal	GSE31189	GSM773191	T	None	7.94251
471	Bladder-Normal	GSE31189	GSM773192	T	None	7.87036
472	Bladder-Normal	GSE31189	GSM773193	T	None	8.56986
473	Bladder-Normal	GSE31189	GSM773194	T	None	7.57743
474	Bladder-Normal	GSE31189	GSM773195	T	None	7.63663
475	Bladder-Normal	GSE31189	GSM773196	T	None	8.224
476	Bladder-Normal	GSE31189	GSM773197	T	None	8.3837
477	Bladder-Normal	GSE31189	GSM773198	T	None	6.87036
478	Bladder-Normal	GSE31189	GSM773199	T	None	8.43879
479	Bladder-Normal	GSE31189	GSM773200	T	None	7.7879
480	Bladder-Normal	GSE31189	GSM773201	T	None	9.07146
481	Bladder-Normal	GSE31189	GSM773202	T	None	8.24793
482	Bladder-Normal	GSE31189	GSM773203	T	None	8.73132
483	Bladder-Normal	GSE31189	GSM773204	T	None	8.224
484	Bladder-Normal	GSE31189	GSM773205	T	None	8.49185
485	Bladder-Normal	GSE31189	GSM773206	T	None	8.09803
486	Bladder-Normal	GSE31189	GSM773207	T	None	8.52748
487	Bladder-Normal	GSE31189	GSM773208	T	None	7.71425
488	Bladder-Normal	GSE31189	GSM773209	T	None	8.12928
489	Bladder-Normal	GSE31189	GSM773210	T	None	8.20457
490	Bladder-Normal	GSE31189	GSM773211	T	None	8.15482
491	Bladder-Normal	GSE31189	GSM773212	T	None	7.49185
492	Bladder-Normal	GSE31189	GSM773213	T	None	7.93074
493	Bladder-Normal	GSE31189	GSM773214	T	None	8.23362
494	Bladder-Normal	GSE31189	GSM773215	T	None	7.74819
719	Blood-Cancer	GSE4588	GSM101869	T	None	7.30378
720	Blood-Cancer	GSE2109	GSM102457	T	None	7.25739
721	Blood-Cancer	GSE2109	GSM102466	T	None	8.11894
722	Blood-Cancer	GSE2109	GSM102514	T	None	7.72792
737	Blood-Cancer	GSE42040	GSM1030962	T	None	8.61102
738	Blood-Cancer	GSE42040	GSM1030963	T	None	8.633
739	Blood-Cancer	GSE42040	GSM1030964	T	None	8.47978
740	Blood-Cancer	GSE42040	GSM1030965	T	None	8.19967
741	Blood-Cancer	GSE42040	GSM1030966	T	None	8.36632
742	Blood-Cancer	GSE42040	GSM1030967	T	None	9.31515
743	Blood-Cancer	GSE42040	GSM1030968	T	None	8.61471
744	Blood-Cancer	GSE42040	GSM1030969	T	None	7.9542
745	Blood-Cancer	GSE42040	GSM1030970	T	None	8.75822
746	Blood-Cancer	GSE42040	GSM1030971	T	None	8.79116
747	Blood-Cancer	GSE42040	GSM1030972	T	None	8.50383
748	Blood-Cancer	GSE42040	GSM1030973	T	None	8.89785
749	Blood-Cancer	GSE42040	GSM1030974	T	None	8.3443
750	Blood-Cancer	GSE42040	GSM1030975	T	None	8.50383
751	Blood-Cancer	GSE42040	GSM1030976	T	None	8.12412
752	Blood-Cancer	GSE42040	GSM1030977	T	None	8.86419
753	Blood-Cancer	GSE42040	GSM1030978	T	None	9.32868
754	Blood-Cancer	GSE42040	GSM1030979	T	None	8.92481
755	Blood-Cancer	GSE42040	GSM1030980	T	None	8.92184
756	Blood-Cancer	GSE42040	GSM1030981	T	None	8.31288
757	Blood-Cancer	GSE42040	GSM1030982	T	None	8.15482
758	Blood-Cancer	GSE42040	GSM1030983	T	None	9.01959
759	Blood-Cancer	GSE42040	GSM1030984	T	None	8.94251
760	Blood-Cancer	GSE42040	GSM1030985	T	None	8.41785
761	Blood-Cancer	GSE42040	GSM1030986	T	None	8.633
762	Blood-Cancer	GSE42040	GSM1030987	T	None	8.49985
763	Blood-Cancer	GSE42040	GSM1030988	T	None	8.12412
764	Blood-Cancer	GSE42040	GSM1030989	T	None	7.84549
765	Blood-Cancer	GSE42040	GSM1030990	T	None	8.03892
766	Blood-Cancer	GSE42040	GSM1030991	T	None	8.82018
767	Blood-Cancer	GSE42040	GSM1030992	T	None	8.11374
768	Blood-Cancer	GSE42040	GSM1030993	T	None	8.12412
769	Blood-Cancer	GSE42040	GSM1030994	T	None	9.44501
770	Blood-Cancer	GSE42040	GSM1030995	T	None	8.07682
771	Blood-Cancer	GSE42040	GSM1030996	T	None	9.33762
772	Blood-Cancer	GSE42040	GSM1030997	T	None	8.07682
773	Blood-Cancer	GSE42040	GSM1030998	T	None	8.90689
774	Blood-Cancer	GSE42040	GSM1030999	T	None	8.49185
775	Blood-Cancer	GSE42040	GSM1031000	T	None	8.82972
776	Blood-Cancer	GSE42040	GSM1031001	T	None	9.06609
777	Blood-Cancer	GSE42040	GSM1031002	T	None	8.59991
778	Blood-Cancer	GSE42040	GSM1031003	T	None	8.07146
779	Blood-Cancer	GSE42040	GSM1031004	T	None	8.40514
780	Blood-Cancer	GSE42040	GSM1031005	T	None	8.06609
781	Blood-Cancer	GSE42040	GSM1031006	T	None	8.75489
782	Blood-Cancer	GSE42040	GSM1031007	T	None	8.2384
783	Blood-Cancer	GSE42040	GSM1031008	T	None	9.20457
784	Blood-Cancer	GSE42040	GSM1031009	T	None	8.9542
785	Blood-Cancer	GSE42040	GSM1031010	T	None	8.36194
786	Blood-Cancer	GSE42040	GSM1031011	T	None	8.7879
787	Blood-Cancer	GSE42040	GSM1031012	T	None	8.31288
788	Blood-Cancer	GSE42040	GSM1031013	T	None	8.7211
789	Blood-Cancer	GSE42040	GSM1031014	T	None	8.66178
790	Blood-Cancer	GSE42040	GSM1031015	T	None	8.38802
791	Blood-Cancer	GSE42040	GSM1031016	T	None	9.33762
792	Blood-Cancer	GSE42040	GSM1031017	T	None	8.54689
793	Blood-Cancer	GSE42040	GSM1031018	T	None	8.683
794	Blood-Cancer	GSE42040	GSM1031019	T	None	8.7879
795	Blood-Cancer	GSE42040	GSM1031020	T	None	8.56224
796	Blood-Cancer	GSE42040	GSM1031021	T	None	8.22882
797	Blood-Cancer	GSE42040	GSM1031022	T	None	8.88874
798	Blood-Cancer	GSE42040	GSM1031023	T	None	8.44708
799	Blood-Cancer	GSE42040	GSM1031024	T	None	8.15987
800	Blood-Cancer	GSE42040	GSM1031025	T	None	9.04166
801	Blood-Cancer	GSE42040	GSM1031026	T	None	8.82337
802	Blood-Cancer	GSE42040	GSM1031027	T	None	8.65105
803	Blood-Cancer	GSE42040	GSM1031028	T	None	8.23362
804	Blood-Cancer	GSE42040	GSM1031029	T	None	8.61838
805	Blood-Cancer	GSE42040	GSM1031030	T	None	8.39232
806	Blood-Cancer	GSE42040	GSM1031031	T	None	9.0634
807	Blood-Cancer	GSE42040	GSM1031032	T	None	8.53138
808	Blood-Cancer	GSE42040	GSM1031033	T	None	9.18239
809	Blood-Cancer	GSE42040	GSM1031034	T	None	8.47978
810	Blood-Cancer	GSE42040	GSM1031035	T	None	8.97728
811	Blood-Cancer	GSE42040	GSM1031036	T	None	9.41574
812	Blood-Cancer	GSE42040	GSM1031037	T	None	8.04439
813	Blood-Cancer	GSE42040	GSM1031038	T	None	8.63662
814	Blood-Cancer	GSE42040	GSM1031039	T	None	9.52356
815	Blood-Cancer	GSE42040	GSM1031040	T	None	9.41574
816	Blood-Cancer	GSE42064	GSM1031831	T	None	8.59246
817	Blood-Cancer	GSE42064	GSM1031832	T	None	8.53138
818	Blood-Cancer	GSE42064	GSM1031833	T	None	8.08215
819	Blood-Cancer	GSE42064	GSM1031834	T	None	8.26209
820	Blood-Cancer	GSE42064	GSM1031835	T	None	9.35975
821	Blood-Cancer	GSE42064	GSM1031836	T	None	9.40514
822	Blood-Cancer	GSE42064	GSM1031837	T	None	8.7039
823	Blood-Cancer	GSE42064	GSM1031838	T	None	7.69349
824	Blood-Cancer	GSE42064	GSM1031839	T	None	8.27612
825	Blood-Cancer	GSE42064	GSM1031840	T	None	7.70736
826	Blood-Cancer	GSE42064	GSM1031841	T	None	8.09276
827	Blood-Cancer	GSE42064	GSM1031842	T	None	8.47573
828	Blood-Cancer	GSE42064	GSM1031843	T	None	8.04439
829	Blood-Cancer	GSE42064	GSM1031844	T	None	7.70736
830	Blood-Cancer	GSE42064	GSM1031845	T	None	7.62936
831	Blood-Cancer	GSE42064	GSM1031846	T	None	7.71425
832	Blood-Cancer	GSE42064	GSM1031847	T	None	8.27146
833	Blood-Cancer	GSE42064	GSM1031848	T	None	7.16993
834	Blood-Cancer	GSE42064	GSM1031849	T	None	8.12412
835	Blood-Cancer	GSE42064	GSM1031850	T	None	6.83289
836	Blood-Cancer	GSE42064	GSM1031851	T	None	8.69349
837	Blood-Cancer	GSE42064	GSM1031852	T	None	8.17991
838	Blood-Cancer	GSE42064	GSM1031853	T	None	6.61471
839	Blood-Cancer	GSE42064	GSM1031854	T	None	8.31288
840	Blood-Cancer	GSE42064	GSM1031855	T	None	9.1472
841	Blood-Cancer	GSE42064	GSM1031856	T	None	8.34873
842	Blood-Cancer	GSE42064	GSM1031857	T	None	9.08215
843	Blood-Cancer	GSE42064	GSM1031858	T	None	8.8857
844	Blood-Cancer	GSE42064	GSM1031859	T	None	7.32193
845	Blood-Cancer	GSE42064	GSM1031860	T	None	8.38802
846	Blood-Cancer	GSE42064	GSM1031861	T	None	8.31741
847	Blood-Cancer	GSE42064	GSM1031862	T	None	8.55075
848	Blood-Cancer	GSE42064	GSM1031863	T	None	8.38802
849	Blood-Cancer	GSE42064	GSM1031864	T	None	8.91588
850	Blood-Cancer	GSE42064	GSM1031865	T	None	8.70044
851	Blood-Cancer	GSE42064	GSM1031866	T	None	7.20945
852	Blood-Cancer	GSE42064	GSM1031867	T	None	8.50383
853	Blood-Cancer	GSE42064	GSM1031868	T	None	8.31288
918	Blood-Cancer	GSE44337	GSM1083475	T	None	7.87036
919	Blood-Cancer	GSE44337	GSM1083476	T	None	8
920	Blood-Cancer	GSE44337	GSM1083477	T	None	7.89482
921	Blood-Cancer	GSE44337	GSM1083478	T	None	7.69349
922	Blood-Cancer	GSE44337	GSM1083479	T	None	8.13955
923	Blood-Cancer	GSE44337	GSM1083480	T	None	8.09276
924	Blood-Cancer	GSE44337	GSM1083481	T	None	8.50383
925	Blood-Cancer	GSE44337	GSM1083482	T	None	8.18982
926	Blood-Cancer	GSE44337	GSM1083483	T	None	8.34873
929	Blood-Cancer	GSE45736	GSM1113422	T	None	9.10066
930	Blood-Cancer	GSE45736	GSM1113423	T	None	9.07682
931	Blood-Cancer	GSE45736	GSM1113424	T	None	7.97728
932	Blood-Cancer	GSE46170	GSM1125352	T	None	8.44708
933	Blood-Cancer	GSE46170	GSM1125353	T	None	7.45943
934	Blood-Cancer	GSE46170	GSM1125354	T	None	9.58496
935	Blood-Cancer	GSE46170	GSM1125355	T	None	8.29002
936	Blood-Cancer	GSE46170	GSM1125356	T	None	8.16491
937	Blood-Cancer	GSE46170	GSM1125357	T	None	7.39232
938	Blood-Cancer	GSE46170	GSM1125358	T	None	7.72792
939	Blood-Cancer	GSE46170	GSM1125359	T	None	7.94251
940	Blood-Cancer	GSE46170	GSM1125360	T	None	7.62205
941	Blood-Cancer	GSE46170	GSM1125361	T	None	7.59991
942	Blood-Cancer	GSE46170	GSM1125362	T	None	8.10852
943	Blood-Cancer	GSE46170	GSM1125363	T	None	8.32193
944	Blood-Cancer	GSE46170	GSM1125364	T	None	8.29002
945	Blood-Cancer	GSE46170	GSM1125365	T	None	7.88874
946	Blood-Cancer	GSE46170	GSM1125366	T	None	7.93664
947	Blood-Cancer	GSE46170	GSM1125367	T	None	7.34873
948	Blood-Cancer	GSE46170	GSM1125368	T	None	7.50779
949	Blood-Cancer	GSE46170	GSM1125369	T	None	8.19476
950	Blood-Cancer	GSE46170	GSM1125370	T	None	8.04985
951	Blood-Cancer	GSE46170	GSM1125372	T	None	8.63662
952	Blood-Cancer	GSE46170	GSM1125373	T	None	8.633
953	Blood-Cancer	GSE46170	GSM1125374	T	None	7.16993
954	Blood-Cancer	GSE46170	GSM1125375	T	None	8.12412
955	Blood-Cancer	GSE46170	GSM1125376	T	None	7.83289
956	Blood-Cancer	GSE46170	GSM1125377	T	None	7.7211
957	Blood-Cancer	GSE46170	GSM1125378	T	None	7.63663
958	Blood-Cancer	GSE46170	GSM1125383	T	None	8.04439
959	Blood-Cancer	GSE46170	GSM1125384	T	None	8.59246
960	Blood-Cancer	GSE46170	GSM1125386	T	None	8
961	Blood-Cancer	GSE46170	GSM1125387	T	None	8.22882
962	Blood-Cancer	GSE46170	GSM1125388	T	None	8.71768
963	Blood-Cancer	GSE46819	GSM1138793	T	None	8.58496
964	Blood-Cancer	GSE46819	GSM1138794	T	None	7.27612
965	Blood-Cancer	GSE46819	GSM1138795	T	None	8.40939
966	Blood-Cancer	GSE46819	GSM1138796	T	None	7.90689
967	Blood-Cancer	GSE46819	GSM1138797	T	None	8.66534
968	Blood-Cancer	GSE46819	GSM1138798	T	None	8.89178
969	Blood-Cancer	GSE46819	GSM1138799	T	None	7.50779
970	Blood-Cancer	GSE46819	GSM1138800	T	None	8.20945
971	Blood-Cancer	GSE46819	GSM1138801	T	None	8.53138
972	Blood-Cancer	GSE46819	GSM1138802	T	None	7.83289
973	Blood-Cancer	GSE46819	GSM1138803	T	None	7.56224
974	Blood-Cancer	GSE46819	GSM1138804	T	None	8.37504
979	Blood-Cancer	GSE49032	GSM1143783	T	None	8.02237
980	Blood-Cancer	GSE49032	GSM1143784	T	None	7.43463
981	Blood-Cancer	GSE49032	GSM1143785	T	None	7.56986
982	Blood-Cancer	GSE49032	GSM1143786	T	None	7.49185
983	Blood-Cancer	GSE49032	GSM1143787	T	None	8.14466
984	Blood-Cancer	GSE49032	GSM1143788	T	None	7.13955
985	Blood-Cancer	GSE49032	GSM1143789	T	None	8.51964
986	Blood-Cancer	GSE49032	GSM1143790	T	None	8.90989
987	Blood-Cancer	GSE49032	GSM1143791	T	None	8.10329
988	Blood-Cancer	GSE49032	GSM1143792	T	None	7.96578
989	Blood-Cancer	GSE49032	GSM1143793	T	None	7.45943
990	Blood-Cancer	GSE49032	GSM1143794	T	None	9.17991
991	Blood-Cancer	GSE49032	GSM1143795	T	None	8.83289
992	Blood-Cancer	GSE49032	GSM1143797	T	None	7.35755
993	Blood-Cancer	GSE49032	GSM1143798	T	None	7.77479
994	Blood-Cancer	GSE49032	GSM1143799	T	None	8.39232
995	Blood-Cancer	GSE49032	GSM1143800	T	None	8.0607
996	Blood-Cancer	GSE49032	GSM1143801	T	None	7.11894
997	Blood-Cancer	GSE49032	GSM1143802	T	None	7.74147
998	Blood-Cancer	GSE49032	GSM1143803	T	None	7.96
999	Blood-Cancer	GSE49032	GSM1143804	T	None	7.65105
1000	Blood-Cancer	GSE49032	GSM1143805	T	None	8.08215
1001	Blood-Cancer	GSE49032	GSM1143806	T	None	8.98299
1002	Blood-Cancer	GSE49032	GSM1143807	T	None	7.80736
1003	Blood-Cancer	GSE49032	GSM1143808	T	None	7.45943
1004	Blood-Cancer	GSE49032	GSM1143809	T	None	7.90087
1005	Blood-Cancer	GSE49032	GSM1143810	T	None	7.98868
1006	Blood-Cancer	GSE49032	GSM1143811	T	None	8.46761
1007	Blood-Cancer	GSE49032	GSM1143812	T	None	8.26679
1008	Blood-Cancer	GSE49032	GSM1143813	T	None	7
1009	Blood-Cancer	GSE49032	GSM1143814	T	None	8.51964
1010	Blood-Cancer	GSE49032	GSM1143815	T	None	8.28077
1011	Blood-Cancer	GSE49032	GSM1143816	T	None	8.61471
1012	Blood-Cancer	GSE49032	GSM1143817	T	None	8.69697
1013	Blood-Cancer	GSE49032	GSM1143818	T	None	8.37069
1014	Blood-Cancer	GSE49032	GSM1143819	T	None	7.43463
1015	Blood-Cancer	GSE49032	GSM1143820	T	None	7.77479
1016	Blood-Cancer	GSE49032	GSM1143821	T	None	7.66534
1017	Blood-Cancer	GSE49032	GSM1143822	T	None	7.59991
1018	Blood-Cancer	GSE49032	GSM1143823	T	None	7.87036
1019	Blood-Cancer	GSE49032	GSM1143824	T	None	7.40939
1020	Blood-Cancer	GSE49032	GSM1143825	T	None	7.6865
1021	Blood-Cancer	GSE49032	GSM1143826	T	None	7.59246
1022	Blood-Cancer	GSE49032	GSM1143827	T	None	8.93958
1023	Blood-Cancer	GSE49032	GSM1143828	T	None	7.56986
1024	Blood-Cancer	GSE49032	GSM1143829	T	None	8.08746
1025	Blood-Cancer	GSE49032	GSM1143830	T	None	8.33539
1026	Blood-Cancer	GSE49032	GSM1143831	T	None	8.03892
1027	Blood-Cancer	GSE49032	GSM1143832	T	None	7.52356
1028	Blood-Cancer	GSE49032	GSM1143833	T	None	7.88264
1029	Blood-Cancer	GSE49032	GSM1143834	T	None	7.27612
1030	Blood-Cancer	GSE49032	GSM1143835	T	None	7.72792
1031	Blood-Cancer	GSE49032	GSM1143836	T	None	7.73471
1032	Blood-Cancer	GSE49032	GSM1143837	T	None	7.50779
1033	Blood-Cancer	GSE49032	GSM1143838	T	None	7.40939
1034	Blood-Cancer	GSE49032	GSM1143839	T	None	7.37504
1035	Blood-Cancer	GSE49032	GSM1143840	T	None	7.65821
1036	Blood-Cancer	GSE49032	GSM1143841	T	None	7.86419
1037	Blood-Cancer	GSE49032	GSM1143842	T	None	8.26209
1038	Blood-Cancer	GSE49032	GSM1143843	T	None	7.32193
1039	Blood-Cancer	GSE49032	GSM1143844	T	None	7.44294
1040	Blood-Cancer	GSE49032	GSM1143845	T	None	8.73471
1041	Blood-Cancer	GSE49032	GSM1143846	T	None	7.53916
1042	Blood-Cancer	GSE49032	GSM1143847	T	None	7.18982
1043	Blood-Cancer	GSE49032	GSM1143848	T	None	6.74147
1044	Blood-Cancer	GSE49032	GSM1143849	T	None	6.97728
1045	Blood-Cancer	GSE49032	GSM1143850	T	None	7.15987
1046	Blood-Cancer	GSE49032	GSM1143851	T	None	7.48382
1047	Blood-Cancer	GSE49032	GSM1143852	T	None	7.70736
1048	Blood-Cancer	GSE49032	GSM1143853	T	None	6.87036
1049	Blood-Cancer	GSE49032	GSM1143854	T	None	6.61471
1050	Blood-Cancer	GSE49032	GSM1143855	T	None	7.33092
1051	Blood-Cancer	GSE49032	GSM1143856	T	None	7.82018
1052	Blood-Cancer	GSE49032	GSM1143857	T	None	7.8392
1053	Blood-Cancer	GSE49032	GSM1143858	T	None	8.6865
1054	Blood-Cancer	GSE49032	GSM1143859	T	None	6.59991
1055	Blood-Cancer	GSE49032	GSM1143860	T	None	7.71425
1056	Blood-Cancer	GSE49032	GSM1143865	T	None	7.31288
1057	Blood-Cancer	GSE49032	GSM1143866	T	None	7.64386
1058	Blood-Cancer	GSE49032	GSM1143867	T	None	7.56986
1059	Blood-Cancer	GSE49032	GSM1143868	T	None	7.90689
1060	Blood-Cancer	GSE49032	GSM1143869	T	None	7.40939
1061	Blood-Cancer	GSE49032	GSM1143872	T	None	7.61471
1062	Blood-Cancer	GSE49032	GSM1143873	T	None	7.65821
1063	Blood-Cancer	GSE49032	GSM1143874	T	None	7.34873
1064	Blood-Cancer	GSE49032	GSM1143876	T	None	8.3443
1065	Blood-Cancer	GSE49032	GSM1143877	T	None	8.30834
1066	Blood-Cancer	GSE49032	GSM1143878	T	None	8.50779
1067	Blood-Cancer	GSE49032	GSM1143879	T	None	9.0954
1068	Blood-Cancer	GSE49032	GSM1143880	T	None	8.24793
1069	Blood-Cancer	GSE49032	GSM1143881	T	None	8.11894
1070	Blood-Cancer	GSE49032	GSM1143882	T	None	7.08746
1071	Blood-Cancer	GSE49032	GSM1143883	T	None	7.74147
1072	Blood-Cancer	GSE49032	GSM1143884	T	None	8.44708
1073	Blood-Cancer	GSE49032	GSM1143885	T	None	7.80736
1074	Blood-Cancer	GSE49032	GSM1143886	T	None	7.49985
1075	Blood-Cancer	GSE49032	GSM1143887	T	None	7.6865
1076	Blood-Cancer	GSE49032	GSM1143888	T	None	7.53138
1077	Blood-Cancer	GSE49032	GSM1143889	T	None	8.30834
1078	Blood-Cancer	GSE47355	GSM1148070	T	None	7.8392
1079	Blood-Cancer	GSE47355	GSM1148071	T	None	6.75489
1080	Blood-Cancer	GSE47355	GSM1148072	T	None	7.87652
1081	Blood-Cancer	GSE47355	GSM1148073	T	None	8.15987
1082	Blood-Cancer	GSE2109	GSM117688	T	None	8.5812
1083	Blood-Cancer	GSE2109	GSM117765	T	None	7.3837
1084	Blood-Cancer	GSE2109	GSM117771	T	None	7.87036
1085	Blood-Cancer	GSE50006	GSM1211900	T	None	8.07146
1086	Blood-Cancer	GSE50006	GSM1211901	T	None	7.69349
1087	Blood-Cancer	GSE50006	GSM1211902	T	None	8.42627
1088	Blood-Cancer	GSE50006	GSM1211903	T	None	8.11894
1089	Blood-Cancer	GSE50006	GSM1211904	T	None	9.07146
1090	Blood-Cancer	GSE50006	GSM1211905	T	None	8.04985
1091	Blood-Cancer	GSE50006	GSM1211906	T	None	7.73471
1092	Blood-Cancer	GSE50006	GSM1211907	T	None	8.19967
1093	Blood-Cancer	GSE50006	GSM1211922	T	None	7.87036
1094	Blood-Cancer	GSE50006	GSM1211923	T	None	8.14466
1095	Blood-Cancer	GSE50006	GSM1211924	T	None	8.22882
1096	Blood-Cancer	GSE50006	GSM1211925	T	None	7.88264
1097	Blood-Cancer	GSE50006	GSM1211926	T	None	7.88874
1098	Blood-Cancer	GSE50006	GSM1211927	T	None	8.29002
1099	Blood-Cancer	GSE50006	GSM1211932	T	None	7.34873
1100	Blood-Cancer	GSE50006	GSM1211933	T	None	7.31288
1101	Blood-Cancer	GSE50006	GSM1211934	T	None	7.43463
1102	Blood-Cancer	GSE50006	GSM1211935	T	None	6.75489
1103	Blood-Cancer	GSE50006	GSM1211936	T	None	7.49985
1104	Blood-Cancer	GSE50006	GSM1211937	T	None	7.19967
1105	Blood-Cancer	GSE50006	GSM1211938	T	None	5.52356
1106	Blood-Cancer	GSE50006	GSM1211939	T	None	7.09803
1107	Blood-Cancer	GSE50006	GSM1211940	T	None	6.79442
1108	Blood-Cancer	GSE50006	GSM1211941	T	None	7.59246
1109	Blood-Cancer	GSE50006	GSM1211942	T	None	7.63663
1110	Blood-Cancer	GSE50006	GSM1211943	T	None	6.2854
1111	Blood-Cancer	GSE50006	GSM1211944	T	None	7.01123
1112	Blood-Cancer	GSE50006	GSM1211945	T	None	7.30378
1113	Blood-Cancer	GSE50006	GSM1211946	T	None	7.32193
1114	Blood-Cancer	GSE50006	GSM1211947	T	None	7.32193
1115	Blood-Cancer	GSE50006	GSM1211948	T	None	7.15987
1116	Blood-Cancer	GSE50006	GSM1211949	T	None	7.29462
1117	Blood-Cancer	GSE50006	GSM1211950	T	None	7.41785
1118	Blood-Cancer	GSE50006	GSM1211951	T	None	7.45121
1119	Blood-Cancer	GSE50006	GSM1211952	T	None	7.2854
1120	Blood-Cancer	GSE50006	GSM1211953	T	None	7.47573
1121	Blood-Cancer	GSE50006	GSM1211954	T	None	7.81378
1122	Blood-Cancer	GSE50006	GSM1211955	T	None	7.12928
1123	Blood-Cancer	GSE50006	GSM1211956	T	None	7.54689
1124	Blood-Cancer	GSE50006	GSM1211957	T	None	7.7211
1125	Blood-Cancer	GSE50006	GSM1211958	T	None	7.25739
1126	Blood-Cancer	GSE50006	GSM1211959	T	None	7.33985
1127	Blood-Cancer	GSE50006	GSM1211960	T	None	7.66534
1128	Blood-Cancer	GSE50006	GSM1211967	T	None	6.71425
1129	Blood-Cancer	GSE50006	GSM1211968	T	None	7.05528
1130	Blood-Cancer	GSE50006	GSM1211969	T	None	6.90689
1131	Blood-Cancer	GSE50006	GSM1211970	T	None	7.17991
1132	Blood-Cancer	GSE50006	GSM1211971	T	None	7.44294
1133	Blood-Cancer	GSE50006	GSM1211972	T	None	6.55459
1134	Blood-Cancer	GSE50006	GSM1211973	T	None	6.6865
1135	Blood-Cancer	GSE50006	GSM1211974	T	None	7.05528
1136	Blood-Cancer	GSE50006	GSM1211975	T	None	6.82018
1137	Blood-Cancer	GSE50006	GSM1211976	T	None	6.82018
1138	Blood-Cancer	GSE50006	GSM1211977	T	None	7.21917
1139	Blood-Cancer	GSE50006	GSM1211978	T	None	6.20945
1140	Blood-Cancer	GSE50006	GSM1211979	T	None	7.62936
1141	Blood-Cancer	GSE50006	GSM1211980	T	None	7.67243
1142	Blood-Cancer	GSE50006	GSM1211981	T	None	6.79442
1143	Blood-Cancer	GSE50006	GSM1211982	T	None	7.39232
1144	Blood-Cancer	GSE50006	GSM1211983	T	None	6.67243
1145	Blood-Cancer	GSE50006	GSM1211984	T	None	7.8009
1146	Blood-Cancer	GSE50006	GSM1211985	T	None	7.10852
1147	Blood-Cancer	GSE50006	GSM1211986	T	None	7.18982
1148	Blood-Cancer	GSE50006	GSM1211987	T	None	7.20945
1149	Blood-Cancer	GSE50006	GSM1211988	T	None	7.45121
1150	Blood-Cancer	GSE50006	GSM1211989	T	None	7.43463
1151	Blood-Cancer	GSE50006	GSM1211990	T	None	7.50779
1152	Blood-Cancer	GSE50006	GSM1211991	T	None	7.07682
1153	Blood-Cancer	GSE50006	GSM1211992	T	None	6.93074
1154	Blood-Cancer	GSE50006	GSM1211993	T	None	6.93074
1155	Blood-Cancer	GSE50006	GSM1211994	T	None	7.24793
1156	Blood-Cancer	GSE50006	GSM1211995	T	None	7.37504
1157	Blood-Cancer	GSE50006	GSM1211996	T	None	6.94251
1158	Blood-Cancer	GSE50006	GSM1211997	T	None	7.05528
1159	Blood-Cancer	GSE50006	GSM1211998	T	None	7.45943
1160	Blood-Cancer	GSE50006	GSM1211999	T	None	6.90689
1161	Blood-Cancer	GSE50006	GSM1212000	T	None	7.20945
1162	Blood-Cancer	GSE50006	GSM1212001	T	None	7.08746
1163	Blood-Cancer	GSE50006	GSM1212002	T	None	7.13955
1164	Blood-Cancer	GSE50006	GSM1212003	T	None	6.82018
1165	Blood-Cancer	GSE50006	GSM1212004	T	None	7.58496
1166	Blood-Cancer	GSE50006	GSM1212005	T	None	7.04439
1167	Blood-Cancer	GSE50006	GSM1212008	T	None	7.03342
1168	Blood-Cancer	GSE50006	GSM1212009	T	None	7.30378
1169	Blood-Cancer	GSE50006	GSM1212010	T	None	7.17991
1170	Blood-Cancer	GSE50006	GSM1212011	T	None	6.58496
1171	Blood-Cancer	GSE50006	GSM1212012	T	None	6.88264
1172	Blood-Cancer	GSE50006	GSM1212013	T	None	7.29462
1173	Blood-Cancer	GSE50006	GSM1212014	T	None	7.39232
1174	Blood-Cancer	GSE50006	GSM1212015	T	None	7.60733
1175	Blood-Cancer	GSE50006	GSM1212016	T	None	7.52356
1176	Blood-Cancer	GSE50006	GSM1212017	T	None	7.76155
1177	Blood-Cancer	GSE50006	GSM1212018	T	None	7.32193
1178	Blood-Cancer	GSE50006	GSM1212019	T	None	6.82018
1179	Blood-Cancer	GSE50006	GSM1212020	T	None	8.2384
1180	Blood-Cancer	GSE50006	GSM1212021	T	None	6.97728
1181	Blood-Cancer	GSE50006	GSM1212022	T	None	8.33985
1182	Blood-Cancer	GSE50006	GSM1212023	T	None	8.50779
1183	Blood-Cancer	GSE50006	GSM1212024	T	None	7.87652
1184	Blood-Cancer	GSE50006	GSM1212025	T	None	8.09803
1185	Blood-Cancer	GSE50006	GSM1212026	T	None	7.96
1186	Blood-Cancer	GSE50006	GSM1212027	T	None	8.10329
1187	Blood-Cancer	GSE50006	GSM1212028	T	None	8.04985
1188	Blood-Cancer	GSE50006	GSM1212029	T	None	8.43463
1189	Blood-Cancer	GSE50006	GSM1212030	T	None	8.10852
1190	Blood-Cancer	GSE50006	GSM1212031	T	None	8.03342
1191	Blood-Cancer	GSE50006	GSM1212032	T	None	7.88264
1192	Blood-Cancer	GSE50006	GSM1212033	T	None	8.47978
1193	Blood-Cancer	GSE50006	GSM1212034	T	None	8.30834
1194	Blood-Cancer	GSE50006	GSM1212035	T	None	8.12928
1195	Blood-Cancer	GSE50006	GSM1212036	T	None	7.83289
1196	Blood-Cancer	GSE50006	GSM1212037	T	None	7.91289
1197	Blood-Cancer	GSE50006	GSM1212038	T	None	8.34873
1198	Blood-Cancer	GSE50006	GSM1212039	T	None	8.19476
1199	Blood-Cancer	GSE50006	GSM1212040	T	None	7.7211
1200	Blood-Cancer	GSE50006	GSM1212041	T	None	7.81378
1201	Blood-Cancer	GSE50006	GSM1212042	T	None	7.83289
1202	Blood-Cancer	GSE50006	GSM1212043	T	None	7.98868
1203	Blood-Cancer	GSE50006	GSM1212044	T	None	8.21917
1204	Blood-Cancer	GSE50006	GSM1212045	T	None	7.7879
1205	Blood-Cancer	GSE50006	GSM1212046	T	None	8.09276
1206	Blood-Cancer	GSE50006	GSM1212047	T	None	7.60733
1207	Blood-Cancer	GSE50006	GSM1212048	T	None	8.02791
1208	Blood-Cancer	GSE50006	GSM1212049	T	None	7.66534
1209	Blood-Cancer	GSE50006	GSM1212050	T	None	7.39232
1210	Blood-Cancer	GSE50006	GSM1212051	T	None	7.90689
1211	Blood-Cancer	GSE50006	GSM1212052	T	None	8.43045
1212	Blood-Cancer	GSE50006	GSM1212053	T	None	7.60733
1213	Blood-Cancer	GSE50006	GSM1212054	T	None	7.17991
1214	Blood-Cancer	GSE50006	GSM1212055	T	None	8.01123
1215	Blood-Cancer	GSE50006	GSM1212056	T	None	8.07146
1216	Blood-Cancer	GSE50006	GSM1212057	T	None	7.86419
1217	Blood-Cancer	GSE50006	GSM1212058	T	None	8.26209
1218	Blood-Cancer	GSE50006	GSM1212059	T	None	7.98868
1219	Blood-Cancer	GSE50006	GSM1212060	T	None	7.75489
1220	Blood-Cancer	GSE50006	GSM1212061	T	None	8.18982
1221	Blood-Cancer	GSE50006	GSM1212062	T	None	8.16992
1222	Blood-Cancer	GSE50006	GSM1212063	T	None	7.46761
1223	Blood-Cancer	GSE50006	GSM1212064	T	None	7.89482
1224	Blood-Cancer	GSE50006	GSM1212065	T	None	8.41785
1225	Blood-Cancer	GSE50006	GSM1212066	T	None	7.93074
1226	Blood-Cancer	GSE50006	GSM1212067	T	None	7.92481
1227	Blood-Cancer	GSE50006	GSM1212068	T	None	8.33985
1228	Blood-Cancer	GSE50006	GSM1212069	T	None	8.2854
1229	Blood-Cancer	GSE50006	GSM1212070	T	None	7.49985
1230	Blood-Cancer	GSE50006	GSM1212071	T	None	8.48784
1231	Blood-Cancer	GSE50006	GSM1212072	T	None	7.72792
1232	Blood-Cancer	GSE50006	GSM1212073	T	None	7.65821
1233	Blood-Cancer	GSE50006	GSM1212074	T	None	8.46353
1234	Blood-Cancer	GSE50006	GSM1212075	T	None	8.40514
1235	Blood-Cancer	GSE50006	GSM1212076	T	None	8.27612
1236	Blood-Cancer	GSE50006	GSM1212077	T	None	8.15987
1237	Blood-Cancer	GSE50006	GSM1212078	T	None	7.83289
1238	Blood-Cancer	GSE50006	GSM1212080	T	None	7.37504
1239	Blood-Cancer	GSE50006	GSM1212081	T	None	7.90689
1240	Blood-Cancer	GSE50006	GSM1212082	T	None	7.90689
1241	Blood-Cancer	GSE50006	GSM1212083	T	None	8.19967
1242	Blood-Cancer	GSE50006	GSM1212084	T	None	8.22882
1243	Blood-Cancer	GSE50006	GSM1212085	T	None	8.13955
1244	Blood-Cancer	GSE50006	GSM1212086	T	None	8.56605
1245	Blood-Cancer	GSE50006	GSM1212087	T	None	7.03342
1246	Blood-Cancer	GSE50006	GSM1212088	T	None	8.16491
1247	Blood-Cancer	GSE50006	GSM1212089	T	None	8.05528
1248	Blood-Cancer	GSE50006	GSM1212090	T	None	8.08215
1249	Blood-Cancer	GSE50006	GSM1212091	T	None	8.13955
1250	Blood-Cancer	GSE50006	GSM1212092	T	None	8.45943
1251	Blood-Cancer	GSE50006	GSM1212093	T	None	8.06609
1252	Blood-Cancer	GSE50006	GSM1212094	T	None	8.00563
1253	Blood-Cancer	GSE50006	GSM1212095	T	None	8.64024
1254	Blood-Cancer	GSE50006	GSM1212096	T	None	7.96578
1255	Blood-Cancer	GSE50006	GSM1212097	T	None	8.37069
1256	Blood-Cancer	GSE50006	GSM1212098	T	None	8.45943
1257	Blood-Cancer	GSE50006	GSM1212099	T	None	8.36632
1258	Blood-Cancer	GSE50006	GSM1212100	T	None	8.14975
1259	Blood-Cancer	GSE50006	GSM1212101	T	None	8.03892
1260	Blood-Cancer	GSE50006	GSM1212102	T	None	7.8392
1261	Blood-Cancer	GSE50006	GSM1212103	T	None	8.58872
1262	Blood-Cancer	GSE50006	GSM1212104	T	None	8.11894
1263	Blood-Cancer	GSE50006	GSM1212105	T	None	8.61471
1264	Blood-Cancer	GSE50006	GSM1212106	T	None	8.28077
1265	Blood-Cancer	GSE50006	GSM1212107	T	None	8.30834
1266	Blood-Cancer	GSE50006	GSM1212108	T	None	8.13443
1267	Blood-Cancer	GSE50006	GSM1212109	T	None	8.17493
1268	Blood-Cancer	GSE50006	GSM1212110	T	None	7.54689
1269	Blood-Cancer	GSE50006	GSM1212111	T	None	7.87652
1270	Blood-Cancer	GSE50006	GSM1212112	T	None	7.7211
1271	Blood-Cancer	GSE50006	GSM1212113	T	None	7.70044
1272	Blood-Cancer	GSE50006	GSM1212114	T	None	7.88264
1273	Blood-Cancer	GSE50006	GSM1212115	T	None	8.44708
1274	Blood-Cancer	GSE50006	GSM1212116	T	None	7.88264
1275	Blood-Cancer	GSE50006	GSM1212117	T	None	8.09276
1276	Blood-Cancer	GSE50006	GSM1212118	T	None	8.43879
1277	Blood-Cancer	GSE50006	GSM1212119	T	None	8.26209
1278	Blood-Cancer	GSE50006	GSM1212120	T	None	8.48784
1279	Blood-Cancer	GSE50006	GSM1212121	T	None	8.18488
1280	Blood-Cancer	GSE50006	GSM1212122	T	None	8.35755
1281	Blood-Cancer	GSE50006	GSM1212123	T	None	8.26679
1282	Blood-Cancer	GSE50006	GSM1212124	T	None	8.01123
1283	Blood-Cancer	GSE50006	GSM1212125	T	None	8.14975
1284	Blood-Cancer	GSE50006	GSM1212126	T	None	6.85798
1285	Blood-Cancer	GSE50006	GSM1212127	T	None	8.10329
1286	Blood-Cancer	GSE50006	GSM1212128	T	None	8.11374
1287	Blood-Cancer	GSE50006	GSM1212129	T	None	8.25739
1288	Blood-Cancer	GSE50006	GSM1212130	T	None	7.74147
1289	Blood-Cancer	GSE50006	GSM1212131	T	None	7.98299
1290	Blood-Cancer	GSE50006	GSM1212132	T	None	7.41785
1291	Blood-Cancer	GSE50006	GSM1212133	T	None	7.47573
1292	Blood-Cancer	GSE50006	GSM1212134	T	None	7.90689
1293	Blood-Cancer	GSE50006	GSM1212135	T	None	8.25739
1294	Blood-Cancer	GSE50006	GSM1212136	T	None	8.30834
1295	Blood-Cancer	GSE50006	GSM1212137	T	None	7.58496
1296	Blood-Cancer	GSE50006	GSM1212138	T	None	8.03892
1297	Blood-Cancer	GSE50006	GSM1212139	T	None	8.43045
1298	Blood-Cancer	GSE50006	GSM1212140	T	None	8.31741
1299	Blood-Cancer	GSE50006	GSM1212141	T	None	7.56986
1300	Blood-Cancer	GSE50006	GSM1212144	T	None	7.74819
1301	Blood-Cancer	GSE50006	GSM1212145	T	None	7.93664
1302	Blood-Cancer	GSE50006	GSM1212146	T	None	8.18982
1303	Blood-Cancer	GSE50006	GSM1212147	T	None	8.55075
1304	Blood-Cancer	GSE50006	GSM1212148	T	None	7.69349
1305	Blood-Cancer	GSE50006	GSM1212149	T	None	7.94837
1306	Blood-Cancer	GSE50006	GSM1212150	T	None	8.11894
1307	Blood-Cancer	GSE50006	GSM1212151	T	None	7.45121
1308	Blood-Cancer	GSE50006	GSM1212152	T	None	7.53916
1309	Blood-Cancer	GSE50006	GSM1212153	T	None	8.33092
1310	Blood-Cancer	GSE50006	GSM1212154	T	None	7.88264
1311	Blood-Cancer	GSE50006	GSM1212155	T	None	7.76818
1312	Blood-Cancer	GSE50006	GSM1212156	T	None	7.46761
1313	Blood-Cancer	GSE50006	GSM1212157	T	None	8.45533
1314	Blood-Cancer	GSE50006	GSM1212158	T	None	7.65105
1315	Blood-Cancer	GSE50006	GSM1212159	T	None	8.31288
1316	Blood-Cancer	GSE50006	GSM1212160	T	None	7.87036
1317	Blood-Cancer	GSE50006	GSM1212161	T	None	8.16491
1318	Blood-Cancer	GSE50006	GSM1212162	T	None	8.13955
1319	Blood-Cancer	GSE50006	GSM1212163	T	None	8.00563
1320	Blood-Cancer	GSE50006	GSM1212164	T	None	8.49185
1321	Blood-Cancer	GSE50006	GSM1212165	T	None	8.30834
1322	Blood-Cancer	GSE50006	GSM1212166	T	None	7.8009
1323	Blood-Cancer	GSE50006	GSM1212167	T	None	7.93664
1324	Blood-Cancer	GSE50006	GSM1212168	T	None	7.90087
1325	Blood-Cancer	GSE50006	GSM1212169	T	None	7.49985
1326	Blood-Cancer	GSE50006	GSM1212170	T	None	8.51175
1327	Blood-Cancer	GSE50006	GSM1212171	T	None	8.13443
1328	Blood-Cancer	GSE50006	GSM1212172	T	None	7.66534
1329	Blood-Cancer	GSE50006	GSM1212173	T	None	8.19476
1330	Blood-Cancer	GSE50006	GSM1212176	T	None	7.97728
1337	Blood-Cancer	GSE50928	GSM1232585	T	None	7.14975
1338	Blood-Cancer	GSE50928	GSM1232586	T	None	8.15482
1339	Blood-Cancer	GSE50928	GSM1232587	T	None	7.61471
1340	Blood-Cancer	GSE50928	GSM1232588	T	None	8.30834
1341	Blood-Cancer	GSE50928	GSM1232589	T	None	7.94837
1342	Blood-Cancer	GSE50928	GSM1232590	T	None	7.89482
1343	Blood-Cancer	GSE50928	GSM1232591	T	None	7.10852
1344	Blood-Cancer	GSE50928	GSM1232592	T	None	7.74147
1345	Blood-Cancer	GSE50928	GSM1232593	T	None	7.98868
1346	Blood-Cancer	GSE50928	GSM1232594	T	None	7.72792
1347	Blood-Cancer	GSE50928	GSM1232595	T	None	8.02791
1348	Blood-Cancer	GSE50928	GSM1232596	T	None	7.82018
1349	Blood-Cancer	GSE50928	GSM1232597	T	None	7.97728
1353	Blood-Cancer	GSE53251	GSM1267671	T	None	6.82018
1354	Blood-Cancer	GSE53251	GSM1267672	T	None	7.22882
1355	Blood-Cancer	GSE53251	GSM1267673	T	None	8.05528
1356	Blood-Cancer	GSE53251	GSM1267675	T	None	7.26679
1357	Blood-Cancer	GSE53251	GSM1267676	T	None	7.84549
1358	Blood-Cancer	GSE53251	GSM1267677	T	None	7.19967
1359	Blood-Cancer	GSE53251	GSM1267678	T	None	7.12928
1360	Blood-Cancer	GSE53251	GSM1267680	T	None	7.16993
1361	Blood-Cancer	GSE53251	GSM1267681	T	None	7.44294
1362	Blood-Cancer	GSE53251	GSM1267682	T	None	7.50779
1363	Blood-Cancer	GSE53251	GSM1267683	T	None	6.93074
1364	Blood-Cancer	GSE53251	GSM1267684	T	None	7.46761
1365	Blood-Cancer	GSE53251	GSM1267685	T	None	8.04439
1366	Blood-Cancer	GSE53251	GSM1267686	T	None	7.53916
1367	Blood-Cancer	GSE52891	GSM1277548	T	None	8.9571
1368	Blood-Cancer	GSE52891	GSM1277549	T	None	8.6865
1369	Blood-Cancer	GSE52891	GSM1277550	T	None	8.96578
1370	Blood-Cancer	GSE52891	GSM1277551	T	None	8.32193
1371	Blood-Cancer	GSE52891	GSM1277552	T	None	7.82018
1372	Blood-Cancer	GSE52891	GSM1277553	T	None	8.35315
1373	Blood-Cancer	GSE52891	GSM1277554	T	None	8.83289
1374	Blood-Cancer	GSE52891	GSM1277555	T	None	8.19967
1375	Blood-Cancer	GSE52891	GSM1277556	T	None	8.83605
1376	Blood-Cancer	GSE52891	GSM1277557	T	None	8.53138
1377	Blood-Cancer	GSE52891	GSM1277558	T	None	7.98868
1378	Blood-Cancer	GSE52891	GSM1277559	T	None	8.01123
1379	Blood-Cancer	GSE52891	GSM1277560	T	None	8.80735
1380	Blood-Cancer	GSE52891	GSM1277561	T	None	8.04439
1381	Blood-Cancer	GSE52891	GSM1277562	T	None	7.67243
1382	Blood-Cancer	GSE52891	GSM1277563	T	None	8.04439
1383	Blood-Cancer	GSE52891	GSM1277564	T	None	7.74819
1384	Blood-Cancer	GSE52891	GSM1277565	T	None	8.73132
1385	Blood-Cancer	GSE52891	GSM1277566	T	None	8.3837
1386	Blood-Cancer	GSE52891	GSM1277567	T	None	8.33092
1387	Blood-Cancer	GSE52891	GSM1277568	T	None	8.79442
1388	Blood-Cancer	GSE52891	GSM1277569	T	None	7.93074
1389	Blood-Cancer	GSE52891	GSM1277570	T	None	8.46761
1390	Blood-Cancer	GSE53786	GSM1300747	T	None	7.18982
1391	Blood-Cancer	GSE53786	GSM1300748	T	None	7.82018
1392	Blood-Cancer	GSE53786	GSM1300749	T	None	7.93664
1393	Blood-Cancer	GSE53786	GSM1300750	T	None	7.24793
1394	Blood-Cancer	GSE53786	GSM1300751	T	None	7.88874
1395	Blood-Cancer	GSE53820	GSM1301481	T	None	7.74819
1396	Blood-Cancer	GSE53820	GSM1301482	T	None	7.83289
1397	Blood-Cancer	GSE53820	GSM1301483	T	None	7.93664
1398	Blood-Cancer	GSE53820	GSM1301484	T	None	7.9542
1399	Blood-Cancer	GSE53820	GSM1301485	T	None	7.96
1400	Blood-Cancer	GSE53820	GSM1301486	T	None	8.18982
1401	Blood-Cancer	GSE53820	GSM1301487	T	None	8.35315
1402	Blood-Cancer	GSE53820	GSM1301488	T	None	7.91289
1403	Blood-Cancer	GSE53820	GSM1301489	T	None	7.62205
1404	Blood-Cancer	GSE53820	GSM1301490	T	None	8.06609
1405	Blood-Cancer	GSE53820	GSM1301491	T	None	7.40088
1406	Blood-Cancer	GSE53820	GSM1301492	T	None	7.83289
1407	Blood-Cancer	GSE53820	GSM1301493	T	None	7.67948
1408	Blood-Cancer	GSE53820	GSM1301494	T	None	7.79442
1409	Blood-Cancer	GSE53820	GSM1301495	T	None	8.08215
1410	Blood-Cancer	GSE53820	GSM1301496	T	None	8.24793
1411	Blood-Cancer	GSE53820	GSM1301497	T	None	8.19967
1412	Blood-Cancer	GSE53820	GSM1301498	T	None	7.62205
1413	Blood-Cancer	GSE53820	GSM1301499	T	None	7.94837
1414	Blood-Cancer	GSE53820	GSM1301500	T	None	8.06609
1415	Blood-Cancer	GSE53820	GSM1301501	T	None	7.50779
1416	Blood-Cancer	GSE53820	GSM1301502	T	None	7.99435
1417	Blood-Cancer	GSE53820	GSM1301503	T	None	7.55459
1418	Blood-Cancer	GSE53820	GSM1301504	T	None	7.82655
1419	Blood-Cancer	GSE53820	GSM1301505	T	None	7.33985
1420	Blood-Cancer	GSE53820	GSM1301506	T	None	8.73471
1421	Blood-Cancer	GSE53820	GSM1301507	T	None	7.76818
1422	Blood-Cancer	GSE53820	GSM1301508	T	None	7.74147
1423	Blood-Cancer	GSE53820	GSM1301509	T	None	7.65821
1424	Blood-Cancer	GSE53820	GSM1301510	T	None	7.31288
1425	Blood-Cancer	GSE53820	GSM1301511	T	None	8.03892
1426	Blood-Cancer	GSE53820	GSM1301512	T	None	8.3443
1427	Blood-Cancer	GSE53820	GSM1301513	T	None	7.78136
1428	Blood-Cancer	GSE53820	GSM1301514	T	None	8.37069
1429	Blood-Cancer	GSE53820	GSM1301515	T	None	7.77479
1430	Blood-Cancer	GSE53820	GSM1301516	T	None	7.65821
1431	Blood-Cancer	GSE53820	GSM1301517	T	None	8.09276
1432	Blood-Cancer	GSE53820	GSM1301518	T	None	8.28077
1433	Blood-Cancer	GSE53820	GSM1301519	T	None	7.53916
1434	Blood-Cancer	GSE53820	GSM1301520	T	None	8.09276
1435	Blood-Cancer	GSE53820	GSM1301521	T	None	8.16992
1436	Blood-Cancer	GSE53820	GSM1301522	T	None	7.88874
1437	Blood-Cancer	GSE53820	GSM1301523	T	None	6.72792
1438	Blood-Cancer	GSE53820	GSM1301524	T	None	8.2854
1439	Blood-Cancer	GSE53820	GSM1301525	T	None	6.70044
1440	Blood-Cancer	GSE53820	GSM1301526	T	None	8.21432
1441	Blood-Cancer	GSE53820	GSM1301527	T	None	7.79442
1442	Blood-Cancer	GSE53820	GSM1301528	T	None	8.38802
1443	Blood-Cancer	GSE53820	GSM1301529	T	None	8.24317
1444	Blood-Cancer	GSE53820	GSM1301530	T	None	8.25267
1445	Blood-Cancer	GSE53820	GSM1301531	T	None	6.65821
1446	Blood-Cancer	GSE53820	GSM1301532	T	None	8.45533
1447	Blood-Cancer	GSE53820	GSM1301533	T	None	7.98868
1448	Blood-Cancer	GSE53820	GSM1301534	T	None	7.59246
1449	Blood-Cancer	GSE53820	GSM1301535	T	None	7.97728
1450	Blood-Cancer	GSE53820	GSM1301536	T	None	7.59991
1451	Blood-Cancer	GSE53820	GSM1301537	T	None	7.92481
1452	Blood-Cancer	GSE53820	GSM1301538	T	None	7.59246
1453	Blood-Cancer	GSE53820	GSM1301539	T	None	8.04439
1454	Blood-Cancer	GSE53820	GSM1301540	T	None	7.18982
1455	Blood-Cancer	GSE53820	GSM1301541	T	None	7.96
1456	Blood-Cancer	GSE53820	GSM1301542	T	None	7.34873
1457	Blood-Cancer	GSE53820	GSM1301543	T	None	6.61471
1458	Blood-Cancer	GSE53820	GSM1301544	T	None	8.04439
1459	Blood-Cancer	GSE53820	GSM1301545	T	None	7.64386
1460	Blood-Cancer	GSE53820	GSM1301546	T	None	7.83289
1461	Blood-Cancer	GSE53820	GSM1301547	T	None	7.91886
1462	Blood-Cancer	GSE53820	GSM1301548	T	None	7.70736
1463	Blood-Cancer	GSE53820	GSM1301549	T	None	8.16491
1464	Blood-Cancer	GSE53820	GSM1301550	T	None	7.76818
1465	Blood-Cancer	GSE53820	GSM1301551	T	None	8.2854
1466	Blood-Cancer	GSE53820	GSM1301552	T	None	7.90689
1467	Blood-Cancer	GSE53820	GSM1301553	T	None	7
1468	Blood-Cancer	GSE53820	GSM1301554	T	None	7.92481
1469	Blood-Cancer	GSE53820	GSM1301555	T	None	7.52356
1470	Blood-Cancer	GSE53820	GSM1301556	T	None	7.8009
1471	Blood-Cancer	GSE53820	GSM1301557	T	None	7.75489
1472	Blood-Cancer	GSE53820	GSM1301558	T	None	7.94251
1473	Blood-Cancer	GSE53820	GSM1301559	T	None	8.12928
1474	Blood-Cancer	GSE53820	GSM1301560	T	None	8.2384
1475	Blood-Cancer	GSE53820	GSM1301561	T	None	7.67948
1476	Blood-Cancer	GSE55267	GSM1332984	T	None	7.10852
1477	Blood-Cancer	GSE55267	GSM1332985	T	None	8.03342
1478	Blood-Cancer	GSE55267	GSM1332986	T	None	6.88264
1479	Blood-Cancer	GSE55267	GSM1332987	T	None	7.74819
1480	Blood-Cancer	GSE55267	GSM1332988	T	None	8.13443
1481	Blood-Cancer	GSE55267	GSM1332989	T	None	8.09803
1482	Blood-Cancer	GSE55267	GSM1332990	T	None	7.32193
1483	Blood-Cancer	GSE55267	GSM1332991	T	None	7.36632
1484	Blood-Cancer	GSE55267	GSM1332992	T	None	7.88874
1485	Blood-Cancer	GSE55267	GSM1332993	T	None	6.93074
1486	Blood-Cancer	GSE55267	GSM1332994	T	None	7.34873
1487	Blood-Cancer	GSE55267	GSM1332995	T	None	7.89482
1488	Blood-Cancer	GSE55267	GSM1332996	T	None	7.97728
1489	Blood-Cancer	GSE55267	GSM1332997	T	None	8.44708
1490	Blood-Cancer	GSE55267	GSM1332998	T	None	7.70736
1491	Blood-Cancer	GSE55267	GSM1332999	T	None	7.24793
1492	Blood-Cancer	GSE55267	GSM1333000	T	None	7.22882
1493	Blood-Cancer	GSE55267	GSM1333001	T	None	7.48382
1494	Blood-Cancer	GSE55267	GSM1333002	T	None	7.88874
1495	Blood-Cancer	GSE55267	GSM1333003	T	None	7.79442
1496	Blood-Cancer	GSE55267	GSM1333004	T	None	7.61471
1497	Blood-Cancer	GSE55267	GSM1333005	T	None	7.83289
1498	Blood-Cancer	GSE55267	GSM1333006	T	None	7.54689
1499	Blood-Cancer	GSE55267	GSM1333007	T	None	7.72792
1500	Blood-Cancer	GSE55267	GSM1333008	T	None	7.85798
1501	Blood-Cancer	GSE55267	GSM1333009	T	None	7.53916
1502	Blood-Cancer	GSE55267	GSM1333010	T	None	7.11894
1503	Blood-Cancer	GSE55267	GSM1333011	T	None	7.8009
1504	Blood-Cancer	GSE55267	GSM1333012	T	None	7.99435
1505	Blood-Cancer	GSE55267	GSM1333013	T	None	7.9542
1506	Blood-Cancer	GSE55267	GSM1333014	T	None	7.84549
1507	Blood-Cancer	GSE55267	GSM1333015	T	None	7.88874
1508	Blood-Cancer	GSE55267	GSM1333016	T	None	7.64386
1509	Blood-Cancer	GSE55267	GSM1333017	T	None	7.90689
1510	Blood-Cancer	GSE55267	GSM1333018	T	None	7.90689
1511	Blood-Cancer	GSE55267	GSM1333019	T	None	7.35755
1512	Blood-Cancer	GSE55267	GSM1333020	T	None	7.32193
1513	Blood-Cancer	GSE55267	GSM1333021	T	None	7.62936
1514	Blood-Cancer	GSE55267	GSM1333022	T	None	8.50779
1515	Blood-Cancer	GSE55267	GSM1333023	T	None	7.13955
1516	Blood-Cancer	GSE55267	GSM1333024	T	None	8.45121
1517	Blood-Cancer	GSE55267	GSM1333025	T	None	6.14975
1518	Blood-Cancer	GSE55267	GSM1333026	T	None	7.42626
1519	Blood-Cancer	GSE55267	GSM1333027	T	None	7.08746
1520	Blood-Cancer	GSE55267	GSM1333028	T	None	7.55459
1521	Blood-Cancer	GSE55267	GSM1333029	T	None	7.41785
1522	Blood-Cancer	GSE55267	GSM1333030	T	None	7.04439
1523	Blood-Cancer	GSE55267	GSM1333031	T	None	7.97154
1524	Blood-Cancer	GSE55267	GSM1333032	T	None	7.09803
1525	Blood-Cancer	GSE55267	GSM1333033	T	None	7.25739
1526	Blood-Cancer	GSE55267	GSM1333034	T	None	7.59991
1527	Blood-Cancer	GSE55267	GSM1333035	T	None	7.34873
1528	Blood-Cancer	GSE55267	GSM1333036	T	None	7.29462
1529	Blood-Cancer	GSE55267	GSM1333037	T	None	7.43463
1530	Blood-Cancer	GSE55267	GSM1333038	T	None	7.76818
1531	Blood-Cancer	GSE55267	GSM1333039	T	None	6.50779
1532	Blood-Cancer	GSE55267	GSM1333040	T	None	7.2384
1533	Blood-Cancer	GSE55267	GSM1333041	T	None	7.10852
1534	Blood-Cancer	GSE55267	GSM1333042	T	None	7.04439
1535	Blood-Cancer	GSE55267	GSM1333043	T	None	7.56224
1536	Blood-Cancer	GSE55267	GSM1333044	T	None	6.44294
1537	Blood-Cancer	GSE55267	GSM1333045	T	None	7.89482
1538	Blood-Cancer	GSE55267	GSM1333046	T	None	7.67243
1539	Blood-Cancer	GSE55267	GSM1333047	T	None	7.64386
1540	Blood-Cancer	GSE55267	GSM1333048	T	None	7.60733
1541	Blood-Cancer	GSE55267	GSM1333049	T	None	7.93074
1542	Blood-Cancer	GSE55267	GSM1333050	T	None	7.91289
1543	Blood-Cancer	GSE55267	GSM1333051	T	None	7.2854
1544	Blood-Cancer	GSE55267	GSM1333052	T	None	7.63663
1545	Blood-Cancer	GSE56237	GSM1357471	T	None	7.93664
1546	Blood-Cancer	GSE56237	GSM1357472	T	None	8.45121
1547	Blood-Cancer	GSE56237	GSM1357473	T	None	8.09803
1548	Blood-Cancer	GSE56237	GSM1357474	T	None	6.79442
1549	Blood-Cancer	GSE56237	GSM1357475	T	None	7.76818
1550	Blood-Cancer	GSE56237	GSM1357476	T	None	9.25503
1551	Blood-Cancer	GSE56237	GSM1357477	T	None	7.06609
1552	Blood-Cancer	GSE56237	GSM1357478	T	None	8.07682
1553	Blood-Cancer	GSE56237	GSM1357479	T	None	6.56986
1554	Blood-Cancer	GSE56237	GSM1357480	T	None	7.27612
1555	Blood-Cancer	GSE56237	GSM1357481	T	None	8.15987
1556	Blood-Cancer	GSE56237	GSM1357482	T	None	8.95128
1557	Blood-Cancer	GSE56237	GSM1357483	T	None	8.7039
1558	Blood-Cancer	GSE56237	GSM1357484	T	None	7.06609
1559	Blood-Cancer	GSE56237	GSM1357485	T	None	5.88264
1560	Blood-Cancer	GSE56237	GSM1357486	T	None	7.64386
1561	Blood-Cancer	GSE56237	GSM1357487	T	None	6.26679
1562	Blood-Cancer	GSE56237	GSM1357488	T	None	6.30378
1563	Blood-Cancer	GSE56237	GSM1357489	T	None	7.29462
1564	Blood-Cancer	GSE56237	GSM1357490	T	None	7
1565	Blood-Cancer	GSE56237	GSM1357491	T	None	5.12928
1566	Blood-Cancer	GSE56315	GSM1358939	T	None	7.24793
1567	Blood-Cancer	GSE56315	GSM1358940	T	None	7.81378
1568	Blood-Cancer	GSE56315	GSM1358941	T	None	8.11374
1569	Blood-Cancer	GSE56315	GSM1358942	T	None	7.86419
1570	Blood-Cancer	GSE56315	GSM1358943	T	None	8.01681
1571	Blood-Cancer	GSE56315	GSM1358944	T	None	7.22882
1572	Blood-Cancer	GSE56315	GSM1358945	T	None	6.71425
1573	Blood-Cancer	GSE56315	GSM1358946	T	None	6.30378
1574	Blood-Cancer	GSE56315	GSM1358947	T	None	7.74819
1575	Blood-Cancer	GSE56315	GSM1358948	T	None	7.65105
1576	Blood-Cancer	GSE56315	GSM1358949	T	None	7.56224
1577	Blood-Cancer	GSE56315	GSM1358950	T	None	7.6865
1578	Blood-Cancer	GSE56315	GSM1358951	T	None	7.77479
1579	Blood-Cancer	GSE56315	GSM1358952	T	None	7.88874
1580	Blood-Cancer	GSE56315	GSM1358953	T	None	7.67948
1581	Blood-Cancer	GSE56315	GSM1358954	T	None	7.8392
1582	Blood-Cancer	GSE56315	GSM1358955	T	None	7.32193
1583	Blood-Cancer	GSE56315	GSM1358956	T	None	7.47573
1584	Blood-Cancer	GSE56315	GSM1358957	T	None	7.35755
1585	Blood-Cancer	GSE56315	GSM1358958	T	None	7.64386
1586	Blood-Cancer	GSE56315	GSM1358959	T	None	7.35755
1587	Blood-Cancer	GSE56315	GSM1358960	T	None	7.16993
1588	Blood-Cancer	GSE56315	GSM1358961	T	None	7.87652
1589	Blood-Cancer	GSE56315	GSM1358962	T	None	8.224
1590	Blood-Cancer	GSE56315	GSM1358963	T	None	8.05528
1591	Blood-Cancer	GSE56315	GSM1358964	T	None	7.75489
1592	Blood-Cancer	GSE56315	GSM1358965	T	None	7.53916
1593	Blood-Cancer	GSE56315	GSM1358966	T	None	7.56986
1594	Blood-Cancer	GSE56315	GSM1358967	T	None	7.76818
1595	Blood-Cancer	GSE56315	GSM1358968	T	None	7.77479
1596	Blood-Cancer	GSE56315	GSM1358969	T	None	6.80736
1597	Blood-Cancer	GSE56315	GSM1358970	T	None	7.75489
1598	Blood-Cancer	GSE56315	GSM1358971	T	None	7.83289
1599	Blood-Cancer	GSE56315	GSM1358972	T	None	7.01123
1600	Blood-Cancer	GSE56315	GSM1358973	T	None	7.45943
1601	Blood-Cancer	GSE56315	GSM1358974	T	None	7.82018
1602	Blood-Cancer	GSE56315	GSM1358975	T	None	7.62936
1603	Blood-Cancer	GSE56315	GSM1358976	T	None	7.40939
1604	Blood-Cancer	GSE56315	GSM1358977	T	None	7.59991
1605	Blood-Cancer	GSE56315	GSM1358978	T	None	7.6865
1606	Blood-Cancer	GSE56315	GSM1358979	T	None	7.98299
1607	Blood-Cancer	GSE56315	GSM1358980	T	None	7.64386
1608	Blood-Cancer	GSE56315	GSM1358981	T	None	7.06609
1609	Blood-Cancer	GSE56315	GSM1358982	T	None	7.61471
1610	Blood-Cancer	GSE56315	GSM1358983	T	None	7.55459
1611	Blood-Cancer	GSE56315	GSM1358984	T	None	8.15482
1612	Blood-Cancer	GSE56315	GSM1358985	T	None	7.64386
1613	Blood-Cancer	GSE56315	GSM1358986	T	None	7.90689
1614	Blood-Cancer	GSE56315	GSM1358987	T	None	7.86419
1615	Blood-Cancer	GSE56315	GSM1358988	T	None	7.11894
1616	Blood-Cancer	GSE56315	GSM1358989	T	None	7.48382
1617	Blood-Cancer	GSE56315	GSM1358990	T	None	7.58496
1618	Blood-Cancer	GSE56315	GSM1358991	T	None	8.19967
1619	Blood-Cancer	GSE56315	GSM1358992	T	None	8.224
1620	Blood-Cancer	GSE56315	GSM1358993	T	None	7.75489
1621	Blood-Cancer	GSE56315	GSM1358994	T	None	8.08215
1622	Blood-Cancer	GSE56315	GSM1358995	T	None	8.19476
1623	Blood-Cancer	GSE56315	GSM1358996	T	None	7.82655
1624	Blood-Cancer	GSE56315	GSM1358997	T	None	7.92481
1625	Blood-Cancer	GSE56315	GSM1358998	T	None	7.7879
1626	Blood-Cancer	GSE56315	GSM1358999	T	None	7.47573
1627	Blood-Cancer	GSE56315	GSM1359000	T	None	8.06609
1628	Blood-Cancer	GSE56315	GSM1359001	T	None	7.63663
1629	Blood-Cancer	GSE56315	GSM1359002	T	None	7.61471
1630	Blood-Cancer	GSE56315	GSM1359003	T	None	7.08746
1631	Blood-Cancer	GSE56315	GSM1359004	T	None	7.6865
1632	Blood-Cancer	GSE56315	GSM1359005	T	None	7.20945
1633	Blood-Cancer	GSE56315	GSM1359006	T	None	8.12412
1634	Blood-Cancer	GSE56315	GSM1359007	T	None	6.70044
1635	Blood-Cancer	GSE56315	GSM1359008	T	None	8.01123
1636	Blood-Cancer	GSE56315	GSM1359009	T	None	7.82655
1637	Blood-Cancer	GSE56315	GSM1359010	T	None	7.93074
1638	Blood-Cancer	GSE56315	GSM1359011	T	None	7.3837
1639	Blood-Cancer	GSE56315	GSM1359012	T	None	8.29462
1640	Blood-Cancer	GSE56315	GSM1359013	T	None	7.55459
1641	Blood-Cancer	GSE56315	GSM1359014	T	None	7.75489
1642	Blood-Cancer	GSE56315	GSM1359015	T	None	7.33092
1643	Blood-Cancer	GSE56315	GSM1359016	T	None	7.93664
1644	Blood-Cancer	GSE56315	GSM1359017	T	None	7.18982
1645	Blood-Cancer	GSE56315	GSM1359018	T	None	7.16993
1646	Blood-Cancer	GSE56315	GSM1359019	T	None	7.82018
1647	Blood-Cancer	GSE56315	GSM1359020	T	None	7.69349
1648	Blood-Cancer	GSE56315	GSM1359021	T	None	8.24793
1649	Blood-Cancer	GSE56315	GSM1359022	T	None	7.41785
1650	Blood-Cancer	GSE56315	GSM1359023	T	None	7.45121
1651	Blood-Cancer	GSE56315	GSM1359024	T	None	8.19476
1652	Blood-Cancer	GSE56315	GSM1359025	T	None	7.40939
1653	Blood-Cancer	GSE56315	GSM1359026	T	None	7.44294
1654	Blood-Cancer	GSE56315	GSM1359027	T	None	7.76818
1655	Blood-Cancer	GSE56449	GSM1361694	T	None	8.35315
1656	Blood-Cancer	GSE56449	GSM1361695	T	None	8.36632
1657	Blood-Cancer	GSE56449	GSM1361696	T	None	7.59991
1658	Blood-Cancer	GSE56449	GSM1361697	T	None	8.46353
1659	Blood-Cancer	GSE56449	GSM1361698	T	None	8.20457
1660	Blood-Cancer	GSE56449	GSM1361699	T	None	8.31288
1661	Blood-Cancer	GSE56449	GSM1361700	T	None	8.75489
1662	Blood-Cancer	GSE56449	GSM1361701	T	None	9.35094
1663	Blood-Cancer	GSE56449	GSM1361702	T	None	8.9571
1664	Blood-Cancer	GSE56449	GSM1361703	T	None	8.2854
1665	Blood-Cancer	GSE56449	GSM1361704	T	None	8.40514
1666	Blood-Cancer	GSE56449	GSM1361705	T	None	8.71081
1667	Blood-Cancer	GSE56449	GSM1361706	T	None	7.50779
1668	Blood-Cancer	GSE56449	GSM1361707	T	None	7.58496
1669	Blood-Cancer	GSE56449	GSM1361708	T	None	8.08746
1670	Blood-Cancer	GSE56449	GSM1361709	T	None	8.19967
1671	Blood-Cancer	GSE56449	GSM1361710	T	None	8.86419
1706	Blood-Cancer	GSE5900	GSM137167	T	None	8.46761
1707	Blood-Cancer	GSE5900	GSM137168	T	None	8.44708
1708	Blood-Cancer	GSE5900	GSM137169	T	None	8.21432
1709	Blood-Cancer	GSE5900	GSM137170	T	None	8.36632
1710	Blood-Cancer	GSE5900	GSM137171	T	None	8.15482
1711	Blood-Cancer	GSE5900	GSM137172	T	None	8.33092
1712	Blood-Cancer	GSE5900	GSM137173	T	None	8.224
1713	Blood-Cancer	GSE5900	GSM137174	T	None	8.72451
1714	Blood-Cancer	GSE5900	GSM137175	T	None	7.98299
1715	Blood-Cancer	GSE5900	GSM137176	T	None	9.01681
1716	Blood-Cancer	GSE5900	GSM137177	T	None	7.97154
1717	Blood-Cancer	GSE5900	GSM137178	T	None	8.31288
1718	Blood-Cancer	GSE5900	GSM137179	T	None	7.88874
1719	Blood-Cancer	GSE5900	GSM137180	T	None	8.45533
1720	Blood-Cancer	GSE5900	GSM137181	T	None	8.62936
1721	Blood-Cancer	GSE5900	GSM137182	T	None	8.25739
1722	Blood-Cancer	GSE5900	GSM137183	T	None	8.00563
1723	Blood-Cancer	GSE5900	GSM137184	T	None	8.35755
1724	Blood-Cancer	GSE5900	GSM137185	T	None	8.35755
1725	Blood-Cancer	GSE5900	GSM137186	T	None	8.17991
1726	Blood-Cancer	GSE5900	GSM137187	T	None	8.60363
1727	Blood-Cancer	GSE5900	GSM137188	T	None	8.56986
1728	Blood-Cancer	GSE5900	GSM137189	T	None	8.72451
1729	Blood-Cancer	GSE5900	GSM137190	T	None	8.31741
1730	Blood-Cancer	GSE5900	GSM137191	T	None	8.59246
1731	Blood-Cancer	GSE5900	GSM137192	T	None	8.77479
1732	Blood-Cancer	GSE5900	GSM137193	T	None	8.8009
1733	Blood-Cancer	GSE5900	GSM137194	T	None	8.84549
1734	Blood-Cancer	GSE5900	GSM137195	T	None	8.33092
1735	Blood-Cancer	GSE5900	GSM137196	T	None	8.27146
1736	Blood-Cancer	GSE5900	GSM137197	T	None	8.10852
1737	Blood-Cancer	GSE5900	GSM137198	T	None	8.26679
1738	Blood-Cancer	GSE5900	GSM137199	T	None	8.7211
1739	Blood-Cancer	GSE5900	GSM137200	T	None	9.09803
1740	Blood-Cancer	GSE5900	GSM137201	T	None	8.17991
1741	Blood-Cancer	GSE5900	GSM137202	T	None	8.35315
1742	Blood-Cancer	GSE5900	GSM137203	T	None	8.43045
1743	Blood-Cancer	GSE5900	GSM137204	T	None	8.11894
1744	Blood-Cancer	GSE5900	GSM137205	T	None	8.30378
1745	Blood-Cancer	GSE5900	GSM137206	T	None	8.46353
1746	Blood-Cancer	GSE5900	GSM137207	T	None	9.04166
1747	Blood-Cancer	GSE5900	GSM137208	T	None	8.41363
1748	Blood-Cancer	GSE5900	GSM137209	T	None	8.24793
1749	Blood-Cancer	GSE5900	GSM137210	T	None	8.85798
1750	Blood-Cancer	GSE5900	GSM137211	T	None	7.2854
1751	Blood-Cancer	GSE5900	GSM137212	T	None	8.47573
1752	Blood-Cancer	GSE5900	GSM137213	T	None	8.63662
1753	Blood-Cancer	GSE5900	GSM137214	T	None	8.75154
1754	Blood-Cancer	GSE5900	GSM137215	T	None	8.7039
1755	Blood-Cancer	GSE5900	GSM137216	T	None	8.70736
1756	Blood-Cancer	GSE5900	GSM137217	T	None	8.43879
1757	Blood-Cancer	GSE5900	GSM137218	T	None	8.43045
1758	Blood-Cancer	GSE5900	GSM137219	T	None	8.40939
1759	Blood-Cancer	GSE5900	GSM137220	T	None	8.56224
1760	Blood-Cancer	GSE5900	GSM137221	T	None	8.29462
1766	Blood-Cancer	GSE58133	GSM1401513	T	None	8.03342
1767	Blood-Cancer	GSE58133	GSM1401514	T	None	7.91886
1768	Blood-Cancer	GSE58133	GSM1401515	T	None	9.17243
1769	Blood-Cancer	GSE58133	GSM1401516	T	None	7.14975
1770	Blood-Cancer	GSE58133	GSM1401517	T	None	8.93369
1771	Blood-Cancer	GSE58133	GSM1401518	T	None	7.50779
1772	Blood-Cancer	GSE58133	GSM1401519	T	None	7.3837
1773	Blood-Cancer	GSE58133	GSM1401520	T	None	7.93664
1774	Blood-Cancer	GSE58133	GSM1401521	T	None	7.30378
1775	Blood-Cancer	GSE58133	GSM1401522	T	None	7.14975
1776	Blood-Cancer	GSE58133	GSM1401523	T	None	7.87652
1777	Blood-Cancer	GSE58133	GSM1401524	T	None	6.88264
1778	Blood-Cancer	GSE58133	GSM1401525	T	None	6.85798
1779	Blood-Cancer	GSE58133	GSM1401526	T	None	7.58496
1780	Blood-Cancer	GSE58133	GSM1401527	T	None	7.17991
1781	Blood-Cancer	GSE58133	GSM1401528	T	None	7.09803
1782	Blood-Cancer	GSE58133	GSM1401529	T	None	7.63663
1783	Blood-Cancer	GSE58133	GSM1401530	T	None	7.2854
1784	Blood-Cancer	GSE58133	GSM1401531	T	None	8.16491
1785	Blood-Cancer	GSE58133	GSM1401532	T	None	7.96
1786	Blood-Cancer	GSE58133	GSM1401533	T	None	8.47978
1787	Blood-Cancer	GSE58133	GSM1401534	T	None	7.55459
1788	Blood-Cancer	GSE58133	GSM1401535	T	None	6.75489
1789	Blood-Cancer	GSE58133	GSM1401536	T	None	8.48784
1790	Blood-Cancer	GSE58133	GSM1401537	T	None	7.29462
1791	Blood-Cancer	GSE58133	GSM1401538	T	None	8.75489
1792	Blood-Cancer	GSE58133	GSM1401539	T	None	6.39232
1793	Blood-Cancer	GSE58133	GSM1401540	T	None	7.35755
1794	Blood-Cancer	GSE58133	GSM1401541	T	None	7.36632
1795	Blood-Cancer	GSE58133	GSM1401542	T	None	6.9542
1796	Blood-Cancer	GSE58133	GSM1401543	T	None	7.10852
1797	Blood-Cancer	GSE58133	GSM1401544	T	None	8.03892
1798	Blood-Cancer	GSE58133	GSM1401545	T	None	7.5157
1799	Blood-Cancer	GSE58133	GSM1401546	T	None	8.65105
1800	Blood-Cancer	GSE58133	GSM1401547	T	None	6.6865
1801	Blood-Cancer	GSE58133	GSM1401548	T	None	6.64386
1802	Blood-Cancer	GSE58133	GSM1401549	T	None	7.98868
1803	Blood-Cancer	GSE58133	GSM1401550	T	None	7.86419
1804	Blood-Cancer	GSE58133	GSM1401551	T	None	7.81378
1805	Blood-Cancer	GSE58133	GSM1401552	T	None	8.97728
1806	Blood-Cancer	GSE58133	GSM1401553	T	None	7.16993
1807	Blood-Cancer	GSE58133	GSM1401554	T	None	8.14466
1808	Blood-Cancer	GSE58133	GSM1401555	T	None	6.72792
1809	Blood-Cancer	GSE58133	GSM1401556	T	None	7.18982
1810	Blood-Cancer	GSE58133	GSM1401557	T	None	6.76818
1811	Blood-Cancer	GSE58133	GSM1401558	T	None	6.14975
1812	Blood-Cancer	GSE58133	GSM1401559	T	None	8.27612
1813	Blood-Cancer	GSE58133	GSM1401560	T	None	8.42206
1814	Blood-Cancer	GSE58133	GSM1401561	T	None	8.63662
1815	Blood-Cancer	GSE58133	GSM1401562	T	None	6.97728
1816	Blood-Cancer	GSE58133	GSM1401563	T	None	7.47573
1817	Blood-Cancer	GSE58133	GSM1401564	T	None	7.49185
1818	Blood-Cancer	GSE58133	GSM1401565	T	None	6.97728
1819	Blood-Cancer	GSE58133	GSM1401566	T	None	6.93074
1820	Blood-Cancer	GSE58133	GSM1401567	T	None	8.08215
1821	Blood-Cancer	GSE58133	GSM1401568	T	None	7.44294
1822	Blood-Cancer	GSE58133	GSM1401569	T	None	8.10852
1823	Blood-Cancer	GSE58133	GSM1401570	T	None	7.75489
1824	Blood-Cancer	GSE58133	GSM1401571	T	None	7.24793
1825	Blood-Cancer	GSE58133	GSM1401572	T	None	8.30834
1826	Blood-Cancer	GSE58133	GSM1401573	T	None	8.32643
1827	Blood-Cancer	GSE58133	GSM1401574	T	None	7.69349
1828	Blood-Cancer	GSE58133	GSM1401575	T	None	9.48382
1829	Blood-Cancer	GSE58133	GSM1401576	T	None	7.19967
1830	Blood-Cancer	GSE58133	GSM1401577	T	None	7.48382
1831	Blood-Cancer	GSE58133	GSM1401578	T	None	8.91289
1832	Blood-Cancer	GSE58133	GSM1401579	T	None	7.49985
1833	Blood-Cancer	GSE58133	GSM1401580	T	None	7.52356
1834	Blood-Cancer	GSE58133	GSM1401581	T	None	7.59991
1835	Blood-Cancer	GSE58133	GSM1401582	T	None	6.56986
1836	Blood-Cancer	GSE58133	GSM1401583	T	None	9.31741
1837	Blood-Cancer	GSE58133	GSM1401584	T	None	7.71425
1838	Blood-Cancer	GSE58133	GSM1401585	T	None	6.9542
1839	Blood-Cancer	GSE58133	GSM1401586	T	None	8.12928
1840	Blood-Cancer	GSE58133	GSM1401587	T	None	7.91886
1841	Blood-Cancer	GSE58133	GSM1401588	T	None	7.35755
1842	Blood-Cancer	GSE58133	GSM1401589	T	None	7.82655
1843	Blood-Cancer	GSE58133	GSM1401590	T	None	7.97728
1844	Blood-Cancer	GSE58133	GSM1401591	T	None	7.65821
1845	Blood-Cancer	GSE58133	GSM1401592	T	None	9.72281
1846	Blood-Cancer	GSE58133	GSM1401593	T	None	9.05799
1847	Blood-Cancer	GSE58133	GSM1401594	T	None	7.75489
1848	Blood-Cancer	GSE58133	GSM1401595	T	None	8.3966
1849	Blood-Cancer	GSE58133	GSM1401596	T	None	7.11894
1850	Blood-Cancer	GSE58133	GSM1401597	T	None	8.05528
1851	Blood-Cancer	GSE58133	GSM1401598	T	None	8.47978
1852	Blood-Cancer	GSE58133	GSM1401599	T	None	8.10852
1853	Blood-Cancer	GSE58133	GSM1401600	T	None	7.48382
1854	Blood-Cancer	GSE58133	GSM1401601	T	None	8.18488
1855	Blood-Cancer	GSE58133	GSM1401602	T	None	7.65821
1856	Blood-Cancer	GSE58133	GSM1401603	T	None	8.77149
1857	Blood-Cancer	GSE58133	GSM1401604	T	None	7.45943
1858	Blood-Cancer	GSE58133	GSM1401605	T	None	7.14975
1859	Blood-Cancer	GSE58133	GSM1401606	T	None	7.52356
1860	Blood-Cancer	GSE58133	GSM1401607	T	None	7.08746
1861	Blood-Cancer	GSE58133	GSM1401608	T	None	8.76819
1862	Blood-Cancer	GSE58133	GSM1401609	T	None	7.08746
1863	Blood-Cancer	GSE58133	GSM1401610	T	None	7.70736
1864	Blood-Cancer	GSE58133	GSM1401611	T	None	8.3443
1865	Blood-Cancer	GSE58133	GSM1401612	T	None	7.32193
1866	Blood-Cancer	GSE58133	GSM1401613	T	None	9.07414
1867	Blood-Cancer	GSE58133	GSM1401614	T	None	8.53916
1868	Blood-Cancer	GSE58133	GSM1401615	T	None	8.91588
1869	Blood-Cancer	GSE58133	GSM1401616	T	None	7.72792
1870	Blood-Cancer	GSE58133	GSM1401617	T	None	9.04439
1871	Blood-Cancer	GSE58133	GSM1401618	T	None	8.58496
1872	Blood-Cancer	GSE58133	GSM1401619	T	None	7.65821
1873	Blood-Cancer	GSE58133	GSM1401620	T	None	7.91289
1874	Blood-Cancer	GSE58133	GSM1401621	T	None	7.70736
1875	Blood-Cancer	GSE58133	GSM1401622	T	None	8.13443
1876	Blood-Cancer	GSE58133	GSM1401623	T	None	8.3837
1877	Blood-Cancer	GSE58133	GSM1401624	T	None	8.57365
1878	Blood-Cancer	GSE58133	GSM1401625	T	None	8.11374
1879	Blood-Cancer	GSE58133	GSM1401626	T	None	9.18982
1880	Blood-Cancer	GSE58133	GSM1401627	T	None	8.27612
1881	Blood-Cancer	GSE58133	GSM1401628	T	None	10.8642
1882	Blood-Cancer	GSE58133	GSM1401629	T	None	8.40939
1883	Blood-Cancer	GSE58133	GSM1401630	T	None	8.83605
1884	Blood-Cancer	GSE58133	GSM1401631	T	None	7.53138
1885	Blood-Cancer	GSE58133	GSM1401632	T	None	7.92481
1886	Blood-Cancer	GSE58445	GSM1411273	T	None	8.07682
1887	Blood-Cancer	GSE58445	GSM1411274	T	None	8.27612
1888	Blood-Cancer	GSE58445	GSM1411275	T	None	7.09803
1889	Blood-Cancer	GSE58445	GSM1411276	T	None	7.72792
1890	Blood-Cancer	GSE58445	GSM1411277	T	None	8.05528
1891	Blood-Cancer	GSE58445	GSM1411278	T	None	7.8392
1892	Blood-Cancer	GSE58445	GSM1411279	T	None	8.10852
1893	Blood-Cancer	GSE58445	GSM1411280	T	None	8.17991
1894	Blood-Cancer	GSE58445	GSM1411281	T	None	7.71425
1895	Blood-Cancer	GSE58445	GSM1411282	T	None	7.25739
1896	Blood-Cancer	GSE58445	GSM1411283	T	None	8.45943
1897	Blood-Cancer	GSE58445	GSM1411284	T	None	9.04712
1898	Blood-Cancer	GSE58445	GSM1411285	T	None	7.93664
1899	Blood-Cancer	GSE58445	GSM1411286	T	None	8.16992
1900	Blood-Cancer	GSE58445	GSM1411287	T	None	7.96
1901	Blood-Cancer	GSE58445	GSM1411288	T	None	7.76155
1902	Blood-Cancer	GSE58445	GSM1411289	T	None	8.22882
1903	Blood-Cancer	GSE58445	GSM1411290	T	None	7.86419
1904	Blood-Cancer	GSE58445	GSM1411291	T	None	7.13955
1905	Blood-Cancer	GSE58445	GSM1411292	T	None	7.56224
1906	Blood-Cancer	GSE58445	GSM1411293	T	None	7.60733
1907	Blood-Cancer	GSE58445	GSM1411294	T	None	8.08215
1908	Blood-Cancer	GSE58445	GSM1411295	T	None	7.80736
1909	Blood-Cancer	GSE58445	GSM1411296	T	None	7.76818
1910	Blood-Cancer	GSE58445	GSM1411297	T	None	7.55459
1911	Blood-Cancer	GSE58445	GSM1411298	T	None	7.75489
1912	Blood-Cancer	GSE58445	GSM1411299	T	None	8.11374
1913	Blood-Cancer	GSE58445	GSM1411300	T	None	8.09803
1914	Blood-Cancer	GSE58445	GSM1411301	T	None	7.83289
1915	Blood-Cancer	GSE58445	GSM1411302	T	None	8.07146
1916	Blood-Cancer	GSE58445	GSM1411303	T	None	7.54689
1917	Blood-Cancer	GSE58445	GSM1411304	T	None	8.25267
1918	Blood-Cancer	GSE58445	GSM1411305	T	None	8.10852
1919	Blood-Cancer	GSE58445	GSM1411306	T	None	8.14466
1920	Blood-Cancer	GSE58445	GSM1411307	T	None	8.33985
1921	Blood-Cancer	GSE58445	GSM1411308	T	None	7.66534
1922	Blood-Cancer	GSE58445	GSM1411309	T	None	8.45943
1923	Blood-Cancer	GSE58445	GSM1411310	T	None	7.72792
1924	Blood-Cancer	GSE58445	GSM1411311	T	None	7.76818
1925	Blood-Cancer	GSE58445	GSM1411312	T	None	7.21917
1926	Blood-Cancer	GSE58445	GSM1411313	T	None	7.94251
1927	Blood-Cancer	GSE58445	GSM1411314	T	None	8.16491
1928	Blood-Cancer	GSE58445	GSM1411315	T	None	8.48382
1929	Blood-Cancer	GSE58445	GSM1411316	T	None	7.56224
1930	Blood-Cancer	GSE58445	GSM1411317	T	None	7.59991
1931	Blood-Cancer	GSE58445	GSM1411318	T	None	8.09803
1932	Blood-Cancer	GSE58445	GSM1411319	T	None	8.60733
1933	Blood-Cancer	GSE58445	GSM1411320	T	None	7.86419
1934	Blood-Cancer	GSE58445	GSM1411321	T	None	6.56986
1935	Blood-Cancer	GSE58445	GSM1411322	T	None	7.26679
1936	Blood-Cancer	GSE58445	GSM1411323	T	None	7.9542
1937	Blood-Cancer	GSE58445	GSM1411324	T	None	7.24793
1938	Blood-Cancer	GSE58445	GSM1411325	T	None	8.54303
1939	Blood-Cancer	GSE58445	GSM1411326	T	None	7.44294
1940	Blood-Cancer	GSE58445	GSM1411327	T	None	7.33985
1941	Blood-Cancer	GSE58445	GSM1411328	T	None	6.32193
1942	Blood-Cancer	GSE58445	GSM1411329	T	None	7.63663
1943	Blood-Cancer	GSE58445	GSM1411330	T	None	7.13955
1944	Blood-Cancer	GSE58445	GSM1411331	T	None	8.49985
1945	Blood-Cancer	GSE58445	GSM1411332	T	None	7.63663
1946	Blood-Cancer	GSE58445	GSM1411333	T	None	7.37504
1947	Blood-Cancer	GSE58445	GSM1411334	T	None	6.94251
1948	Blood-Cancer	GSE58445	GSM1411335	T	None	7.16993
1949	Blood-Cancer	GSE58445	GSM1411336	T	None	7.8009
1950	Blood-Cancer	GSE58445	GSM1411337	T	None	8.31741
1951	Blood-Cancer	GSE58445	GSM1411338	T	None	6.53916
1952	Blood-Cancer	GSE58445	GSM1411339	T	None	7.45121
1953	Blood-Cancer	GSE58445	GSM1411340	T	None	8.40514
1954	Blood-Cancer	GSE58445	GSM1411341	T	None	7.6865
1955	Blood-Cancer	GSE58445	GSM1411342	T	None	7.91886
1956	Blood-Cancer	GSE58445	GSM1411343	T	None	7.64386
1957	Blood-Cancer	GSE58445	GSM1411344	T	None	7.46761
1958	Blood-Cancer	GSE58445	GSM1411345	T	None	8.22882
1959	Blood-Cancer	GSE58445	GSM1411346	T	None	8.04439
1960	Blood-Cancer	GSE58445	GSM1411347	T	None	7.20945
1961	Blood-Cancer	GSE58445	GSM1411348	T	None	7.98299
1962	Blood-Cancer	GSE58445	GSM1411349	T	None	7.31288
1963	Blood-Cancer	GSE58445	GSM1411350	T	None	7.8009
1964	Blood-Cancer	GSE58445	GSM1411351	T	None	6.06609
1965	Blood-Cancer	GSE58445	GSM1411352	T	None	8.04439
1966	Blood-Cancer	GSE58445	GSM1411353	T	None	7.45943
1967	Blood-Cancer	GSE58445	GSM1411354	T	None	6.59991
1968	Blood-Cancer	GSE58445	GSM1411355	T	None	7.64386
1969	Blood-Cancer	GSE58445	GSM1411356	T	None	7.86419
1970	Blood-Cancer	GSE58445	GSM1411357	T	None	8.04439
1971	Blood-Cancer	GSE58445	GSM1411358	T	None	7.2854
1972	Blood-Cancer	GSE58445	GSM1411359	T	None	8.43463
1973	Blood-Cancer	GSE58445	GSM1411360	T	None	7.89482
1974	Blood-Cancer	GSE58445	GSM1411361	T	None	7.31288
1975	Blood-Cancer	GSE58445	GSM1411362	T	None	7.5157
1976	Blood-Cancer	GSE58445	GSM1411363	T	None	7.71425
1977	Blood-Cancer	GSE58445	GSM1411364	T	None	7.85175
1978	Blood-Cancer	GSE58445	GSM1411365	T	None	7.53138
1979	Blood-Cancer	GSE58445	GSM1411366	T	None	7.22882
1980	Blood-Cancer	GSE58445	GSM1411367	T	None	8.06609
1981	Blood-Cancer	GSE58445	GSM1411368	T	None	7.49985
1982	Blood-Cancer	GSE58445	GSM1411369	T	None	7.2384
1983	Blood-Cancer	GSE58445	GSM1411370	T	None	7.46761
1984	Blood-Cancer	GSE58445	GSM1411371	T	None	7.44294
1985	Blood-Cancer	GSE58445	GSM1411372	T	None	7.21917
1986	Blood-Cancer	GSE58445	GSM1411373	T	None	8.26209
1987	Blood-Cancer	GSE58445	GSM1411374	T	None	8.04985
1988	Blood-Cancer	GSE58445	GSM1411375	T	None	6.89482
1989	Blood-Cancer	GSE58445	GSM1411376	T	None	7.13955
1990	Blood-Cancer	GSE58445	GSM1411377	T	None	8.33539
1991	Blood-Cancer	GSE58445	GSM1411378	T	None	8.14975
1992	Blood-Cancer	GSE58445	GSM1411379	T	None	7.54689
1993	Blood-Cancer	GSE58445	GSM1411380	T	None	7.25739
1994	Blood-Cancer	GSE58445	GSM1411381	T	None	7.66534
1995	Blood-Cancer	GSE58445	GSM1411382	T	None	8.80413
1996	Blood-Cancer	GSE58445	GSM1411383	T	None	8.01123
1997	Blood-Cancer	GSE58445	GSM1411384	T	None	7.57743
1998	Blood-Cancer	GSE58445	GSM1411385	T	None	7.82655
1999	Blood-Cancer	GSE58445	GSM1411386	T	None	8.69697
2000	Blood-Cancer	GSE58445	GSM1411387	T	None	7.70044
2001	Blood-Cancer	GSE58445	GSM1411388	T	None	8.09803
2002	Blood-Cancer	GSE58445	GSM1411389	T	None	7.5157
2003	Blood-Cancer	GSE58445	GSM1411390	T	None	7.80736
2004	Blood-Cancer	GSE58445	GSM1411391	T	None	9.12412
2005	Blood-Cancer	GSE58445	GSM1411392	T	None	7.81378
2006	Blood-Cancer	GSE58445	GSM1411393	T	None	8.11374
2007	Blood-Cancer	GSE58445	GSM1411394	T	None	7.57743
2008	Blood-Cancer	GSE58445	GSM1411395	T	None	7.31288
2009	Blood-Cancer	GSE58445	GSM1411396	T	None	7.39232
2010	Blood-Cancer	GSE58445	GSM1411397	T	None	8.17991
2011	Blood-Cancer	GSE58445	GSM1411398	T	None	8.30834
2012	Blood-Cancer	GSE58445	GSM1411399	T	None	8.49985
2013	Blood-Cancer	GSE58445	GSM1411400	T	None	8.06609
2014	Blood-Cancer	GSE58445	GSM1411401	T	None	7.56986
2015	Blood-Cancer	GSE58445	GSM1411402	T	None	8.22882
2016	Blood-Cancer	GSE58445	GSM1411403	T	None	8.24793
2017	Blood-Cancer	GSE58445	GSM1411404	T	None	7.57743
2018	Blood-Cancer	GSE58445	GSM1411405	T	None	9.30834
2019	Blood-Cancer	GSE58445	GSM1411406	T	None	7.89482
2020	Blood-Cancer	GSE58445	GSM1411407	T	None	8.21917
2021	Blood-Cancer	GSE58445	GSM1411408	T	None	8.24317
2022	Blood-Cancer	GSE58445	GSM1411409	T	None	8.45943
2023	Blood-Cancer	GSE58445	GSM1411410	T	None	7.94251
2024	Blood-Cancer	GSE58445	GSM1411411	T	None	8.08746
2025	Blood-Cancer	GSE58445	GSM1411412	T	None	8.29002
2026	Blood-Cancer	GSE58445	GSM1411413	T	None	8.45943
2027	Blood-Cancer	GSE58445	GSM1411414	T	None	8.75822
2028	Blood-Cancer	GSE58445	GSM1411415	T	None	7.8009
2029	Blood-Cancer	GSE58445	GSM1411416	T	None	8.11374
2030	Blood-Cancer	GSE58445	GSM1411417	T	None	8.75489
2031	Blood-Cancer	GSE58445	GSM1411418	T	None	8.3443
2032	Blood-Cancer	GSE58445	GSM1411419	T	None	8.51964
2033	Blood-Cancer	GSE58445	GSM1411420	T	None	8.81057
2034	Blood-Cancer	GSE58445	GSM1411421	T	None	8.08215
2035	Blood-Cancer	GSE58445	GSM1411422	T	None	8.35315
2036	Blood-Cancer	GSE58445	GSM1411423	T	None	7.53916
2037	Blood-Cancer	GSE58445	GSM1411424	T	None	7.72792
2038	Blood-Cancer	GSE58445	GSM1411425	T	None	7.86419
2039	Blood-Cancer	GSE58445	GSM1411426	T	None	7.87652
2040	Blood-Cancer	GSE58445	GSM1411427	T	None	7.99435
2041	Blood-Cancer	GSE58445	GSM1411428	T	None	7.59246
2042	Blood-Cancer	GSE58445	GSM1411429	T	None	7.74819
2043	Blood-Cancer	GSE58445	GSM1411430	T	None	8.17991
2044	Blood-Cancer	GSE58445	GSM1411431	T	None	7.64386
2045	Blood-Cancer	GSE58445	GSM1411432	T	None	7.82655
2046	Blood-Cancer	GSE58445	GSM1411433	T	None	7.75489
2047	Blood-Cancer	GSE58445	GSM1411434	T	None	6.91886
2048	Blood-Cancer	GSE58445	GSM1411435	T	None	7.7879
2049	Blood-Cancer	GSE58445	GSM1411436	T	None	8.21432
2050	Blood-Cancer	GSE58445	GSM1411437	T	None	8.35315
2051	Blood-Cancer	GSE58445	GSM1411438	T	None	8.23362
2052	Blood-Cancer	GSE58445	GSM1411439	T	None	7.78136
2053	Blood-Cancer	GSE58445	GSM1411440	T	None	8.32643
2054	Blood-Cancer	GSE58445	GSM1411441	T	None	7.18982
2055	Blood-Cancer	GSE58445	GSM1411442	T	None	7.67243
2056	Blood-Cancer	GSE58445	GSM1411443	T	None	7.31288
2057	Blood-Cancer	GSE58445	GSM1411444	T	None	7.7211
2058	Blood-Cancer	GSE58445	GSM1411445	T	None	7.94837
2059	Blood-Cancer	GSE58445	GSM1411446	T	None	7.61471
2060	Blood-Cancer	GSE58445	GSM1411447	T	None	7.7211
2061	Blood-Cancer	GSE58445	GSM1411448	T	None	7.90689
2062	Blood-Cancer	GSE58445	GSM1411449	T	None	8.11374
2063	Blood-Cancer	GSE58445	GSM1411450	T	None	8.64746
2064	Blood-Cancer	GSE58445	GSM1411451	T	None	7.85175
2065	Blood-Cancer	GSE58445	GSM1411452	T	None	8.24317
2066	Blood-Cancer	GSE58445	GSM1411453	T	None	8.00563
2067	Blood-Cancer	GSE58445	GSM1411454	T	None	7.74147
2068	Blood-Cancer	GSE58445	GSM1411455	T	None	7.37504
2069	Blood-Cancer	GSE58445	GSM1411456	T	None	7.90689
2070	Blood-Cancer	GSE58445	GSM1411457	T	None	8.08746
2071	Blood-Cancer	GSE58445	GSM1411458	T	None	7.90087
2072	Blood-Cancer	GSE58445	GSM1411459	T	None	8.84235
2073	Blood-Cancer	GSE58445	GSM1411460	T	None	7.42626
2074	Blood-Cancer	GSE58445	GSM1411461	T	None	7.76155
2075	Blood-Cancer	GSE58445	GSM1411462	T	None	7.59991
2076	Blood-Cancer	GSE58445	GSM1411463	T	None	7.96
2077	Blood-Cancer	GSE58445	GSM1411464	T	None	7.67243
2078	Blood-Cancer	GSE58445	GSM1411465	T	None	7.93664
2079	Blood-Cancer	GSE58565	GSM1414207	T	None	9.27612
2080	Blood-Cancer	GSE58565	GSM1414208	T	None	8.37504
2081	Blood-Cancer	GSE58565	GSM1414209	T	None	8.28077
2082	Blood-Cancer	GSE58565	GSM1414210	T	None	7.56224
2083	Blood-Cancer	GSE58565	GSM1414211	T	None	8.03892
2084	Blood-Cancer	GSE58565	GSM1414212	T	None	7.3837
2085	Blood-Cancer	GSE58565	GSM1414213	T	None	7.98868
2086	Blood-Cancer	GSE58565	GSM1414214	T	None	8.10329
2087	Blood-Cancer	GSE58565	GSM1414215	T	None	8.36194
2088	Blood-Cancer	GSE58565	GSM1414216	T	None	7.91886
2089	Blood-Cancer	GSE58565	GSM1414217	T	None	7.96578
2090	Blood-Cancer	GSE58565	GSM1414218	T	None	7.30378
2091	Blood-Cancer	GSE58565	GSM1414219	T	None	6.33985
2092	Blood-Cancer	GSE58565	GSM1414220	T	None	8.36632
2093	Blood-Cancer	GSE58565	GSM1414221	T	None	8.32643
2094	Blood-Cancer	GSE58565	GSM1414222	T	None	10.1189
2095	Blood-Cancer	GSE58565	GSM1414223	T	None	9.17991
2096	Blood-Cancer	GSE58831	GSM1420552	T	None	8.44294
2097	Blood-Cancer	GSE58831	GSM1420554	T	None	8.43879
2098	Blood-Cancer	GSE58831	GSM1420555	T	None	8.33539
2099	Blood-Cancer	GSE58831	GSM1420556	T	None	7.90689
2100	Blood-Cancer	GSE58831	GSM1420557	T	None	7.77479
2101	Blood-Cancer	GSE58831	GSM1420558	T	None	8.18982
2102	Blood-Cancer	GSE58831	GSM1420559	T	None	7.7879
2103	Blood-Cancer	GSE58831	GSM1420560	T	None	7.55459
2104	Blood-Cancer	GSE58831	GSM1420561	T	None	7.2384
2105	Blood-Cancer	GSE58831	GSM1420562	T	None	7.2854
2106	Blood-Cancer	GSE58831	GSM1420563	T	None	7.18982
2107	Blood-Cancer	GSE58831	GSM1420564	T	None	7.91886
2108	Blood-Cancer	GSE58831	GSM1420565	T	None	7.6865
2109	Blood-Cancer	GSE58831	GSM1420566	T	None	7.97154
2110	Blood-Cancer	GSE58831	GSM1420567	T	None	7.74147
2111	Blood-Cancer	GSE58831	GSM1420568	T	None	7.76155
2112	Blood-Cancer	GSE59307	GSM1434743	T	None	7.7211
2113	Blood-Cancer	GSE59307	GSM1434744	T	None	7.7879
2114	Blood-Cancer	GSE59307	GSM1434745	T	None	7.7879
2115	Blood-Cancer	GSE59307	GSM1434746	T	None	7.99435
2116	Blood-Cancer	GSE59307	GSM1434747	T	None	7.96578
2117	Blood-Cancer	GSE59307	GSM1434748	T	None	7.43463
2118	Blood-Cancer	GSE59307	GSM1434749	T	None	8.30834
2119	Blood-Cancer	GSE59307	GSM1434750	T	None	8.45533
2120	Blood-Cancer	GSE59307	GSM1434751	T	None	5.72792
2121	Blood-Cancer	GSE59307	GSM1434752	T	None	7.69349
2122	Blood-Cancer	GSE59307	GSM1434753	T	None	8.13443
2123	Blood-Cancer	GSE59307	GSM1434754	T	None	8.00563
2124	Blood-Cancer	GSE59307	GSM1434755	T	None	8.13955
2125	Blood-Cancer	GSE59307	GSM1434756	T	None	7.9542
2158	Blood-Cancer	GSE6338	GSM146142	T	None	7.20945
2159	Blood-Cancer	GSE6338	GSM146143	T	None	7.97728
2160	Blood-Cancer	GSE6338	GSM146144	T	None	7.98868
2161	Blood-Cancer	GSE6338	GSM146145	T	None	7.77479
2162	Blood-Cancer	GSE6338	GSM146146	T	None	7.80736
2163	Blood-Cancer	GSE6338	GSM146147	T	None	8.41785
2164	Blood-Cancer	GSE6338	GSM146148	T	None	8.25739
2165	Blood-Cancer	GSE6338	GSM146149	T	None	8.633
2166	Blood-Cancer	GSE6338	GSM146150	T	None	8.21432
2167	Blood-Cancer	GSE6338	GSM146151	T	None	7.87036
2168	Blood-Cancer	GSE6338	GSM146152	T	None	7.98868
2169	Blood-Cancer	GSE6338	GSM146153	T	None	8.37504
2170	Blood-Cancer	GSE6338	GSM146154	T	None	8.12928
2171	Blood-Cancer	GSE6338	GSM146155	T	None	8.16992
2172	Blood-Cancer	GSE6338	GSM146156	T	None	7.99435
2173	Blood-Cancer	GSE6338	GSM146157	T	None	8.89482
2174	Blood-Cancer	GSE6338	GSM146158	T	None	8.04985
2175	Blood-Cancer	GSE6338	GSM146159	T	None	7.60733
2176	Blood-Cancer	GSE6338	GSM146160	T	None	7.8392
2177	Blood-Cancer	GSE6338	GSM146161	T	None	7.82018
2178	Blood-Cancer	GSE6338	GSM146162	T	None	7.99435
2179	Blood-Cancer	GSE6338	GSM146163	T	None	7.70736
2180	Blood-Cancer	GSE6338	GSM146164	T	None	7.97728
2181	Blood-Cancer	GSE6338	GSM146165	T	None	7.7879
2182	Blood-Cancer	GSE6338	GSM146166	T	None	8.71768
2183	Blood-Cancer	GSE6338	GSM146167	T	None	8.44294
2184	Blood-Cancer	GSE6338	GSM146168	T	None	8.16491
2185	Blood-Cancer	GSE6338	GSM146169	T	None	8.36632
2186	Blood-Cancer	GSE6338	GSM146170	T	None	7.97154
2187	Blood-Cancer	GSE6338	GSM146171	T	None	8.16992
2188	Blood-Cancer	GSE6338	GSM146172	T	None	8.42627
2189	Blood-Cancer	GSE6338	GSM146173	T	None	8.16491
2190	Blood-Cancer	GSE6338	GSM146174	T	None	8.36632
2191	Blood-Cancer	GSE6338	GSM146175	T	None	7.74819
2192	Blood-Cancer	GSE6338	GSM146176	T	None	8.32643
2193	Blood-Cancer	GSE6338	GSM146177	T	None	7.87652
2194	Blood-Cancer	GSE6338	GSM146178	T	None	8.79442
2195	Blood-Cancer	GSE6338	GSM146179	T	None	7.37504
2196	Blood-Cancer	GSE6338	GSM146180	T	None	8.08215
2197	Blood-Cancer	GSE6338	GSM146181	T	None	8.61838
2198	Blood-Cancer	GSE6338	GSM146182	T	None	8.10852
2199	Blood-Cancer	GSE60327	GSM1471688	T	None	8.53916
2200	Blood-Cancer	GSE60327	GSM1471690	T	None	9.46557
2201	Blood-Cancer	GSE60926	GSM1493736	T	None	8.3966
2202	Blood-Cancer	GSE60926	GSM1493737	T	None	6.93074
2203	Blood-Cancer	GSE60926	GSM1493738	T	None	8.11374
2204	Blood-Cancer	GSE60926	GSM1493739	T	None	8.55459
2205	Blood-Cancer	GSE60926	GSM1493740	T	None	7.98299
2206	Blood-Cancer	GSE60926	GSM1493741	T	None	7.30378
2207	Blood-Cancer	GSE60926	GSM1493742	T	None	8.33985
2208	Blood-Cancer	GSE60926	GSM1493743	T	None	6.90689
2209	Blood-Cancer	GSE60926	GSM1493744	T	None	7.90689
2210	Blood-Cancer	GSE60926	GSM1493745	T	None	7.88264
2211	Blood-Cancer	GSE60926	GSM1493746	T	None	7.41785
2212	Blood-Cancer	GSE60926	GSM1493747	T	None	7.07682
2213	Blood-Cancer	GSE60926	GSM1493748	T	None	7.74819
2214	Blood-Cancer	GSE60926	GSM1493749	T	None	6.55459
2215	Blood-Cancer	GSE60926	GSM1493750	T	None	7.33985
2216	Blood-Cancer	GSE60926	GSM1493751	T	None	6.35755
2217	Blood-Cancer	GSE60926	GSM1493752	T	None	7.42626
2218	Blood-Cancer	GSE60926	GSM1493753	T	None	6.20945
2219	Blood-Cancer	GSE60926	GSM1493754	T	None	8.13443
2220	Blood-Cancer	GSE60926	GSM1493755	T	None	7.10852
2221	Blood-Cancer	GSE60926	GSM1493756	T	None	7.94837
2222	Blood-Cancer	GSE60926	GSM1493757	T	None	7.41785
2223	Blood-Cancer	GSE60926	GSM1493758	T	None	8.15482
2224	Blood-Cancer	GSE60926	GSM1493759	T	None	7.43463
2225	Blood-Cancer	GSE60926	GSM1493760	T	None	6.97728
2226	Blood-Cancer	GSE60926	GSM1493761	T	None	8.37069
2227	Blood-Cancer	GSE60926	GSM1493762	T	None	8.18488
2228	Blood-Cancer	GSE60926	GSM1493763	T	None	7.24793
2229	Blood-Cancer	GSE60926	GSM1493764	T	None	8.67596
2230	Blood-Cancer	GSE60926	GSM1493765	T	None	7.31288
2231	Blood-Cancer	GSE60926	GSM1493766	T	None	8.56605
2232	Blood-Cancer	GSE60926	GSM1493767	T	None	7.96
2233	Blood-Cancer	GSE60926	GSM1493768	T	None	6.9542
2234	Blood-Cancer	GSE60926	GSM1493769	T	None	8.08746
2235	Blood-Cancer	GSE60926	GSM1493770	T	None	8.30378
2236	Blood-Cancer	GSE60926	GSM1493771	T	None	6.64386
2237	Blood-Cancer	GSE60926	GSM1493772	T	None	7.55459
2238	Blood-Cancer	GSE60926	GSM1493773	T	None	7.44294
2239	Blood-Cancer	GSE60926	GSM1493774	T	None	7.33092
2240	Blood-Cancer	GSE60926	GSM1493775	T	None	6.89482
2241	Blood-Cancer	GSE60926	GSM1493776	T	None	7.75489
2242	Blood-Cancer	GSE60926	GSM1493777	T	None	8.03892
2243	Blood-Cancer	GSE60926	GSM1493778	T	None	7.47573
2244	Blood-Cancer	GSE60926	GSM1493779	T	None	7.48382
2245	Blood-Cancer	GSE60926	GSM1493780	T	None	7.53916
2246	Blood-Cancer	GSE60926	GSM1493781	T	None	8.21917
2247	Blood-Cancer	GSE60926	GSM1493782	T	None	7.48382
2248	Blood-Cancer	GSE60926	GSM1493783	T	None	7.80736
2249	Blood-Cancer	GSE60926	GSM1493784	T	None	7.78136
2250	Blood-Cancer	GSE60926	GSM1493785	T	None	7.90689
2251	Blood-Cancer	GSE61275	GSM1501287	T	None	7.49985
2253	Blood-Cancer	GSE61578	GSM1508700	T	None	8.05528
2254	Blood-Cancer	GSE61578	GSM1508703	T	None	7.59246
2255	Blood-Cancer	GSE61578	GSM1508705	T	None	5.67243
2256	Blood-Cancer	GSE61578	GSM1508706	T	None	6.88264
2257	Blood-Cancer	GSE61578	GSM1508707	T	None	7.39232
2258	Blood-Cancer	GSE61578	GSM1508729	T	None	5.58496
2259	Blood-Cancer	GSE61578	GSM1508730	T	None	8.96
2260	Blood-Cancer	GSE61578	GSM1508731	T	None	7.02237
2261	Blood-Cancer	GSE61578	GSM1508732	T	None	8.04439
2262	Blood-Cancer	GSE61578	GSM1508733	T	None	8.40514
2263	Blood-Cancer	GSE61578	GSM1508734	T	None	7.96578
2264	Blood-Cancer	GSE61804	GSM1514033	T	None	8.71081
2265	Blood-Cancer	GSE61804	GSM1514034	T	None	8.27146
2266	Blood-Cancer	GSE61804	GSM1514035	T	None	8.2384
2267	Blood-Cancer	GSE61804	GSM1514036	T	None	9.15735
2268	Blood-Cancer	GSE61804	GSM1514037	T	None	9.15987
2269	Blood-Cancer	GSE61804	GSM1514038	T	None	8.71425
2270	Blood-Cancer	GSE61804	GSM1514039	T	None	9.13699
2271	Blood-Cancer	GSE61804	GSM1514040	T	None	7.55459
2272	Blood-Cancer	GSE61804	GSM1514041	T	None	8.91588
2273	Blood-Cancer	GSE61804	GSM1514042	T	None	8.54303
2274	Blood-Cancer	GSE61804	GSM1514043	T	None	8.55075
2275	Blood-Cancer	GSE61804	GSM1514044	T	None	8.74819
2276	Blood-Cancer	GSE61804	GSM1514045	T	None	9.23122
2277	Blood-Cancer	GSE61804	GSM1514046	T	None	8.27612
2278	Blood-Cancer	GSE61804	GSM1514047	T	None	8.87345
2279	Blood-Cancer	GSE61804	GSM1514048	T	None	8.26209
2280	Blood-Cancer	GSE61804	GSM1514049	T	None	9.40727
2281	Blood-Cancer	GSE61804	GSM1514050	T	None	8.07146
2282	Blood-Cancer	GSE61804	GSM1514051	T	None	8.61838
2283	Blood-Cancer	GSE61804	GSM1514052	T	None	8.78463
2284	Blood-Cancer	GSE61804	GSM1514053	T	None	8.87958
2285	Blood-Cancer	GSE61804	GSM1514054	T	None	7.87036
2286	Blood-Cancer	GSE61804	GSM1514055	T	None	8.35315
2287	Blood-Cancer	GSE61804	GSM1514056	T	None	8.0607
2288	Blood-Cancer	GSE61804	GSM1514057	T	None	7.97154
2289	Blood-Cancer	GSE61804	GSM1514058	T	None	9.2854
2290	Blood-Cancer	GSE61804	GSM1514059	T	None	8.44708
2291	Blood-Cancer	GSE61804	GSM1514060	T	None	7.6865
2292	Blood-Cancer	GSE61804	GSM1514061	T	None	8.61471
2293	Blood-Cancer	GSE61804	GSM1514062	T	None	8.93664
2294	Blood-Cancer	GSE61804	GSM1514063	T	None	7.94251
2295	Blood-Cancer	GSE61804	GSM1514064	T	None	8.93369
2296	Blood-Cancer	GSE61804	GSM1514065	T	None	8.71768
2297	Blood-Cancer	GSE61804	GSM1514066	T	None	7.41785
2298	Blood-Cancer	GSE61804	GSM1514067	T	None	8.84549
2299	Blood-Cancer	GSE61804	GSM1514068	T	None	9.18488
2300	Blood-Cancer	GSE61804	GSM1514069	T	None	7.94837
2301	Blood-Cancer	GSE61804	GSM1514070	T	None	8.9629
2302	Blood-Cancer	GSE61804	GSM1514071	T	None	8.87652
2303	Blood-Cancer	GSE61804	GSM1514072	T	None	9.48583
2304	Blood-Cancer	GSE61804	GSM1514073	T	None	7.26679
2305	Blood-Cancer	GSE61804	GSM1514074	T	None	8.27146
2306	Blood-Cancer	GSE61804	GSM1514075	T	None	9.22641
2307	Blood-Cancer	GSE61804	GSM1514077	T	None	9.03067
2308	Blood-Cancer	GSE61804	GSM1514078	T	None	7.76155
2309	Blood-Cancer	GSE61804	GSM1514079	T	None	8.65105
2310	Blood-Cancer	GSE61804	GSM1514080	T	None	7.74819
2311	Blood-Cancer	GSE61804	GSM1514081	T	None	8.95128
2312	Blood-Cancer	GSE61804	GSM1514082	T	None	8.61471
2313	Blood-Cancer	GSE61804	GSM1514083	T	None	8.75489
2314	Blood-Cancer	GSE61804	GSM1514084	T	None	8.11894
2315	Blood-Cancer	GSE61804	GSM1514085	T	None	9.10591
2316	Blood-Cancer	GSE61804	GSM1514086	T	None	8.67243
2317	Blood-Cancer	GSE61804	GSM1514087	T	None	9.66711
2318	Blood-Cancer	GSE61804	GSM1514088	T	None	8.79116
2319	Blood-Cancer	GSE61804	GSM1514089	T	None	7.33092
2320	Blood-Cancer	GSE61804	GSM1514090	T	None	8.77149
2321	Blood-Cancer	GSE61804	GSM1514091	T	None	8.83605
2322	Blood-Cancer	GSE61804	GSM1514092	T	None	8.24793
2323	Blood-Cancer	GSE61804	GSM1514093	T	None	8.29002
2324	Blood-Cancer	GSE61804	GSM1514094	T	None	8.76487
2325	Blood-Cancer	GSE61804	GSM1514095	T	None	8.16992
2326	Blood-Cancer	GSE61804	GSM1514096	T	None	8.15987
2327	Blood-Cancer	GSE61804	GSM1514097	T	None	7.54689
2328	Blood-Cancer	GSE61804	GSM1514098	T	None	9.10329
2329	Blood-Cancer	GSE61804	GSM1514099	T	None	8.55459
2330	Blood-Cancer	GSE61804	GSM1514100	T	None	8.04439
2331	Blood-Cancer	GSE61804	GSM1514101	T	None	10.4126
2332	Blood-Cancer	GSE61804	GSM1514102	T	None	7.96578
2333	Blood-Cancer	GSE61804	GSM1514103	T	None	9.20945
2334	Blood-Cancer	GSE61804	GSM1514104	T	None	8.87958
2335	Blood-Cancer	GSE61804	GSM1514105	T	None	8.46761
2336	Blood-Cancer	GSE61804	GSM1514106	T	None	9.48784
2337	Blood-Cancer	GSE61804	GSM1514107	T	None	8.50383
2338	Blood-Cancer	GSE61804	GSM1514108	T	None	7.72792
2339	Blood-Cancer	GSE61804	GSM1514109	T	None	9.2503
2340	Blood-Cancer	GSE61804	GSM1514110	T	None	8.20945
2341	Blood-Cancer	GSE61804	GSM1514111	T	None	7.24793
2342	Blood-Cancer	GSE61804	GSM1514112	T	None	7.70044
2343	Blood-Cancer	GSE61804	GSM1514113	T	None	8.29462
2344	Blood-Cancer	GSE61804	GSM1514114	T	None	8.11374
2345	Blood-Cancer	GSE61804	GSM1514115	T	None	8.63662
2346	Blood-Cancer	GSE61804	GSM1514116	T	None	7.60733
2347	Blood-Cancer	GSE61804	GSM1514117	T	None	9.13443
2348	Blood-Cancer	GSE61804	GSM1514118	T	None	9.3443
2349	Blood-Cancer	GSE61804	GSM1514119	T	None	8.10329
2350	Blood-Cancer	GSE61804	GSM1514120	T	None	8.66178
2351	Blood-Cancer	GSE61804	GSM1514121	T	None	8.25739
2352	Blood-Cancer	GSE61804	GSM1514122	T	None	8.49985
2353	Blood-Cancer	GSE61804	GSM1514123	T	None	9.08746
2354	Blood-Cancer	GSE61804	GSM1514124	T	None	8.9629
2355	Blood-Cancer	GSE61804	GSM1514125	T	None	8.11374
2356	Blood-Cancer	GSE61804	GSM1514127	T	None	8.87345
2357	Blood-Cancer	GSE61804	GSM1514128	T	None	8.3966
2358	Blood-Cancer	GSE61804	GSM1514129	T	None	8.90689
2359	Blood-Cancer	GSE61804	GSM1514130	T	None	9.20212
2360	Blood-Cancer	GSE61804	GSM1514131	T	None	8.7211
2361	Blood-Cancer	GSE61804	GSM1514132	T	None	8.35315
2362	Blood-Cancer	GSE61804	GSM1514133	T	None	8.07146
2363	Blood-Cancer	GSE61804	GSM1514134	T	None	7.49985
2364	Blood-Cancer	GSE61804	GSM1514135	T	None	8.3966
2365	Blood-Cancer	GSE61804	GSM1514136	T	None	8.69
2366	Blood-Cancer	GSE61804	GSM1514137	T	None	8.64024
2367	Blood-Cancer	GSE61804	GSM1514138	T	None	9.10591
2368	Blood-Cancer	GSE61804	GSM1514139	T	None	9.39232
2369	Blood-Cancer	GSE61804	GSM1514140	T	None	8.02791
2370	Blood-Cancer	GSE61804	GSM1514141	T	None	7.2384
2371	Blood-Cancer	GSE61804	GSM1514142	T	None	8.49985
2372	Blood-Cancer	GSE61804	GSM1514143	T	None	9.26444
2373	Blood-Cancer	GSE61804	GSM1514145	T	None	8.60363
2374	Blood-Cancer	GSE61804	GSM1514146	T	None	8.5157
2375	Blood-Cancer	GSE61804	GSM1514148	T	None	8.89785
2376	Blood-Cancer	GSE61804	GSM1514149	T	None	9.18982
2377	Blood-Cancer	GSE61804	GSM1514150	T	None	9.37504
2378	Blood-Cancer	GSE61804	GSM1514151	T	None	8.73809
2379	Blood-Cancer	GSE61804	GSM1514153	T	None	8.60363
2380	Blood-Cancer	GSE61804	GSM1514154	T	None	8.31741
2381	Blood-Cancer	GSE61804	GSM1514155	T	None	8.89482
2382	Blood-Cancer	GSE61804	GSM1514156	T	None	8.61471
2383	Blood-Cancer	GSE61804	GSM1514157	T	None	7.78136
2384	Blood-Cancer	GSE61804	GSM1514158	T	None	8.60733
2385	Blood-Cancer	GSE61804	GSM1514159	T	None	7.61471
2386	Blood-Cancer	GSE61804	GSM1514160	T	None	7.8009
2387	Blood-Cancer	GSE61804	GSM1514161	T	None	7.52356
2388	Blood-Cancer	GSE61804	GSM1514162	T	None	8.29462
2389	Blood-Cancer	GSE61804	GSM1514163	T	None	9.28771
2390	Blood-Cancer	GSE61804	GSM1514164	T	None	8.67596
2391	Blood-Cancer	GSE61804	GSM1514165	T	None	8.83605
2392	Blood-Cancer	GSE61804	GSM1514166	T	None	9.29462
2393	Blood-Cancer	GSE61804	GSM1514167	T	None	7.83289
2394	Blood-Cancer	GSE61804	GSM1514168	T	None	9.52748
2395	Blood-Cancer	GSE61804	GSM1514169	T	None	8.85798
2396	Blood-Cancer	GSE61804	GSM1514170	T	None	8.15482
2397	Blood-Cancer	GSE61804	GSM1514171	T	None	8.67948
2398	Blood-Cancer	GSE61804	GSM1514172	T	None	8.37938
2399	Blood-Cancer	GSE61804	GSM1514173	T	None	7.17991
2400	Blood-Cancer	GSE61804	GSM1514174	T	None	8.7879
2401	Blood-Cancer	GSE61804	GSM1514175	T	None	9.44294
2402	Blood-Cancer	GSE61804	GSM1514176	T	None	9.23362
2403	Blood-Cancer	GSE61804	GSM1514177	T	None	7.79442
2404	Blood-Cancer	GSE61804	GSM1514179	T	None	7.36632
2405	Blood-Cancer	GSE61804	GSM1514180	T	None	8.54303
2406	Blood-Cancer	GSE61804	GSM1514181	T	None	8.53138
2407	Blood-Cancer	GSE61804	GSM1514182	T	None	10.341
2408	Blood-Cancer	GSE61804	GSM1514183	T	None	9.09276
2409	Blood-Cancer	GSE61804	GSM1514184	T	None	8.51964
2410	Blood-Cancer	GSE61804	GSM1514185	T	None	8.97728
2411	Blood-Cancer	GSE61804	GSM1514186	T	None	10.0112
2412	Blood-Cancer	GSE61804	GSM1514187	T	None	7.94251
2413	Blood-Cancer	GSE61804	GSM1514188	T	None	8.65821
2414	Blood-Cancer	GSE61804	GSM1514189	T	None	9.37069
2415	Blood-Cancer	GSE61804	GSM1514190	T	None	9.50383
2416	Blood-Cancer	GSE61804	GSM1514191	T	None	8.57365
2417	Blood-Cancer	GSE61804	GSM1514193	T	None	8.89482
2418	Blood-Cancer	GSE61804	GSM1514194	T	None	8.72792
2419	Blood-Cancer	GSE61804	GSM1514195	T	None	8.86109
2420	Blood-Cancer	GSE61804	GSM1514196	T	None	9.01959
2421	Blood-Cancer	GSE61804	GSM1514197	T	None	8.37504
2422	Blood-Cancer	GSE61804	GSM1514198	T	None	7.10852
2423	Blood-Cancer	GSE61804	GSM1514199	T	None	9.37721
[truncated: 39,294 more rows]
