# Supplementary material for: High Expression of PLAGL2 is Associated With Poor Prognosis in High-Grade Glioma
Source: Front Genet. 2022 Feb 9;12:787746. doi: 10.3389/fgene.2021.787746 (PMC8863765; doi:10.3389/fgene.2021.787746)
Supplement: Supplementary file 5 [file Table1.XLSX]

## Sheet: PLAGL2 expression in detail
	cell line	description	PLAGL2 expression
ACH-000001	NIHOVCAR3	NIHOVCAR3_OVARY	4.72683
ACH-000002	HL60	HL60_HAEMATOPOIETIC_AND_LYMPHOID_TISSUE	3.41954
ACH-000003	CACO2	CACO2_LARGE_INTESTINE	4.77768
ACH-000004	HEL	HEL_HAEMATOPOIETIC_AND_LYMPHOID_TISSUE	5.15704
ACH-000005	HEL9217	HEL9217_HAEMATOPOIETIC_AND_LYMPHOID_TISSUE	5.51033
ACH-000006	MONOMAC6	MONOMAC6_HAEMATOPOIETIC_AND_LYMPHOID_TISSUE	4.58856
ACH-000007	LS513	LS513_LARGE_INTESTINE	2.56316
ACH-000008	A101D	A101D_SKIN	3.66789
ACH-000009	C2BBE1	C2BBE1_LARGE_INTESTINE	5.78319
ACH-000011	253J	253J_URINARY_TRACT	2.16027
ACH-000012	HCC827	HCC827_LUNG	3.90881
ACH-000013	ONCODG1	ONCODG1_OVARY	4.80323
ACH-000014	HS294T	HS294T_SKIN	3.61471
ACH-000015	NCIH1581	NCIH1581_LUNG	4.01257
ACH-000016	SLR21	SLR21_KIDNEY	3.02503
ACH-000017	SKBR3	SKBR3_BREAST	2.82171
ACH-000018	T24	T24_URINARY_TRACT	4.15623
ACH-000019	MCF7	MCF7_BREAST	2.98914
ACH-000020	MHHCALL2	MHHCALL2_HAEMATOPOIETIC_AND_LYMPHOID_TISSUE	3.98094
ACH-000021	NCIH1693	NCIH1693_LUNG	2.8679
ACH-000022	PATU8988S	PATU8988S_PANCREAS	4.06005
ACH-000023	PATU8988T	PATU8988T_PANCREAS	3.70377
ACH-000024	OPM2	OPM2_HAEMATOPOIETIC_AND_LYMPHOID_TISSUE	5.06695
ACH-000025	CH157MN	CH157MN_CENTRAL_NERVOUS_SYSTEM	3.07553
ACH-000026	253JBV	253JBV_URINARY_TRACT	2.97636
ACH-000027	GOS3	GOS3_CENTRAL_NERVOUS_SYSTEM	2.79909
ACH-000028	KPL1	KPL1_BREAST	3.38128
ACH-000029	HCC827GR5	HCC827GR5_LUNG	3.04963
ACH-000030	PC14	PC14_LUNG	3.30012
ACH-000031	PANC0213	PANC0213_PANCREAS	3.47638
ACH-000032	MHHCALL3	MHHCALL3_HAEMATOPOIETIC_AND_LYMPHOID_TISSUE	4.14078
ACH-000033	NCIH1819	NCIH1819_LUNG	4.02503
ACH-000034	PLB985	PLB985_HAEMATOPOIETIC_AND_LYMPHOID_TISSUE	3.30451
ACH-000035	NCIH1650	NCIH1650_LUNG	3.5509
ACH-000036	U343	U343_CENTRAL_NERVOUS_SYSTEM	2.66448
ACH-000037	S117	S117_THYROID	3.71589
ACH-000038	EHEB	EHEB_HAEMATOPOIETIC_AND_LYMPHOID_TISSUE	3.40327
ACH-000039	SKNMC	SKNMC_BONE	4.39985
ACH-000040	U118MG	U118MG_CENTRAL_NERVOUS_SYSTEM	3.72247
ACH-000041	RDES	RDES_BONE	4.74093
ACH-000042	PANC0203	PANC0203_PANCREAS	3.15543
ACH-000043	HS895T	HS895T_FIBROBLAST	1.72247
ACH-000044	MDAMB134VI	MDAMB134VI_BREAST	2.97269
ACH-000045	MV411	MV411_HAEMATOPOIETIC_AND_LYMPHOID_TISSUE	3.70377
ACH-000046	ACHN	ACHN_KIDNEY	2.83188
ACH-000048	TOV112D	TOV112D_OVARY	4.39025
ACH-000049	HEKTE	HEKTE_KIDNEY	3.00899
ACH-000050	NCIH929	NCIH929_HAEMATOPOIETIC_AND_LYMPHOID_TISSUE	3.11437
ACH-000051	TE617T	TE617T_SOFT_TISSUE	3.35191
ACH-000052	A673	A673_BONE	4.01078
ACH-000053	KARPAS299	KARPAS299_HAEMATOPOIETIC_AND_LYMPHOID_TISSUE	4.2555
ACH-000054	HT1080	HT1080_SOFT_TISSUE	2.94111
ACH-000055	D283MED	D283MED_CENTRAL_NERVOUS_SYSTEM	4.32912
ACH-000056	DOHH2	DOHH2_HAEMATOPOIETIC_AND_LYMPHOID_TISSUE	3.88264
ACH-000057	OPM1	OPM1_HAEMATOPOIETIC_AND_LYMPHOID_TISSUE	5.09887
ACH-000058	ML1	ML1_THYROID	2.94486
ACH-000059	SUPB15	SUPB15_HAEMATOPOIETIC_AND_LYMPHOID_TISSUE	4.27575
ACH-000060	PANC1005	PANC1005_PANCREAS	3.68594
ACH-000061	HH	HH_HAEMATOPOIETIC_AND_LYMPHOID_TISSUE	4.60466
ACH-000062	RERFLCMS	RERFLCMS_LUNG	2.86394
ACH-000063	HS616T	HS616T_FIBROBLAST	2.26903
ACH-000064	SALE	SALE_LUNG	3.69153
ACH-000065	OCIAML5	OCIAML5_HAEMATOPOIETIC_AND_LYMPHOID_TISSUE	3.77505
ACH-000066	HCC4006	HCC4006_LUNG	2.99095
ACH-000067	HS683	HS683_CENTRAL_NERVOUS_SYSTEM	3.32912
ACH-000068	REC1	REC1_HAEMATOPOIETIC_AND_LYMPHOID_TISSUE	3.66448
ACH-000069	HS611T	HS611T_HAEMATOPOIETIC_AND_LYMPHOID_TISSUE	3.91839
ACH-000070	697	697_HAEMATOPOIETIC_AND_LYMPHOID_TISSUE	3.64501
ACH-000071	HS706T	HS706T_BONE	2.49313
ACH-000072	MEG01	MEG01_HAEMATOPOIETIC_AND_LYMPHOID_TISSUE	3.6311
ACH-000073	GRANTA519	GRANTA519_HAEMATOPOIETIC_AND_LYMPHOID_TISSUE	3.52105
ACH-000074	KU812	KU812_HAEMATOPOIETIC_AND_LYMPHOID_TISSUE	3.35614
ACH-000075	U87MG	U87MG_CENTRAL_NERVOUS_SYSTEM	3.41007
ACH-000076	NCO2	NCO2_HAEMATOPOIETIC_AND_LYMPHOID_TISSUE	3.49825
ACH-000077	MJ	MJ_HAEMATOPOIETIC_AND_LYMPHOID_TISSUE	5.46434
ACH-000078	MHHNB11	MHHNB11_AUTONOMIC_GANGLIA	3.35332
ACH-000079	TE125T	TE125T_FIBROBLAST	1.96717
ACH-000080	BDCM	BDCM_HAEMATOPOIETIC_AND_LYMPHOID_TISSUE	3.20163
ACH-000081	GDM1	GDM1_HAEMATOPOIETIC_AND_LYMPHOID_TISSUE	3.57531
ACH-000082	G292CLONEA141B1	G292CLONEA141B1_BONE	4.0197
ACH-000083	HS281T	HS281T_FIBROBLAST	2.07039
ACH-000084	MUTZ3	MUTZ3_HAEMATOPOIETIC_AND_LYMPHOID_TISSUE	4.5741
ACH-000085	T3M4	T3M4_PANCREAS	3.58135
ACH-000086	ACCMESO1	ACCMESO1_PLEURA	2.37573
ACH-000087	SKES1	SKES1_BONE	4.47832
ACH-000088	HS172T	HS172T_FIBROBLAST	2.04963
ACH-000089	NCIH684	NCIH684_LARGE_INTESTINE	5.63198
ACH-000090	PC3	PC3_PROSTATE	2.45681
ACH-000091	OV56	OV56_OVARY	2.18903
ACH-000092	NCIH2452	NCIH2452_PLEURA	3.29131
ACH-000093	PANC0504	PANC0504_PANCREAS	3.34767
ACH-000094	HPAFII	HPAFII_PANCREAS	2.9855
ACH-000095	D341	D341MED_CENTRAL_NERVOUS_SYSTEM	3.3978
ACH-000096	G401	G401_SOFT_TISSUE	4.19298
ACH-000097	ZR751	ZR751_BREAST	3.24945
ACH-000098	GAMG	GAMG_CENTRAL_NERVOUS_SYSTEM	4.23573
ACH-000099	SIMA	SIMA_AUTONOMIC_GANGLIA	4.2211
ACH-000100	RH41	RH41_SOFT_TISSUE	4.02326
ACH-000101	KE37	KE37_HAEMATOPOIETIC_AND_LYMPHOID_TISSUE	4.12763
ACH-000102	GMS10	GMS10_CENTRAL_NERVOUS_SYSTEM	3.99005
ACH-000103	CAOV4	CAOV4_OVARY	4.58436
ACH-000104	LOUCY	LOUCY_HAEMATOPOIETIC_AND_LYMPHOID_TISSUE	4.59634
ACH-000105	ALLSIL	ALLSIL_HAEMATOPOIETIC_AND_LYMPHOID_TISSUE	4.53978
ACH-000106	JVM2	JVM2_HAEMATOPOIETIC_AND_LYMPHOID_TISSUE	4.39369
ACH-000107	CAPAN2	CAPAN2_PANCREAS	3.08916
ACH-000108	KP3	KP3_PANCREAS	3.03914
ACH-000109	NCIH3255	NCIH3255_LUNG	4.393
ACH-000110	NCCSTCK140	NCCSTCK140_STOMACH	5.66107
ACH-000111	HCC1187	HCC1187_BREAST	4.41007
ACH-000112	SIGM5	SIGM5_HAEMATOPOIETIC_AND_LYMPHOID_TISSUE	4.65592
ACH-000113	OCIAML2	OCIAML2_HAEMATOPOIETIC_AND_LYMPHOID_TISSUE	3.86691
ACH-000114	SU8686	SU8686_PANCREAS	3.56071
ACH-000115	VCAP	VCAP_PROSTATE	3.85798
ACH-000116	OAW28	OAW28_OVARY	6.19849
ACH-000117	EFM192A	EFM192A_BREAST	3.5097
ACH-000118	HUPT3	HUPT3_PANCREAS	3.35332
ACH-000119	HS863T	HS863T_FIBROBLAST	1.99277
ACH-000120	CHP212	CHP212_AUTONOMIC_GANGLIA	3.99277
ACH-000121	NCIH2405	NCIH2405_LUNG	3.35755
ACH-000122	SUPT11	SUPT11_HAEMATOPOIETIC_AND_LYMPHOID_TISSUE	3.99458
ACH-000123	COV434	COV434_OVARY	3.09085
ACH-000124	OCILY19	OCILY19_HAEMATOPOIETIC_AND_LYMPHOID_TISSUE	3.83693
ACH-000125	TO175T	TO175T_FIBROBLAST	2.4957
ACH-000126	KG1C	KG1C_CENTRAL_NERVOUS_SYSTEM	3.16189
ACH-000127	SLR20	SLR20_KIDNEY	3.43162
ACH-000128	LN319	LN319_CENTRAL_NERVOUS_SYSTEM	3.11103
ACH-000129	NCIH1341	NCIH1341_LUNG	3.28836
ACH-000130	NALM19	NALM19_HAEMATOPOIETIC_AND_LYMPHOID_TISSUE	4.36527
ACH-000131	HS229T	HS229T_FIBROBLAST	2.49825
ACH-000132	JHOS2	JHOS2_OVARY	2.34767
ACH-000133	HS729	HS729_SOFT_TISSUE	4.0268
ACH-000134	HS274T	HS274T_FIBROBLAST	2.4957
ACH-000135	HS940T	HS940T_FIBROBLAST	2.40327
ACH-000136	CHP126	CHP126_AUTONOMIC_GANGLIA	3.83794
ACH-000137	8MGBA	8MGBA_CENTRAL_NERVOUS_SYSTEM	3.17153
ACH-000138	CFPAC1	CFPAC1_PANCREAS	2.9542
ACH-000139	PANC0327	PANC0327_PANCREAS	2.67129
ACH-000140	PFEIFFER	PFEIFFER_HAEMATOPOIETIC_AND_LYMPHOID_TISSUE	4.17473
ACH-000141	SNU308	SNU308_BILIARY_TRACT	2.91839
ACH-000142	CAL29	CAL29_URINARY_TRACT	4.45812
ACH-000143	HCC2429	HCC2429_LUNG	3.70044
ACH-000144	RERFGC1B	RERFGC1B_STOMACH	5.62352
ACH-000145	SKLMS1	SKLMS1_SOFT_TISSUE	3.03914
ACH-000146	THP1	THP1_HAEMATOPOIETIC_AND_LYMPHOID_TISSUE	4.35262
ACH-000147	T47D	T47D_BREAST	3.47508
ACH-000148	HS578T	HS578T_BREAST	1.95977
ACH-000149	SKNSH	SKNSH_AUTONOMIC_GANGLIA	3.33914
ACH-000150	HCC2935	HCC2935_LUNG	4.06609
ACH-000151	JM1	JM1_HAEMATOPOIETIC_AND_LYMPHOID_TISSUE	4.86691
ACH-000152	M059K	M059K_CENTRAL_NERVOUS_SYSTEM	3.38543
ACH-000153	NCIH2052	NCIH2052_PLEURA	3.68032
ACH-000154	HS888T	HS888T_FIBROBLAST	2.33056
ACH-000155	SW1990	SW1990_PANCREAS	3.00899
ACH-000156	MHHCALL4	MHHCALL4_HAEMATOPOIETIC_AND_LYMPHOID_TISSUE	4.41007
ACH-000157	A4FUK	A4FUK_HAEMATOPOIETIC_AND_LYMPHOID_TISSUE	4.69822
ACH-000158	OCILY3	OCILY3_HAEMATOPOIETIC_AND_LYMPHOID_TISSUE	4.27426
ACH-000159	OSRC2	OSRC2_KIDNEY	3.849
ACH-000160	BT12	BT12_SOFT_TISSUE	2.73118
ACH-000161	CORL105	CORL105_LUNG	2.73769
ACH-000162	GA10	GA10_HAEMATOPOIETIC_AND_LYMPHOID_TISSUE	3.98185
ACH-000163	SW579	SW579_THYROID	3.42492
ACH-000164	PANC1	PANC1_PANCREAS	4.13914
ACH-000165	HS751T	HS751T_FIBROBLAST	2.62293
ACH-000166	KASUMI6	KASUMI6_HAEMATOPOIETIC_AND_LYMPHOID_TISSUE	3.50843
ACH-000167	KE97	KE97_STOMACH	3.39506
ACH-000168	NOMO1	NOMO1_HAEMATOPOIETIC_AND_LYMPHOID_TISSUE	3.67694
ACH-000169	RD	RD_SOFT_TISSUE	4.30889
ACH-000170	PRECLH	PRECLH_PROSTATE	4.06437
ACH-000171	VMRCRCZ	VMRCRCZ_KIDNEY	2.88947
ACH-000172	TM87	TM87_SOFT_TISSUE	3.15218
ACH-000173	JHUEM3	JHUEM3_ENDOMETRIUM	3.02503
ACH-000174	CAL62	CAL62_THYROID	3.87578
ACH-000175	TE159T	TE159T_FIBROBLAST	2.02148
ACH-000176	LOUNH91	LOUNH91_LUNG	3.90593
ACH-000177	NCIH660	NCIH660_PROSTATE	3.73118
ACH-000178	HS766T	HS766T_PANCREAS	3.82477
ACH-000179	NCIH1618	NCIH1618_LUNG	4.30961
ACH-000180	HS839T	HS839T_FIBROBLAST	2.07382
ACH-000181	SCC9	SCC9_UPPER_AERODIGESTIVE_TRACT	2.98003
ACH-000182	SNU869	SNU869_BILIARY_TRACT	3.47249
ACH-000183	L363	L363_HAEMATOPOIETIC_AND_LYMPHOID_TISSUE	4.74147
ACH-000184	HS343T	HS343T_FIBROBLAST	2.19535
ACH-000185	HS737T	HS737T_FIBROBLAST	2.17313
ACH-000186	NCIH2444	NCIH2444_LUNG	3.10769
ACH-000187	CORL311	CORL311_LUNG	5.07082
ACH-000188	SCC25	SCC25_UPPER_AERODIGESTIVE_TRACT	2.31615
ACH-000189	RCC10RGB	RCC10RGB_KIDNEY	2.88362
ACH-000190	HDMYZ	HDMYZ_HAEMATOPOIETIC_AND_LYMPHOID_TISSUE	3.04439
ACH-000191	BHT101	BHT101_THYROID	2.89724
ACH-000192	MFE280	MFE280_ENDOMETRIUM	4.45615
ACH-000193	KARPAS620	KARPAS620_HAEMATOPOIETIC_AND_LYMPHOID_TISSUE	3.75809
ACH-000194	HS934T	HS934T_FIBROBLAST	2.21101
ACH-000195	SET2	SET2_HAEMATOPOIETIC_AND_LYMPHOID_TISSUE	3.96993
ACH-000196	HCC1599	HCC1599_BREAST	3.23113
ACH-000197	TALL1	TALL1_HAEMATOPOIETIC_AND_LYMPHOID_TISSUE	4.65363
ACH-000198	EOL1	EOL1_HAEMATOPOIETIC_AND_LYMPHOID_TISSUE	4.59813
ACH-000199	HS255T	HS255T_FIBROBLAST	2.17313
ACH-000200	NMCG1	NMCG1_CENTRAL_NERVOUS_SYSTEM	3.67016
ACH-000201	A204	A204_SOFT_TISSUE	3.21101
ACH-000202	COLO320	COLO320_LARGE_INTESTINE	4.21023
ACH-000203	NH6	NH6_AUTONOMIC_GANGLIA	3.84499
ACH-000204	LP1	LP1_HAEMATOPOIETIC_AND_LYMPHOID_TISSUE	4.72901
ACH-000205	PK59	PK59_PANCREAS	3.08576
ACH-000206	C8166	C8166_HAEMATOPOIETIC_AND_LYMPHOID_TISSUE	5.30889
ACH-000207	DETROIT562	DETROIT562_UPPER_AERODIGESTIVE_TRACT	2.852
ACH-000208	U178	U178_CENTRAL_NERVOUS_SYSTEM	2.5509
ACH-000209	SNU1079	SNU1079_BILIARY_TRACT	2.88753
ACH-000210	CADOES1	CADOES1_BONE	4.07895
ACH-000211	DAOY	DAOY_CENTRAL_NERVOUS_SYSTEM	3.52857
ACH-000212	CAL120	CAL120_BREAST	3.6427
ACH-000213	HUPT4	HUPT4_PANCREAS	2.62994
ACH-000214	HS675T	HS675T_FIBROBLAST	2.44626
ACH-000215	LN382	LN382_CENTRAL_NERVOUS_SYSTEM	3.26604
ACH-000216	JHESOAD1	JHESOAD1_OESOPHAGUS	3.25399
ACH-000217	JHH6	JHH6_LIVER	3.0054
ACH-000218	PL21	PL21_HAEMATOPOIETIC_AND_LYMPHOID_TISSUE	4.78555
ACH-000219	A375	A375_SKIN	3.14568
ACH-000220	MINO	MINO_HAEMATOPOIETIC_AND_LYMPHOID_TISSUE	4.02237
ACH-000221	SNU398	SNU398_LIVER	4.93452
ACH-000222	ASPC1	ASPC1_PANCREAS	3.2555
ACH-000223	HCC1937	HCC1937_BREAST	3.31179
ACH-000224	HS819T	HS819T_FIBROBLAST	1.65535
ACH-000225	ECC12	ECC12_STOMACH	3.95699
ACH-000226	SUPM2	SUPM2_HAEMATOPOIETIC_AND_LYMPHOID_TISSUE	3.43696
ACH-000227	KPNYN	KPNYN_AUTONOMIC_GANGLIA	3.64847
ACH-000228	BICR31	BICR31_UPPER_AERODIGESTIVE_TRACT	3.53232
ACH-000229	HS822T	HS822T_FIBROBLAST	1.94111
ACH-000230	HS742T	HS742T_FIBROBLAST	1.36177
ACH-000231	KALS1	KALS1_CENTRAL_NERVOUS_SYSTEM	2.91839
ACH-000232	U251MG	U251MG_CENTRAL_NERVOUS_SYSTEM	2.7845
ACH-000233	DEL	DEL_HAEMATOPOIETIC_AND_LYMPHOID_TISSUE	3.73877
ACH-000234	CAKI2	CAKI2_KIDNEY	3.07553
ACH-000235	PANC0403	PANC0403_PANCREAS	2.65764
ACH-000236	SW1417	SW1417_LARGE_INTESTINE	4.58135
ACH-000237	JHOM1	JHOM1_OVARY	2.97636
ACH-000238	SCC4	SCC4_UPPER_AERODIGESTIVE_TRACT	3.20006
ACH-000239	HUG1N	HUG1N_STOMACH	3.82375
ACH-000240	HS600T	HS600T_FIBROBLAST	1.82375
ACH-000241	JK1	JK1_HAEMATOPOIETIC_AND_LYMPHOID_TISSUE	3.30305
ACH-000242	RT4	RT4_URINARY_TRACT	3.61941
ACH-000243	DANG	DANG_PANCREAS	3.54597
ACH-000244	DKMG	DKMG_CENTRAL_NERVOUS_SYSTEM	2.77189
ACH-000245	BL41	BL41_HAEMATOPOIETIC_AND_LYMPHOID_TISSUE	4.20633
ACH-000246	SLR23	SLR23_KIDNEY	2.72028
ACH-000247	OCUM1	OCUM1_STOMACH	2.96901
ACH-000248	AU565	AU565_BREAST	2.852
ACH-000249	CL11	CL11_LARGE_INTESTINE	3.52857
ACH-000250	KMRC20	KMRC20_KIDNEY	3.01257
ACH-000251	NCIH2887	NCIH2887_LUNG	3.24336
ACH-000252	LS1034	LS1034_LARGE_INTESTINE	4.62819
ACH-000253	COLO201	COLO201_LARGE_INTESTINE	4.38336
ACH-000254	SCC15	SCC15_UPPER_AERODIGESTIVE_TRACT	2.90304
ACH-000255	LMSU	LMSU_STOMACH	3.47897
ACH-000256	COV318	COV318_OVARY	3.94767
ACH-000257	CORL279	CORL279_LUNG	3.74739
ACH-000258	DU4475	DU4475_BREAST	3.18269
ACH-000259	KELLY	KELLY_AUTONOMIC_GANGLIA	4.09508
ACH-000260	SKNAS	SKNAS_AUTONOMIC_GANGLIA	3.39094
ACH-000261	RERFLCAI	RERFLCAI_LUNG	2.55336
ACH-000262	UOK101	UOK101_KIDNEY	3.0993
ACH-000263	KASUMI1	KASUMI1_HAEMATOPOIETIC_AND_LYMPHOID_TISSUE	3.94017
ACH-000264	CALU6	CALU6_LUNG	3.9982
ACH-000265	KP4	KP4_PANCREAS	3.49953
ACH-000266	SNU213	SNU213_PANCREAS	3.22497
ACH-000267	HDLM2	HDLM2_HAEMATOPOIETIC_AND_LYMPHOID_TISSUE	3.3505
ACH-000268	SNU245	SNU245_BILIARY_TRACT	2.97269
ACH-000269	AM38	AM38_CENTRAL_NERVOUS_SYSTEM	3.0036
ACH-000270	HPAC	HPAC_PANCREAS	2.42492
ACH-000271	SUDHL10	SUDHL10_HAEMATOPOIETIC_AND_LYMPHOID_TISSUE	4.50208
ACH-000272	SLR24	SLR24_KIDNEY	2.7866
ACH-000273	SF539	SF539_CENTRAL_NERVOUS_SYSTEM	2.63691
ACH-000274	HS852T	HS852T_SKIN	3.26303
ACH-000275	HS834T	HS834T_FIBROBLAST	2.20163
ACH-000276	HCC38	HCC38_BREAST	4.51665
ACH-000277	HCC1419	HCC1419_BREAST	3.18428
ACH-000278	COV362	COV362_OVARY	3.06178
ACH-000279	EWS502	EWS502_BONE	4.32553
ACH-000280	SNU840	SNU840_OVARY	3.16189
ACH-000281	KP2	KP2_PANCREAS	2.72247
ACH-000282	NCIH1755	NCIH1755_LUNG	3.28392
ACH-000283	A1207	A1207_CENTRAL_NERVOUS_SYSTEM	3.77926
ACH-000284	HS840T	HS840T_FIBROBLAST	2.54597
ACH-000285	TOLEDO	TOLEDO_HAEMATOPOIETIC_AND_LYMPHOID_TISSUE	4.95373
ACH-000286	SNU1033	SNU1033_LARGE_INTESTINE	4.08151
ACH-000287	NUDUL1	NUDUL1_HAEMATOPOIETIC_AND_LYMPHOID_TISSUE	4.22419
ACH-000288	BT549	BT549_BREAST	2.79077
ACH-000289	SNU466	SNU466_CENTRAL_NERVOUS_SYSTEM	2.41143
ACH-000290	NCIH209	NCIH209_LUNG	4.17313
ACH-000291	OV90	OV90_OVARY	3.67469
ACH-000292	NCIH841	NCIH841_LUNG	3.4489
ACH-000293	KLE	KLE_ENDOMETRIUM	3.43162
ACH-000294	NB4	NB4_HAEMATOPOIETIC_AND_LYMPHOID_TISSUE	4.48349
ACH-000295	EM2	EM2_HAEMATOPOIETIC_AND_LYMPHOID_TISSUE	4.52607
ACH-000296	OUMS23	OUMS23_LARGE_INTESTINE	3.39369
ACH-000297	NCIH889	NCIH889_LUNG	2.98185
ACH-000298	NCIH2029	NCIH2029_LUNG	3.66107
ACH-000299	HNT34	HNT34_HAEMATOPOIETIC_AND_LYMPHOID_TISSUE	3.18903
ACH-000300	SLR25	SLR25_KIDNEY	3.0321
ACH-000301	LAMA84	LAMA84_HAEMATOPOIETIC_AND_LYMPHOID_TISSUE	3.58616
ACH-000302	SNU1077	SNU1077_ENDOMETRIUM	3.17153
ACH-000303	SNU5	SNU5_STOMACH	3.11103
ACH-000304	WM115	WM115_SKIN	3.09255
ACH-000305	ECGI10	ECGI10_OESOPHAGUS	3.7845
ACH-000306	HS688AT	HS688AT_FIBROBLAST	1.87971
ACH-000307	PK1	PK1_PANCREAS	3.89724
ACH-000308	EFO21	EFO21_OVARY	4.10518
ACH-000310	IMR32	IMR32_AUTONOMIC_GANGLIA	3.7366
ACH-000311	NCIH2122	NCIH2122_LUNG	3.08066
ACH-000312	SKNBE2	SKNBE2_AUTONOMIC_GANGLIA	3.53107
ACH-000313	KMRC3	KMRC3_KIDNEY	2.79494
ACH-000314	HCC2108	HCC2108_LUNG	3.70487
ACH-000315	KARPAS422	KARPAS422_HAEMATOPOIETIC_AND_LYMPHOID_TISSUE	4.4614
ACH-000316	SNU886	SNU886_LIVER	3.43429
ACH-000317	TUHR14TKB	TUHR14TKB_KIDNEY	2.26903
ACH-000318	TE10	TE10_OESOPHAGUS	2.47508
ACH-000319	MPP89	MPP89_PLEURA	3.20945
ACH-000320	PSN1	PSN1_PANCREAS	3.28983
ACH-000321	MOLM6	MOLM6_HAEMATOPOIETIC_AND_LYMPHOID_TISSUE	3.37573
ACH-000322	HT144	HT144_SKIN	2.98732
ACH-000323	42MGBA	42MGBA_CENTRAL_NERVOUS_SYSTEM	3.27202
ACH-000324	JHOC5	JHOC5_OVARY	4.02857
ACH-000325	SNU620	SNU620_STOMACH	3.95513
ACH-000326	JURLMK1	JURLMK1_HAEMATOPOIETIC_AND_LYMPHOID_TISSUE	4.99684
ACH-000327	NCIH1395	NCIH1395_LUNG	1.90304
ACH-000328	LN215	LN215_CENTRAL_NERVOUS_SYSTEM	3.47508
ACH-000329	CCFSTTG1	CCFSTTG1_CENTRAL_NERVOUS_SYSTEM	2.96717
ACH-000330	EFM19	EFM19_BREAST	3.82477
ACH-000331	ISTMES2	ISTMES2_PLEURA	3.12267
ACH-000332	YAPC	YAPC_PANCREAS	4.03474
ACH-000333	JHOM2B	JHOM2B_OVARY	5.0691
ACH-000334	DB	DB_HAEMATOPOIETIC_AND_LYMPHOID_TISSUE	4.5435
ACH-000335	MSTO211H	MSTO211H_PLEURA	3.56071
ACH-000336	OCIAML3	OCIAML3_HAEMATOPOIETIC_AND_LYMPHOID_TISSUE	3.66903
ACH-000337	NCIH3122	NCIH3122_LUNG	3.57168
ACH-000338	SR786	SR786_HAEMATOPOIETIC_AND_LYMPHOID_TISSUE	4.65191
ACH-000339	HCC461	HCC461_LUNG	3.64501
ACH-000340	HS870T	HS870T_FIBROBLAST	2
ACH-000341	SKNFI	SKNFI_AUTONOMIC_GANGLIA	4.1035
ACH-000342	CL14	CL14_LARGE_INTESTINE	5.62848
ACH-000343	NCIH522	NCIH522_LUNG	3.93546
ACH-000344	SNU668	SNU668_STOMACH	3.20006
ACH-000345	KPNRTBM1	KPNRTBM1_AUTONOMIC_GANGLIA	3.44361
ACH-000346	JVM3	JVM3_HAEMATOPOIETIC_AND_LYMPHOID_TISSUE	4.71864
ACH-000347	QGP1	QGP1_PANCREAS	3.78346
ACH-000348	RPMI7951	RPMI7951_SKIN	3.31179
ACH-000349	HCC1500	HCC1500_BREAST	2.96532
ACH-000350	COLO678	COLO678_LARGE_INTESTINE	4.53605
ACH-000351	MKN1	MKN1_STOMACH	3.78869
ACH-000352	HCC1428	HCC1428_BREAST	2.61589
ACH-000353	TE15	TE15_OESOPHAGUS	3.51223
ACH-000354	CAPAN1	CAPAN1_PANCREAS	3.51475
ACH-000355	NCIH82	NCIH82_LUNG	4.57833
ACH-000356	MKN45	MKN45_STOMACH	4.62234
ACH-000357	JEKO1	JEKO1_HAEMATOPOIETIC_AND_LYMPHOID_TISSUE	3.853
ACH-000358	NCIH69	NCIH69_LUNG	3.78241
ACH-000359	MG63	MG63_BONE	2.35614
ACH-000360	NCIH508	NCIH508_LARGE_INTESTINE	5.28244
ACH-000361	SKHEP1	SKHEP1_LIVER	3.24945
ACH-000362	MOLM13	MOLM13_HAEMATOPOIETIC_AND_LYMPHOID_TISSUE	3.69488
ACH-000363	SKMM2	SKMM2_HAEMATOPOIETIC_AND_LYMPHOID_TISSUE	4.32337
ACH-000364	U2OS	U2OS_BONE	4.1914
ACH-000365	SUDHL4	SUDHL4_HAEMATOPOIETIC_AND_LYMPHOID_TISSUE	3.50208
ACH-000366	SKNDZ	SKNDZ_AUTONOMIC_GANGLIA	4.50589
ACH-000367	NCIH226	NCIH226_LUNG	3.17153
ACH-000368	SNU1105	SNU1105_CENTRAL_NERVOUS_SYSTEM	2.74201
ACH-000369	MOLM16	MOLM16_HAEMATOPOIETIC_AND_LYMPHOID_TISSUE	3.78973
ACH-000370	SNU626	SNU626_CENTRAL_NERVOUS_SYSTEM	2.93546
ACH-000371	RL	RL_HAEMATOPOIETIC_AND_LYMPHOID_TISSUE	4.46271
ACH-000372	P12ICHIKAWA	P12ICHIKAWA_HAEMATOPOIETIC_AND_LYMPHOID_TISSUE	4.89093
ACH-000373	SKM1	SKM1_HAEMATOPOIETIC_AND_LYMPHOID_TISSUE	4.47444
ACH-000374	HCC1143	HCC1143_BREAST	4.91934
ACH-000375	G402	G402_SOFT_TISSUE	3.27947
ACH-000376	SF295	SF295_CENTRAL_NERVOUS_SYSTEM	2.57046
ACH-000377	SNU478	SNU478_BILIARY_TRACT	3.45286
ACH-000378	NCIH647	NCIH647_LUNG	3.73552
ACH-000379	NCIH1781	NCIH1781_LUNG	4.83289
ACH-000380	KMS12BM	KMS12BM_HAEMATOPOIETIC_AND_LYMPHOID_TISSUE	3.39917
ACH-000381	T84	T84_LARGE_INTESTINE	4.26604
ACH-000382	CORL24	CORL24_LUNG	4.26153
ACH-000383	OE33	OE33_OESOPHAGUS	3.37295
ACH-000384	SW780	SW780_URINARY_TRACT	4.07039
ACH-000385	SKRC20	SKRC20_KIDNEY	3.09592
ACH-000386	KG1	KG1_HAEMATOPOIETIC_AND_LYMPHOID_TISSUE	3.92979
ACH-000387	TF1	TF1_HAEMATOPOIETIC_AND_LYMPHOID_TISSUE	3.89142
ACH-000388	NUDHL1	NUDHL1_HAEMATOPOIETIC_AND_LYMPHOID_TISSUE	4.53543
ACH-000389	H4	H4_CENTRAL_NERVOUS_SYSTEM	2.97636
ACH-000390	LUDLU1	LUDLU1_LUNG	3.59096
ACH-000391	MHHES1	MHHES1_BONE	3.47897
ACH-000392	CALU3	CALU3_LUNG	2.83794
ACH-000393	HLF	HLF_LIVER	4.57046
ACH-000394	NCIH2081	NCIH2081_LUNG	3.98732
ACH-000395	NCIH520	NCIH520_LUNG	5.07553
ACH-000396	J82	J82_URINARY_TRACT	3.8748
ACH-000397	TEN	TEN_ENDOMETRIUM	4.01078
ACH-000398	RI1	RI1_HAEMATOPOIETIC_AND_LYMPHOID_TISSUE	3.93734
ACH-000399	NCIH2196	NCIH2196_LUNG	3.38681
ACH-000400	SKCO1	SKCO1_LARGE_INTESTINE	3.81558
ACH-000401	COLO800	COLO800_SKIN	3.33199
ACH-000402	BL70	BL70_HAEMATOPOIETIC_AND_LYMPHOID_TISSUE	3.96625
ACH-000403	NCIH747	NCIH747_LARGE_INTESTINE	4.03034
ACH-000404	K029AX	K029AX_SKIN	2.65535
ACH-000405	MEC1	MEC1_HAEMATOPOIETIC_AND_LYMPHOID_TISSUE	4.52544
ACH-000406	U937	U937_HAEMATOPOIETIC_AND_LYMPHOID_TISSUE	4.29572
ACH-000407	SNU685	SNU685_ENDOMETRIUM	4.34696
ACH-000408	TE5	TE5_OESOPHAGUS	3.17951
ACH-000409	OVSAHO	OVSAHO_OVARY	3.24336
ACH-000410	SAOS2	SAOS2_BONE	3.47249
ACH-000411	769P	769P_KIDNEY	2.99277
ACH-000412	SNU1197	SNU1197_LARGE_INTESTINE	3.11437
ACH-000413	HS739T	HS739T_FIBROBLAST	2.24184
ACH-000414	NCIH1944	NCIH1944_LUNG	2.28688
ACH-000415	BICR6	BICR6_UPPER_AERODIGESTIVE_TRACT	2.09761
ACH-000416	NCIH838	NCIH838_LUNG	3.04089
ACH-000417	PANC0813	PANC0813_PANCREAS	3.48414
ACH-000418	SW1353	SW1353_BONE	2.28983
ACH-000419	KMS28BM	KMS28BM_HAEMATOPOIETIC_AND_LYMPHOID_TISSUE	5.04352
ACH-000420	SNU449	SNU449_LIVER	3.70044
ACH-000421	SW837	SW837_LARGE_INTESTINE	4.0798
ACH-000422	SNU475	SNU475_LIVER	3.65191
ACH-000423	SKMEL3	SKMEL3_SKIN	3.69711
ACH-000424	TC71	TC71_BONE	3.97269
ACH-000425	UACC62	UACC62_SKIN	2.50589
ACH-000427	NCIN87	NCIN87_STOMACH	3.53605
ACH-000428	UO31	UO31_KIDNEY	2.93168
ACH-000429	A704	A704_KIDNEY	1.83592
ACH-000430	TYKNU	TYKNU_OVARY	3.84499
ACH-000431	NCIH1694	NCIH1694_LUNG	3.64155
ACH-000432	BV173	BV173_HAEMATOPOIETIC_AND_LYMPHOID_TISSUE	2.70708
ACH-000433	CAKI1	CAKI1_KIDNEY	2.19849
ACH-000434	NCIH1915	NCIH1915_LUNG	2.53854
ACH-000435	EFE184	EFE184_ENDOMETRIUM	3.00899
ACH-000436	OCIMY7	OCIMY7_HAEMATOPOIETIC_AND_LYMPHOID_TISSUE	3.51979
ACH-000437	SW1088	SW1088_CENTRAL_NERVOUS_SYSTEM	3.54102
ACH-000438	LU65	LU65_LUNG	2.68257
ACH-000439	ME1	ME1_HAEMATOPOIETIC_AND_LYMPHOID_TISSUE	3.90207
ACH-000440	CA46	CA46_HAEMATOPOIETIC_AND_LYMPHOID_TISSUE	4.37643
ACH-000441	SH4	SH4_SKIN	3.63459
ACH-000442	RERFLCSQ1	RERFLCSQ1_LUNG	3.58856
ACH-000443	OVKATE	OVKATE_OVARY	3.18587
ACH-000444	LU99	LU99_LUNG	3.64501
ACH-000445	KNS60	KNS60_CENTRAL_NERVOUS_SYSTEM	2.96162
ACH-000446	KPNSI9S	KPNSI9S_AUTONOMIC_GANGLIA	3.71699
ACH-000447	NCIH2228	NCIH2228_LUNG	3.31615
ACH-000448	NCIH1666	NCIH1666_LUNG	3.5472
ACH-000449	MESSA	MESSA_SOFT_TISSUE	3.32048
ACH-000450	MELHO	MELHO_SKIN	3.27798
ACH-000451	NCIH2085	NCIH2085_LUNG	3.93452
ACH-000452	TE8	TE8_OESOPHAGUS	3.63459
ACH-000453	MOLP2	MOLP2_HAEMATOPOIETIC_AND_LYMPHOID_TISSUE	4.1635
ACH-000454	HCC95	HCC95_LUNG	3.81865
ACH-000455	LN428	LN428_CENTRAL_NERVOUS_SYSTEM	2.74201
ACH-000456	BCPAP	BCPAP_THYROID	3.68032
ACH-000457	CAL54	CAL54_KIDNEY	3.2032
ACH-000458	CJM	CJM_SKIN	4.39369
ACH-000459	TUHR10TKB	TUHR10TKB_KIDNEY	3.59335
ACH-000460	SNU8	SNU8_OVARY	3.48671
ACH-000461	SNU1196	SNU1196_BILIARY_TRACT	4.05918
ACH-000462	NALM1	NALM1_HAEMATOPOIETIC_AND_LYMPHOID_TISSUE	4.01614
ACH-000463	NCIH460	NCIH460_LUNG	2.64155
ACH-000464	CAS1	CAS1_CENTRAL_NERVOUS_SYSTEM	3.19849
ACH-000465	SKMEL1	SKMEL1_SKIN	3.55827
ACH-000466	SNU216	SNU216_STOMACH	3.60999
ACH-000467	HCC56	HCC56_LARGE_INTESTINE	3.56803
ACH-000468	PK45H	PK45H_PANCREAS	3.31759
ACH-000469	YH13	YH13_CENTRAL_NERVOUS_SYSTEM	2.62059
ACH-000470	SW1463	SW1463_LARGE_INTESTINE	3.82375
ACH-000471	LI7	LI7_LIVER	4.37365
ACH-000472	HSC2	HSC2_UPPER_AERODIGESTIVE_TRACT	2.61824
ACH-000473	RT112	RT112_URINARY_TRACT	4.0635
ACH-000475	HUH1	HUH1_LIVER	3.42895
ACH-000476	JHH4	JHH4_LIVER	3.95233
ACH-000477	MALME3M	MALME3M_SKIN	3.04614
ACH-000478	SNU387	SNU387_LIVER	3.56194
ACH-000479	KNS81	KNS81_CENTRAL_NERVOUS_SYSTEM	3.15866
ACH-000480	HUH7	HUH7_LIVER	4.34199
ACH-000481	NCIH2170	NCIH2170_LUNG	3.48929
ACH-000482	RERFLCKJ	RERFLCKJ_LUNG	3.22959
ACH-000483	SNU182	SNU182_LIVER	3.86493
ACH-000484	VMRCRCW	VMRCRCW_KIDNEY	3.05485
ACH-000485	GSU	GSU_STOMACH	3.02148
ACH-000486	KU1919	KU1919_URINARY_TRACT	3.54844
ACH-000487	F36P	F36P_HAEMATOPOIETIC_AND_LYMPHOID_TISSUE	3.68257
ACH-000488	TE11	TE11_OESOPHAGUS	3.32048
ACH-000489	SW1116	SW1116_LARGE_INTESTINE	3.76129
ACH-000490	SF767	SF767_CENTRAL_NERVOUS_SYSTEM	2.74846
ACH-000491	NCIH716	NCIH716_LARGE_INTESTINE	3.23419
ACH-000492	MUTZ5	MUTZ5_HAEMATOPOIETIC_AND_LYMPHOID_TISSUE	4.03034
ACH-000493	SNU423	SNU423_LIVER	3.81044
ACH-000494	OELE	OELE_OVARY	2.71809
ACH-000495	TUHR4TKB	TUHR4TKB_KIDNEY	3.48543
ACH-000496	NCIH1792	NCIH1792_LUNG	3.70377
ACH-000498	KO52	KO52_HAEMATOPOIETIC_AND_LYMPHOID_TISSUE	4.01792
ACH-000499	EW8	EW8_BONE	4.18428
ACH-000500	SNU46	SNU46_UPPER_AERODIGESTIVE_TRACT	3.78136
ACH-000501	LS123	LS123_LARGE_INTESTINE	3.28096
ACH-000502	TCCPAN2	TCCPAN2_PANCREAS	2.81558
ACH-000503	BICR16	BICR16_UPPER_AERODIGESTIVE_TRACT	2.25701
ACH-000504	SNB75	SNB75_CENTRAL_NERVOUS_SYSTEM	2.76553
ACH-000505	RKN	RKN_SOFT_TISSUE	3.57289
ACH-000506	NCIH146	NCIH146_LUNG	4.7703
ACH-000507	KE39	KE39_STOMACH	4.81404
ACH-000508	CORL88	CORL88_LUNG	3.7866
ACH-000509	HUT78	HUT78_HAEMATOPOIETIC_AND_LYMPHOID_TISSUE	4.54473
ACH-000510	NCIH1299	NCIH1299_LUNG	3.72465
ACH-000511	CALU1	CALU1_LUNG	3.83491
ACH-000512	INA6	INA6_HAEMATOPOIETIC_AND_LYMPHOID_TISSUE	5.24641
ACH-000513	SNU1272	SNU1272_KIDNEY	2.52356
ACH-000514	NCIH1092	NCIH1092_LUNG	3.64039
ACH-000515	HCC33	HCC33_LUNG	3.95791
ACH-000516	CAL78	CAL78_BONE	3.04264
ACH-000517	SNU410	SNU410_PANCREAS	3.50335
ACH-000518	CAL33	CAL33_UPPER_AERODIGESTIVE_TRACT	3.52857
ACH-000519	PEER	PEER_HAEMATOPOIETIC_AND_LYMPHOID_TISSUE	4.38198
ACH-000520	59M	59M_OVARY	2.82985
ACH-000521	NCIH2030	NCIH2030_LUNG	3.26754
ACH-000522	UMUC3	UMUC3_URINARY_TRACT	3.19535
ACH-000523	NCIH1184	NCIH1184_LUNG	3.69711
ACH-000524	KURAMOCHI	KURAMOCHI_OVARY	3.91073
ACH-000525	NCIH2171	NCIH2171_LUNG	4.17951
ACH-000526	HS821T	HS821T_FIBROBLAST	2.08406
ACH-000527	OVISE	OVISE_OVARY	3.00899
ACH-000528	ABC1	ABC1_LUNG	4.03034
ACH-000529	T173	T173_FIBROBLAST	2.23879
ACH-000530	DMS114	DMS114_LUNG	3.68706
ACH-000531	RS5	RS5_FIBROBLAST	1.99277
ACH-000532	SNU61	SNU61_LARGE_INTESTINE	3.31615
ACH-000533	NCIH2004RT	NCIH2004RT_SOFT_TISSUE	2.4957
ACH-000534	WSUDLCL2	WSUDLCL2_HAEMATOPOIETIC_AND_LYMPHOID_TISSUE	4.56803
ACH-000535	BXPC3	BXPC3_PANCREAS	3.86493
ACH-000536	BT20	BT20_BREAST	3.48285
ACH-000537	SNU761	SNU761_LIVER	2.89142
ACH-000538	HUTU80	HUTU80_SMALL_INTESTINE	3.49313
ACH-000539	HS618T	HS618T_FIBROBLAST	2.42492
ACH-000540	HS606T	HS606T_FIBROBLAST	2.40871
ACH-000541	KMS34	KMS34_HAEMATOPOIETIC_AND_LYMPHOID_TISSUE	4.96578
ACH-000542	HEYA8	HEYA8_OVARY	2.37573
ACH-000543	SNU489	SNU489_CENTRAL_NERVOUS_SYSTEM	3.0268
ACH-000544	OE21	OE21_OESOPHAGUS	2.14405
ACH-000545	VMCUB1	VMCUB1_URINARY_TRACT	3.1635
ACH-000546	HSC4	HSC4_UPPER_AERODIGESTIVE_TRACT	4.14323
ACH-000547	HT1197	HT1197_URINARY_TRACT	2.28096
ACH-000548	BHY	BHY_UPPER_AERODIGESTIVE_TRACT	4.20789
ACH-000549	SNU1076	SNU1076_UPPER_AERODIGESTIVE_TRACT	3.44493
ACH-000550	IGR39	IGR39_SKIN	3.83188
ACH-000551	K562	K562_HAEMATOPOIETIC_AND_LYMPHOID_TISSUE	3.47119
ACH-000552	HT29	HT29_LARGE_INTESTINE	3.64847
ACH-000553	SQ1	SQ1_LUNG	3.22805
ACH-000554	UACC893	UACC893_BREAST	3.01078
ACH-000555	A498	A498_KIDNEY	2.10769
ACH-000556	SIHA	SIHA_CERVIX	3.93074
ACH-000557	AML193	AML193_HAEMATOPOIETIC_AND_LYMPHOID_TISSUE	3.29866
ACH-000558	A172	A172_CENTRAL_NERVOUS_SYSTEM	3.33485
ACH-000559	NCIH1836	NCIH1836_LUNG	3.62877
ACH-000560	ECC10	ECC10_STOMACH	4.16027
ACH-000561	TDOTT	TT_OESOPHAGUS	3.64731
ACH-000562	HCC78	HCC78_LUNG	2.49825
ACH-000563	EBC1	EBC1_LUNG	3.58976
ACH-000564	KHM1B	KHM1B_HAEMATOPOIETIC_AND_LYMPHOID_TISSUE	2.73335
ACH-000565	RCM1	RCM1_LARGE_INTESTINE	3.54967
ACH-000566	SW1710	SW1710_URINARY_TRACT	3.22188
ACH-000567	ST486	ST486_HAEMATOPOIETIC_AND_LYMPHOID_TISSUE	4.26003
ACH-000568	UACC812	UACC812_BREAST	1.81147
ACH-000569	ISTMES1	ISTMES1_PLEURA	3.20945
ACH-000570	YKG1	YKG1_CENTRAL_NERVOUS_SYSTEM	2.9982
ACH-000571	T98G	T98G_CENTRAL_NERVOUS_SYSTEM	3.22959
ACH-000572	G361	G361_SKIN	3.85699
ACH-000573	MDAMB436	MDAMB436_BREAST	3.52982
ACH-000574	FUOV1	FUOV1_OVARY	4.80219
ACH-000575	HCC364	HCC364_LUNG	3.45681
ACH-000576	KMS27	KMS27_HAEMATOPOIETIC_AND_LYMPHOID_TISSUE	4.22574
ACH-000577	JHH2	JHH2_LIVER	3.19692
ACH-000578	HCC1171	HCC1171_LUNG	4.01703
ACH-000579	UACC257	UACC257_SKIN	3.35614
ACH-000580	C32	C32_SKIN	3.04439
ACH-000581	SNU16	SNU16_STOMACH	3.78136
ACH-000582	COLO741	COLO741_SKIN	3.12763
ACH-000583	MC116	MC116_HAEMATOPOIETIC_AND_LYMPHOID_TISSUE	4.01346
ACH-000584	JHOS4	JHOS4_OVARY	4.03298
ACH-000585	EPLC272H	EPLC272H_LUNG	3.32481
ACH-000586	NCIH1876	NCIH1876_LUNG	3.72792
ACH-000587	NCIH1975	NCIH1975_LUNG	3.21257
ACH-000588	KMS26	KMS26_HAEMATOPOIETIC_AND_LYMPHOID_TISSUE	4.46989
ACH-000589	NCIH1437	NCIH1437_LUNG	2.37016
ACH-000590	NCIH2073	NCIH2073_LUNG	2.30159
ACH-000591	LN235	LN235_CENTRAL_NERVOUS_SYSTEM	2.76977
ACH-000592	TM31	TM31_CENTRAL_NERVOUS_SYSTEM	3.1635
ACH-000593	BC3C	BC3C_URINARY_TRACT	3.14568
ACH-000594	DMS153	DMS153_LUNG	4.22959
ACH-000595	LN229	LN229_CENTRAL_NERVOUS_SYSTEM	3.5741
ACH-000596	LCLC97TM1	LCLC97TM1_LUNG	3.23573
ACH-000597	TTC709	TTC709_SOFT_TISSUE	3.848
ACH-000598	KMS21BM	KMS21BM_HAEMATOPOIETIC_AND_LYMPHOID_TISSUE	3.1811
ACH-000599	PATU8902	PATU8902_PANCREAS	3.05658
ACH-000600	SLR26	SLR26_KIDNEY	2.75275
ACH-000601	MIAPACA2	MIAPACA2_PANCREAS	2.81352
ACH-000602	M07E	M07E_HAEMATOPOIETIC_AND_LYMPHOID_TISSUE	4.32769
ACH-000603	BEN	BEN_LUNG	4.04439
ACH-000604	KYO1	KYO1_HAEMATOPOIETIC_AND_LYMPHOID_TISSUE	3.5097
ACH-000605	TE6	TE6_OESOPHAGUS	4.7703
ACH-000606	PECAPJ34CLONEC12	PECAPJ34CLONEC12_UPPER_AERODIGESTIVE_TRACT	2.48543
ACH-000607	KYM1	KYM1_SOFT_TISSUE	3.54967
ACH-000608	COV644	COV644_OVARY	2.69599
ACH-000609	SF126	SF126_CENTRAL_NERVOUS_SYSTEM	3.0072
ACH-000610	NCIH2227	NCIH2227_LUNG	4.41616
ACH-000611	SUDHL6	SUDHL6_HAEMATOPOIETIC_AND_LYMPHOID_TISSUE	3.78031
ACH-000612	HUT102	HUT102_HAEMATOPOIETIC_AND_LYMPHOID_TISSUE	5.35262
ACH-000613	HOS	HOS_BONE	3.99458
ACH-000614	RVH421	RVH421_SKIN	3.49825
ACH-000615	SKMEL28	SKMEL28_SKIN	2.87184
ACH-000616	HS746T	HS746T_STOMACH	3.488
ACH-000617	OVCAR4	OVCAR4_OVARY	3.51096
ACH-000618	SNU1041	SNU1041_UPPER_AERODIGESTIVE_TRACT	3.83895
ACH-000619	PECAPJ15	PECAPJ15_UPPER_AERODIGESTIVE_TRACT	2.96532
ACH-000620	JHH1	JHH1_LIVER	4.87184
ACH-000621	MDAMB157	MDAMB157_BREAST	3.24184
ACH-000622	KNS42	KNS42_CENTRAL_NERVOUS_SYSTEM	3.75489
ACH-000623	SNU201	SNU201_CENTRAL_NERVOUS_SYSTEM	2.50335
ACH-000624	HCC1806	HCC1806_BREAST	3.33628
ACH-000625	HEP3B217	HEP3B217_LIVER	4.89772
ACH-000626	U266B1	U266B1_HAEMATOPOIETIC_AND_LYMPHOID_TISSUE	4.25701
ACH-000627	LCLC103H	LCLC103H_LUNG	3.14241
ACH-000628	NCIH596	NCIH596_LUNG	3.5741
ACH-000629	IOMMLEE	IOMMLEE_CENTRAL_NERVOUS_SYSTEM	3.18903
ACH-000630	YD8	YD8_UPPER_AERODIGESTIVE_TRACT	3.66789
ACH-000631	KS1	KS1_CENTRAL_NERVOUS_SYSTEM	3.42358
ACH-000632	HS944T	HS944T_SKIN	3.58856
ACH-000633	FU97	FU97_STOMACH	4.06005
ACH-000634	LN340	LN340_CENTRAL_NERVOUS_SYSTEM	3.52105
ACH-000635	SNU119	SNU119_OVARY	3.75809
ACH-000636	RPMI8402	RPMI8402_HAEMATOPOIETIC_AND_LYMPHOID_TISSUE	4.54226
ACH-000637	KYSE520	KYSE520_OESOPHAGUS	3.60526
ACH-000638	NCIH441	NCIH441_LUNG	4.02414
ACH-000639	NCIH211	NCIH211_LUNG	3.92029
ACH-000640	SKMEL31	SKMEL31_SKIN	2.65306
ACH-000641	CMK	CMK_HAEMATOPOIETIC_AND_LYMPHOID_TISSUE	4.34341
ACH-000642	HMEL	HMEL_BREAST	3.15866
ACH-000643	HDQP1	HDQP1_BREAST	3.14893
ACH-000644	COLO829	COLO829_SKIN	2.83794
ACH-000645	JL1	JL1_PLEURA	3.66562
ACH-000646	OVMANA	OVMANA_OVARY	1.18903
ACH-000647	TE1	TE1_OESOPHAGUS	3.9222
ACH-000648	NCIH28	NCIH28_PLEURA	3.32193
ACH-000649	786O	786O_KIDNEY	3.25852
ACH-000650	IGR37	IGR37_SKIN	3.69377
ACH-000651	SW620	SW620_LARGE_INTESTINE	4.05918
ACH-000652	SUIT2	SUIT2_PANCREAS	3.66562
ACH-000653	JJN3	JJN3_HAEMATOPOIETIC_AND_LYMPHOID_TISSUE	3.35614
ACH-000654	RAJI	RAJI_HAEMATOPOIETIC_AND_LYMPHOID_TISSUE	3.64155
ACH-000655	SF268	SF268_CENTRAL_NERVOUS_SYSTEM	3.65535
ACH-000656	SUDHL8	SUDHL8_HAEMATOPOIETIC_AND_LYMPHOID_TISSUE	4.20945
ACH-000657	A2780	A2780_OVARY	4.50589
ACH-000659	SCLC21H	SCLC21H_LUNG	3.34056
ACH-000660	SUDHL5	SUDHL5_HAEMATOPOIETIC_AND_LYMPHOID_TISSUE	3.69488
ACH-000661	WM1799	WM1799_SKIN	3.14731
ACH-000662	CORL23	CORL23_LUNG	3.20945
ACH-000663	OVTOKO	OVTOKO_OVARY	1.58496
ACH-000664	SUDHL1	SUDHL1_HAEMATOPOIETIC_AND_LYMPHOID_TISSUE	4.26978
ACH-000665	SKMES1	SKMES1_LUNG	3.09085
ACH-000666	NCIH1355	NCIH1355_LUNG	2.79701
ACH-000667	HCC44	HCC44_LUNG	2.81558
ACH-000668	HCC70	HCC70_BREAST	3.05137
ACH-000669	SW900	SW900_LUNG	3.22959
ACH-000670	SBC5	SBC5_LUNG	3.52982
ACH-000671	HUH6	HUH6_LIVER	4.02768
ACH-000672	IALM	IALM_LUNG	2.92029
ACH-000673	LN443	LN443_CENTRAL_NERVOUS_SYSTEM	3.37295
ACH-000674	NUGC4	NUGC4_STOMACH	3.12598
ACH-000675	NCIH1734	NCIH1734_LUNG	3.97177
ACH-000676	LN464	LN464_CENTRAL_NERVOUS_SYSTEM	3.1811
ACH-000677	SW1573	SW1573_LUNG	3.65878
ACH-000678	MKN7	MKN7_STOMACH	3.2765
ACH-000679	OE19	OE19_OESOPHAGUS	3.38819
ACH-000680	SW948	SW948_LARGE_INTESTINE	3.5373
ACH-000681	A549	A549_LUNG	2.85599
ACH-000682	SNU1066	SNU1066_UPPER_AERODIGESTIVE_TRACT	3.24489
ACH-000683	SNU503	SNU503_LARGE_INTESTINE	4.07211
ACH-000684	KMRC1	KMRC1_KIDNEY	1.41143
ACH-000685	L33	L33_PANCREAS	2.82985
ACH-000686	SNU878	SNU878_LIVER	2.79909
ACH-000687	CI1	CI1_HAEMATOPOIETIC_AND_LYMPHOID_TISSUE	3.72356
ACH-000688	OV7	OV7_OVARY	2.80941
ACH-000689	RH18	RH18_SOFT_TISSUE	3.5097
ACH-000690	HCC2814	HCC2814_LUNG	3.96901
ACH-000691	HCC2157	HCC2157_BREAST	3.39232
ACH-000692	SNU899	SNU899_UPPER_AERODIGESTIVE_TRACT	4.09001
ACH-000693	KYSE180	KYSE180_OESOPHAGUS	3.89433
ACH-000694	TE9	TE9_OESOPHAGUS	3.5008
ACH-000695	CORL47	CORL47_LUNG	2.99458
ACH-000696	OVCAR8	OVCAR8_OVARY	3.3505
ACH-000697	A3KAW	A3KAW_HAEMATOPOIETIC_AND_LYMPHOID_TISSUE	4.44956
ACH-000698	DMS53	DMS53_LUNG	4.20398
ACH-000699	HCC1395	HCC1395_BREAST	2.33628
ACH-000700	NCIH2882	NCIH2882_LUNG	3.46989
ACH-000701	RMUGS	RMUGS_OVARY	3.43696
ACH-000702	L1236	L1236_HAEMATOPOIETIC_AND_LYMPHOID_TISSUE	4.81301
ACH-000703	DMS79	DMS79_LUNG	4.21179
ACH-000704	OAW42	OAW42_OVARY	2.46989
ACH-000705	LC1F	LC1F_LUNG	4.30378
ACH-000706	EKVX	EKVX_LUNG	2.76553
ACH-000707	P3HR1	P3HR1_HAEMATOPOIETIC_AND_LYMPHOID_TISSUE	4.31542
ACH-000708	SNU283	SNU283_LARGE_INTESTINE	4.72301
ACH-000709	KMRC2	KMRC2_KIDNEY	2.27798
ACH-000710	NCIH854	NCIH854_LUNG	4.27798
ACH-000711	JIMT1	JIMT1_BREAST	3.90207
ACH-000712	HCC1833	HCC1833_LUNG	4.03298
ACH-000713	CAOV3	CAOV3_OVARY	2.88362
ACH-000714	KMS11	KMS11_HAEMATOPOIETIC_AND_LYMPHOID_TISSUE	4.15623
ACH-000715	SNU1214	SNU1214_UPPER_AERODIGESTIVE_TRACT	3.47897
ACH-000716	TT2609C02	TT2609C02_THYROID	3.02857
ACH-000717	COLO680N	COLO680N_OESOPHAGUS	3.92029
ACH-000718	NCIH2291	NCIH2291_LUNG	3.2032
ACH-000719	RMGI	RMGI_OVARY	2.488
ACH-000720	TCCSUP	TCCSUP_URINARY_TRACT	3.29131
ACH-000721	HMC18	HMC18_BREAST	2.64386
ACH-000722	SNUC1	SNUC1_LARGE_INTESTINE	3.43962
ACH-000723	YD10B	YD10B_UPPER_AERODIGESTIVE_TRACT	2.76129
ACH-000724	HT1376	HT1376_URINARY_TRACT	3.44758
ACH-000725	HCC202	HCC202_BREAST	3.24184
ACH-000726	TE14	TE14_OESOPHAGUS	3.45943
ACH-000728	KASUMI2	KASUMI2_HAEMATOPOIETIC_AND_LYMPHOID_TISSUE	4.1035
ACH-000729	NCIH1963	NCIH1963_LUNG	4.16189
ACH-000730	SKMEL5	SKMEL5_SKIN	3.23266
ACH-000731	HCC2279	HCC2279_LUNG	3.1635
ACH-000732	PECAPJ41CLONED2	PECAPJ41CLONED2_UPPER_AERODIGESTIVE_TRACT	2.1177
ACH-000733	NCIH1838	NCIH1838_LUNG	3.82171
ACH-000734	JHH5	JHH5_LIVER	4.72792
ACH-000735	PECAPJ49	PECAPJ49_UPPER_AERODIGESTIVE_TRACT	2.85
ACH-000736	SNU601	SNU601_STOMACH	3.62761
ACH-000737	NCIH1385	NCIH1385_LUNG	3.63459
ACH-000738	GB1	GB1_CENTRAL_NERVOUS_SYSTEM	3.70819
ACH-000739	HEPG2	HEPG2_LIVER	4.78346
ACH-000740	A253	A253_SALIVARY_GLAND	3.67582
ACH-000741	UBLC1	UBLC1_URINARY_TRACT	2.7866
ACH-000742	DM3	DM3_FIBROBLAST	2.18903
ACH-000743	CORL95	CORL95_LUNG	4.35544
ACH-000744	NCIH1623	NCIH1623_LUNG	4.01167
ACH-000745	MOLP8	MOLP8_HAEMATOPOIETIC_AND_LYMPHOID_TISSUE	4.21412
ACH-000746	GSS	GSS_STOMACH	4.88899
ACH-000747	NCIH1703	NCIH1703_LUNG	3.59694
ACH-000748	SJSA1	SJSA1_BONE	3.05137
ACH-000749	DMS273	DMS273_LUNG	3.46467
ACH-000750	LOXIMVI	LOXIMVI_SKIN	3.30159
ACH-000751	OCIM1	OCIM1_HAEMATOPOIETIC_AND_LYMPHOID_TISSUE	3.35755
ACH-000752	NCIH196	NCIH196_LUNG	3.37295
ACH-000753	JMSU1	JMSU1_URINARY_TRACT	4.1035
ACH-000754	L428	L428_HAEMATOPOIETIC_AND_LYMPHOID_TISSUE	3.27798
ACH-000755	HCC2218	HCC2218_BREAST	2.49313
ACH-000756	GI1	GI1_CENTRAL_NERVOUS_SYSTEM	3.65306
ACH-000757	A427	A427_LUNG	3.26604
ACH-000758	MKN74	MKN74_STOMACH	5.32589
ACH-000759	MDAMB175VII	MDAMB175VII_BREAST	3.72901
ACH-000760	LNZ308	LNZ308_CENTRAL_NERVOUS_SYSTEM	2.81762
ACH-000761	NUGC2	NUGC2_STOMACH	3.81455
ACH-000762	YD38	YD38_UPPER_AERODIGESTIVE_TRACT	3.43162
ACH-000763	MM1S	MM1S_HAEMATOPOIETIC_AND_LYMPHOID_TISSUE	3.43829
ACH-000764	SH10TC	SH10TC_STOMACH	2.82985
ACH-000765	WM983B	WM983B_SKIN	3.87578
ACH-000766	NCIH1648	NCIH1648_LUNG	4.21023
ACH-000767	NCIH526	NCIH526_LUNG	4.69877
ACH-000768	MDAMB231	MDAMB231_BREAST	3.67356
ACH-000769	LK2	LK2_LUNG	4.23189
ACH-000770	P31FUJ	P31FUJ_HAEMATOPOIETIC_AND_LYMPHOID_TISSUE	4.86691
ACH-000771	BICR56	BICR56_UPPER_AERODIGESTIVE_TRACT	2.60407
ACH-000772	TE441T	TE441T_SOFT_TISSUE	3.03914
ACH-000773	KIJK	KIJK_HAEMATOPOIETIC_AND_LYMPHOID_TISSUE	3.86493
ACH-000774	RERFLCAD2	RERFLCAD2_LUNG	3.05658
ACH-000775	NCIH727	NCIH727_LUNG	4.54659
ACH-000776	ONS76	ONS76_CENTRAL_NERVOUS_SYSTEM	3.69711
ACH-000777	KYSE30	KYSE30_OESOPHAGUS	3.59813
ACH-000778	HSC3	HSC3_UPPER_AERODIGESTIVE_TRACT	3.05832
ACH-000779	PC9	PC9_LUNG	3.18269
ACH-000780	NCIH1105	NCIH1105_LUNG	3.82985
ACH-000781	NCIH2023	NCIH2023_LUNG	2.79286
ACH-000782	SEM	SEM_HAEMATOPOIETIC_AND_LYMPHOID_TISSUE	3.90977
ACH-000783	CAMA1	CAMA1_BREAST	3.01792
ACH-000784	KYSE70	KYSE70_OESOPHAGUS	3.01436
ACH-000785	NCIH2126	NCIH2126_LUNG	3.52356
ACH-000786	DAUDI	DAUDI_HAEMATOPOIETIC_AND_LYMPHOID_TISSUE	3.61589
ACH-000787	LXF289	LXF289_LUNG	2.40871
ACH-000788	A2058	A2058_SKIN	3.36877
ACH-000789	NCIH810	NCIH810_LUNG	4.75756
ACH-000790	SHP77	SHP77_LUNG	2.98914
ACH-000791	RERFLCAD1	RERFLCAD1_LUNG	3.3147
ACH-000792	BFTC909	BFTC909_KIDNEY	2.5656
ACH-000793	KATOIII	KATOIII_STOMACH	3.81865
ACH-000794	BICR22	BICR22_UPPER_AERODIGESTIVE_TRACT	2.99458
ACH-000796	MCAS	MCAS_OVARY	2.80116
ACH-000797	HLFA	HLFA_FIBROBLAST	2.43829
ACH-000798	CL40	CL40_LARGE_INTESTINE	3.53107
ACH-000799	HS695T	HS695T_SKIN	2.98185
ACH-000800	NCIH446	NCIH446_LUNG	3.41414
ACH-000801	HS936T	HS936T_SKIN	3.25399
ACH-000802	BFTC905	BFTC905_URINARY_TRACT	4.53045
ACH-000803	COLO668	COLO668_LUNG	3.91552
ACH-000804	NB1	NB1_AUTONOMIC_GANGLIA	3.20163
ACH-000805	COLO679	COLO679_SKIN	3.71149
ACH-000806	L540	L540_HAEMATOPOIETIC_AND_LYMPHOID_TISSUE	4.3978
ACH-000807	SNU738	SNU738_CENTRAL_NERVOUS_SYSTEM	4.54659
ACH-000808	HUH28	HUH28_BILIARY_TRACT	3.10769
ACH-000809	KYSE410	KYSE410_OESOPHAGUS	3.09761
ACH-000810	SKMEL30	SKMEL30_SKIN	3.44758
ACH-000811	SKOV3	SKOV3_OVARY	2.79286
ACH-000812	COLO783	COLO783_SKIN	4.27128
ACH-000813	T3M10	T3M10_LUNG	3.42895
ACH-000814	HS939T	HS939T_SKIN	3.36597
ACH-000815	KMH2	KMH2_HAEMATOPOIETIC_AND_LYMPHOID_TISSUE	3.32912
ACH-000816	NCIH524	NCIH524_LUNG	3.28392
ACH-000817	RPMI8226	RPMI8226_HAEMATOPOIETIC_AND_LYMPHOID_TISSUE	2.7137
ACH-000818	BT483	BT483_BREAST	4.0993
ACH-000819	LN18	LN18_CENTRAL_NERVOUS_SYSTEM	3.86493
ACH-000820	SW403	SW403_LARGE_INTESTINE	4.20085
ACH-000821	EJM	EJM_HAEMATOPOIETIC_AND_LYMPHOID_TISSUE	4.08066
ACH-000822	SKMEL24	SKMEL24_SKIN	2.72247
ACH-000823	KYSE140	KYSE140_OESOPHAGUS	3.60999
ACH-000824	KYSE510	KYSE510_OESOPHAGUS	3.55704
ACH-000825	HOP92	HOP92_LUNG	3.30889
ACH-000826	CAL12T	CAL12T_LUNG	3.72574
ACH-000827	WM793	WM793_SKIN	3.31179
ACH-000828	ZR7530	ZR7530_BREAST	2.95233
ACH-000829	HUNS1	HUNS1_HAEMATOPOIETIC_AND_LYMPHOID_TISSUE	3.60288
ACH-000830	NCIH1436	NCIH1436_LUNG	3.70929
ACH-000831	HEC50B	HEC50B_ENDOMETRIUM	3.45812
ACH-000832	CAL27	CAL27_UPPER_AERODIGESTIVE_TRACT	2.7866
ACH-000833	RH30	RH30_SOFT_TISSUE	4.61824
ACH-000834	UMUC1	UMUC1_URINARY_TRACT	3.6241
ACH-000835	GCT	GCT_SOFT_TISSUE	3.51979
ACH-000836	YD15	YD15_SALIVARY_GLAND	3.03738
ACH-000837	NCIH322	NCIH322_LUNG	3.49825
ACH-000838	AMO1	AMO1_HAEMATOPOIETIC_AND_LYMPHOID_TISSUE	4.13422
ACH-000839	SCABER	SCABER_URINARY_TRACT	2.70044
ACH-000840	HCC366	HCC366_LUNG	3.76871
ACH-000841	NCIH2087	NCIH2087_LUNG	4.1643
ACH-000842	SW480	SW480_LARGE_INTESTINE	2.68706
ACH-000843	HARA	HARA_LUNG	3.16027
ACH-000844	DMS454	DMS454_LUNG	4.1177
ACH-000845	NCIH1373	NCIH1373_LUNG	2.40599
ACH-000846	FADU	FADU_UPPER_AERODIGESTIVE_TRACT	3.28244
ACH-000847	HGC27	HGC27_STOMACH	3.09761
ACH-000848	JHH7	JHH7_LIVER	4.85449
ACH-000849	MDAMB468	MDAMB468_BREAST	3.53481
ACH-000850	HS698T	HS698T_FIBROBLAST	2.34199
ACH-000851	MORCPR	MORCPR_LUNG	3.52105
ACH-000852	NCIH1435	NCIH1435_LUNG	3.48671
ACH-000853	NCIH661	NCIH661_LUNG	4.65363
ACH-000854	OCIMY5	OCIMY5_HAEMATOPOIETIC_AND_LYMPHOID_TISSUE	1.68257
ACH-000855	KYSE150	KYSE150_OESOPHAGUS	3.29131
ACH-000856	CAL51	CAL51_BREAST	3.92884
ACH-000857	CAL851	CAL851_BREAST	2.64386
ACH-000858	KNS62	KNS62_LUNG	2.87381
ACH-000859	HCC1954	HCC1954_BREAST	3.13258
ACH-000860	NCIH358	NCIH358_LUNG	3.26604
ACH-000861	HOP62	HOP62_LUNG	3.55213
ACH-000862	KMBC2	KMBC2_URINARY_TRACT	5.84499
ACH-000863	DBTRG05MG	DBTRG05MG_CENTRAL_NERVOUS_SYSTEM	3.21101
ACH-000864	COLO684	COLO684_ENDOMETRIUM	3.91934
ACH-000865	KYSE450	KYSE450_OESOPHAGUS	3.55582
ACH-000866	NCIH1048	NCIH1048_LUNG	4.05398
ACH-000867	CHAGOK1	CHAGOK1_LUNG	3.53232
ACH-000868	HCC1195	HCC1195_LUNG	4.76818
ACH-000869	NCIH1568	NCIH1568_LUNG	3.84097
ACH-000870	NCIH1930	NCIH1930_LUNG	4.80116
ACH-000871	NCIH510	NCIH510_LUNG	4.29352
ACH-000872	HCC515	HCC515_LUNG	3.33342
ACH-000873	KYSE270	KYSE270_OESOPHAGUS	3.09761
ACH-000874	RS411	RS411_HAEMATOPOIETIC_AND_LYMPHOID_TISSUE	2.34767
ACH-000875	NCIH2347	NCIH2347_LUNG	3.35896
ACH-000876	MDAMB415	MDAMB415_BREAST	3.13258
ACH-000877	EB1	EB1_HAEMATOPOIETIC_AND_LYMPHOID_TISSUE	4.25852
ACH-000878	HCC15	HCC15_LUNG	3.31034
ACH-000879	MFE296	MFE296_ENDOMETRIUM	3.43429
ACH-000880	AGS	AGS_STOMACH	4.47444
ACH-000881	MELJUSO	MELJUSO_SKIN	3.43962
ACH-000882	IGR1	IGR1_SKIN	2.8339
ACH-000883	SW1783	SW1783_CENTRAL_NERVOUS_SYSTEM	2.54597
ACH-000884	MDAMB435S	MDAMB435S_SKIN	2.79077
ACH-000885	TOV21G	TOV21G_OVARY	3.16189
ACH-000886	NCIH2009	NCIH2009_LUNG	3.65421
ACH-000887	SF172	SF172_CENTRAL_NERVOUS_SYSTEM	3.12928
ACH-000888	NCIH1793	NCIH1793_LUNG	3.63227
ACH-000889	KMM1	KMM1_HAEMATOPOIETIC_AND_LYMPHOID_TISSUE	4.73985
ACH-000890	SW1271	SW1271_LUNG	4.17153
ACH-000891	HCC1438	HCC1438_LUNG	4.33628
ACH-000892	NCIH1563	NCIH1563_LUNG	2.67807
ACH-000893	NCIH1651	NCIH1651_LUNG	4.1102
ACH-000894	NCIH1869	NCIH1869_LUNG	2.60881
ACH-000895	CL34	CL34_LARGE_INTESTINE	2.94111
ACH-000896	647V	647V_URINARY_TRACT	4.16269
ACH-000897	FTC238	FTC238_THYROID	3.59694
ACH-000898	SNU719	SNU719_STOMACH	3.91743
ACH-000899	WM88	WM88_SKIN	3.80941
ACH-000900	NCIH23	NCIH23_LUNG	3.38405
ACH-000901	HCC1359	HCC1359_LUNG	3.71809
ACH-000902	CAL148	CAL148_BREAST	3.36457
ACH-000903	FTC133	FTC133_THYROID	2.49313
ACH-000904	NCIH2106	NCIH2106_LUNG	3.23266
ACH-000905	5637	5637_URINARY_TRACT	4.39025
ACH-000906	ES2	ES2_OVARY	3.07724
ACH-000907	SNU349	SNU349_KIDNEY	2.26303
ACH-000908	SNU520	SNU520_STOMACH	3.20945
ACH-000909	JHUEM2	JHUEM2_ENDOMETRIUM	2.97453
ACH-000910	MDAMB453	MDAMB453_BREAST	3.18745
ACH-000911	NUGC3	NUGC3_STOMACH	3.15218
ACH-000912	NCIH2286	NCIH2286_LUNG	3.83086
ACH-000913	ESS1	ESS1_ENDOMETRIUM	3.5435
ACH-000914	HT	HT_HAEMATOPOIETIC_AND_LYMPHOID_TISSUE	4.26529
ACH-000915	IPC298	IPC298_SKIN	2.59694
ACH-000916	NCIH1573	NCIH1573_LUNG	3.24336
ACH-000917	TE4	TE4_OESOPHAGUS	4.3799
ACH-000918	MOLT16	MOLT16_HAEMATOPOIETIC_AND_LYMPHOID_TISSUE	3.70708
ACH-000919	IM95	IM95_STOMACH	2.63459
ACH-000920	CMLT1	CMLT1_HAEMATOPOIETIC_AND_LYMPHOID_TISSUE	4.49442
ACH-000921	NCIH1339	NCIH1339_LUNG	4.01614
ACH-000922	RCHACV	RCHACV_HAEMATOPOIETIC_AND_LYMPHOID_TISSUE	3.95791
ACH-000923	BCP1	BCP1_HAEMATOPOIETIC_AND_LYMPHOID_TISSUE	4.62527
ACH-000924	NCIH2172	NCIH2172_LUNG	3.56071
ACH-000925	DV90	DV90_LUNG	2.86394
ACH-000926	HT55	HT55_LARGE_INTESTINE	4.89724
ACH-000927	BT474	BT474_BREAST	3.59335
ACH-000928	JHUEM1	JHUEM1_ENDOMETRIUM	3.45681
ACH-000929	NCIH2110	NCIH2110_LUNG	2.96347
ACH-000930	HCC1569	HCC1569_BREAST	4.41143
ACH-000931	HMCB	HMCB_SKIN	3.68594
ACH-000932	SNU1	SNU1_STOMACH	3.57046
ACH-000933	SNU324	SNU324_PANCREAS	3.08406
ACH-000934	MDAMB361	MDAMB361_BREAST	3.7301
ACH-000935	MDST8	MDST8_LARGE_INTESTINE	4.05918
ACH-000936	EFO27	EFO27_OVARY	3.46205
ACH-000937	PF382	PF382_HAEMATOPOIETIC_AND_LYMPHOID_TISSUE	4.61883
ACH-000938	NALM6	NALM6_HAEMATOPOIETIC_AND_LYMPHOID_TISSUE	3.84398
ACH-000939	SKUT1	SKUT1_SOFT_TISSUE	3.8885
ACH-000940	AN3CA	AN3CA_ENDOMETRIUM	3.40735
ACH-000941	HEC1B	HEC1B_ENDOMETRIUM	2.34483
ACH-000942	HPBALL	HPBALL_HAEMATOPOIETIC_AND_LYMPHOID_TISSUE	4.19692
ACH-000943	RKO	RKO_LARGE_INTESTINE	3.27352
ACH-000944	NAMALWA	NAMALWA_HAEMATOPOIETIC_AND_LYMPHOID_TISSUE	3.74093
ACH-000945	NCIH650	NCIH650_LUNG	3.91648
ACH-000946	HEC265	HEC265_ENDOMETRIUM	3.46597
ACH-000947	OVK18	OVK18_OVARY	4.16108
ACH-000948	2313287	2313287_STOMACH	3.10769
ACH-000949	TGBC11TKB	TGBC11TKB_STOMACH	2.70044
ACH-000950	LOVO	LOVO_LARGE_INTESTINE	2.98914
ACH-000951	NCIH2342	NCIH2342_LUNG	3.43563
ACH-000952	MDAPCA2B	MDAPCA2B_PROSTATE	3.35896
ACH-000953	SUPT1	SUPT1_HAEMATOPOIETIC_AND_LYMPHOID_TISSUE	4.43962
ACH-000954	HEC1A	HEC1A_ENDOMETRIUM	3.42492
ACH-000955	SNU407	SNU407_LARGE_INTESTINE	3.1375
ACH-000956	22RV1	22RV1_PROSTATE	3.10266
ACH-000957	LS180	LS180_LARGE_INTESTINE	3.67694
ACH-000958	SW48	SW48_LARGE_INTESTINE	3.62293
ACH-000959	SNUC4	SNUC4_LARGE_INTESTINE	4.33128
ACH-000960	REH	REH_HAEMATOPOIETIC_AND_LYMPHOID_TISSUE	4.2765
ACH-000961	ISHIKAWAHERAKLIO02ER	ISHIKAWAHERAKLIO02ER_ENDOMETRIUM	3.48671
ACH-000962	OC314	OC314_OVARY	3.0321
ACH-000963	CCK81	CCK81_LARGE_INTESTINE	3.65306
ACH-000964	MOLT3	MOLT3_HAEMATOPOIETIC_AND_LYMPHOID_TISSUE	3.7666
ACH-000965	RL952	RL952_ENDOMETRIUM	3.09255
ACH-000966	IGROV1	IGROV1_OVARY	3.90304
ACH-000967	SNUC2A	SNUC2A_LARGE_INTESTINE	3.06178
ACH-000968	COLO792	COLO792_SKIN	3.34341
ACH-000969	KM12	KM12_LARGE_INTESTINE	2.59216
ACH-000970	SNUC5	SNUC5_LARGE_INTESTINE	3.51475
ACH-000971	HCT116	HCT116_LARGE_INTESTINE	4.07382
ACH-000972	HEC151	HEC151_ENDOMETRIUM	3.04614
ACH-000973	639V	639V_URINARY_TRACT	3.52607
ACH-000974	SNGM	SNGM_ENDOMETRIUM	3.03034
ACH-000975	HCC2450	HCC2450_LUNG	3.37434
ACH-000976	HUCCT1	HUCCT1_BILIARY_TRACT	2.14731
ACH-000977	LNCAPCLONEFGC	LNCAPCLONEFGC_PROSTATE	2.96162
ACH-000978	EN	EN_ENDOMETRIUM	3.67243
ACH-000980	NCIH1155	NCIH1155_LUNG	3.09255
ACH-000981	DND41	DND41_HAEMATOPOIETIC_AND_LYMPHOID_TISSUE	4.91409
ACH-000982	GP2D	GP2D_LARGE_INTESTINE	4.18982
ACH-000983	KCL22	KCL22_HAEMATOPOIETIC_AND_LYMPHOID_TISSUE	3.99367
ACH-000984	HEC6	HEC6_ENDOMETRIUM	3.68706
ACH-000985	LS411N	LS411N_LARGE_INTESTINE	3.17951
ACH-000986	HT115	HT115_LARGE_INTESTINE	3.0018
ACH-000987	MEWO	MEWO_SKIN	3.30159
ACH-000988	MFE319	MFE319_ENDOMETRIUM	2.82985
ACH-000989	SNU175	SNU175_LARGE_INTESTINE	3.09424
ACH-000990	HEC108	HEC108_ENDOMETRIUM	3.47638
ACH-000991	SNU81	SNU81_LARGE_INTESTINE	4.19456
ACH-000993	JHUEM7	JHUEM7_ENDOMETRIUM	2.852
ACH-000994	HEC59	HEC59_ENDOMETRIUM	3.0197
ACH-000995	JURKAT	JURKAT_HAEMATOPOIETIC_AND_LYMPHOID_TISSUE	4.17871
ACH-000996	HEC251	HEC251_ENDOMETRIUM	3.46858
ACH-000997	HCT15	HCT15_LARGE_INTESTINE	3.72028
ACH-000998	CW2	CW2_LARGE_INTESTINE	3.46597
ACH-000999	SNU1040	SNU1040_LARGE_INTESTINE	3.70929
ACH-001001	143B	143B_BONE	4.22188
ACH-001016	BECKER	BECKER_CENTRAL_NERVOUS_SYSTEM	3.62176
ACH-001020	BT16	BT16_SOFT_TISSUE	2.74201
ACH-001022	CBAGPN	CBAGPN_BONE	3.96347
ACH-001028	CHLA06ATRT	CHLA06ATRT_SOFT_TISSUE	1.83592
ACH-001029	CHLA10	CHLA10_BONE	4.00809
ACH-001030	CHLA218	CHLA218_BONE	3.50589
ACH-001031	CHLA266	CHLA266_SOFT_TISSUE	3.56071
ACH-001032	CHLA32	CHLA32_BONE	3.50843
ACH-001033	CHLA57	CHLA57_BONE	2.88362
ACH-001034	CHLA9	CHLA9_BONE	3.12763
ACH-001035	CHLA99	CHLA99_BONE	3.17951
ACH-001036	CMK115	CMK115_HAEMATOPOIETIC_AND_LYMPHOID_TISSUE	3.904
ACH-001038	COGE352	COGE352_BONE	3.48156
ACH-001041	COLO699	COLO699_LUNG	2.94486
ACH-001048	COV504	COV504_OVARY	3.61353
ACH-001050	CW9019	CW9019_SOFT_TISSUE	3.21878
ACH-001053	D425	D425_CENTRAL_NERVOUS_SYSTEM	3.10936
ACH-001054	D458	D458_CENTRAL_NERVOUS_SYSTEM	3.55213
ACH-001057	DERL2	DERL2_HAEMATOPOIETIC_AND_LYMPHOID_TISSUE	2.96347
ACH-001059	DL	DL_SOFT_TISSUE	3.79805
ACH-001060	DL40	DL40_HAEMATOPOIETIC_AND_LYMPHOID_TISSUE	4.40735
ACH-001061	DLD1	DLD1_LARGE_INTESTINE	3.28836
ACH-001067	F5	F5_CENTRAL_NERVOUS_SYSTEM	3.30889
ACH-001068	FEPD	FEPD_HAEMATOPOIETIC_AND_LYMPHOID_TISSUE	3.09255
ACH-001075	NCIH292	NCIH292_LUNG	3.20163
ACH-001086	HELA	HELA_CERVIX	2.62761
ACH-001096	JR	JR_SOFT_TISSUE	2.46728
ACH-001097	KARPAS384	KARPAS384_HAEMATOPOIETIC_AND_LYMPHOID_TISSUE	2.88947
ACH-001098	KCIMOH1	KCIMOH1_PANCREAS	2.70929
ACH-001099	KD	KD_SOFT_TISSUE	2.75702
ACH-001100	KHYG	KHYG_HAEMATOPOIETIC_AND_LYMPHOID_TISSUE	1.49057
ACH-001106	KOPN8	KOPN8_HAEMATOPOIETIC_AND_LYMPHOID_TISSUE	3.95699
ACH-001109	KPMRTRY	KPMRTRY_SOFT_TISSUE	2.74846
ACH-001111	L82	L82_HAEMATOPOIETIC_AND_LYMPHOID_TISSUE	1.97453
ACH-001113	LC1SQSF	LC1SQSF_LUNG	4.04177
ACH-001119	MAC2A	MAC2A_HAEMATOPOIETIC_AND_LYMPHOID_TISSUE	4.69822
ACH-001128	MON	MON_SOFT_TISSUE	3.52857
ACH-001129	MONOMAC1	MONOMAC1_HAEMATOPOIETIC_AND_LYMPHOID_TISSUE	4.12928
ACH-001132	MTA	MTA_HAEMATOPOIETIC_AND_LYMPHOID_TISSUE	4.16752
ACH-001134	MYLA	MYLA_HAEMATOPOIETIC_AND_LYMPHOID_TISSUE	2.45681
ACH-001142	NHAHTDD	NHAHTDD_PRIMARY	2.68032
ACH-001145	OC316	OC316_OVARY	3.83794
ACH-001147	OCILY12	OCILY12_HAEMATOPOIETIC_AND_LYMPHOID_TISSUE	3.12928
ACH-001148	OCILY132	OCILY132_HAEMATOPOIETIC_AND_LYMPHOID_TISSUE	4.75862
ACH-001151	OVCAR5	OVCAR5_OVARY	2.86987
ACH-001163	CCLFPEDS0001T	PEDS005TSUSP_KIDNEY	2.48027
ACH-001164	CCLFPEDS0003T	CCLFPEDS0003T_SOFT_TISSUE	2.28688
ACH-001172	U251MGDM		3.32912
ACH-001183	RT11284	RT11284_URINARY_TRACT	3.62527
ACH-001184	SCMCRM2	SCMCRM2_SOFT_TISSUE	3.44095
ACH-001190	SKMEL2	SKMEL2_SKIN	3.73769
ACH-001192	SKNEP1	SKNEP1_BONE	4.56071
ACH-001193	SKPNDW	SKPNDW_BONE	3.9514
ACH-001194	SKRC31	SKRC31_KIDNEY	2.85798
ACH-001196	SMSCTR	SMSCTR_SOFT_TISSUE	3.28392
ACH-001197	SMZ1	SMZ1_HAEMATOPOIETIC_AND_LYMPHOID_TISSUE	3.67356
ACH-001200	STM9101	STM9101_SOFT_TISSUE	2.82375
ACH-001201	SUMB002	SUMB002_CENTRAL_NERVOUS_SYSTEM	3.61353
ACH-001207	TIG3TD	TIG3TD_FIBROBLAST	2.86394
ACH-001210	TTC1240	TTC1240_SOFT_TISSUE	3.49825
ACH-001211	TTC549	TTC549_SOFT_TISSUE	4.05137
ACH-001228	UPCISCC152	UPCISCC152_UPPER_AERODIGESTIVE_TRACT	3.97636
ACH-001229	UPCISCC154	UPCISCC154_UPPER_AERODIGESTIVE_TRACT	3.07211
ACH-001232	UW228	UW228_CENTRAL_NERVOUS_SYSTEM	2.92029
ACH-001239	WM2664	WM2664_SKIN	3.01436
ACH-001270	127399	127399_SOFT_TISSUE	3.37712
ACH-001274	SW982	SW982_SOFT_TISSUE	3.10601
ACH-001275	SYO1	SYO1_SOFT_TISSUE	3.23419
ACH-001277	YAMATO	YAMATO_SOFT_TISSUE	3.62527
ACH-001278	BIN67	BIN67_OVARY	3.46336
ACH-001279	SCCOHT1	SCCOHT1_OVARY	3.81147
ACH-001280	SCS214	SCS214_SOFT_TISSUE	2.88362
ACH-001283	TC106	TC106_BONE	3.41549
ACH-001289	COGAR359	COGAR359_SOFT_TISSUE	3.25399
ACH-001295	Y79	Y79_AUTONOMIC_GANGLIA	3.85499
ACH-001300	CHLA15	CHLA15_AUTONOMIC_GANGLIA	2.81967
ACH-001301	COGN278	COGN278_AUTONOMIC_GANGLIA	3.58976
ACH-001302	COGN305	COGN305_AUTONOMIC_GANGLIA	3.15381
ACH-001303	NB1643	NB1643_AUTONOMIC_GANGLIA	2.88362
ACH-001306	8305C	8305C_THYROID	3.53854
ACH-001307	8505C	8505C_THYROID	3.74631
ACH-001310	HA1E	HA1E_KIDNEY	3.6837
ACH-001318	PLCPRF5	PLCPRF5_LIVER	3.79077
ACH-001321	TT	TT_THYROID	3.16511
ACH-001322	CME1	CME1_SOFT_TISSUE	3.12267
ACH-001328	A431	A431_SKIN	2.57046
ACH-001329	ANGMCSS	ANGMCSS_CENTRAL_NERVOUS_SYSTEM	3.1375
ACH-001332	BICR78	BICR78_UPPER_AERODIGESTIVE_TRACT	2.80529
ACH-001333	C33A	C33A_CERVIX	4.14405
ACH-001334	C4I	C4I_CERVIX	2.75916
ACH-001335	C4II	C4II_CERVIX	2.48027
ACH-001336	CASKI	CASKI_CERVIX	2.4489
ACH-001339	COLO794	COLO794_SKIN	3.01792
ACH-001340	COV413A	COV413A_OVARY	2.80735
ACH-001341	DOTC24510	DOTC24510_CERVIX	3.53854
ACH-001344	GIMEN	GIMEN_AUTONOMIC_GANGLIA	3.0268
ACH-001345	GP5D	GP5D_LARGE_INTESTINE	3.03738
ACH-001346	H103	H103_UPPER_AERODIGESTIVE_TRACT	3.56438
ACH-001347	H157	H157_UPPER_AERODIGESTIVE_TRACT	2.52857
ACH-001353	JOPACA1	JOPACA1_PANCREAS	2.18269
ACH-001354	LAN2	LAN2_AUTONOMIC_GANGLIA	2.99095
ACH-001356	MB1	MB1_THYROID	3.60881
ACH-001360	MS751	MS751_CERVIX	2.11437
ACH-001366	NGP	NGP_AUTONOMIC_GANGLIA	4.44493
ACH-001367	NMB	NMB_AUTONOMIC_GANGLIA	4.49825
ACH-001368	OACM51	OACM51_OESOPHAGUS	2.68032
ACH-001369	OCIC5X	OCIC5X_OVARY	2.06695
ACH-001370	OCIP5X	OCIP5X_OVARY	2.17951
ACH-001373	OV17R	OV17R_OVARY	3.61471
ACH-001374	PA1	PA1_OVARY	3.86493
ACH-001375	PACADD119	PACADD119_PANCREAS	3.55336
ACH-001376	PACADD135	PACADD135_PANCREAS	2.30159
ACH-001377	PACADD137	PACADD137_PANCREAS	3.37156
ACH-001378	PACADD159	PACADD159_PANCREAS	1.60881
ACH-001379	PACADD161	PACADD161_PANCREAS	3.09255
ACH-001380	PACADD165	PACADD165_PANCREAS	3.31034
ACH-001382	PACADD188	PACADD188_PANCREAS	2.09761
ACH-001384	RO82W1	RO82W1_THYROID	2.16027
ACH-001385	RPMI2650	RPMI2650_UPPER_AERODIGESTIVE_TRACT	2.69599
ACH-001386	SCLC22H	SCLC22H_LUNG	4.10098
ACH-001388	SUM102PT	SUM102PT_BREAST	0.790772
ACH-001389	SUM1315MO2	SUM1315MO2_BREAST	3.05311
ACH-001390	SUM149PT	SUM149PT_BREAST	2.0321
ACH-001391	SUM159PT	SUM159PT_BREAST	2.74631
ACH-001392	SUM185PE	SUM185PE_BREAST	3.68706
ACH-001394	SUM229PE	SUM229PE_BREAST	2.9241
ACH-001395	SUM44PE	SUM44PE_BREAST	1.43296
ACH-001396	SUM52PE	SUM52PE_BREAST	2.36737
ACH-001398	SW156	SW156_KIDNEY	2.60644
ACH-001399	SW626	SW626_LARGE_INTESTINE	3.8953
ACH-001400	SW954	SW954_CERVIX	0.956057
ACH-001401	SW13	SW13_ADRENAL_CORTEX	3.51223
ACH-001402	SW756	SW756_CERVIX	4.15785
ACH-001403	TO14	TO14_OVARY	5.28688
ACH-001407	UMUC13	UMUC13_URINARY_TRACT	4.06091
ACH-001408	UMUC14	UMUC14_URINARY_TRACT	3.75275
ACH-001409	UMUC16	UMUC16_URINARY_TRACT	3.27202
ACH-001410	UMUC4	UMUC4_URINARY_TRACT	4.89045
ACH-001411	UMUC5	UMUC5_URINARY_TRACT	3.3505
ACH-001412	UMUC10	UMUC10_URINARY_TRACT	3.51475
ACH-001413	UMUC11	UMUC11_URINARY_TRACT	4.1914
ACH-001414	UMUC6	UMUC6_URINARY_TRACT	3.85898
ACH-001415	UMUC7	UMUC7_URINARY_TRACT	3.72247
ACH-001416	UMUC9	UMUC9_URINARY_TRACT	4.22805
ACH-001418	UWB1289	UWB1289_OVARY	2.81558
ACH-001419	VP229	VP229_BREAST	2.48027
ACH-001421	WERIRB1	WERIRB1_AUTONOMIC_GANGLIA	4.59036
ACH-001422	WPE1NA22	WPE1NA22_PROSTATE	3.12763
ACH-001430	TC138	TC138_BONE	4.17712
ACH-001431	TC205	TC205_BONE	3.02326
ACH-001433	CCLFPEDS0008T	CCLFPEDS0008T_SOFT_TISSUE	2.58976
ACH-001441	921	921_UVEA	2.65764
ACH-001442	A388	A388_SKIN	3.08406
ACH-001443	ASH3	ASH3_THYROID	3.18745
ACH-001450	BLUE1	BLUE1_HAEMATOPOIETIC_AND_LYMPHOID_TISSUE	4.60644
ACH-001451	BOKU	BOKU_CERVIX	2.32193
ACH-001453	BPH1	BPH1_PROSTATE	4.30597
ACH-001454	C10	C10_LARGE_INTESTINE	3.51349
ACH-001456	C125PM	C125PM_LARGE_INTESTINE	2.28392
ACH-001458	C75	C75_LARGE_INTESTINE	3.28688
ACH-001459	C80	C80_LARGE_INTESTINE	2.44361
ACH-001460	C84	C84_LARGE_INTESTINE	4.13996
ACH-001461	C99	C99_LARGE_INTESTINE	3.12928
ACH-001484	CI	CI_HAEMATOPOIETIC_AND_LYMPHOID_TISSUE	4.05832
ACH-001485	CII	CII_HAEMATOPOIETIC_AND_LYMPHOID_TISSUE	3.7366
ACH-001494	EGI1	EGI1_BILIARY_TRACT	1.87971
ACH-001495	EMTOKA	EMTOKA_ENDOMETRIUM	3.32481
ACH-001496	ESO26	ESO26_OESOPHAGUS	3.9855
ACH-001497	ESO51	ESO51_OESOPHAGUS	2.0635
ACH-001498	FARAGE	FARAGE_HAEMATOPOIETIC_AND_LYMPHOID_TISSUE	3.87086
ACH-001500	FLO1	FLO1_OESOPHAGUS	3.61235
ACH-001509	H357	H357_UPPER_AERODIGESTIVE_TRACT	2.49313
ACH-001510	H376	H376_UPPER_AERODIGESTIVE_TRACT	1.59455
ACH-001511	H413	H413_UPPER_AERODIGESTIVE_TRACT	2.40327
ACH-001513	HCA1	HCA1_CERVIX	2.31615
ACH-001515	HCS2	HCS2_CERVIX	2.98003
ACH-001516	HCSC1	HCSC1_CERVIX	3.65992
ACH-001517	HEC1	HEC1_ENDOMETRIUM	2.37851
ACH-001518	HEC116	HEC116_ENDOMETRIUM	2.43829
ACH-001519	HEMCSS	HEMCSS_BONE	3.27352
ACH-001520	HG3	HG3_HAEMATOPOIETIC_AND_LYMPHOID_TISSUE	2.33342
ACH-001521	HKA1	HKA1_SKIN	3.53854
ACH-001522	HMY1	HMY1_SKIN	3.43696
ACH-001523	HSC1	HSC1_SKIN	3.81147
ACH-001524	HSC5	HSC5_SKIN	3.43162
ACH-001525	HT3	HT3_CERVIX	2.9542
ACH-001526	HUO9	HUO9_BONE	1.91456
ACH-001528	IHH4	IHH4_THYROID	2.78031
ACH-001529	JAR	JAR_PLACENTA	2.74416
ACH-001530	JEG3	JEG3_PLACENTA	3.26303
ACH-001532	JMURTK2	JMURTK2_SOFT_TISSUE	3.51602
ACH-001533	KARPAS1718	KARPAS1718_HAEMATOPOIETIC_AND_LYMPHOID_TISSUE	2.37573
ACH-001536	KKU100	KKU100_BILIARY_TRACT	2.5509
ACH-001538	KKU213	KKU213_BILIARY_TRACT	3.22033
ACH-001539	KML1	KML1_HAEMATOPOIETIC_AND_LYMPHOID_TISSUE	2.75702
ACH-001540	KMLS1	KMLS1_SOFT_TISSUE	1.76977
ACH-001541	KMS28PE	KMS28PE_HAEMATOPOIETIC_AND_LYMPHOID_TISSUE	4.18428
ACH-001542	KON	KON_UPPER_AERODIGESTIVE_TRACT	2.64155
ACH-001543	KOSC2	KOSC2CL343_UPPER_AERODIGESTIVE_TRACT	2.53356
ACH-001548	LS	LS_AUTONOMIC_GANGLIA	3.68818
ACH-001549	LU135	LU135_LUNG	3.21412
ACH-001550	MCC13	MCC13_SKIN	3.43296
ACH-001551	MCC142	MCC142_SKIN	3.95513
ACH-001552	MCC26	MCC26_SKIN	4.00809
ACH-001554	MEL202	MEL202_UVEA	2.28096
ACH-001555	MERO14	MERO14_PLEURA	2.93734
ACH-001556	MERO25	MERO25_PLEURA	4.0635
ACH-001557	MERO41	MERO41_PLEURA	3.27798
ACH-001558	MERO48A	MERO48A_PLEURA	4.23189
ACH-001559	MERO82	MERO82_PLEURA	2.9855
ACH-001560	MERO83	MERO83_PLEURA	2.93923
ACH-001561	MERO84	MERO84_PLEURA	3.26754
ACH-001562	MERO95	MERO95_PLEURA	3.01792
ACH-001563	MM127	MM127_SKIN	2.53854
ACH-001566	MM370	MM370_SKIN	2.29572
ACH-001567	MM383	MM383_SKIN	2.29866
ACH-001568	MM386	MM386_SKIN	1.57531
ACH-001569	MM415	MM415_SKIN	2.26604
ACH-001570	MM426	MM426_SKIN	2.65535
ACH-001573	MOLM1	MOLM1_HAEMATOPOIETIC_AND_LYMPHOID_TISSUE	2.81147
ACH-001574	MOLM14	MOLM14_HAEMATOPOIETIC_AND_LYMPHOID_TISSUE	3.14405
ACH-001577	MUTZ8	MUTZ8_HAEMATOPOIETIC_AND_LYMPHOID_TISSUE	2.73769
ACH-001578	NCCIT	NCCIT_TESTIS	3.84599
ACH-001603	NH12	NH12_AUTONOMIC_GANGLIA	2.86987
ACH-001605	NO10	NO10_CENTRAL_NERVOUS_SYSTEM	2.58015
ACH-001607	NOZ	NOZ_LIVER	3.26754
ACH-001608	NP2	NP2_CENTRAL_NERVOUS_SYSTEM	2.84599
ACH-001609	NP3	NP3_CENTRAL_NERVOUS_SYSTEM	1.50589
ACH-001610	NP5	NP5_CENTRAL_NERVOUS_SYSTEM	3.62877
ACH-001611	NP8	NP8_CENTRAL_NERVOUS_SYSTEM	3.15866
ACH-001613	OCIAML4	OCIAML4_HAEMATOPOIETIC_AND_LYMPHOID_TISSUE	3.22342
ACH-001616	OCILY18	OCILY18_HAEMATOPOIETIC_AND_LYMPHOID_TISSUE	2.67582
ACH-001617	OCILY7	OCILY7_HAEMATOPOIETIC_AND_LYMPHOID_TISSUE	3.78973
ACH-001618	OCIM2	OCIM2_HAEMATOPOIETIC_AND_LYMPHOID_TISSUE	3.32481
ACH-001619	OCUG1	OCUG1_BILIARY_TRACT	1.97085
ACH-001622	ONDA7	ONDA7_CENTRAL_NERVOUS_SYSTEM	1.96347
ACH-001623	ONDA8	ONDA8_CENTRAL_NERVOUS_SYSTEM	3.25852
ACH-001624	ONDA9	ONDA9_CENTRAL_NERVOUS_SYSTEM	2.41684
ACH-001625	OSC19	OSC19_UPPER_AERODIGESTIVE_TRACT	3.30159
ACH-001626	OSC20	OSC20_UPPER_AERODIGESTIVE_TRACT	2.91456
ACH-001627	P4E6	P4E6_PROSTATE	2.9782
ACH-001628	PEA1	PEA1_OVARY	3.16993
ACH-001630	PEO1	PEO1_OVARY	2.09085
ACH-001632	PEO4	PEO4_OVARY	1.83996
ACH-001634	PGA1	PGA1_HAEMATOPOIETIC_AND_LYMPHOID_TISSUE	2.40054
ACH-001636	RAMOS	RAMOS_HAEMATOPOIETIC_AND_LYMPHOID_TISSUE	4.04876
ACH-001638	RCK8	RCK8_HAEMATOPOIETIC_AND_LYMPHOID_TISSUE	4.6311
ACH-001641	SAT	SAT_UPPER_AERODIGESTIVE_TRACT	3.6241
ACH-001642	SCC3	SCC3_HAEMATOPOIETIC_AND_LYMPHOID_TISSUE	2.52105
ACH-001645	SEKI	SEKI_SKIN	2.16672
ACH-001647	SHI1	SHI1_HAEMATOPOIETIC_AND_LYMPHOID_TISSUE	3.848
ACH-001648	SHMAC4	SHMAC4_PROSTATE	2.58976
ACH-001649	SHMAC5	SHMAC5_PROSTATE	2.29572
ACH-001650	SISO	SISO_CERVIX	2.59932
ACH-001651	SKGI	SKGI_ENDOMETRIUM	2.22342
ACH-001652	SKGII	SKGII_ENDOMETRIUM	1.83592
ACH-001653	SKGT2	SKGT2_STOMACH	2.37573
ACH-001654	SKGT4	SKGT4_OESOPHAGUS	3.0993
ACH-001655	SKN	SKN_ENDOMETRIUM	1.9782
ACH-001656	SKNO1	SKNO1_HAEMATOPOIETIC_AND_LYMPHOID_TISSUE	4.23573
ACH-001664	SNU638	SNU638_STOMACH	2.42761
ACH-001668	SUSA	SUSA_TESTIS	2.07039
ACH-001670	TASK1	TASK1_CENTRAL_NERVOUS_SYSTEM	2.96901
ACH-001673	TFK1	TFK1_BILIARY_TRACT	3.25248
ACH-001674	TGW	TGW_AUTONOMIC_GANGLIA	4.56133
ACH-001677	U2904	U2904_HAEMATOPOIETIC_AND_LYMPHOID_TISSUE	4.1914
ACH-001685	UHO1	UHO1_HAEMATOPOIETIC_AND_LYMPHOID_TISSUE	3.71589
ACH-001687	UMRC3	UMRC3_KIDNEY	1.24489
ACH-001688	UMRC7	UMRC7_KIDNEY	1.51602
ACH-001690	UPCISCC026	UPCISCC026_UPPER_AERODIGESTIVE_TRACT	2.46467
ACH-001692	UPCISCC040	UPCISCC040_UPPER_AERODIGESTIVE_TRACT	3.19692
ACH-001694	UPCISCC074	UPCISCC074_UPPER_AERODIGESTIVE_TRACT	3.47119
ACH-001698	UPCISCC116	UPCISCC116_UPPER_AERODIGESTIVE_TRACT	1.44361
ACH-001699	UPCISCC131	UPCISCC131_UPPER_AERODIGESTIVE_TRACT	2.66676
ACH-001702	VAESBJ	VAESBJ_SOFT_TISSUE	2.49313
ACH-001703	VAL	VAL_HAEMATOPOIETIC_AND_LYMPHOID_TISSUE	2.31034
ACH-001707	WAOSEL	WAOSEL_HAEMATOPOIETIC_AND_LYMPHOID_TISSUE	3.75382
ACH-001709	WSUNHL	WSUNHL_HAEMATOPOIETIC_AND_LYMPHOID_TISSUE	3.86691
ACH-001711	PFSK1	PFSK1_CENTRAL_NERVOUS_SYSTEM	3.13586
ACH-001712	HS860T	HS860T_BONE	1.85599
ACH-001715	CAL72	CAL72_BONE	3.51223
ACH-001716	GOTO	GOTO_AUTONOMIC_GANGLIA	5.02503
ACH-001719	OCIC4P	OCIC4P_OVARY	3.20163
ACH-001735	SEMK2	SEMK2_HAEMATOPOIETIC_AND_LYMPHOID_TISSUE	4.04789
ACH-001736	HB1119	HB1119_HAEMATOPOIETIC_AND_LYMPHOID_TISSUE	3.07553
ACH-001737	HSB2	HSB2_HAEMATOPOIETIC_AND_LYMPHOID_TISSUE	3.60288
ACH-001740	RH28	RH28_SOFT_TISSUE	3.69599
ACH-001743	RC2	RC2_SOFT_TISSUE	3.6311
ACH-001745	RHJT	RHJT_SOFT_TISSUE	4.15623
ACH-001750	TTC442	TTC442_SOFT_TISSUE	3.98732
ACH-001751	RH36	RH36_SOFT_TISSUE	4.33414
ACH-001765	RH4	RH4_SOFT_TISSUE	3.67469
ACH-001786	SNU1544	SNU1544_LARGE_INTESTINE	2.35614
ACH-001791	LPS6	LPS6_SOFT_TISSUE	1.78241
ACH-001793	LPS27	LPS27_SOFT_TISSUE	2.67582
ACH-001794	93T449	93T449_SOFT_TISSUE	2.75702
ACH-001795	94T778	94T778_SOFT_TISSUE	3.07211
ACH-001796	95T1000	95T1000_SOFT_TISSUE	2.0321
ACH-001799	LPS141	LPS141_SOFT_TISSUE	2.89142
ACH-001802	LPS853	LPS853_SOFT_TISSUE	3.15866
ACH-001804	LPS510	LPS510_SOFT_TISSUE	1.83592
ACH-001807	LPS067	LPS067_SOFT_TISSUE	2.42492
ACH-001814	OS252	OS252_BONE	2.86196
ACH-001818	C396	C396_BONE	1.83188
ACH-001819	MFM223	MFM223_BREAST	3.73335
ACH-001820	COLO824	COLO824_BREAST	2.82985
ACH-001834	ICC10	ICC10_BILIARY_TRACT	3.5472
ACH-001835	ICC106	ICC106_BILIARY_TRACT	2.81762
ACH-001836	ICC108	ICC108_BILIARY_TRACT	3.28983
ACH-001838	ICC12	ICC12_BILIARY_TRACT	2.7866
ACH-001839	ICC137	ICC137_BILIARY_TRACT	2.17951
ACH-001841	ICC15	ICC15_BILIARY_TRACT	3.51728
ACH-001842	ICC2	ICC2_BILIARY_TRACT	2.40054
ACH-001843	ICC3	ICC3_BILIARY_TRACT	2.8679
ACH-001844	ICC4	ICC4_BILIARY_TRACT	3.12267
ACH-001845	ICC5	ICC5_BILIARY_TRACT	2.88947
ACH-001846	ICC6	ICC6_BILIARY_TRACT	2.66221
ACH-001848	ICC8	ICC8_BILIARY_TRACT	2.41143
ACH-001849	ICC9	ICC9_BILIARY_TRACT	2.30451
ACH-001850	G415	G415_BILIARY_TRACT	2.87578
ACH-001852	HKGZCC	HKGZCC_BILIARY_TRACT	3.50208
ACH-001853	KMCH1	KMCH1_BILIARY_TRACT	3.40054
ACH-001856	RBE	RBE_BILIARY_TRACT	2.18269
ACH-001857	SG231	SG231_BILIARY_TRACT	2.70708
ACH-001858	SSP25	SSP25_BILIARY_TRACT	2.57046
ACH-001861	TGBC1TKB	TGBC1TKB_BILIARY_TRACT	2.88947
ACH-001862	TGBC52TKB	TGBC52TKB_BILIARY_TRACT	2.40599
ACH-001863	TKKK	TKKK_BILIARY_TRACT	2.85
ACH-001864	YSCCC	YSCCC_BILIARY_TRACT	2.17632
ACH-001959	CCLP1	CCLP1_BILIARY_TRACT	3.29278
ACH-001960	CCSW1	CCSW1_BILIARY_TRACT	3.10936
ACH-001961	GB2	GB2_BILIARY_TRACT	2.88557
ACH-001970	MM253	MM253_SKIN	4.07895
ACH-001973	MM485	MM485_SKIN	2.61589
ACH-001991	NZOV9	NZOV9_OVARY	3.99548
ACH-001992	ONE58	ONE58_LUNG	2.81352
ACH-001993	NALM16	NALM16_HAEMATOPOIETIC_AND_LYMPHOID_TISSUE	4.02326
ACH-001997	ECC2	ECC2_BILIARY_TRACT	3.4489
ACH-001999	9505BIK	9505BIK_PANCREAS	2.68257
ACH-002001	A375SKINCJ1	A375_SKIN_CJ1_RESISTANT	2.45943
ACH-002002	A375SKINCJ2	A375_SKIN_CJ2_RESISTANT	2.37016
ACH-002003	A375SKINCJ3	A375_SKIN_CJ3_RESISTANT	2.74631
ACH-002004	UACC62SKINCJ1	UACC62_SKIN_CJ1_RESISTANT	2.36177
ACH-002005	SKMEL19	SKMEL19_SKIN	3.45022
ACH-002011	MP46	MP46_UVEA	3.13914
ACH-002015	MEL285	MEL285_UVEA	2.87578
ACH-002016	MEL290	MEL290_UVEA	2.63227
ACH-002017	OMM1	OMM1_UVEA	2.98185
ACH-002018	OMM25	OMM25_UVEA	2.29866
ACH-002019	HOKUG	HOKUG_CERVIX	3.75489
ACH-002021	T3M3	T3M3_PLACENTA	2.38957
ACH-002023	TGBC18TKB	TGBC18TKB_LARGE_INTESTINE	2.75061
ACH-002024	ECC4	ECC4_LARGE_INTESTINE	4.0072
ACH-002025	TT1TKB	TT1TKB_LARGE_INTESTINE	3.50208
ACH-002026	HHUA	HHUA_ENDOMETRIUM	2.93734
ACH-002027	HOUAI	HOUAI_ENDOMETRIUM	1.97453
ACH-002029	SAS	SAS_UPPER_AERODIGESTIVE_TRACT	3.46074
ACH-002038	HSKTC	HSKTC_OVARY	4.08151
ACH-002039	PK8	PK8_PANCREAS	4.57531
ACH-002041	HOTHC	HOTHC_THYROID	2.77821
ACH-002042	T3M5	T3M5_THYROID	3.26003
ACH-002044	HSQ89	HSQ89_UPPER_AERODIGESTIVE_TRACT	4.40667
ACH-002045	HO1U1	HO1U1_UPPER_AERODIGESTIVE_TRACT	4.03474
ACH-002046	HTMMT	HTMMT_ENDOMETRIUM	3.46336
ACH-002059	P30OHK	P30OHK_HAEMATOPOIETIC_AND_LYMPHOID_TISSUE	3.53854
ACH-002062	SLVL	SLVL_HAEMATOPOIETIC_AND_LYMPHOID_TISSUE	4.37921
ACH-002065	HSPSS	HSPSS_CENTRAL_NERVOUS_SYSTEM	3.37573
ACH-002066	HSSCH2	HSSCH2_CENTRAL_NERVOUS_SYSTEM	3.47379
ACH-002067	NOS1	NOS1_BONE	2.7866
ACH-002069	HSOS1	HSOS1_BONE	3.19377
ACH-002084	MMAC	MMAC_SKIN	3.01792
ACH-002446	CCLFUPGI0005T	CCLFUPGI0005T_STOMACH	1.9855
ACH-002458	HT144SKINFV1	HT144_SKIN_FV1_RESISTANT	2.28983
ACH-002459	HT144SKINFV3	HT144_SKIN_FV3_RESISTANT	2.62059
ACH-002460	HT144SKINFV2	HT144_SKIN_FV2_RESISTANT	2.67356
ACH-002461	RVH421SKINFV1	RVH421_SKIN_FV1_RESISTANT	2.59455
ACH-002462	RPE1SS48	RPE1SS48_ENGINEERED	2.6893
ACH-002463	RPE1SS77	RPE1SS77_ENGINEERED	2.10098
ACH-002464	RPE1SS6	RPE1SS6_ENGINEERED	2.65764
ACH-002465	RPE1SS119	RPE1SS119_ENGINEERED	2.46205
ACH-002466	RPE1SS111	RPE1SS111_ENGINEERED	2.22959
ACH-002467	RPE1SS51	RPE1SS51_ENGINEERED	2.02148
ACH-002475	HAP1	HAP1_ENGINEERED	3.62176
ACH-002508	WM3211	WM3211_SKIN	2.80735
ACH-002509	WM4235	WM4235_SKIN	3.98641
ACH-002510	M040416	M040416_SKIN	2.47249
ACH-002511	M140325	M140325_SKIN	3.86295
ACH-002512	MM160113	MM160113_SKIN	2.72901

## Sheet: CENTRAL_NERVOUS_SYSTEM
		PLAGL2 expression		cell line	description
		3.07553	ACH-000025	CH157MN	CH157MN_CENTRAL_NERVOUS_SYSTEM
		2.79909	ACH-000027	GOS3	GOS3_CENTRAL_NERVOUS_SYSTEM
		2.66448	ACH-000036	U343	U343_CENTRAL_NERVOUS_SYSTEM
		3.72247	ACH-000040	U118MG	U118MG_CENTRAL_NERVOUS_SYSTEM
		4.32912	ACH-000055	D283MED	D283MED_CENTRAL_NERVOUS_SYSTEM
		3.32912	ACH-000067	HS683	HS683_CENTRAL_NERVOUS_SYSTEM
		3.41007	ACH-000075	U87MG	U87MG_CENTRAL_NERVOUS_SYSTEM
		3.3978	ACH-000095	D341	D341MED_CENTRAL_NERVOUS_SYSTEM
		4.23573	ACH-000098	GAMG	GAMG_CENTRAL_NERVOUS_SYSTEM
		3.99005	ACH-000102	GMS10	GMS10_CENTRAL_NERVOUS_SYSTEM
		3.16189	ACH-000126	KG1C	KG1C_CENTRAL_NERVOUS_SYSTEM
		3.11103	ACH-000128	LN319	LN319_CENTRAL_NERVOUS_SYSTEM
		3.17153	ACH-000137	8MGBA	8MGBA_CENTRAL_NERVOUS_SYSTEM
		3.38543	ACH-000152	M059K	M059K_CENTRAL_NERVOUS_SYSTEM
		3.67016	ACH-000200	NMCG1	NMCG1_CENTRAL_NERVOUS_SYSTEM
		2.5509	ACH-000208	U178	U178_CENTRAL_NERVOUS_SYSTEM
		3.52857	ACH-000211	DAOY	DAOY_CENTRAL_NERVOUS_SYSTEM
		3.26604	ACH-000215	LN382	LN382_CENTRAL_NERVOUS_SYSTEM
		2.91839	ACH-000231	KALS1	KALS1_CENTRAL_NERVOUS_SYSTEM
		2.7845	ACH-000232	U251MG	U251MG_CENTRAL_NERVOUS_SYSTEM
		2.77189	ACH-000244	DKMG	DKMG_CENTRAL_NERVOUS_SYSTEM
		3.0036	ACH-000269	AM38	AM38_CENTRAL_NERVOUS_SYSTEM
		2.63691	ACH-000273	SF539	SF539_CENTRAL_NERVOUS_SYSTEM
		3.77926	ACH-000283	A1207	A1207_CENTRAL_NERVOUS_SYSTEM
		2.41143	ACH-000289	SNU466	SNU466_CENTRAL_NERVOUS_SYSTEM
		3.27202	ACH-000323	42MGBA	42MGBA_CENTRAL_NERVOUS_SYSTEM
		3.47508	ACH-000328	LN215	LN215_CENTRAL_NERVOUS_SYSTEM
		2.96717	ACH-000329	CCFSTTG1	CCFSTTG1_CENTRAL_NERVOUS_SYSTEM
		2.74201	ACH-000368	SNU1105	SNU1105_CENTRAL_NERVOUS_SYSTEM
		2.93546	ACH-000370	SNU626	SNU626_CENTRAL_NERVOUS_SYSTEM
		2.57046	ACH-000376	SF295	SF295_CENTRAL_NERVOUS_SYSTEM
		2.97636	ACH-000389	H4	H4_CENTRAL_NERVOUS_SYSTEM
		3.54102	ACH-000437	SW1088	SW1088_CENTRAL_NERVOUS_SYSTEM
		2.96162	ACH-000445	KNS60	KNS60_CENTRAL_NERVOUS_SYSTEM
		2.74201	ACH-000455	LN428	LN428_CENTRAL_NERVOUS_SYSTEM
		3.19849	ACH-000464	CAS1	CAS1_CENTRAL_NERVOUS_SYSTEM
		2.62059	ACH-000469	YH13	YH13_CENTRAL_NERVOUS_SYSTEM
		3.15866	ACH-000479	KNS81	KNS81_CENTRAL_NERVOUS_SYSTEM
		2.74846	ACH-000490	SF767	SF767_CENTRAL_NERVOUS_SYSTEM
		2.76553	ACH-000504	SNB75	SNB75_CENTRAL_NERVOUS_SYSTEM
		3.0268	ACH-000543	SNU489	SNU489_CENTRAL_NERVOUS_SYSTEM
		3.33485	ACH-000558	A172	A172_CENTRAL_NERVOUS_SYSTEM
		2.9982	ACH-000570	YKG1	YKG1_CENTRAL_NERVOUS_SYSTEM
		3.22959	ACH-000571	T98G	T98G_CENTRAL_NERVOUS_SYSTEM
		2.76977	ACH-000591	LN235	LN235_CENTRAL_NERVOUS_SYSTEM
		3.1635	ACH-000592	TM31	TM31_CENTRAL_NERVOUS_SYSTEM
		3.5741	ACH-000595	LN229	LN229_CENTRAL_NERVOUS_SYSTEM
		3.0072	ACH-000609	SF126	SF126_CENTRAL_NERVOUS_SYSTEM
		3.75489	ACH-000622	KNS42	KNS42_CENTRAL_NERVOUS_SYSTEM
		2.50335	ACH-000623	SNU201	SNU201_CENTRAL_NERVOUS_SYSTEM
		3.18903	ACH-000629	IOMMLEE	IOMMLEE_CENTRAL_NERVOUS_SYSTEM
		3.42358	ACH-000631	KS1	KS1_CENTRAL_NERVOUS_SYSTEM
		3.52105	ACH-000634	LN340	LN340_CENTRAL_NERVOUS_SYSTEM
		3.65535	ACH-000655	SF268	SF268_CENTRAL_NERVOUS_SYSTEM
		3.37295	ACH-000673	LN443	LN443_CENTRAL_NERVOUS_SYSTEM
		3.1811	ACH-000676	LN464	LN464_CENTRAL_NERVOUS_SYSTEM
		3.70819	ACH-000738	GB1	GB1_CENTRAL_NERVOUS_SYSTEM
		3.65306	ACH-000756	GI1	GI1_CENTRAL_NERVOUS_SYSTEM
		2.81762	ACH-000760	LNZ308	LNZ308_CENTRAL_NERVOUS_SYSTEM
		3.69711	ACH-000776	ONS76	ONS76_CENTRAL_NERVOUS_SYSTEM
		4.54659	ACH-000807	SNU738	SNU738_CENTRAL_NERVOUS_SYSTEM
		3.86493	ACH-000819	LN18	LN18_CENTRAL_NERVOUS_SYSTEM
		3.21101	ACH-000863	DBTRG05MG	DBTRG05MG_CENTRAL_NERVOUS_SYSTEM
		2.54597	ACH-000883	SW1783	SW1783_CENTRAL_NERVOUS_SYSTEM
		3.12928	ACH-000887	SF172	SF172_CENTRAL_NERVOUS_SYSTEM
		3.62176	ACH-001016	BECKER	BECKER_CENTRAL_NERVOUS_SYSTEM
		3.10936	ACH-001053	D425	D425_CENTRAL_NERVOUS_SYSTEM
		3.55213	ACH-001054	D458	D458_CENTRAL_NERVOUS_SYSTEM
		3.30889	ACH-001067	F5	F5_CENTRAL_NERVOUS_SYSTEM
		3.61353	ACH-001201	SUMB002	SUMB002_CENTRAL_NERVOUS_SYSTEM
		2.92029	ACH-001232	UW228	UW228_CENTRAL_NERVOUS_SYSTEM
		3.1375	ACH-001329	ANGMCSS	ANGMCSS_CENTRAL_NERVOUS_SYSTEM
		2.58015	ACH-001605	NO10	NO10_CENTRAL_NERVOUS_SYSTEM
		2.84599	ACH-001608	NP2	NP2_CENTRAL_NERVOUS_SYSTEM
		1.50589	ACH-001609	NP3	NP3_CENTRAL_NERVOUS_SYSTEM
		3.62877	ACH-001610	NP5	NP5_CENTRAL_NERVOUS_SYSTEM
		3.15866	ACH-001611	NP8	NP8_CENTRAL_NERVOUS_SYSTEM
		1.96347	ACH-001622	ONDA7	ONDA7_CENTRAL_NERVOUS_SYSTEM
		3.25852	ACH-001623	ONDA8	ONDA8_CENTRAL_NERVOUS_SYSTEM
		2.41684	ACH-001624	ONDA9	ONDA9_CENTRAL_NERVOUS_SYSTEM
		2.96901	ACH-001670	TASK1	TASK1_CENTRAL_NERVOUS_SYSTEM
		3.13586	ACH-001711	PFSK1	PFSK1_CENTRAL_NERVOUS_SYSTEM
		3.37573	ACH-002065	HSPSS	HSPSS_CENTRAL_NERVOUS_SYSTEM
		3.47379	ACH-002066	HSSCH2	HSSCH2_CENTRAL_NERVOUS_SYSTEM

## Sheet: CCLE_expression
	TSPAN6 (7105)	TNMD (64102)	DPM1 (8813)	SCYL3 (57147)	C1orf112 (55732)	FGR (2268)	CFH (3075)	FUCA2 (2519)	GCLC (2729)	NFYA (4800)	STPG1 (90529)	NIPAL3 (57185)	LAS1L (81887)	ENPP4 (22875)	SEMA3F (6405)	CFTR (1080)	ANKIB1 (54467)	CYP51A1 (1595)	KRIT1 (889)	RAD52 (5893)	BAD (572)	LAP3 (51056)	CD99 (4267)	HS3ST1 (9957)	AOC1 (26)	WNT16 (51384)	HECW1 (23072)	MAD1L1 (8379)	LASP1 (3927)	SNX11 (29916)	TMEM176A (55365)	M6PR (4074)	KLHL13 (90293)	CYP26B1 (56603)	ICA1 (3382)	DBNDD1 (79007)	ALS2 (57679)	CASP10 (843)	CFLAR (8837)	TFPI (7035)	NDUFAF7 (55471)	RBM5 (10181)	MTMR7 (9108)	SLC7A2 (6542)	ARF5 (381)	SARM1 (23098)	POLDIP2 (26073)	PLXND1 (23129)	AK2 (204)
ACH-001113	4.9905	0	7.2737	2.76553	4.48027	0.0285692	1.26903	3.05832	6.48317	5.05398	3.45681	4.41549	4.7666	2.28096	3.23726	0	5.12598	6.63677	5.63836	3.88166	5.15664	4.77505	5.90497	0.0976108	0.111031	0.0426443	2.848	3.33628	5.37121	4.31397	0	7.53683	5.20789	2.96532	1.9222	2.04963	4.47897	2.07724	5.10182	0.0565835	4.61471	5.28614	0.545968	1.61353	7.3812	2.61117	5.92908	5.29389	6.73064
ACH-001289	5.20984	0.545968	7.0706	2.53854	3.51096	0	0.176323	3.83693	4.20085	3.83289	1.91073	3.37434	4.86196	3.62527	1.27501	0.0285692	5.17712	7.13031	5.06178	3.02326	5.54226	6.30542	6.64155	0.0840643	0.0143553	0.275007	0.189034	2.90304	4.95513	4.42156	0.0426443	7.13309	2.86196	0.124328	3.51349	4.05658	4.28614	0.333424	4.52042	0.0703893	3.98732	6.19239	3.1635	2.18587	7.79253	2.42761	6.26941	3.78555	7.32706
ACH-001339	3.77926	0	7.34643	2.33914	4.25475	0.0565835	1.33914	6.72424	3.67129	3.77505	2.8953	3.61353	4.30086	0.799087	0.275007	0.0426443	4.14975	5.65535	4.85898	2.67582	4.56071	6.17013	8.18225	0.389567	0.0840643	0.0840643	0.0840643	5.73363	6.27426	4.40735	0.214125	7.36142	0.137504	0.454176	2.30159	3.31759	3.74631	1.23266	4.75061	3.91456	3.72356	5.00854	0.545968	1.40054	6.86456	2.24184	6.12309	7.24279	8.11987
ACH-001538	5.72683	0	7.08619	2.5435	3.10266	0	5.91456	6.09972	4.47573	4.29425	2.47249	4.5735	5.3147	3.488	2.98003	0.0285692	3.87283	6.17692	3.7148	2.72683	5.56529	5.23036	6.81173	2.65764	0.0840643	0.124328	0.367371	4.16189	6.70321	3.54102	0.0703893	7.20848	0.0143553	1.12433	3.94673	3.23726	2.93168	2.79701	4.59156	3.12267	3.55459	5.38336	0.111031	1.08406	7.40378	1.97453	5.44427	0.970854	7.95449
ACH-000242	7.46565	0	6.43546	2.41414	3.86493	0.831877	7.198	5.45253	7.11249	4.71094	1.91456	2.74631	5.01078	0.871844	5.81532	0.0703893	4.26903	6.75916	4.87873	3.15704	6.10392	5.68313	7.32103	3.24793	0.0143553	0.0143553	0	4.20555	7.02934	4.0063	0	7.27575	2.02503	0.669027	5.59186	2.52857	3.61353	1.99277	4.44029	0.807355	3.43029	6.78856	1.20789	4.16189	7.64386	3.16832	6.09656	2.51349	7.7926
ACH-000708	4.91409	0.176323	6.94685	2.57773	3.854	0	0.0840643	4.85549	4.93404	3.68145	2.51349	3.93168	5.07682	2.67582	2.03914	6.62746	3.74846	6.26134	4.68313	2.90497	4.86146	5.32229	7.35826	0.536053	5.5097	0.0565835	0	4.48864	7.04712	3.60999	6.83378	6.87246	0.124328	0	6.44328	5.29168	3.07211	2.48285	5.30268	0.176323	4.09508	5.804	0.275007	0.163499	8.10549	3.45154	6.80245	2.01792	7.71884
ACH-000327	4.03298	0	5.80658	1.9486	2.68482	0.0143553	3.1177	5.97751	3.65306	3.01436	1.52607	3.92979	4.03826	3.28096	0.400538	0.815575	3.35755	6.28059	4.21723	2.79286	4.59335	5.77952	5.10769	0.575312	0.0840643	0.0565835	0.263034	2.77189	5.25965	3.22188	0.0976108	5.8716	1.07039	1.48543	6.04221	4.05485	2.854	1.23879	4.28762	3.88166	4.22882	4.88606	0.505891	3.58376	6.6512	2.84599	6.08704	0.948601	7.21335
ACH-000233	0.0976108	0	5.9191	3.98368	3.73335	0.0285692	6.11124	2.96347	3.41549	4.82069	3.6837	3.97545	5.1819	3.19535	0.454176	0	4.61471	5.30232	4.95327	4.10685	5.25475	5.82349	8.65413	0.0143553	0	0.815575	0.0565835	4.60051	5.91552	4.32048	0.124328	6.47168	0.137504	5.52826	4.68594	2.5509	3.33342	1.5008	5.75756	2.66903	4.39985	6.80245	5.38336	2.04963	7.69891	2.18903	5.47671	0.344828	7.35067
ACH-000461	4.7126	0	6.40633	2.24793	3.0321	0.0285692	0.0976108	5.52857	6.3837	3.97361	2.52105	3.15704	5.79883	2.38957	2.88753	0	3.97453	4.98459	4.15785	3.01257	5.3906	5.80452	6.1336	0.748461	2.58736	0.0703893	0.201634	4.54905	7.49289	4.48478	2.12433	6.47881	0.0426443	3.32912	4.03298	4.87873	4.28762	1.54597	5.45352	4.35614	3.01078	6.03958	0.163499	2.21723	7.39489	1.70487	7.11728	4.99277	8.9249
ACH-000705	5.1014	0	6.30998	2.36177	4.28021	0.0285692	0.201634	2.5435	6.1266	4.72683	2.71589	3.83592	5.11145	2.82579	3.31904	0.0143553	4.24641	5.25626	4.75542	3.64962	5.62702	4.61648	6.68032	0.575312	0.0285692	0.475085	0	3.34341	5.8627	4.20477	0.176323	6.75569	2.94298	0.933573	4.39985	3.74524	4.02768	0.505891	4.10852	0.15056	4.75702	5.25361	1.17632	0.782409	7.22429	1.13093	6.87836	5.42593	7.03771
ACH-001794	4.46336	0.0426443	6.71466	1.848	3.17153	0.62293	6.97591	6.99379	4.23496	3.76765	3.94017	6.39369	4.78555	1.67356	1.75275	0.0143553	3.73118	4.29793	3.7301	2.59216	6.7086	7.18775	9.59074	0.0143553	0.0565835	0	3.5435	3.27501	7.91522	4.5008	0.0426443	6.39763	0	0.214125	0.0426443	2.04963	4.37226	1.93357	5.19101	7.29536	3.35896	4.49378	1.15056	1.0635	7.0343	0.650765	5.98641	6.32085	7.06447
ACH-002023	6.04592	0	6.7241	2.26003	3.83592	0	4.1152	6.26303	4.39849	3.72792	2.80735	3.78136	4.84248	3.69488	2.36737	0.124328	4.9241	7.4149	5.07468	2.56071	4.851	5.77321	6.88448	3.89433	3.96809	0.0285692	0.0565835	3.48027	8.56148	4.42425	3.47508	7.0993	0.263034	0.432959	4.39094	3.92505	3.75168	2.55582	5.37782	6.77545	3.37156	4.57894	0.286881	1.10434	7.30697	2.60407	6.69905	4.78084	6.9644
ACH-000528	5.23649	0	7.00585	2.82985	4.66676	0.0143553	0.823749	6.60748	3.97545	4.36247	1.86394	4.2891	4.97039	4.23802	3.64155	0.0426443	4.0917	6.33949	4.40939	2.854	6.45385	5.77083	7.55543	0.941106	0.124328	0.0703893	0	4.20633	8.40799	3.80323	0	6.32625	3.30159	3.71589	5.17193	4.89191	3.79494	0.536053	4.84197	0.321928	4.37295	5.97934	1.29278	3.81865	7.65578	0.0565835	5.09001	5.47897	7.46712
ACH-001655	4.37643	0	6.67948	0.925999	1.8679	0.0426443	0.0565835	5.39403	1.83996	2.63459	1.89918	2.33914	5.14527	0.226509	2.47508	0.0285692	3.55827	4.51475	3.38405	2.32481	4.904	3.34056	7.01223	0	0	0.0285692	1.852	5.86443	6.51223	3.09592	0	5.3466	0.0840643	0.443607	0	2.90111	2.63691	1.18903	2.58736	5.91719	3.02148	4.73715	0.505891	1.05658	7.54589	3.31904	5.6879	4.78031	7.48961
ACH-000167	0.0703893	0	6.64918	2.29866	3.97177	5.85275	0.275007	3.61235	4.14568	3.95513	0.0143553	1.91839	5.77979	2.70044	0.0565835	0.298658	3.98003	5.30779	4.41954	3.94205	5.36107	6.7256	6.87357	0.0143553	0.378512	0.226509	0.454176	3.49057	5.3799	5.78581	0.0703893	7.28429	4.48929	0	5.27352	0.214125	2.51602	2.56071	5.87627	1.0635	4.27352	6.6476	0.505891	0.0285692	6.83996	0.275007	6.25512	0.475085	8.26782
ACH-000792	3.79805	0	6.19771	1.73985	3.45943	0.0840643	0.411426	6.56285	4.40735	7.49833	2.48543	3.01614	5.55766	0.0426443	5.17991	0.275007	4.70819	6.57531	5.18943	3.42761	5.12639	5.16792	7.64717	0.0143553	0.163499	0.0285692	3.1635	6.03122	6.81481	3.89142	0.0703893	6.77307	0.411426	4.25248	0.238787	1.76553	3.96347	0.594549	6.92896	4.57046	3.33628	6.70529	0.464668	1.5008	7.26894	0.526069	6.08789	6.78895	7.1915
ACH-001098	6.70681	0	6.72656	3.25852	3.12763	0	4.94907	5.80271	6.97648	4.25626	2.4489	3.81967	4.30232	1.5008	1.89918	0	4.75328	6.33593	4.85748	2.93357	4.56255	6.40701	5.33949	1.87184	0	0.485427	0	3.14078	6.92636	3.8846	0	7.58796	1.8679	2.57046	5.59066	1.9222	3.75596	1.32193	4.90881	7.30761	3.70377	6.7494	0.632268	0	7.51483	2.55582	5.06824	4.54473	6.99944
ACH-000570	5.91409	0	6.74967	2.80941	4.17552	0.176323	5.85922	6.53528	4.59813	5.06307	2.45681	4.06781	5.54442	0.613532	5.3906	0.0426443	5.15097	5.34127	5.52325	3.55827	6.26247	5.53076	8.15421	2.04963	0	0.0285692	2.65992	4.56377	6.65764	4.37504	0.0426443	7.16269	1.37295	0.275007	0.137504	5.38647	4.17632	0.226509	4.58075	6.63851	3.74631	6.94228	0.903038	2.34483	8.21989	3.92029	6.52058	6.30049	7.57425
ACH-000351	4.61412	0	8.07044	2.35614	4.10518	1.64155	0.344828	6.0045	4.62469	4.12681	2.16993	3.853	5.47606	3.76341	2.59694	0.0703893	5.2149	4.71094	4.91313	2.69822	6.29205	6.02503	7.66541	0.0565835	3.38681	1.0072	0.910733	5.19967	7.24117	4.37573	3.41414	6.57031	1.07724	2.07039	3.35332	2.9782	3.95977	2.9279	4.98185	4.5601	4.10014	5.93993	0.565597	1.83996	8.1079	5.1811	7.77722	5.70016	7.55919
ACH-000769	5.4192	0	6.10915	2.44626	4.1914	0	0.0976108	5.73227	5.75087	4.01525	1.81558	3.75168	5.08321	2.47768	1.5008	0.443607	4.45878	7.40616	4.90207	3.63459	5.8392	6.11666	4.42021	1.46989	0.918386	0.485427	0.505891	4.04439	6.53636	4.30232	2.37295	6.61117	2.44626	0.422233	5.20984	4.66505	3.43829	0.111031	4.36807	0.411426	4.2502	5.81096	0.286881	2.97085	7.86821	2.1635	6.28374	4.18587	7.90773
ACH-000154	3.99095	0	6.17632	2.36457	3.32337	0.0285692	5.81198	6.76898	4.62877	4.0781	3.67694	5.90304	4.86146	0.565597	5.73308	0.887525	4.57168	5.15502	4.67751	3.2555	6.23707	5.07039	9.74581	0	0.0426443	2.41143	2.44361	4.29866	7.48253	3.82069	0.214125	6.66661	4.04089	0.0840643	0.669027	3.70155	4.22497	1.23879	5.05224	5.75034	3.48671	6.70044	0.584963	0.910733	7.23707	2.43296	6.44973	5.70929	7.02658
ACH-000828	4.13093	0	5.81788	3.89142	3.65191	0	0.0426443	4.64847	5.47379	4.0505	1.87971	4.77558	4.62936	2.87971	5.60259	0.137504	4.12433	5.12928	4.33128	3.0635	6.08321	5.65507	6.93369	0.298658	0.0426443	0	0.111031	3.14893	9.37252	7.15583	0.0703893	6.03166	0.847997	0.0703893	6.39575	4.19692	3.34767	0.0426443	4.34554	0.333424	2.79494	6.72996	0.263034	0.0840643	7.17303	3.56194	9.2807	5.20398	7.81192
ACH-000421	5.25701	0.333424	6.92422	2.96532	4.76182	0.189034	0.250962	6.90905	5.87504	4.07039	2.67807	3.91743	5.34944	3.47768	3.53854	0.263034	5.04002	6.2867	5.54874	4.34483	5.20906	6.77056	6.27519	1.43829	4.03122	0.847997	0.773996	4.36667	7.41143	4.23189	3.0268	6.80916	1.5656	0.790772	4.853	5.41886	4.52042	3.26754	5.77452	0.85599	4.05572	5.51822	0.678072	2.4489	7.44642	1.25096	6.21218	5.04614	8.10423
ACH-000765	3.60644	0	7.38664	2.51096	3.89142	0.0143553	0.137504	5.8339	4.25323	4.72465	3.33485	4.01614	5.11312	1.59932	1.21412	0.0976108	4.79338	4.74578	4.92172	3.61471	6.16852	6.06199	7.50676	0.773996	0.238787	0.321928	0	6.23381	6.43146	4.41346	0.124328	7.13247	0.604071	0.526069	2.13422	3.11936	4.45878	0.238787	4.9222	4.38474	4.53978	6.41126	1.20789	1.32193	6.35067	3.26303	5.90304	6.65005	8.4735
ACH-001375	4.58436	0	7.17413	2.23879	4.86047	0.0565835	1.92979	6.22207	6.12247	4.21645	3.12267	4.42089	4.28614	3.92979	2.78241	0	5.65134	6.32894	5.79155	3.22805	6.19121	5.60999	5.75275	2.09761	1.0072	0.286881	1.69599	3.48156	8.1333	4.20163	0	6.63169	0.594549	1.67807	4.31832	3.88655	3.72247	2.86592	5.04352	6.32355	4.46074	5.00045	0.505891	5.27836	6.85599	1.87971	6.33432	2.86987	7.49033
ACH-000008	3.46728	0	7.09223	2.20477	4.12598	0	0.0976108	6.42274	4.73823	4.25323	2.72465	5.23611	5.5245	1.04963	0.275007	0.298658	4.70543	5.25248	5.41278	3.40599	5.32948	6.40344	7.37374	0.0976108	0.163499	0.163499	3.16993	6.52904	6.29646	4.38957	0.15056	7.72274	2.15704	0.432959	1.20163	4.56986	4.47897	1.52607	4.68201	1.5509	4.33271	6.03166	0.545968	2.43029	7.32544	2.9982	6.82426	5.24831	8.13016
ACH-001814	5.21607	0	7.55766	1.54597	3.01257	0.0285692	4.92029	6.74779	4.04177	4.0993	2.63459	3.59335	4.78921	0.189034	1.07724	0.15056	4.76235	6.21315	5.04745	1.90689	6.21218	5.49985	10.3326	0.137504	0.0565835	1.29866	1.75702	4.774	6.79922	4.27724	0.344828	6.90749	0.956057	0.903038	0.15056	0.485427	3.43029	0.722466	3.91839	5.68061	3.14568	5.12184	0.739848	0.575312	9.13437	2.83996	5.80426	5.0505	7.66576
ACH-000800	3.62761	0	6.53512	2.52857	4.33985	0.0143553	0.400538	5.05961	4.70099	5.58225	0.0426443	2.98732	5.41075	1.58015	3.51979	0.0143553	4.30451	6.70307	4.55643	4.78816	6.10014	5.22381	2.59216	0.485427	0	0.659925	0.0840643	4.28021	5.22188	3.5472	0	6.69794	4.87922	2.48543	2.68706	4.45088	4.66789	0.495695	3.86196	0.389567	4.09845	5.71754	1.91073	0.443607	6.79818	4.48156	5.52419	5.38059	7.89008
ACH-000606	4.06523	0	6.11624	1.61824	3.69153	0.0565835	2.33628	5.67186	5.00764	3.29131	3.27053	4.95791	5.01123	0.0285692	4.06695	0	3.55459	4.70377	3.90977	2.39506	6.25134	5.19219	6.63329	1.83996	0.15056	1.37295	1.67807	4.48091	6.69919	3.79597	0.0703893	6.16209	3.18903	3.07211	0.176323	1.91839	3.24945	2.69599	4.90881	2.14078	3.33628	4.41954	0.0976108	0.0426443	6.50128	1.14405	5.8953	2.47768	7.80555
ACH-000317	4.01257	0	6.08364	2.07039	2.61353	0.0703893	4.13504	5.05398	2.72465	2.98914	1.45418	3.6792	4.92932	2.83996	4.78764	0.613532	5.34554	5.88899	5.32048	3.63343	6.36492	6.04461	7.00101	0.782409	0.263034	0.0703893	2.65992	4.1811	7.1265	3.89433	0	6.66732	1.64155	1.89918	4.46205	4.51916	4.65764	2.29866	6.61839	1.57046	3.65878	5.75542	0.516015	0.201634	7.56224	1.42761	6.45401	2.52356	7.45951
ACH-000123	3.52982	0.250962	6.44956	1.74846	3.16511	0	5.24565	0.443607	3.05311	3.76871	1.97453	3.15866	5.43763	2.54102	3.17792	0.823749	4.1127	5.38163	4.33557	3.9782	4.93452	6.3087	7.53481	0.0426443	0.0703893	0.0840643	0.0426443	3.87086	7.05192	4.0635	0.0703893	6.0433	0.823749	0.443607	0.400538	4.7761	3.76022	0.111031	4.904	1.9855	4.0072	6.09107	0.678072	0.0143553	7.59902	3.71589	6.12887	1.88753	7.33405
ACH-000723	3.90207	0	6.59201	1.97085	3.67469	0.250962	3.55336	4.2149	6.09508	3.53605	3.0036	3.85798	4.78869	0.0976108	3.88947	0.0840643	3.80426	4.38405	4.16752	4.03738	6.02215	4.83441	6.73552	0.799087	0.0426443	0.0143553	1.33914	4.6837	5.95652	3.96162	0.137504	6.78136	2.05658	4.03386	0.555816	0.286881	3.08236	1.76553	3.73769	1.67807	3.90014	5.6153	0.298658	1.0635	6.69056	1.41143	5.06781	4.61117	6.98993
ACH-002066	5.27463	0	8.28263	2.57531	3.34056	0.0565835	0.485427	6.66363	4.23726	3.82171	3.52231	4.91169	5.78372	0.0285692	2.68257	0.0703893	5.05094	5.5008	5.30195	3.31325	5.69321	7.17173	0.669027	0.0143553	0.0143553	1.26303	1.9222	3.88166	6.2902	4.43296	0	8.29866	2.71589	2.83996	2.10769	4.99594	3.75702	0.739848	3.22497	3.18745	4.48027	5.02547	0.485427	0.0703893	7.15502	3.41684	6.42442	7.15553	7.91797
ACH-001536	3.94111	0	6.00225	1.45418	1.36177	0.0143553	4.08831	6.30524	4.97545	3.58856	1.79909	1.90689	4.18507	0.933573	3.68594	0.0143553	2.85997	6.2114	3.71039	3.19849	5.85972	3.43162	8.25243	0	0	0.0285692	1.5656	3.39917	5.59902	2.97085	0	6.73457	0	2.9222	1.03562	1.80735	2.20163	0.739848	4.7148	7.52677	3.0036	4.53169	0.545968	1.89142	5.76049	0.400538	6.77189	4.97728	7.20789
ACH-000313	4.30159	0	5.57864	2.0036	2.37573	0.226509	5.7666	5.58736	4.60466	4.02059	2.31615	4.0197	5.13381	3.76553	5.41481	0.0976108	4.88118	6.27817	4.45154	2.67807	6.5741	7.66988	8.43392	1.32193	0.163499	0.0840643	0.189034	3.6837	7.49825	4.21257	0.0285692	6.89772	2.13422	2.43296	4.31687	4.90207	4.57168	2.36457	7.44112	6.74685	3.61117	6.08364	0.594549	1.77821	7.32607	0.613532	6.09761	4.77926	6.44112
ACH-002019	5.16591	0	7.05615	2.20789	2.62994	0.443607	1.55582	5.82579	6.14119	3.92979	2.9982	3.74416	4.61353	1.95977	5.43929	0	4.38474	4.77716	4.58256	3.10601	5.89748	5.19889	7.76321	0.124328	0.344828	0	0.584963	3.15866	5.48123	5.08874	0.0976108	6.98048	2.02857	1.29278	4.10266	2.51854	3.74201	2.12102	4.74147	3.56925	3.85599	5.45385	0.516015	2.67807	7.3996	2.34199	5.84775	4.70321	7.35544
ACH-000728	0.124328	0	5.63546	3.20789	4.74308	0.0143553	0.0840643	2.53107	4.97223	5.59066	0.887525	3.24336	5.65564	0	2.59694	0.0285692	4.31542	5.17712	5.37016	4.25475	4.86987	6.17712	7.22863	0.189034	0.0565835	7.93334	2.74631	4.77505	5.90785	3.90785	0	6.53434	0.0426443	0	3.35896	0.298658	3.41414	3.50589	4.17792	0.163499	3.8846	7.71493	0.659925	0	7.43704	2.57531	5.82018	6.67115	7.87449
ACH-000700	1.18903	0	7.24155	2.0036	4.24565	0.0143553	0.0426443	5.88093	5.88972	4.67638	3.18903	3.56803	6.71067	2.76977	2.16993	0.0143553	5.1334	4.46205	5.17433	3.7148	4.5472	6.10622	5.67158	0	0.0840643	0.565597	2.40871	4.59932	7.00607	3.52105	0.137504	6.96023	0.0976108	2.42492	1.80323	3.04089	3.17153	1.22651	5.58676	0.286881	4.32625	5.66959	0.475085	1.80323	6.67313	2.40327	7.1919	6.29241	8.09824
ACH-000823	5.54504	0.189034	5.58826	1.95606	3.76022	0.0426443	2.17632	4.69098	5.25475	3.61706	3.30597	3.75061	5.17672	0.0143553	3.33628	0	4.17153	5.86443	4.91934	3.67582	5.68257	4.64559	6.12846	0.978196	0	0.632268	0.757023	4.97223	5.82477	3.23419	0	6.72901	4.1375	3.02857	1.04264	3.80941	2.90111	1.32769	2.63227	0.137504	3.7301	5.65793	0.214125	0.823749	7.02547	0.464668	5.54133	4.41278	7.57077
ACH-000678	5.82043	0	7.2213	1.79909	4.20555	0.137504	0.189034	6.41261	4.79961	3.91169	1.91456	3.98368	5.52011	2.20163	1.62293	0.344828	3.86394	5.43296	3.78031	2.69599	5.63256	6.0018	7.47306	1.88362	3.49185	1.65992	2.56803	3.84699	7.13945	3.18745	0.83996	5.89142	0.275007	3.74631	4.88069	3.60407	3.67356	1.99639	5.0054	4.31034	4.13668	5.73715	0.333424	1.98185	6.81826	1.19535	5.43095	4.72629	7.81269
ACH-000006	0.163499	0	6.1152	2.76977	4.20555	3.87184	3.94205	5.26791	4.84097	5.08406	2.72465	3.61706	6.07703	0.0285692	2.75916	0.0285692	3.72792	5.67016	5.37191	3.65191	5.2709	6.13484	6.72506	0.400538	0.411426	0.0840643	0	5.55152	6.11207	4.65421	0.895303	6.38007	0.0285692	0.0143553	2.49057	1.04963	2.60407	3.53107	5.77268	0.226509	4.89918	7.59872	1.04963	4.23649	6.13955	1.88362	6.00045	5.47346	9.22292
ACH-002029	4.79961	0	7.28882	2.46205	4.27724	0	3.16832	6.14527	3.72683	3.47768	2.55336	4.01346	4.7447	0	2.27501	0	4.14893	5.97269	4.91073	2.98368	5.60822	5.1635	7.09075	1.15056	0.0426443	0.389567	1.79494	4.28983	6.15239	4.1334	0.137504	6.2709	3.45154	0.807355	0	2.88947	3.57652	2.19849	3.21101	4.72629	4.15623	5.53854	0.367371	1.04264	7.94691	0.163499	6.36947	2.33342	7.58286
ACH-001377	5.41143	0	7.31152	3.2854	4.69377	0.0285692	0.0703893	5.32265	4.79181	5.59066	1.86394	2.11437	4.70598	2.51349	1.10434	0.0840643	4.08491	6.81365	4.24184	3.55213	5.73796	6.14037	6.96786	1.23266	0.422233	0	0	2.60881	6.97097	3.70377	0.263034	6.45418	1.51602	2.29572	4.07468	4.45088	4.06695	2.37295	4.54164	4.85499	2.4489	5.26228	0.163499	0.903038	8.12272	1.34483	6.37295	3.20633	6.74403
ACH-000754	0.0703893	0	5.916	2.03914	3.8125	0.0143553	0.111031	3.80632	4.22497	3.88069	1.58976	2.67356	5.80761	2.4489	0.0703893	0.545968	4.79233	5.55182	4.73444	3.774	5.47606	6.94755	3.28983	1.94111	0	0.0285692	0	4.15218	5.3579	6.93946	0.0703893	7.51531	0.275007	0	0.739848	0.137504	2.72247	1.91839	7.49713	0.15056	3.5435	6.1035	0.475085	0.111031	8.20354	4.55582	6.80839	0.189034	7.99628
ACH-000465	4.20242	0	6.12205	2.51602	3.64386	0.298658	0.275007	5.28577	4.56742	5.22574	2.67129	4.85699	5.48864	3.07039	0.124328	0.659925	4.13996	6.75849	4.83895	5.26191	6.44609	8.23554	9.30248	2.86592	0	0.0976108	0.0143553	7.06674	4.96532	4.52732	0.0703893	7.374	2.10434	0.201634	4.30524	5.21296	4.71973	3.17951	4.23573	0.201634	3.77083	6.27836	0.933573	3.28688	7.38517	3.08746	6.79844	5.65421	7.57698
ACH-000138	5.22574	0	6.30451	2.854	3.51475	0.0143553	3.74093	5.45154	6.50653	4.15056	3.12267	4.65535	4.28244	3.41954	1.64155	0.176323	4.56803	5.1127	4.57046	2.43829	5.7498	5.8846	8.03848	3.86888	1.15056	0.713696	0.0143553	3.82375	7.64024	4.05658	0.475085	5.68734	0.695994	0.669027	5.24641	3.42089	3.91648	2.82985	7.28207	7.29499	3.58736	5.59604	0.555816	0.831877	6.88777	1.02148	5.01033	3.13586	7.06167
ACH-001864	5.97568	0	7.76394	3.12433	3.29719	0.0565835	6.57818	6.38336	7.68306	4.16108	2.95791	4.40667	4.98003	4.38267	3.34199	0.263034	3.70929	4.42223	4.24869	2.8339	5.92505	5.88996	6.90304	1.58976	0.321928	0.0285692	0.201634	3.27798	7.78496	4.26153	0.321928	6.64731	1.41684	1.9855	4.71094	3.35755	2.80735	1.68706	4.63169	5.66732	3.97545	4.21645	0.422233	0.163499	7.29057	1.12433	6.68412	3.87184	8.26162
ACH-000383	5.21684	0	6.47897	2.53605	4.19219	0.0565835	0.111031	6.42324	5.14364	4.21956	2.68482	3.90785	5.1819	2.09424	2	0.0426443	6.26604	7.10559	5.7412	3.59096	5.7211	6.06523	7.32166	4.47054	0.137504	0.275007	0.0840643	4.10601	8.989	3.88069	0.0285692	6.90557	0.201634	0.782409	5.85325	4.29425	3.76871	2.44361	6.41616	4.92172	3.82477	5.84549	0.475085	2.73552	6.99164	3.16993	6.74079	4.52857	7.18606
ACH-000917	4.64443	0	5.63052	3.24793	4.66789	0.124328	5.55582	5.77505	6.16209	4.11936	2.488	3.75489	4.79597	2.89336	5.1534	0.687061	3.72574	4.70266	4.14486	2.33628	7.08012	5.5472	8.01346	2.18587	2.14731	0.495695	3.64962	5.03694	6.25475	3.84499	0.31034	6.19338	1.76977	2.93923	6.2116	5.66874	4.63865	2.41143	4.26379	4.49121	4.24108	5.55857	0.863938	4.28836	6.9806	4.67751	7.66007	4.28096	7.60548
ACH-000984	1.55582	0	6.55612	2.16672	3.87578	0.0703893	0.111031	7.27062	5.77663	4.06178	3.07724	4.20242	6.09592	3.98732	1.852	0.0143553	5.03166	5.10392	5.57016	3.56071	6.49281	6.67751	6.49073	0	0.0285692	0.0976108	0.0143553	4.75756	7.2077	5.27836	0.0840643	6.86481	0.0143553	3.31179	0.0285692	6.83124	5.06695	0.214125	4.88753	0.831877	4.35403	6.70418	0.895303	0.0285692	8.13627	2.27501	6.5735	3.28392	8.04478
ACH-001409	6.48236	0	7.59126	2.32481	4.67073	0.0285692	4.99005	6.2765	4.09508	3.95884	3.62059	5.33163	5.63981	1.10434	3.09592	0	5.25058	6.73742	5.12143	2.32769	6.50795	7.34305	7.49193	4.6153	0.0840643	1.34483	0.739848	3.36877	6.94708	3.82171	0	7.5697	2.28688	3.45286	2.75916	1.05658	3.76341	2.57773	4.42492	6.60244	3.64501	5.36702	0.475085	0.933573	8.37782	1.68257	6.06307	2.18587	7.45935
ACH-001707	0	0	5.13052	2.36457	1.69599	5.76235	0	3.53605	2.20477	3.33199	1.1177	1.99277	4.73877	1.94111	0.0976108	0.0426443	3.07039	3.10769	4.06867	1.53107	4.03034	5.24336	6.62322	0.226509	0	0.111031	0.214125	5.59036	4.70874	5.40871	0	5.49506	0.594549	0	1.63691	2.01436	2.0036	1.99277	5.90833	0.0703893	4.28021	6.22901	0.400538	0	6.56651	2.20477	5.31578	0.275007	6.63677
ACH-000117	4.0505	0.0565835	7.60251	2.9855	3.67807	0.0143553	0.0703893	5.58225	5.25588	4.16993	2.24489	4.79442	5.50938	2.30159	4.86295	0.275007	4.37712	5.5245	4.52482	2.90881	5.83112	5.82604	6.42341	0.0703893	2.37295	0.0143553	0.263034	2.89336	8.61545	2.81147	2.80735	5.47476	1.7137	0.0565835	4.37851	5.36737	2.80735	0.0565835	3.55459	1.33914	2.90497	5.79857	0.275007	0.941106	7.84354	1.0635	5.81711	5.04221	7.1471
ACH-000999	5.16189	0.464668	6.67849	2.48285	3.32625	1.48543	0.0565835	5.96809	5.15583	4.8125	2.28096	4.28762	5.65249	3.38543	3.07382	4.87381	4.12102	6.36912	4.34056	3.58015	5.78424	6.15502	7.51381	1.64155	4.46923	0.432959	0.298658	3.78764	6.35332	4.0009	5.23304	6.6844	2.44626	0.799087	4.60407	5.17632	3.90593	1.37295	4.1819	0.495695	4.28762	5.82604	0.432959	1.20163	7.55059	2.92029	6.85112	4.46663	7.75161
ACH-000633	5.57652	0	7.91612	2.97636	3.93074	0	0.0840643	8.01603	4.48929	4.85649	1.62293	2.31325	5.21568	0.250962	3.65421	0.0143553	4.31397	7.32859	4.916	3.58135	5.39506	5.94087	9.52931	0.0285692	0.695994	0.137504	2.43296	4.1811	6.59813	4.67243	7.30816	7.64688	5.84549	2.99458	0.495695	5.25323	3.85699	3.42223	5.25285	0.333424	3.79597	5.76713	0.910733	5.21529	7.2151	3.78869	6.55259	6.59529	7.02447
ACH-000520	4.07382	0	6.30415	1.87184	3.37295	0.0285692	3.28836	6.02813	5.27873	4.07211	3.22033	4.25172	4.83592	1.95977	3.0635	0.0143553	3.06523	4.79025	2.81762	3.17951	5.96602	5.57833	7.61839	0.0703893	0.0285692	0.0143553	1.98914	6.23879	7.43379	4.07125	0.111031	6.89227	1.25096	0.124328	2.30743	1.79909	4.70155	1.07039	4.97591	5.78555	3.57652	5.6153	0.378512	3.41684	6.8874	2.12763	5.90665	6.27966	8.01463
ACH-000176	1.50589	0.0285692	6.9991	2.01792	3.60288	0.0143553	0.545968	6.99695	4.17871	4.10769	3.63691	4.89482	5.15259	0.356144	2.02857	0.0285692	5.28688	6.15381	5.44593	2.96532	7.0649	5.71149	7.0289	0	0	0.111031	1.774	4.84549	7.7003	3.85997	0	6.76421	0.163499	0.526069	0.594549	2.60644	4.24031	1.41684	5.33342	6.69544	3.78764	6.05637	1.37295	0.807355	8.35834	2.16672	6.38905	5.56102	7.59999
ACH-000017	3.09085	0	7.00068	3.27202	3.8953	0.0143553	0.0976108	5.15623	4.44758	3.41278	1.64155	3.73118	5.0751	1.4489	6.2878	0	4.7301	6.10915	5.16229	3.07039	6.21568	4.8485	6.52105	0.238787	0.526069	0.0285692	0.0565835	4.24413	6.0594	2.76765	0.124328	6.35173	1.17632	0.137504	5.54936	2.29866	3.4957	0.163499	4.04527	0.887525	3.63343	5.77558	0.475085	0.15056	8.60559	1.19535	7.67334	2.59216	7.2651
ACH-000020	0.0976108	0	5.52701	2.58256	3.96717	0.0285692	0.111031	0.678072	4.8334	4.87036	2.31325	3.57652	5.98299	0.0143553	2.14731	0.0143553	3.9514	4.54905	4.98504	4.11853	5.31651	6.22978	8.86477	0.0143553	0.0285692	0.226509	0.632268	7.18438	5.26941	3.44228	0.0565835	6.92398	0.454176	0.0840643	1.32769	0.201634	2.83592	3.60288	3.54473	0.250962	4.01346	7.3881	0.83996	0.0143553	7.12091	3.66562	6.04636	6.29002	8.00534
ACH-001385	4.40463	0.0143553	5.46401	1.4489	2.53356	0	0.0426443	0.0285692	5.57894	3.19219	2.22651	1.58976	4.73769	0.963474	5.27724	0.0143553	2.94673	4.16027	3.79077	3.70598	3.28688	4.21179	7.21965	2.25701	0.0143553	0	0.0143553	2.79286	5.35896	2.98185	1.73552	5.749	1.72247	0.0285692	0.238787	2.64386	2.73335	0.0285692	1.5509	0	4.06523	6.7343	1.4489	2.7761	7.32355	2.62761	5.36036	1.38405	6.25871
ACH-000587	4.92552	0	6.18804	2.08066	3.3147	0.0143553	1.04963	6.22554	4.25927	4.71644	2.32769	3.67694	6.15381	0.604071	3.20006	0.0565835	5.06867	5.71946	5.03474	3.16189	5.53543	5.43196	6.93793	0.669027	0.321928	0.15056	1.98914	4.78764	6.91157	3.68818	0.0703893	6.32607	0.286881	3.10266	0.275007	2.40599	3.99548	2.43296	4.67073	5.97636	4.25248	6.23036	0.238787	0.722466	7.83238	2.21412	6.66647	3.74524	7.5763
ACH-000785	5.71864	0	6.19731	2.926	2.65992	0.111031	0.111031	5.55827	6.01903	4.46728	2.9222	4.10014	5.82553	3.45549	2.45943	0.0976108	5.00675	5.29866	5.67835	4.11353	4.66562	5.32733	7.92416	1.30451	0.226509	0.15056	0	3.71699	6.63285	4.34837	0.250962	6.24793	1.41684	3.8125	6.77545	4.44758	3.76341	1.86394	4.749	7.56476	3.65992	6.04876	0.659925	5.16792	7.96492	2.53605	6.36265	3.80219	7.24698
ACH-000554	4.53605	0	6.08002	4.21801	4.38888	0.0703893	0.214125	7.10622	5.37295	4.41414	1.67356	1.86394	4.95884	2.95047	4.58976	0.0143553	4.18587	4.96116	4.79494	3.84298	5.58346	5.44493	6.49442	0.176323	2.76553	0.0565835	0.0143553	3.86987	6.89069	2.95977	0.565597	6.47444	3.41954	2.3978	5.4019	4.45352	4.31542	0.286881	4.80581	3.97911	4.10769	5.59395	0.526069	0.0285692	7.6681	0.584963	6.05658	6.23266	7.33994
ACH-001398	4.80632	0	6.72247	1.61824	2.83188	0	5.7046	5.93121	4.44493	3.60288	2.58976	3.05832	5.04002	1.31034	3.02857	0.176323	5.08194	5.51791	5.17393	2.81352	6.04439	5.35262	7.08385	1.10434	0	0.0840643	3.69377	3.66448	5.68313	3.19377	0	6.52935	3.39369	0.799087	0.613532	3.78555	4.0197	1.50589	5.97774	7.13761	3.98368	5.50176	0.641546	1.91073	8.00039	0.286881	6.35085	5.00764	7.39025
ACH-001991	6.80503	0	6.49233	3.0072	4.43029	0	0	4.42223	5.48639	4.29352	2.92029	3.65535	4.99639	2.22342	6.64241	0.0565835	3.68145	6.42425	5.11353	2.79077	5.59962	6.13196	0.201634	0.536053	0.189034	0.0840643	0	4.01167	7.00214	3.82579	7.27249	6.11312	2.16027	0.124328	4.16269	6.04374	4.03562	0	5.15906	0.176323	3.83996	5.79675	0.214125	0	8.07644	0.275007	6.21626	1.48027	7.53496
ACH-001709	0	0	6.3156	2.73118	4.94205	2.85599	0.0426443	3.40054	3.87184	4.17792	3.32193	3.33914	5.49313	2.43829	0.111031	0	3.61941	4.80426	4.46663	3.79077	4.58616	4.48349	5.44989	0	0.0840643	0.0703893	0	2.97636	6.48494	5.14853	0	6.14262	0.321928	0	1.58976	0.111031	2.56316	1.20163	5.23496	0	3.72356	5.53076	0.526069	0	7.15502	2.20477	6.41515	1.58496	7.08268
ACH-001332	4.59515	0	6.71149	1.26303	3.19377	0.238787	0.0143553	5.74335	4.99594	2.74201	3.07211	4.13422	4.56255	0.83996	3.0635	0	3.40599	5.54597	4.29352	2.68706	6.05723	3.64155	5.93357	0.903038	0.956057	0.0703893	1.01436	4.36947	5.80529	3.22497	0.0426443	6.31234	2.88753	0.333424	0.963474	1.4957	1.90689	0.879706	3.2854	1.38957	3.29572	3.70487	0.238787	1.37295	6.96567	0.903038	5.20711	3.45022	7.19348
ACH-000585	3.56682	0	7.01892	1.9222	4.25096	0.0285692	0.0565835	5.04089	3.35332	3.55336	2.38681	3.85699	5.28244	1.39506	0.782409	0.0703893	5.78529	6.10203	5.8627	3.18745	6.01502	4.96486	7.14333	2.1177	0.15056	0.333424	0.422233	5.25852	6.94767	3.89142	0.124328	6.67426	1.15056	1.85997	1.26903	3.5509	3.90977	2.37851	5.62059	1.87971	3.53978	5.42122	0.918386	1.30451	6.68229	1.33914	5.94322	4.38957	6.80761
ACH-000550	3.46728	0	6.94509	1.94486	3.54597	0.0143553	3.90207	5.62176	3.24336	3.45549	3.18269	4.52105	5.76686	0.0426443	2.04264	0.722466	4.46467	5.58916	5.20516	3.93263	6.31397	5.67243	9.21459	0.15056	0	0.0285692	0.0143553	7.07178	7.67807	4.45286	0.124328	7.80374	1.15056	4.27575	0.695994	2.61589	3.90111	2.29866	4.31325	1.02857	3.8125	6.54458	0.422233	0.0285692	7.49281	3.60526	6.17473	4.28614	7.85262
ACH-000627	4.70984	0	6.51633	1.69153	3.0993	0.0426443	0.0703893	6.47216	1.9855	3.89918	3.93546	4.92647	5.69432	3.37434	1.70929	0.238787	4.91361	6.92303	4.45088	3.40871	6.50922	5.65134	8.67839	0.163499	0.263034	0.0143553	3.30743	5.48607	7.29875	4.57168	0.263034	7.47168	0.970854	3.48929	2.20477	3.80426	4.22882	2.15056	5.67976	2.48285	3.64616	5.73091	0.739848	2.38681	7.16912	2.13093	6.53776	4.89966	7.59148
ACH-000704	5.01837	0	6.99594	1.84398	4.03122	0.0143553	0.0426443	6.24451	3.7366	4.8089	2.12102	1.74416	5.78947	1.18903	2.97269	0	3.64616	5.50462	3.95327	2.54844	6.61956	5.43729	6.92683	1.92979	0.214125	0.0143553	0.0143553	3.87578	7.16672	4.01614	0	5.8679	4.83946	2.5509	0.584963	2.66676	2.89142	0.226509	4.72574	3.72901	3.35896	4.58676	1.79909	6.4949	7.92422	0.925999	6.84109	6.4957	6.88679
ACH-000276	4.62	0	6.42643	2.57773	4.30743	0.0840643	2.90497	6.39386	4.23343	4.26604	2.20477	3.46467	5.11478	3.88264	3.74631	0.0143553	6.39815	6.8786	6.17632	3.19219	6.77413	5.88264	6.07318	0.176323	0.0285692	1.67807	1.64155	4.86839	7.93634	4.89385	0.321928	6.33557	0.594549	3.11103	4.41278	4.54473	4.88118	0.0976108	5.27836	2.36457	3.87774	6.23879	1.04963	0.0565835	8.83438	3.62994	7.23113	4.29425	8.359
ACH-000075	3.81865	0	7.05528	1.95606	3.50589	0.0143553	3.20789	6.05745	4.58075	3.25399	2.47768	4.6241	5.49378	2.52857	0.189034	0.594549	4.53854	4.87381	4.9644	3.32912	6.46025	6.52184	8.08433	0.0143553	0.0426443	0.176323	3.14731	4.17313	7.02436	4.17552	0.0703893	7.48535	2.80735	2.18587	0.124328	1.84398	4.44029	2.03562	5.57592	6.87971	4.05398	6.51617	1.09761	0.0285692	7.67638	3.38957	6.79961	3.64155	7.90881
ACH-000818	4.09339	0	6.42794	3.72465	3.23726	0.0703893	0.0840643	4.44758	5.08406	4.80941	2.51096	3.82883	5.02059	2.66676	6.81622	0.226509	5.03254	5.5738	5.24146	3.52732	6.29094	5.82553	6.53481	0.0143553	0.31034	0.0426443	0.0143553	4.25927	6.78973	4.21179	3.82375	6.49793	1.48027	0.226509	6.10727	6.92979	3.67469	0.0703893	4.23802	0.495695	2.61824	6.93782	0.356144	4.08576	8.24812	3.97269	6.19731	6.89154	7.26332
ACH-001616	0	0	5.39951	1.69153	1.37851	0.275007	0	1.05658	4.62176	3.0018	1.68706	2.18269	4.44493	2.30743	0.0840643	0.0426443	3.47379	4.66732	4.29939	2.88166	3.57652	4.23802	5.36001	0.669027	0	0.298658	0.0285692	6.92339	4.61765	3.28688	0	5.70957	0.0285692	0	3.5435	0.263034	2.25701	0.0976108	2.78241	0	3.71589	5.94345	0.495695	0	6.33038	1.74846	5.63227	3.16993	6.18011
ACH-000625	5.62732	0	6.25153	3.08916	4.17871	0	1.09761	6.90123	4.8515	6.49378	2.01078	2.5008	4.93168	2.26003	3.33628	0.594549	3.7845	5.38578	4.54411	3.65535	5.4266	6.30852	6.15846	0.250962	0	0.0285692	0.0426443	5.62965	7.52403	3.80219	0.731183	6.51396	1.1635	4.49761	6.70127	4.62176	4.6893	2.37851	5.23419	5.94251	3.59813	6.05115	0.963474	4.47832	7.54551	1.36177	6.8748	6.91874	7.15694
ACH-000941	3.73335	0	5.95117	1.97085	3.47119	0	1.40599	5.13873	5.21956	4.10014	2.90111	3.93168	4.20711	2.86394	5.42358	0.400538	4.33128	5.32337	5.09297	4.41549	5.20867	5.1639	6.00675	0.695994	0.0143553	0.137504	0.124328	4.22882	7.57304	4.27873	0.124328	6.87418	3.21723	2.488	4.30086	5.15056	3.70377	0.0426443	4.3875	4.4019	3.80941	7.28799	0.367371	0.0703893	7.39266	1.04963	6.69544	5.09845	7.79064
ACH-000392	5.77426	0	6.36107	2.71809	3.76235	0.0285692	3.31325	5.00675	4.70764	3.23266	1.96717	3.14568	4.79753	3.24793	0.321928	7.08034	3.26003	6.26416	3.61471	3.15218	4.81967	5.27947	5.86962	3.80839	0.286881	0.263034	0.275007	3.73227	7.44667	3.86394	0.970854	6.95896	0.464668	0.536053	5.50398	4.24717	3.06178	2.49313	5.99932	5.37678	2.9982	5.4957	0.495695	2.78031	6.44328	1.774	5.17513	2.30743	7.13299
ACH-000269	3.97453	0	6.40054	2.02503	4.0365	0.0426443	2.852	6.07017	3.41414	4.4522	3.33628	4.53294	6.2948	0.0565835	1.926	0.111031	3.83592	3.72137	4.55397	4.00899	6.25758	6.01636	7.71706	0.344828	0.238787	0.0426443	1.53107	5.1102	7.87363	4.27724	0	7.07831	2.80116	0.15056	0.0840643	1.3505	3.79805	1.94111	4.89482	6.54241	3.75489	6.01346	0.367371	0.0285692	6.53481	2.88753	6.65664	3.96717	8.29112
ACH-001670	5.83238	0.111031	6.32481	2.34483	3.66107	0.0840643	0.0565835	0	4.24031	4.46205	1.78241	2.83794	5.52669	2.90497	2.50589	0.298658	3.83289	6.10287	5.07382	3.78136	5.57319	4.59991	8.76553	0	0	0	0	3.83693	5.78607	3.20163	3.07039	5.92196	4.55888	1.33342	0.0976108	5.16912	3.17153	0.773996	3.39094	3.19377	3.5097	4.83137	0.176323	0.863938	7.46655	2.72901	6.24146	5.42358	8.02945
ACH-000856	6.42526	0	6.30542	3.27798	4.06178	0.137504	3.02857	6.16852	4.63807	5.04745	2.99095	3.24793	5.40054	3.08576	3.84197	2.72028	4.74093	5.51728	5.4522	4.62117	5.73363	5.10643	8.47379	1.31615	0	0.201634	1.03562	4.27202	6.72942	3.82273	0.176323	6.52873	0.163499	0.847997	2.06695	4.65249	4.14975	2.24489	5.43729	7.49649	4.80012	7.35385	0.62293	0.0565835	7.73295	2.72247	6.05745	7.99339	7.2949
ACH-001119	0	0	5.21645	2.76977	2.89336	0.0285692	0.678072	3.26003	3.55827	3.23573	2.62293	2.79494	4.11603	3.89724	0.214125	3.63807	3.44095	4.62527	4.37712	2.52607	4.40871	5.24793	9.18624	0	0	0	0.0285692	2.58015	4.21645	3.66562	0	6.6837	3.5373	0	6.33682	0.163499	3.0268	0.298658	6.58075	0.0703893	3.60881	5.58135	0.286881	0	6.2681	2.23573	5.68257	0.722466	6.87504
ACH-000376	4.2032	0	6.54936	2.07724	4.1177	0.0285692	5.19101	6.53683	4.71149	4.14323	1.61824	3.99729	5.88606	0.0565835	1.852	2.93357	4.94907	5.34163	4.97361	2.98003	6.51759	6.06286	8.38211	1.13093	0.0426443	0.163499	2.57046	4.36667	7.40837	4.64212	0	6.93605	1.95977	0.941106	0.0565835	4.56194	4.21956	1.36737	3.16027	5.63052	3.93546	6.29664	1.09085	2.10434	7.67716	3.59694	7.1126	4.52795	7.71534
ACH-000685	5.06437	0	6.30214	2.41414	3.88753	0.356144	6.58451	5.11103	5.98254	3.76765	2.03562	4.19535	4.89142	1.38405	3.6792	0.389567	4.19061	6.09487	5.1823	3.18903	5.34731	4.96023	6.19397	2.37016	0.739848	0.189034	0.650765	4.10769	6.37903	3.58736	0.0565835	6.32966	2.75275	2.35332	4.67186	2.74201	2.95233	2.38128	4.29866	3.93074	4.22188	5.72547	0.555816	5.63052	5.62147	2.33342	5.58646	4.14812	7.18021
ACH-000729	5.75702	0	6.14771	3.08406	5.07938	0.321928	0.124328	2.93168	3.93263	5.44029	3.18745	4.74039	5.97177	3.59932	3.13422	0	4.42828	6.55382	5.65764	4.17393	6.93981	5.22458	2.40327	0.903038	0.0840643	0.0565835	1.87971	4.82883	4.94533	3.85	0.163499	5.94369	4.49889	0.918386	6.15239	6.90641	4.62936	0.31034	4.39575	0.238787	4.33056	6.36107	3.83086	0.411426	8.16461	5.39746	6.42492	5.51254	7.77564
ACH-001034	5.05094	0.31034	6.1809	2.84398	5.42425	0	0	0.0285692	3.19377	5.74524	2.32769	2.41143	5.34696	0.495695	3.29572	0.604071	4.45812	7.15896	5.01302	3.47119	5.26529	5.69961	9.50904	0	0.0426443	0	0.0840643	4.60526	6.64904	3.95699	1.70487	5.88947	5.33521	5.8301	0	3.43563	4.61589	0.887525	4.52857	3.66676	3.82477	6.11853	0.214125	0.333424	7.15462	2.36737	6.28522	2.20789	7.49049
ACH-001283	5.80761	0.111031	6.36842	1.95606	3.63343	0	2.05311	0	3.24945	4.82426	2.68706	2.7761	5.36457	0.678072	2.91648	0.214125	3.10936	5.71781	4.50016	3.61589	5.47119	5.6153	10.1316	0	0	0	0	3.88166	5.26716	4.07211	1.50589	6.38543	4.73444	6.38922	0.0565835	1.96347	3.30889	1.82375	3.79494	3.86987	2.6893	5.73552	0.298658	1.51602	6.78254	2.65764	5.74739	4.2149	7.3249
ACH-000880	6.03782	0	6.53481	3.0635	5.33735	0	0.0285692	7.22738	5.05355	5.15866	2.36737	3.62059	5.1206	2.56071	4.71205	5.58376	4.51412	5.84775	4.61765	3.29131	5.07211	6.22091	8.72465	1.02148	0.263034	0.0426443	0	4.25096	6.91169	4.15947	0.0703893	6.98391	0.0426443	0.505891	4.79857	5.51159	4.46989	2.43029	5.06867	0.176323	3.74093	6.86987	0.748461	0.823749	7.57054	3.24031	6.58271	0.389567	7.37573
ACH-000035	4.88801	0.0285692	7.25484	2.28983	3.79597	0.111031	0.367371	6.25285	4.21412	3.60051	2.93168	4.24869	5.20006	1.3505	4.47703	0	4.88655	5.28281	5.06738	3.79286	6.35262	6.36265	7.3978	0.659925	0.0143553	0.0143553	0.722466	5.18031	7.83491	3.7761	0.321928	6.52873	0.443607	3.75809	2.34483	4.89724	3.77189	2.03914	5.61618	5.9486	4.05224	6.43613	0.378512	0.0565835	7.95594	0.773996	6.72274	6.49905	8.03254
ACH-001200	3.32193	0	5.82043	2.33056	4.00899	0	1.5509	6.86245	3.51349	3.98732	2.31325	3.67129	5.49761	2.64616	0.632268	0.275007	4.97774	5.9939	5.13709	4.22419	4.90545	5.29131	10.6769	0.0143553	0	0	0	4.09255	3.41414	3.75382	0	5.72301	0.704872	6.32859	4.77452	5.36562	3.58135	0.0143553	3.68706	1.09761	3.78346	6.92636	0.887525	0.201634	7.68264	2.9782	6.21121	2.73552	6.69905
ACH-000194	3.68032	0	5.98277	2.18587	3.56071	0.0285692	4.9905	6.25852	4.16189	4.08576	3.29131	5.74389	4.72792	0.0840643	4.19219	0.516015	4.82579	4.91073	4.83441	3.33914	6.09149	5.77847	9.45522	0.298658	0	0.432959	0.263034	4.45022	7.85069	4.02059	0.163499	6.18448	1.73985	0.201634	1.37295	0.678072	4.10852	1.02148	5.22342	6.14241	3.47638	6.65249	0.536053	0.0285692	7.35067	2.5509	6.10182	6.12184	6.95257
ACH-000322	2.82579	0	7.77268	2.47508	3.90977	0.0976108	1.39506	5.98117	3.95884	4.46401	2.80529	4.30816	5.0387	0.678072	1.46467	0.367371	4.73227	5.20242	4.98868	3.37016	5.61147	5.85922	8.81423	0.189034	0	0.226509	1.60407	4.80787	6.44095	4.30159	0	7.65907	1.1635	1	2.28688	4.62819	3.7939	0.731183	4.42358	1.9486	4.05398	6.47265	0.432959	0.545968	6.96959	3.51602	6.82896	6.59857	7.90026
ACH-000552	4.39985	0	6.71836	2.7845	3.46858	0.0143553	4.08151	5.35509	5.10098	4.32481	2.7845	4.39094	5.80503	2.27798	3.07895	5.58556	4.61117	5.75435	4.58316	2.774	5.68089	6.05311	2.75275	2.82579	3.55213	0.111031	0	3.8268	7.60711	4.14323	0.422233	5.80116	0.0703893	0.201634	5.39849	3.20633	3.16832	1.74416	4.59276	6.15076	3.99367	5.55367	0.15056	1.20163	7.68776	2.28688	5.91815	5.01525	7.91504
ACH-002508	5.55674	0	6.86196	2.22033	2.84398	0.0143553	4.78816	5.52951	4.0365	3.46336	2.34483	3.849	5.64703	0	0.214125	0	3.60526	4.75382	4.21257	2.82171	4.73823	6.24489	6.62979	0	0	0.0285692	0.0285692	5.43796	7.49257	4.24717	0	6.86481	0	0	0.992768	0.536053	4.33914	0.0703893	3.84298	7.03144	2.96532	5.80064	1.02857	0.871844	6.1471	1.852	5.73227	3.04789	7.41962
ACH-000222	5.92955	0.111031	6.34589	2.61117	2.27501	0.0703893	0.0565835	5.47994	5.60021	3.89239	2.774	3.9279	4.61648	1.26903	0.137504	0.0143553	5.06609	6.18706	5.42828	3.54226	5.24298	4.97131	5.67214	3.1127	6.16209	0.526069	0.992768	4.73769	7.19751	3.51475	8.49889	5.88289	0.0285692	0.903038	4.33414	1.07724	4.27128	3.23266	6.63952	7.06609	3.55336	6.34855	0.613532	0.0285692	7.58886	2.02857	5.06566	4.50398	6.77189
ACH-000260	0.286881	0	6.4192	3.20006	4.21801	0	0.9855	4.80168	3.87381	5.58195	2.67807	3.13258	5.42928	1.10434	1.17632	0.0426443	4.6153	5.22381	5.10392	3.85798	5.67073	5.89336	8.57304	1.55582	0.137504	0.0143553	0.298658	4.56682	6.35085	4.32409	4.99548	7.11416	4.57713	0.356144	3.99277	2.73118	4.33128	0.831877	4.90881	4.90881	4.1914	5.84071	1.33914	4.78921	7.06016	3.35473	5.41583	6.12081	6.96266
ACH-001652	4.55888	0	6.23993	1.67356	3.08066	0.0143553	1.1635	5.92505	1.26903	2.62527	3.24031	3.31615	4.86047	0.704872	3.06005	0.0143553	2.4957	3.59932	3.03738	1.79909	5.67356	3.95047	6.68692	0.250962	0	0.124328	0.757023	5.13873	7.16259	3.20163	0	6.31052	1.36177	1.39506	3.04264	2.70266	2.82171	1.02857	3.18269	5.46891	3.45154	4.64904	0.344828	0.238787	7.02813	2.54844	5.81634	3.73227	7.54373
ACH-000608	4.77821	0	5.95699	2.04614	3.88069	0.201634	0.790772	6.6605	4.0027	4.23343	3.34908	4.02503	5.06695	3.10936	5.13175	0.0703893	5.31179	6.84912	5.45022	3.1375	7.41312	5.94064	7.57803	0.536053	0.0703893	0.137504	0.263034	5.48671	6.61029	3.66107	0.124328	6.70625	0.0703893	2.58496	5.90472	2.9982	4.0009	3.73444	4.99865	3.32625	4.56499	5.67101	2.32769	6.26191	7.19061	4.20006	6.07746	6.01948	6.48752
ACH-000501	5.3875	0.0285692	6.38543	2.15704	4.0045	0.111031	0.333424	6.03056	3.76977	4.23036	2.31325	4.40531	5.45746	1.91839	3.46989	0.176323	3.77294	4.42425	3.72465	3.7761	6.31415	6.46712	8.53496	2.08746	2.60881	0.432959	0.31034	4.58195	6.72738	3.24641	0.15056	6.62278	0.275007	1.37851	4.57168	3.63691	3.30159	1.52607	5.35297	0.584963	2.76129	6.04614	0.584963	1.12433	7.14995	1.57531	5.41785	2.96162	7.09919
ACH-000612	0.111031	0	5.92386	2.86987	4.10685	0.137504	4.42358	2.9279	4.11103	4.07039	1.48543	4.14975	4.88215	3.6017	0.0840643	2.58736	4.59515	4.83794	5.23573	3.83592	5.19889	6.47719	5.53232	0.0976108	0	0.333424	0.137504	5.48349	7.62826	5.32048	0.0840643	6.76062	0.0565835	0.0285692	2.81147	0.575312	2.82375	3.76447	8.83763	3.86196	4.17632	7.20574	0.650765	2.26604	7.36203	3.9364	5.74201	2.19219	7.49625
ACH-001184	5.05875	0	7.147	2.33056	4.56986	0	0.790772	3.82985	1.7866	4.2426	2.34767	0.948601	5.53792	1.85599	2.75489	0.124328	3.04439	3.851	4.5472	3.6565	3.3147	4.79961	4.92125	0	0	0.0285692	0	3.774	3.78555	3.86493	0	5.79077	3.88947	1.63691	0.722466	4.44626	3.03386	0	0.454176	1.83592	4.3427	6.26115	3.14893	2.70044	6.61014	2.03914	5.94158	3.72356	7.40259
ACH-001688	4.78188	0	4.30159	1.89918	2.15056	0	1.20789	4.20477	1.83188	2.69822	1.78241	1.99277	4.74255	0.765535	1.23266	0.0426443	3.71039	2.99639	4.59156	3.82375	4.3978	2.49057	7.58706	0.344828	1.68706	0.15056	0.137504	4.14731	5.60437	2.71589	0.124328	4.75489	0.903038	0.124328	4.21878	3.22805	2.7761	1.17632	4.47897	4.87725	3.36877	5.88606	0.389567	0	7.15137	0.389567	5.20438	1.50589	5.9697
ACH-001838	5.18626	0	6.30433	2.28688	2.63227	0.0143553	3.89821	5.78999	3.71809	3.1375	2.53356	3.55336	4.19692	1.65535	0.871844	0.62293	3.66334	5.2555	3.9644	2.4489	4.05745	4.96394	6.31832	2.32769	0	0.111031	0	3.23573	5.70155	3.48285	0.0143553	5.86443	0.0703893	0.321928	4.68594	3.23726	3.11437	1.51096	5.62965	5.85848	3.5656	5.22651	0.604071	3.22651	6.92861	0.0840643	4.93263	2.85798	7.95117
ACH-000638	5.84046	0	6.39163	3.10936	4.43896	0	6.09614	5.57137	5.39129	5.08406	3.19849	5.5744	5.68678	4.60348	1.93734	0.0840643	5.18982	5.2292	5.53512	4.16591	5.90929	5.68762	7.25531	2.1177	1.53107	0.176323	0	3.73227	7.2151	3.5656	0.201634	6.78123	0.0703893	2.19849	4.83845	4.37156	3.3799	3.32625	7.12794	5.75622	3.9364	6.25096	0.378512	0.0426443	7.89057	2.64616	7.1634	5.88728	7.99622
ACH-001846	5.66249	0	6.24945	2.06695	4.02148	0	5.83036	5.76765	5.12143	4.51791	1.07039	3.23573	5.06221	3.904	0.687061	0.565597	4.8802	7.21451	4.53605	2.35614	4.62819	5.65019	5.1206	5.16269	0.0285692	0.0426443	0	3.87971	7.68685	3.64155	0.214125	6.72955	0.15056	1.61824	4.91073	5.02724	3.32625	2.4957	6.77781	7.28845	3.26754	4.75061	1.20163	1.24489	7.32634	1.1635	6.34554	0.9855	6.50224
ACH-000798	5.46434	0.0565835	5.46858	2.07724	2.61824	0.0703893	0.0703893	6.39146	4.87774	3.3978	3.19061	4.56194	4.4363	2.41954	5.48736	4.56925	3.5509	5.76315	3.59574	2.57531	5.5008	5.60644	6.93416	2.01436	5.75355	1.09085	0.0143553	3.39094	7.24726	3.89918	1.76977	6.97831	0.0143553	0.0840643	5.33307	2.28688	3.7761	2.55582	5.16551	2.41414	2.93734	4.90497	0.275007	0.695994	7.1808	2.54102	6.12825	3.93263	7.51412
ACH-001321	1.01436	0	6.1373	3.41278	4.12598	0.0285692	4.32984	5.1807	5.58767	5.31542	1.94111	4.09255	2.95791	4.98231	5.98162	2.43563	4.78973	7.44311	5.06953	4.41414	7.04089	5.59365	7.17523	2.7761	6.73958	0.176323	2.39232	3.31179	5.48929	3.48285	7.98721	7.55275	4.65076	0.0285692	6.43179	4.97957	4.10852	0.111031	4.65019	2.53107	3.65764	6.53076	3.65535	5.10559	7.70515	4.57773	5.75248	7.08587	7.35614
ACH-000894	6.80413	0.0143553	6.35473	2.60407	4.02148	0.0426443	5.16148	5.48123	7.20457	4.23419	2.03914	3.48414	4.20006	2.89918	0.485427	0.0565835	3.41414	6.0398	4.03386	2.87381	5.25965	6.27426	6.16551	4.08491	0.0426443	0.903038	0.0565835	3.99458	6.52105	3.64847	0	7.24859	3.14568	0.713696	4.81916	4.03914	2.44626	2.49057	6.07575	4.17473	3.1811	4.91552	0.454176	0.0426443	7.51009	1.02148	6.28522	2.25701	7.41388
ACH-001559	4.27501	0	7.37972	2	4.25172	0	3.30012	6.00675	3.59335	4.27426	2.86987	4.69655	5.41886	0.83996	1.90304	0.0565835	4.2854	5.4851	4.5509	2.43829	5.13545	7.20398	6.51365	0	0	0.0426443	1.25096	4.04963	7.51932	3.904	0.0976108	6.57365	0.748461	0.263034	1.61824	2.71149	3.69599	1.8953	5.20984	5.17193	3.58856	5.57864	0.903038	0.83996	6.80168	2.774	6.54659	3.45418	7.66256
ACH-000344	4.85449	0	6.06437	2.08406	3.53978	0.0143553	7.45269	6.94732	4.52607	4.07039	1.71809	4.1811	5.95	0.344828	3.53978	0.0143553	4.8846	5.11395	5.59365	3.36317	5.42324	5.3302	7.97894	0.137504	0	0.0426443	1.59932	5.07895	7.74039	3.52482	0.15056	6.03738	5.06178	3.85599	0.739848	3.8748	3.63807	0.0703893	4.75649	6.67115	4.08321	5.86146	0.526069	5.96463	6.29701	1.53107	6.0054	4.80323	6.63169
ACH-000223	5.58496	0	7.06985	2.75061	4.65821	0.15056	0.0703893	5.77821	4.36667	3.93074	2.54597	4.53605	5.1235	3.22033	4.67582	0	4.08491	4.31832	4.47379	4.51916	6.4522	6.40327	7.03045	1.02857	0.411426	0	0.238787	4.23189	7.84222	3.98185	0.31034	7.27947	0.137504	2.39506	3.18428	5.29976	3.82883	2.9486	5.71205	3.07039	3.97269	6.33646	0.411426	0.0703893	7.36693	1.19535	6.59887	4.12928	7.77446
ACH-000031	4.7148	0.0285692	6.74591	2.7761	3.62176	0.0565835	3.09592	6.93605	4.97682	4.45154	2.02503	3.54967	4.71315	3.68257	4.63981	4.93263	4.51854	5.93286	4.8166	3.94017	5.72982	5.31506	8.31832	5.08406	3.59455	0.526069	0.124328	4.64962	6.79818	3.74846	0.757023	7.075	1.15704	3.94392	5.02945	3.0321	4.18587	2.58976	6.53807	5.64875	4.0027	7.40131	1.22651	2.96717	7.04308	2.35614	5.21529	3.53605	6.34501
ACH-000034	0.0840643	0	5.48704	1.61353	3.10098	2.73335	0.137504	0.333424	3.34483	3.77821	1.46989	3.54102	4.71973	0.0143553	2.26303	0.0143553	3.05485	0.124328	3.78764	3.25248	4.19771	5.28133	7.13556	0	1.82782	0.0565835	0	5.63778	5.31433	3.62761	0.0565835	6.92089	0.163499	0	3.42761	1.0635	2.98185	2.44095	4.18824	0.176323	3.43029	6.18567	0.669027	2.11437	5.98048	0.356144	4.81558	7.54311	8.05821
ACH-001861	6.37764	0.0426443	7.12257	1.95606	3.62877	0.0426443	0.807355	6.50032	7.83105	4.19849	2.84599	3.69822	5.44659	3.9241	0.910733	0.687061	5.09212	6.5601	5.01078	2.12433	5.93239	6.26547	7.62834	0.903038	1.95977	0.189034	1.75275	4.00809	6.80142	4.50906	1.77821	6.98698	3.74093	1.05658	4.4822	5.16672	3.47249	2.5509	5.96301	4.81096	4.848	3.74093	0.85599	0.555816	8.19061	2.81558	6.51412	3.22342	7.65313
ACH-000772	0.464668	0	6.77637	2.33628	3.45681	0.163499	3.56194	2.45943	4.25776	4.74792	0.545968	2.41684	5.46728	3.99186	6.09128	0.226509	4.19771	5.16148	5.05268	3.92505	5.70155	6.23974	9.93567	0.62293	0.0840643	0	0	4.74308	6.98914	3.98185	0.189034	6.78829	0.0840643	0.378512	3.43962	4.45812	4.31542	0.0703893	4.69042	0.713696	4.49953	8.28212	0.641546	0.0840643	7.74873	3.12102	6.29002	7.17363	7.03507
ACH-000946	4.88996	0	5.88338	2.06695	3.91456	0.0426443	0.226509	6.83857	6.08321	4.02768	3.61706	4.40531	5.39883	3.28688	1.23266	0.0285692	4.25096	4.71809	4.55827	4.2854	5.53294	5.99548	8.30049	2.46205	0	0.15056	2.55827	3.94392	7.08937	4.09339	0.0426443	7.01837	1.60407	2.26604	4.2502	5.77004	3.89336	0.516015	4.75489	0.695994	4.47054	6.37504	0.863938	0.0565835	7.224	0.263034	6.14262	4.5735	8.02176
ACH-000596	3.88069	0	5.25739	2.48543	3.35614	0.0143553	4.05224	4.76607	5.03518	4.74739	2.59694	4.38336	4.97269	0.895303	1.54597	0.0976108	4.46009	5.56499	4.91695	4.10601	5.31397	5.40905	7.55397	2.45418	2.854	0.250962	0.263034	3.86493	5.99232	3.7866	0.286881	7.04341	0.367371	0.799087	5.2589	4.1416	2.77821	2.73769	5.48091	4.17153	3.07382	6.6094	0.356144	0.15056	7.67476	1.83996	5.63633	4.41414	7.50462
ACH-000632	4.57531	0	6.69822	2.31325	3.86888	0	0.201634	5.93546	5.05702	4.66732	3.20789	4.92125	5.91145	1.81147	1.23879	0.0143553	3.8339	5.45976	4.17073	2.33914	5.53636	6.7252	7.85792	0.226509	0.137504	0.226509	0.847997	4.01525	6.19908	4.53294	0.124328	7.22747	2.27501	1.13093	0.378512	4.33271	4.12019	1.67807	4.57713	3.86987	3.9364	6.38301	0.475085	2.06005	6.94169	2.47249	6.53434	4.45286	8.05572
ACH-000978	5.00225	0.0426443	6.52372	2.61353	3.24336	0.0143553	0.0703893	5.37226	4.59932	4.40259	2.46728	3.82782	5.58826	3.12763	1.13093	0.0565835	4.0018	4.69153	4.90159	3.99729	6.1375	6.16108	7.14343	0.0840643	0.226509	0.163499	0.0143553	3.6311	6.57319	3.97361	3.0018	7.62804	3.26754	2	2.69599	5.05875	4.49121	0.713696	4.1235	0.495695	4.36107	6.84574	2.39506	1.32193	7.72472	4.45022	6.66647	6.00921	7.49657
ACH-000332	5.64933	0	6.67483	3.08576	3.79077	0.226509	3.87873	6.16752	5.10182	6.20359	2.8339	3.8748	5.27575	3.76765	1.59455	0.0426443	5	6.07767	5.11603	2.64155	6.66519	6.39541	7.92089	2.09085	5.07039	0.286881	0.0426443	4.4957	8.17896	4.30961	4.8674	6.03958	0.367371	0.333424	4.8495	4.98823	3.45418	2.26003	5.29682	4.64847	3.68482	5.99095	0.526069	0.895303	7.61772	2.3505	5.90689	5.80245	7.02945
ACH-001841	4.8166	0	7.20036	2.24184	3.81967	0.250962	3.27947	5.38716	5.20945	4.26454	2.11103	3.91169	4.25701	0.9855	2.28392	2.91456	3.65878	4.99955	4.2555	2.83996	5.33307	6.80336	5.35332	1.95233	2.41954	0.505891	0.15056	3.16189	5.88923	4.45483	1.58496	7.00439	1.36177	0.641546	4.69599	2.16672	3.24945	2.4957	6.63416	3.33628	3.72137	4.82069	0.344828	1.96347	6.55888	1.76977	6.16229	2.60644	7.57259
ACH-000179	5.35297	0	6.6241	3.42895	5.03342	0.0703893	0.176323	3.4957	4.57107	5.74658	3.38543	4.67186	5.8622	3.45286	1.92979	0.0976108	4.80581	5.63401	5.62322	3.95699	7.05593	5.38543	0.62293	2.42223	0.238787	0.238787	0	4.22882	6.24222	4.79546	4.22188	6.26115	2.9855	0.214125	6.61618	5.74093	4.66789	0.214125	5.08534	0.333424	4.51412	6.79533	3.44095	0.555816	8.41041	5.33378	6.52058	3.98185	7.28012
ACH-000887	5.50176	0	6.85	1.63691	4.3978	0	0.0840643	6.66221	4.21023	3.98823	1.926	4.29352	5.21723	3.03386	1.33914	0.0565835	4.06091	5.94087	4.52105	4.23113	5.40939	4.97223	6.94334	1.20163	0.124328	0.137504	0.275007	4.3978	6.5741	3.35191	0.0703893	7.58496	0.137504	3.43829	3.48414	4.20555	3.45812	1.5008	3.58256	4.38681	3.94767	5.49474	0.485427	1.58496	6.4801	0.226509	5.48382	5.04133	7.33923
ACH-000368	4.31034	0	5.81198	2.04264	3.93829	0.176323	4.13258	7.15168	4.22497	4.30232	3.98277	5.08321	5.4957	0.189034	3.15866	0.275007	5.2724	5.7703	5.35014	2.87184	6.10706	5.854	9.04783	0.0840643	0.0703893	0.757023	3.17313	5.26529	7.57137	4.57713	0.0840643	6.76022	2.7137	1.93357	1.31615	3.10769	4.50462	0.176323	4.51033	4.55213	3.18269	6.86765	0.782409	0.0703893	8.32692	4.03562	6.40803	7.09729	7.7736
ACH-000240	4.04177	0	6.03672	2.24793	2.93168	0.0840643	5.81224	6.73417	3.83895	3.88069	3.07211	5.44989	4.58256	0.757023	5.34234	0.238787	4.80374	5.0036	4.67469	2.89336	6.18923	5.93097	9.99534	0.238787	0	0.575312	0.124328	4.27352	8.18473	3.8953	0.263034	6.25531	3.49442	1.5509	0.378512	1.57046	4.22188	1.40054	5.22265	6.3565	3.18587	6.26209	0.641546	0.15056	7.14343	2.73985	6.07767	7.11676	6.85225
ACH-000578	4.96394	0	6.62498	2.23266	3.926	0.0565835	3.54226	5.38647	4.62994	4.81198	3.0036	4.49121	5.05485	2.54597	1.27501	0.333424	5.27202	5.87725	5.43863	4.13175	5.9465	5.82094	6.56864	3.69042	2.82375	0.695994	0.687061	4.21335	8.06674	4.22265	0.250962	6.82184	1.04963	3.5509	5.11811	3.9644	4.84147	2.53107	6.64775	5.82757	3.83289	6.69098	0.356144	0.641546	7.75188	2.55336	6.86009	4.9644	7.20065
ACH-001611	6.66477	0	6.78921	1.62293	3.19377	0.0565835	1.91073	6.55428	3.70377	4.17552	1.69153	3.83693	5.49378	0	1.92979	0	4.27352	5.49057	4.51728	2.39232	7.18824	6.3427	7.29333	0.321928	0	0.0565835	0.263034	5.94158	7.33896	4.1643	0	7.01436	0.15056	3.22959	0.0840643	0.263034	4.24641	1.50589	4.95559	6.40327	4.55582	5.33056	0.238787	0.0143553	6.53029	3.89821	6.63938	6.45976	7.28235
ACH-000135	3.0635	0	5.88118	2.30451	2.27501	0.0285692	4.76341	5.98891	3.51602	3.71589	2.96901	5.45713	4.44162	1.32193	2.55827	0.0565835	4.9331	5.27687	4.48156	3.20945	5.9743	5.60288	9.81182	0.0143553	0	0.0976108	0.111031	4.13093	8.77982	4.36036	0.0840643	6.28059	0.62293	1.88753	0.422233	2.76341	4.7021	1.13093	5.23534	6.97154	3.39094	6.53154	1	1.18903	7.08842	3.07211	5.91719	7.97527	6.97005
ACH-000406	0.0426443	0	6.20653	2.34199	4.31759	3.94579	0.0703893	5.69349	4.94953	5.478	1.35614	3.29278	6.50621	0.0285692	1.1635	0.0285692	3.58135	5.39438	5.16631	3.26003	4.48607	5.9191	8.1879	0	3.1127	0	0.201634	7.8453	6.09424	3.26903	0.378512	6.9629	0.815575	0.0143553	4.52356	2.1177	2.91073	2	3.73769	0.0565835	4.37226	7.11614	0.62293	0.0285692	6.91779	1.17632	5.93899	7.54365	9.44593
ACH-001541	0.687061	0	6.85212	2.47508	3.849	3.47508	0.0143553	5.10811	3.97269	4.15299	2.85798	3.95327	5.03694	3.31179	0.111031	0.0840643	4.07296	5.26266	5.08151	1.57046	5.97062	6.30852	2.73552	0.0143553	0.286881	0.0565835	2.10434	1.91839	4.80684	4.76075	0	4.52669	0.0143553	0.0143553	2.70929	0.250962	3.22188	1.89918	5.77821	0.0285692	3.28688	4.47573	0.367371	0	7.43146	1.56071	6.3572	0.0285692	7.51909
ACH-000998	5.2075	0.400538	5.47541	2.15381	3.07895	0.163499	0.15056	5.28059	5.57228	4.39232	1.16993	4.91504	5.50208	2.83996	2.09761	3.01257	3.67016	6.55013	4.12102	2.88166	5.8107	6.34056	7.88197	1.77821	4.0917	0.0426443	1.61353	4.06264	7.42291	4.24793	4.18666	6.03584	0.0703893	2.23266	4.78293	5.57864	3.83188	3.11437	3.93263	0.748461	3.10936	5.30488	0.201634	0.189034	7.84656	4.97774	6.43946	2.0072	7.92041
ACH-000441	4.04876	0	6.62702	2.65535	3.60051	0.0143553	0.226509	5.3875	5.3345	5.22805	3.08576	4.34341	5.96878	0.0426443	0.443607	0.214125	4.65363	6.76765	5.35544	2.75489	5.60437	5.87603	8.31655	0.137504	1.18903	0.124328	0	5.41109	5.87725	4.87184	0.189034	7.05376	2.15381	0.15056	3.57894	6.15137	4.47832	2.18903	5.2791	3.15056	4.01614	5.93805	0.678072	2.51096	7.44501	2.37016	6.30925	4.25475	7.9194
ACH-000960	0.111031	0	6.22997	2.39506	4.39163	0	0.0285692	0.31034	3.5509	5.45615	1.83592	2.83794	6.33503	2.75489	1.60407	0.0285692	3.86295	4.90641	5.29682	4.26153	5.68846	6.88007	7.08714	0.378512	0.0565835	0.0565835	0.0285692	4.99277	5.69237	3.92505	0	6.68201	1.8679	0.0703893	0.713696	1.76977	3.43296	3.02148	3.22033	1.10434	4.47249	6.47281	0.641546	0.0143553	7.64465	1.848	6.46156	5.65764	8.43121
ACH-000098	4.21101	0	6.68356	1.76129	3.74524	0.0703893	0.163499	5.26115	5.36772	4.12928	3.67807	3.90014	5.95024	2.43029	1.15056	0.0565835	5.24336	6.8334	4.86839	3.37851	6.87517	6.70556	8.02652	0.0426443	0.0840643	0.201634	3.30305	6.46238	7.22583	4.24031	0.286881	7.77597	0.464668	1.31034	1.27501	2.62059	4.10852	0.516015	5.13504	6.26959	3.50462	6.76155	0.863938	2.34199	7.28753	3.04789	6.56301	3.41007	8.02569
ACH-001651	4.86146	0	6.76633	1.70487	2.88753	0.0285692	2.3505	6.17572	3.60763	3.85499	1.9486	1.95977	5.4822	0.333424	5.04571	0.0143553	3.45943	5.09381	4.04002	2.18903	5.41177	4.03562	6.6359	0.0565835	0.0143553	0	0.847997	4.13258	6.21023	2.93168	0.0426443	6.42811	3.52231	2.82782	1.74416	2.85599	2.10434	1.26903	3.32193	0.214125	2.97269	4.337	0.545968	3.25248	7.87357	1.27501	5.92267	4.3875	7.94527
ACH-001456	3.78031	0.895303	6.29627	1.87578	2.72683	0	0.0976108	5.70681	4.25475	2.87971	1.51602	2.30451	4.9472	2.47508	2.25096	1.89918	2.88753	4.9607	3.75596	1.68706	3.2555	4.8515	5.97246	1.1375	3.8885	0.0143553	0.163499	2.13422	5.62819	2.3978	4.12516	6.12495	0.0285692	0.0143553	3.84499	3.33199	2.18587	1.26903	3.04264	1.88362	3.48285	4.37434	0.111031	0.15056	7.45656	1.73552	5.36772	1.64155	6.6476
ACH-001336	4.62352	0	6.96463	1.10434	3.33914	0.0703893	2.95977	5.31288	3.5435	2.94673	2.87774	3.83996	4.53916	0.0143553	2.57531	0.0565835	3.83086	5.14975	4.15056	2.44626	5.02591	3.74739	5.59216	1.33342	0.0143553	0.263034	1.848	3.31034	6.03254	3.31615	0	5.80632	1.4957	1.73118	0.31034	2.80529	3.13586	1.13093	4.21878	1.0635	3.54967	4.21878	0.687061	0.790772	7.33459	0.333424	5.26866	2.36737	6.39985
ACH-000284	3.75916	0	5.78999	2.0321	3.20006	0	5.14893	6.62425	3.93452	4.08321	3.44758	6.47816	4.87529	1.49057	2.72901	0.344828	4.38612	5.27389	4.5741	3.1375	6.23362	6.19554	9.98399	0.0143553	0.0426443	2.98185	1.98185	4.42626	7.9431	4.01703	0.176323	6.55919	1.35614	0.505891	0.0285692	3.11603	4.62877	1.22651	5.12433	6.36282	3.46989	6.45697	0.613532	1.81967	6.91361	2.40599	6.34643	5.15987	7.18041
ACH-000971	4.765	0	6.76354	2.68257	4.59694	0	0.0565835	6.01011	5.92837	4.80219	2.70266	2.62059	5.78738	3.4489	3.0054	0.298658	4.47054	6.22477	4.68986	4.05137	5.25361	6.41886	5.478	3.904	0.111031	5.77505	1.72247	3.97636	6.75435	4.61294	0.226509	6.69627	2.50843	3.40735	2.81147	5.34447	4.03738	0.871844	4.59813	3.70044	3.96162	6.08937	0.765535	3.32912	7.47306	0.526069	6.30561	4.58916	7.85649
ACH-001454	6.14119	0	5.75836	2.82782	3.22651	0.0426443	6.8392	5.98482	4.37573	3.72356	2.67356	4.07382	4.39232	3.46336	2.10098	0.238787	3.89142	6.06221	4.43429	3.4019	4.93734	4.78764	7.93776	3.84398	2.08406	0.238787	0	3.3799	7.40054	4.16591	3.02503	7.31596	2.87381	0.604071	4.89482	3.75809	2.94111	2.56316	6.25626	4.62469	3.15218	5.53636	0.650765	0.189034	8.262	1.99639	6.38076	3.25096	7.08332
ACH-000926	6.42509	0.250962	6.35808	2.91839	3.37712	0	0.0703893	5.6761	5.65964	3.30889	1.95233	3.54102	4.76977	2.45418	3.75382	2.87971	4.04876	6.13832	4.73064	2.96162	4.94298	5.0197	7.60947	1.25096	4.91504	0.201634	0.0976108	3.44493	6.55796	3.60526	5.34163	6.43296	0.432959	0.0285692	5.1416	2.0321	3.12267	1.75275	5.18388	1.20789	3.82985	5.75034	0.238787	0.0143553	7.64825	1.94486	6.1373	3.19061	7.18676
ACH-000033	5.39197	0	6.86666	1.80323	3.84197	0.0285692	0.807355	6.15137	4.8268	4.58316	3.45154	4.95187	4.51728	4.65363	2.08406	0.0143553	3.94111	5.0993	4.99458	3.63343	6.45171	5.28836	7.20114	0.286881	0	0.0565835	0.0426443	4.25475	6.99084	5.39883	0	6.5452	2.69153	1.13093	6.89651	2.78241	3.40463	0.0285692	4.43363	0.124328	3.60526	6.91612	0.344828	0.85599	7.62979	1.48027	5.81224	5.1639	8.40914
ACH-000576	0.0426443	0	6.09803	2.22033	4.27277	2.26003	1.09761	0.163499	4.07553	4.06609	2.25096	3.2765	5.03782	1.24489	0	0.0285692	3.49313	4.26379	3.9241	2.25399	5.27165	6.5947	3.63343	0	0.0426443	0.0703893	0.137504	3.72901	4.48349	3.25852	0	6.88777	0.0426443	0.0143553	3.10434	0.464668	2.86987	3.23113	6.17911	0.389567	3.22651	5.69181	0.575312	2.40871	5.94064	2.58015	5.59872	0.15056	7.20349
ACH-000019	3.05658	0	7.35491	2.55827	3.17313	0.0143553	0.0426443	6.64212	5.02148	4.48414	1.46467	2.68032	5.24603	2.26003	4.49249	0.0143553	4.51286	5.87504	4.72028	3.15218	5.92196	5.64847	7.09476	0.0143553	0.659925	0.0426443	0	4.26828	5.51507	4.94767	0	5.99095	1.11103	1.14405	4.67073	5.76155	3.68818	0.263034	4.57531	6.89373	3.41549	5.63952	1.04264	7.09751	7.82483	2.81558	6.23151	6.16712	7.43196
ACH-001577	0.575312	0	4.84599	1.87184	2.68482	3.17632	2.37573	5.07553	4.13093	4.1127	1.31615	3.04614	3.46989	0.443607	0.111031	0	1.89142	4.15381	3.06695	1.94486	4.81916	4.83946	7.03903	0.0285692	0.286881	0	0	3.64731	5.80864	3.59096	0	6.51759	1.66903	0	3.68594	0.163499	5.56834	2.41684	4.03738	4.5601	2.75702	6.31143	0.367371	0	6.10434	0.0703893	4.60763	6.84699	6.81263
ACH-000330	4.16189	0.0285692	6.86962	2.55336	3.8166	0.495695	0.0426443	6.14323	4.49378	4.72846	2.22342	4.02768	5.71342	2.09085	6.18943	0.0840643	3.88362	4.66789	4.26978	4.23189	5.6565	4.55582	4.20633	0	0.0565835	0.0285692	0	3.83491	7.11998	2.82985	1.40054	6.17133	0.344828	2.56071	4.8334	5.05137	3.32337	0.124328	3.19849	0.713696	3.13093	6.89954	0.226509	0.0143553	6.88093	2.80323	6.74927	6.10685	7.27081
ACH-000848	6.27761	0	6.13668	2.59932	4.20867	0.0285692	1.3505	8.19992	5.32876	4.72846	2.02857	2.93357	6.0072	2.67356	3.35614	1.90304	4.33842	5.7703	5.04789	3.69599	5.08279	5.47476	7.78758	0.286881	0.124328	0.15056	0.0143553	4.24869	7.47306	4.32697	1.12433	6.26735	2.83188	4.26228	2.90111	3.20477	3.774	2.37851	4.14486	5.41718	3.76022	5.69432	0.604071	4.99594	7.48679	2.1635	6.56026	6.22188	8.04434
ACH-000481	5.24489	0.0285692	6.6532	2.5509	4.50653	0.0565835	4.50589	6.49586	6.72383	4.34056	2.17951	4.79649	6.06134	2.76129	4.00809	0.201634	4.20006	6.02746	5.19692	3.35614	5.30268	6.36036	6.23458	1.46467	0.0426443	0.0976108	2.68482	4.21645	6.91803	3.31759	0.62293	6.5306	2.40054	0.137504	5.15906	4.6017	3.61353	1.95233	4.06005	3.02326	4.11187	5.74551	0.887525	2.77821	8.05945	2.10098	6.86295	2.04614	7.20075
ACH-001517	4.06523	0	5.60703	1.22651	3.05137	0	0.214125	5.28059	4.18269	3.03386	1.99639	1.4489	5.01033	2.14078	3.07724	0	3.04089	4.53667	4.33342	3.23879	4.55582	2.60881	5.73931	0	0.0143553	0.137504	1.66448	6.0343	7.07339	3.36036	0	6.77083	0.0285692	2.38957	2.84599	3.61117	2.89336	0.111031	4.0321	3.9991	4.37643	5.14364	0.545968	0.933573	7.56925	0.400538	6.36054	4.1334	7.80774
ACH-000338	0.176323	0	6.08279	4.49889	4.75221	0.0565835	4.31976	5.35614	4.81916	4.94205	4.11103	3.72137	5.50621	2.68257	0.545968	0.0976108	4.68257	5.65592	5.12928	4.2032	5.65707	5.29094	8.48539	0.0285692	0.485427	0.0976108	0.321928	5.4822	6.35826	4.60881	0.0840643	6.62029	0.0285692	3.33056	6.75556	0.641546	4.07639	2.24793	6.36859	3.55459	4.97315	7.24574	6.93404	0.0426443	7.38033	2.16672	6.29866	1.15056	7.14456
ACH-001959	3.32193	0	7.35729	1.69153	4.32841	0	0.0426443	4.70044	3.38128	4.37712	2.36737	2.16672	5.84248	0	2.13422	0	3.65992	5.2407	4.39917	2.25399	5.18587	6.17253	7.65835	0	0	7.40318	0	3.80116	6.03144	5.44593	0	6.5735	0	0.0426443	3.07382	4.37016	5.19771	0	4.42895	7.79565	4.0054	5.12557	1.02148	0.0703893	7.90641	3.1375	6.69585	2.69377	7.00394
ACH-001414	3.89142	0.0143553	6.03298	2.48285	2.24793	0.443607	6.20261	4.53045	3.81455	4.5741	2.01436	3.67469	2.83188	0.992768	3.23419	0.0565835	4.24184	5.48929	4.67243	3.15218	4.67976	3.79181	5.81916	1.08406	0.0976108	1.0635	1.25096	4.22342	4.20867	4.1102	0	6.98493	0.815575	2.09085	1.58496	0.823749	3.75061	0.659925	3.65191	5.56041	2.88557	5.25965	1.15056	3.41954	7.06393	0.536053	5.40531	1.95977	7.15066
ACH-000871	5.32517	0	5.9982	2.64616	4.46532	0.163499	0.111031	1.3505	6.4663	6.1058	3.39643	4.26828	5.01078	4.65134	4.28318	0.879706	4.26153	4.78398	4.97545	4.22574	6.0505	5.36142	5.99887	2.91265	5.00764	1.50589	0	6.55428	5.55796	4.82985	3.65421	6.44807	1.4957	4.32625	5.90977	4.19771	4.77873	0.238787	4.55152	0.963474	3.88362	6.29425	3.69488	3.49313	7.46393	5.3733	6.1152	6.6014	7.93687
ACH-001403	5.69293	0	7.51144	2.73769	3.51475	0.0976108	5.14445	5.05094	3.27947	3.87578	3.04264	4.26078	4.83794	2.01436	4.64155	0.250962	4.21179	4.61824	4.16993	2.68032	6.58752	5.27687	6.33468	0	0.0426443	0.0426443	0.0565835	4.37504	6.47427	4.34696	0.454176	6.27557	2.40871	1.83188	1.56071	2.82579	3.72247	3.07211	3.5656	3.30305	4.97177	5.62994	1.22033	1.29866	7.93021	3.86691	6.16812	7.53947	7.90448
ACH-000805	3.78555	0	6.43313	3.12267	4.23266	0.0285692	0.263034	6.42375	4.36737	4.43696	2.99277	4.32121	5.36527	0.298658	0.555816	0.286881	4.25626	6.07852	5.65019	3.61824	5.3194	6.19554	6.9782	0.941106	0.0703893	0.31034	0	6.34891	5.51286	4.05398	0.137504	7.47005	2.88166	0.713696	2.18269	4.10685	5.22342	1.37295	3.77926	2.17951	3.904	6.04745	0.978196	3.84398	7.84342	3.34483	6.13545	5.52199	8.41815
ACH-001142	4.68032	0	6.04963	2.64155	3.41414	0.0426443	6.65019	6.56986	4.35826	4.26153	3.50462	5.24907	5.10643	1.20163	4.59634	0.226509	4.74792	5.53761	4.48671	3.59335	6.07082	7.13494	10.256	0.0285692	0.0285692	1.80323	2.10098	4.95884	7.57478	4.42828	0.0285692	6.44128	0.356144	0.111031	0.678072	3.41549	4.40122	0.0426443	5.87774	5.70432	3.90497	6.98368	0.871844	3.39917	7.02481	2.28688	6.30925	6.43379	7.35368
ACH-001554	5.0072	0	6.40242	2.56071	4.03826	0	0.464668	5.28021	5.22265	4.51159	2.62994	3.19535	4.17951	0.0976108	0.443607	0.0840643	4.3978	6.90509	5.00585	2.49313	3.65191	5.62147	7.40199	0.0143553	0.0143553	0	0	4.30451	5.12433	3.48285	0.0565835	7.07703	2.34483	0.748461	2.3505	4.06178	3.91839	0.321928	4.10182	4.03474	3.57894	5.62644	1.38957	4.59574	5.64962	2.27501	6.08619	4.15218	7.22033
ACH-000847	4.41278	0.0703893	6.24546	2.5656	4.30378	0.0285692	0.0976108	5.31832	4.46205	4.57168	0.0143553	1.5008	6.15684	1.27501	4.34056	0.847997	3.51223	4.32984	4.55275	3.72247	5.37678	5.45286	6.21897	0	0.0565835	0.0143553	0.0143553	4.18903	5.8632	3.85997	0.0703893	6.19338	3.96717	0.31034	1.25701	4.48414	3.01614	1.19535	2.20789	2.64847	4.29205	5.96093	0.286881	4.89336	6.61309	3.09424	6.51869	5.15218	7.10915
ACH-001207	4.59753	0	6.21704	2.21101	3.31034	0	4.9397	5.90665	4.12846	4.58796	2.65992	4.51791	4.86888	0.0143553	5.17073	0.83996	4.17073	4.37573	4.53481	3.87086	6.06738	5.54782	9.68741	0.0840643	0	0.31034	1.20789	4.20085	7.91415	3.83086	0	6.13093	3.78241	0.0143553	0.0565835	2.63691	4.15462	0.0143553	4.42559	5.33235	3.78031	6.85137	0.731183	3.0635	7.41193	2.79286	6.11437	5.52388	7.1014
ACH-000832	4.36107	0	6.44626	2.52607	4.10601	0.250962	4.87725	5.75328	5.24755	3.91456	2.07724	4.58676	4.83188	0.0976108	3.48929	0.238787	4.15947	6.15644	4.53294	2.97269	6.12143	7.00203	5.84373	2.12102	0.432959	0.475085	0.650765	4.5552	7.00484	3.89627	0.111031	6.69752	3.56438	0.895303	0.485427	1.24489	3.32912	3.80116	5.75328	1.46467	3.61589	5.02459	0.378512	0.176323	7.01547	0.333424	5.42861	2.25399	7.41633
ACH-000428	4.39985	0	6.71108	2.04264	3.16993	0.0703893	1.58976	6.57546	3.99639	3.58496	2.0036	3.12102	4.78241	2.87774	2.96347	1.1177	4.87234	6.2485	4.8485	3.47379	5.82985	5.74739	6.98436	0.250962	0.0565835	0.0703893	2.9982	4.19928	7.38922	4.0917	0.0840643	7.20682	3.47508	0.263034	4.23726	4.84298	4.3427	2.5435	6.19397	6.23573	3.41954	6.1014	0.83996	3.9607	7.60748	2.61117	6.13709	4.774	7.19564
ACH-001382	4.61589	0.378512	6.89458	2.22033	3.488	0.0143553	5.38681	5.01078	6.73971	3.10266	2.74846	4.30961	4.55827	0.895303	5.0321	0.495695	3.53605	4.44427	3.96809	2.59216	6.04243	6.03254	6.17193	3.02326	3.80426	0.0703893	1.14405	3.81967	7.32391	3.84197	2.72028	6.75676	0.356144	2.14731	3.9607	1.5509	2.72901	2.57773	5.28355	7.11353	3.46728	5.13463	0.536053	1.17632	7.04319	1.70487	5.72846	3.76022	6.65835
ACH-001302	5.21645	0	6.58556	2.4489	3.45286	0	0.0285692	2.30159	4.25323	4.67976	1.35614	2.12433	5.35861	3.08916	2.03562	0	3.86394	6.20906	4.8885	3.04089	4.9364	5.42257	5.0072	0.0143553	0.238787	0.0285692	2.17313	3.47119	4.83744	4.57713	0.516015	6.09212	6.42777	0.137504	8.37143	4.0268	3.34767	0.286881	0.214125	0	4.04701	6.16491	3.14241	2.76341	7.81109	4.59932	6.37086	3.51728	7.03221
ACH-000690	4.73769	0	6.49265	2.36737	4.48027	0	2.55336	5.82757	6.35579	4.1643	3.30012	4.55704	5.86666	0.632268	2.84398	0.432959	4.40599	5.26266	4.98641	3.38128	6.30451	5.14445	8.29577	0.678072	0.0840643	0.0840643	0.678072	4.15381	6.42206	4.20006	0	7.3014	3.81558	1.76553	0.895303	3.79286	3.41414	1.60407	3.52982	0.163499	3.99186	5.37816	0.15056	0.641546	7.89597	1.05658	6.73985	4.19298	7.54936
ACH-001134	0.0143553	0	5.1035	2.76765	1.78241	0.0840643	1.03562	3.23419	2.73552	2.19849	2.57531	2.81352	4.02768	2.75061	0.0565835	0.0143553	2.7137	4.07296	3.48671	1.5656	5.43663	3.6241	7.99373	0.0143553	0.0143553	0	0	6.84637	5.51128	4.41752	0	6.9384	0.0285692	0.0285692	0.124328	0.0143553	2.07724	0.748461	6.34323	1.58496	3.55704	3.4489	0.555816	0.0143553	5.94626	2.27501	5.80967	0.0976108	6.7028
ACH-000914	0.0976108	0	6.51916	2.77189	4.97682	5.3875	0.0703893	2.38128	4.92315	5.47021	2.67356	3.76235	6.14425	1.89142	0.356144	0	4.10098	6.192	5.10014	4.50335	5.56499	5.8824	5.51349	0	0	0.0976108	0	4.45088	6.22226	4.33771	0.137504	7.09445	0.0285692	0.0285692	0.879706	0.378512	3.44228	0.238787	5.12516	0.201634	3.52857	7.23237	0.545968	0.0143553	7.40446	3.6427	6.06674	0.963474	7.94848
ACH-000858	4.92029	0	6.26754	1.66903	2.83592	0.0426443	5.3427	5.95513	6.51033	2.55582	2.21723	3.90207	3.68818	1.1635	4.06091	0.0976108	4.29939	6.12226	5.01792	2.48285	5.21568	3.89433	4.85848	1.26303	0.176323	1.76553	0.516015	4.14241	5.87135	3.3505	0.226509	6.55781	1.75702	1.24489	3.43829	2.08066	2.38681	1.33342	3.16189	3.82171	2.72465	4.69432	0.356144	0.275007	5.84398	2.9486	5.78319	1.82782	6.82757
ACH-001421	4.66164	0	6.14608	1.41684	2.83592	0.0840643	0.0426443	3.94017	5.0648	4.72683	3.32481	3.71809	5.80787	3.82069	4.95047	0	2.9241	5.84046	4.75862	3.35191	5.2426	4.86938	6.28947	0.111031	0.978196	0.226509	0.0285692	3.93734	4.70543	4.63807	6.39575	5.46923	0	2.03562	2.78869	0	4.40395	0.298658	1.43296	0	4.41278	6.25285	3.40871	1.22651	7.3779	3.94486	5.61648	5.99548	7.86771
ACH-000544	2.91648	0	6.07788	1.35614	3.08406	0.0426443	2.91839	4.50716	4.72738	2.36737	2.78031	2.95047	4.35685	0.0976108	3.0072	0	3.03034	4.06091	3.70598	2.1635	5.08066	5.81532	5.8515	0.790772	0.333424	0.0565835	1.54102	4.3067	5.22535	3.03738	0.0703893	5.78372	2.71149	0.823749	0.887525	1.37851	2.15056	0.15056	2.44095	0.214125	2.5435	4.03386	0.189034	0.594549	5.63778	0.641546	4.99005	2.90497	6.78751
ACH-000725	3.64155	0	6.71699	3.65878	4.34483	0.0565835	0.286881	4.48349	5.30415	4.64155	2.59455	4.67129	4.67356	0.650765	5.05875	0.0143553	4.83238	6.15927	5.38957	2.90304	6.66463	5.46565	5.62176	0	0	0.0565835	0.0143553	4.52982	7.93899	3.65076	0.0976108	5.97865	1.23266	0.163499	6.97292	5.6851	3.30597	0.111031	4.64328	0.669027	3.88753	5.91265	0.176323	1.70929	8.732	2.31615	7.86987	4.64559	7.76938
ACH-000566	4.66391	0	6.81583	2.61589	3.46989	0.124328	4.24869	5.81429	3.853	4.74308	3.44361	4.58316	5.31397	2.21723	5.28651	0.0285692	5.29609	4.70543	5.35685	4.41143	6.13319	5.38024	7.46777	1.22651	0.137504	0	2.81967	3.56803	7.47484	4.18982	0.0426443	6.31723	3.06867	0.111031	3.02326	3.40054	4.52356	2.31034	6.08704	5.72055	4.2555	6.55397	0.594549	0.214125	7.94579	1.48027	6.16692	4.41819	7.6367
ACH-000760	2.09761	0	6.93404	2.1635	4.93216	0	3.24489	6.36229	3.98914	3.81865	2.68482	3.9486	5.2149	4.29057	0.0565835	0.555816	4.78136	5.91624	5.23381	3.42358	5.81378	6.43229	8.32107	0	0.0565835	0.0840643	1.16993	4.95093	7.18031	4.26529	2.46989	6.86666	3.68145	0.575312	0.0840643	3.96901	3.80735	0.137504	4.06178	3.5008	3.81865	6.64024	0.704872	1.08406	7.43137	1.5656	5.85748	5.91648	8.01028
ACH-001745	5.0648	0.0840643	7.34483	2.09085	3.70929	0	0.238787	2.53854	2.774	3.96809	0.925999	0.632268	5.16631	2.48285	3.94486	0	2.7866	4.79233	4.99186	3.22959	3.27798	5.17033	6.09424	0	0	0.0426443	0	4.46074	4.48993	3.8166	0.286881	5.86121	4.25172	1.46467	0.333424	4.51412	3.27947	0.0285692	1.12433	3.08576	3.926	5.20555	1.39506	3.25096	6.808	1.88362	5.6522	5.03298	7.71335
ACH-000787	4.53605	0	5.62673	2.45154	2.93168	0.0976108	3.07895	5.81429	7.34944	4.5601	3.06178	4.1127	5.8525	0.713696	1.90689	0.0976108	4.74255	4.95	4.68313	4.12433	5.48543	4.99458	7.46491	0.214125	0.0426443	0.0840643	3.11103	6.36265	6.97613	4.01614	0	6.4446	0.238787	0.956057	4.71039	4.11437	4.7366	1.8679	7.07264	4.45154	4.0009	7.39094	0.678072	3.79909	6.76527	1.74416	6.2502	5.19574	7.8999
ACH-000749	4.67356	0	6.07103	1.74416	3.95977	0.0285692	0.0976108	4.69265	4.56986	4.06867	2.7866	3.80219	6.56682	2.67582	1.36177	0.0426443	4.18666	6.05918	4.73118	2.32481	4.15866	5.9743	6.44559	1.44361	0.137504	0.516015	0.0976108	3.97085	4.13914	4.32625	0.815575	5.65507	4.04789	0.879706	3.67356	3.90689	3.35191	0.704872	3.28244	2.04264	4.22574	4.84449	1.20789	4.24717	7.55735	5.12019	6.55796	6.15178	8.22222
ACH-001328	5.17552	0	7.08502	2.25701	4.21568	0.0976108	3.28096	6.08789	5.4793	3.49442	3.41819	4.19613	4.86146	0	3.73985	0.0143553	3.51602	5.36036	4.0036	3.11936	5.1534	4.38267	5.57743	2.02148	4.73606	0.15056	0.0840643	3.28096	6.36335	3.90497	0.111031	6.49346	1.60881	2.4957	0.111031	1.5509	2.60881	1.60407	2.95606	2.53605	3.24793	4.53978	0.432959	0.0285692	6.71163	0.0565835	5.55428	1.16993	7.57395
ACH-001068	0	0	5.82909	2.29278	3.10266	0.0565835	0.0840643	4.43229	4.42425	3.01614	1.81147	2.93357	4.23419	1.85599	0	0	2.73552	3.35755	3.10769	2.40599	3.88947	5.04352	6.24926	0	0.0840643	0	0.0703893	3.45022	3.94111	2.42761	0	5.20594	0.0143553	0.0143553	2.74416	0	1.94111	0.443607	6.37764	0.0565835	3.65764	5.30998	0.15056	0	5.87086	2.08066	5.25475	0.0143553	6.59932
ACH-000358	5.6907	0	5.52701	2.58256	4.73227	0.137504	0.250962	6.05441	5.76951	4.86641	2.48027	4.22033	6.17293	4.64039	2.54102	0.137504	4.69265	5.86493	5.31687	4.19535	6.56117	4.38888	7.36492	0.963474	2.53107	3.98094	0.0143553	4.05832	4.86196	4.09677	7.35359	6.10266	4.904	0.15056	7.53138	5.54628	3.52982	0.124328	4.39232	1.74416	3.44758	6.16611	5.28466	4.28021	8.60077	4.26303	6.38319	5.30305	7.10318
ACH-001654	5.32265	0	7.22564	2.66448	4.47573	0.31034	5.61147	6.84436	5.20945	4.23266	3.01614	4.29499	4.61765	3.08576	6.71067	0.0143553	5.10978	5.62029	5.17433	2.82375	4.54164	5.03694	5.7046	1.75275	0.0426443	0.367371	0.847997	3.0268	7.52317	4.04264	0	6.68187	0.189034	3.6427	4.06523	3.23113	4.05398	2.61824	4.75221	6.89954	4.46532	5.18468	0.263034	0.189034	7.18923	1.64616	6.49153	7.16179	7.10129
ACH-001521	5.40054	0	7.76626	2.19535	5.0635	0.0143553	3.46858	4.39369	7.06534	4.21101	3.28392	4.04789	5.56742	0	3.33771	0.0143553	4.20398	5.3466	5.26379	3.11437	5.38474	5.23917	7.45664	1.04264	0.333424	0.565597	0.0143553	4.13832	6.51838	4.44758	0.0285692	7.00876	4.45154	4.34341	0.0703893	2.33914	3.17153	2.88166	3.52482	1.20789	3.34908	4.89772	0.555816	0.298658	8.63822	0.137504	6.86282	3.82579	7.82337
ACH-000209	4.63459	0	5.34802	2.13422	2.74846	0.0143553	4.86987	5.58225	5.26491	4.8525	2.09085	3.13258	4.55275	3.08236	3.07211	0.263034	3.90014	4.35826	4.0063	3.25701	4.63343	4.74255	6.37016	0.505891	0.111031	0.0143553	0.137504	4.29866	7.74906	3.41954	0.411426	6.36842	0.0565835	2.61589	4.60999	4.28466	4.20711	0.695994	4.99729	4.43095	3.41143	5.58346	0.356144	0.0285692	6.7896	0.722466	5.85499	5.81198	6.30579
ACH-001520	0	0	4.43763	2.01436	2.06695	6.82043	0	3.53481	2.29278	2.68706	0.0976108	1.24489	4.60644	1.04963	0.0143553	0	2.35332	3.23879	3.30159	2.03914	4.86245	4.43229	6.35421	0.201634	1.1375	0.214125	0	5.0993	3.89045	4.70044	0.432959	6.41515	0.400538	0.15056	1.25701	4.0993	1.36177	1.66448	5.07596	0.0143553	3.44361	5.77136	0.286881	0.0703893	6.09972	2.25096	4.79025	0	6.17133
ACH-000213	5.23917	0	6.86888	1.94111	2.88362	0.0426443	3.61235	6.03408	4.73877	3.22342	2.76341	4.75862	3.73118	2.49825	1.50589	0.0426443	4.84147	5.93522	4.92647	2.9486	6.18507	5.06953	6.31052	2.62059	2.54597	1.03562	0	3.88753	7.09223	3.94298	0.214125	6.42811	0.659925	0.422233	6.27519	2.80529	2.76129	2.55827	4.64847	5.15785	3.12267	5.95652	0.250962	0.0565835	7.44095	2.36457	5.58015	1.13093	7.33065
ACH-001610	4.98596	0	6.52309	3.0036	3.61706	0.0703893	0.250962	4.98914	4.64097	4.58376	0.0143553	3.25248	4.25626	3.38681	1.77821	0.0703893	4.80993	6.38836	5.29315	3.03386	6.50096	5.31397	8.44795	0	0.0426443	0.0285692	3.33056	4.48156	7.46972	4.2765	0.400538	7.05561	0.613532	3.21723	1.21412	1.09761	5.0197	1.36737	4.04876	4.98368	4.02326	6.06781	0.650765	0.454176	7.42903	3.75168	6.7021	6.2538	7.35473
ACH-001408	6.41244	0	7.32319	2.37295	3.7866	0.632268	5.44857	5.7658	4.81404	4.50779	2.94111	4.40871	4.26003	2.28688	5.03386	0.0565835	4.74039	5.95047	4.88947	2.54102	6.23074	5.20242	7.12412	3.02503	0.0703893	0.250962	0.356144	3.39232	7.4451	4.1235	0.0426443	6.81916	1.9855	1.46467	3.74953	2.48027	3.40463	2.42761	4.70321	3.50462	2.852	5.50494	2.37016	5.05268	7.87055	1.25701	5.46663	2.9982	6.75969
ACH-000991	4.15947	0	6.23151	3.59932	3.24489	0	0.263034	6.4019	6.40071	3.9514	3.23419	4.75649	4.67807	3.12267	4.49889	4.337	4.76394	7.03463	5.11145	4.30816	6.13278	6.00158	6.23419	3.03386	3.74308	0.124328	0.0565835	4.12681	6.85112	4.16591	0.0840643	6.88118	0.475085	0.378512	6.50016	3.94392	4.41886	3.28836	5.80038	0.464668	3.854	7.6268	0.367371	0.201634	7.20701	3.0321	6.34341	4.02945	7.86412
ACH-001412	7.41253	0	7.35306	2.22651	5.2765	0.124328	0.15056	7.53426	4.21568	4.92837	3.5741	3.0268	6.65148	2.16027	5.58225	0	4.50208	4.9644	5.25134	3.53107	6.86394	5.70016	7.65112	2.01078	0	0.0426443	0	3.74416	7.18527	4.07895	0	6.87541	2.61824	2.26003	3.60999	4.71644	3.9486	1.96347	3.97453	4.88606	3.25399	5.17991	0.356144	1.91839	8.22106	0.863938	6.12846	2.02503	8.00624
ACH-000331	3.40599	0	6.28003	1.848	3.76235	0.0840643	3.43162	5.6642	4.27202	4.1334	3.0635	4.50144	5.53325	3.17153	1.28688	0.0703893	4.54844	5.23993	5.19849	3.98641	6.40837	6.53947	8.50116	0.214125	0.0143553	0.0703893	3.25852	3.92029	7.86604	4.79442	0.321928	7.13996	0.163499	3.37851	3.18745	2.9855	4.50208	1.67356	6.03496	0.722466	3.57289	5.66078	1.73118	1.01436	7.07724	4.99594	7.09951	5.5656	7.70798
ACH-001407	5.26679	0	7.39172	1.75702	4.77716	0.0703893	1.60881	6.74712	4.68594	3.80219	3.0321	3.29425	5.3579	3.28836	0.807355	0.0143553	4.79286	5.44956	5.13545	2.73118	5.24565	5.85574	8.564	0	0	1.35614	2.7137	4.92505	7.52286	4.61176	0.0565835	7.22738	0	1.66903	0.495695	0.918386	3.32481	2.05658	4.76977	6.50764	3.45418	5.03474	0.739848	3.5435	7.94813	2.01436	6.14873	5.29902	7.86759
ACH-000580	3.19535	0	7.03716	2.24184	3.34199	0.432959	1.88753	6.33557	4.71973	4.09845	4.25475	5.72656	5.13299	0.0840643	0.678072	2.34483	5.37955	7.04264	5.56712	2.99277	6.224	6.39369	8.58594	0.411426	0.163499	0.0703893	0	7.27845	6.04985	4.33842	0.111031	6.67327	0.545968	3.07382	2.21101	5.41616	5.03738	0.963474	4.8885	2.43563	3.47768	6.70708	0.807355	0.575312	8.15861	2.75702	6.03474	5.61824	8.2717
ACH-000594	4.00809	0	6.26641	3.51096	5.25437	0.111031	0.0703893	4	5.74551	5.60259	4.95838	6.36702	5.41041	4.31687	2.33342	0.0285692	5.32193	6.01903	5.68762	4.01078	5.71507	4.78031	0.847997	2.7866	6.8993	1.04963	0.378512	5.9028	6.40259	4.5292	8.37795	6.65134	3.77716	3.61353	8.01106	5.28577	4.97728	0.124328	5.50875	0.356144	4.27575	6.04133	3.3147	2.41954	8.26669	4.83592	5.95047	7.70217	7.97103
ACH-000684	3.34625	0	6.8475	1.87184	3.95327	0.0143553	4.65878	7.00574	2.91839	3.63807	2.68257	4.07211	5.2817	1.52607	1.94486	0.0426443	3.61235	4.05398	3.89627	1.926	5.88435	5.51223	6.89239	0.0285692	0.0285692	0.0976108	2.31034	3.51854	6.06134	4.1334	0.0565835	7.27575	0.948601	0.298658	1.48543	0.400538	3.50589	1.87578	6.14098	5.40293	3.37573	3.90014	1.09761	0.389567	7.27733	0.111031	5.54102	2.15381	7.12774
ACH-000742	3.72247	0	6.02967	2.19219	2.53356	0.15056	5.93381	6.97338	5.19219	3.25852	3.42895	7.02735	4.32912	1.29278	4.40259	0.238787	4.4522	4.72465	4.78031	2.9222	6.35738	5.87897	9.67165	0.0143553	0.111031	3.58135	1.5656	4.01167	7.94843	4.29572	0.250962	6.0781	3.69711	0.0426443	0.250962	3.62761	4.09677	0.815575	5.47476	5.6893	3.38405	5.23688	0.790772	0.111031	6.87946	2.10098	6.5256	5.4941	7.19781
ACH-000868	6.34802	0.0143553	5.71067	1.95233	3.90111	0.0285692	0.356144	5.32912	5.80452	3.90881	1.93357	4.29057	4.74578	0.678072	4.99774	0.124328	4.49378	6.0663	4.25626	3.01257	6.40582	5.27798	6.75822	0.641546	0.0703893	0.0285692	0.201634	4.43829	7.15765	4.1102	0.0565835	7.00023	1.28096	0.15056	4.00988	4.98778	3.20477	2.62527	5.40735	6.01346	4.0018	5.08789	0.137504	2.27798	7.55566	1.16993	5.5659	7.85474	9.83246
ACH-000732	4.08746	0	5.337	1.36737	3.02857	0.0840643	3.55582	5.79805	3.18903	3.19061	2.34767	4.26828	4.10434	0.0143553	3.06695	0.0703893	3.48543	4.52231	3.77189	2.35896	5.76898	5.99435	6.78581	2.3978	0.0285692	0.263034	0.464668	4.24717	6.15684	2.81352	0.0976108	5.72629	1.13093	1.18269	0.176323	1.85599	3.43696	1.64155	4.60466	0.695994	2.65764	3.37851	0.124328	0.124328	7.18824	0.176323	5.21645	1.10434	6.67101
ACH-000429	3.83794	0	5.8107	1.74416	2.51602	0.0703893	4.52732	4.10266	3.33914	2.69822	1.42223	2.25701	3.05658	2.6893	0.604071	0.400538	4.11853	3.34483	4.66448	4.02326	7.06426	4.58796	5.73227	0.85599	0.0285692	0.0285692	0.0426443	2.0072	4.99548	3.44095	0.124328	6.14057	1.16993	2.53356	1.60407	1.76129	3.10266	2.37295	5.87848	5.88411	3.71809	5.18587	1.07724	0.344828	7.51365	0.85599	5.62761	3.09255	7.56476
ACH-000310	4.80787	1.07724	5.8339	2.59932	3.69265	0	0.0565835	0.226509	5.36036	6.0177	0.111031	0.659925	5.9486	0.0143553	1.16993	0.0143553	3.80219	5.84549	4.65249	3.7137	4.87971	5.30597	6.52278	0.0285692	0.214125	0.0426443	0.214125	3.85	3.56925	4.50843	0.250962	6.16229	3.81455	1.95233	4.09085	2.97269	4.07639	0.0143553	1.1177	0.226509	4.0054	6.25229	1.17632	2.36457	6.94404	4.19613	5.51791	5.42995	6.8976
ACH-000643	5.24793	0	5.95327	2.04963	3.48414	0.298658	3.26903	5.2817	4.21023	4.13175	2.21101	3.22805	4.29425	3.08746	3.26003	0.0143553	4.85699	4.15543	4.26303	3.12763	4.94907	5.85848	7.58706	1.03562	0.0426443	0.863938	0.189034	4.11936	6.39866	3.13586	0.0976108	6.42492	0.422233	0.389567	5.48639	3.51728	3.27501	2.1177	4.2817	2.79701	3.51223	5.30012	0.250962	0.879706	7.54234	1.02148	5.39506	4.8166	6.78254
ACH-000234	3.93168	0	6.19869	3.83895	3.25852	0.0285692	0.963474	6.34163	6.80336	4.56925	2.54844	3.27798	5.28651	2.1375	5.28318	0.584963	3.62293	4.46793	4.57531	4.21335	5.64616	5.19417	7.0278	0.790772	0.0426443	0.137504	3.58976	4.01881	7.84009	4.12846	0.201634	6.56468	5.19692	4.51349	1.85599	1.98914	4.70764	2.76977	7.51979	3.853	3.6565	5.63372	0.443607	2.07382	7.05799	2.61824	5.96	5.0018	7.52748
ACH-001498	1.74416	0	6.84674	2.14731	3.66676	5.2521	0.0143553	1.64155	4.10098	4.24641	2.33342	3.33771	5.23304	2.72247	0.0285692	0	3.67356	6.80491	3.59932	2.26003	4.23189	6.30177	2.35896	0	0	0.0703893	0	3.68706	6.17951	6.03078	0	6.40633	0.0143553	0	0.286881	0.0426443	2.49313	1.53605	5.68566	0	4.18507	5.80503	0.176323	0.0143553	6.70915	2.89336	5.98687	0.250962	7.77109
ACH-000896	5.91145	0	6.46923	1.93734	4.07296	0	0.454176	5.91169	4.52544	4.43896	2.04963	3.97911	5.6761	3.41819	2.21101	0.0976108	4.10434	5.90689	3.60288	1.97453	6.60718	5.52982	8.71335	1.21412	0.0703893	0.0703893	0.739848	4.96947	7.60526	4.08831	0	7.0555	0.0565835	2.97636	4.849	5.58946	3.53978	2.22651	5.45681	3.58736	2.63923	5.0148	0.505891	2.26003	8.41705	3.14241	6.28263	3.59335	7.61117
ACH-000203	4.83542	0.0285692	5.53387	2.77189	4.0018	0.0143553	2.83794	3.08236	5.82324	6.50319	0.815575	2.78869	6.32229	2.15381	3.13258	0	5.30012	6.45385	5.7339	4.0917	5.70653	5.26115	7.1057	1.91839	0.454176	0.0565835	0.545968	4.30524	5.70681	4.32912	2.07724	5.99481	8.06291	1.27501	8.05501	5.06996	4.23726	0.214125	3.81455	1.07724	4.46989	7.74396	4.02768	4.12433	7.79837	5.40599	5.59604	4.38336	6.61221
ACH-001607	5.10182	0	6.8936	2.03562	2.9855	0	2.78869	5.27947	4.89336	4.56864	2.51349	4.09845	5.06523	0.250962	2.49057	0	4.47444	5.20124	4.0072	2.09085	6.11228	5.03122	6.90207	2.99277	2.65076	3.96717	0.948601	4.36877	7.16792	3.38957	0.948601	6.1819	0.0426443	1.64155	1.27501	3.70377	3.55336	2.15704	5.54628	7.76825	3.89821	4.98732	0.163499	0.731183	7.74886	0.495695	5.99594	3.74201	7.40369
ACH-001441	5.2292	0.0143553	5.80916	2.23266	2.09761	0	2.04963	4.74093	4.9331	4.22728	2.45943	0.31034	4.52105	0.0285692	0.344828	0	2.98732	5.76951	3.95327	3.37712	3.42358	4.60644	5.56377	0	0.0285692	0	0	2.66221	4.87676	3.41007	0	6.02945	1.30451	1.89918	3.80839	3.31904	3.05311	0.0565835	3.37016	1.7866	3.56194	5.23534	0.613532	3.851	6.0354	1.11103	4.96671	3.56682	6.57939
ACH-000112	0.0976108	0	6.48655	2.65076	4.05658	4.65421	0.201634	3.16189	3.66448	4.0036	2.08406	2.52857	6.25965	0.879706	0.765535	0	2.60644	5.0054	3.89627	3.60763	4.01436	5.52857	5.69877	0.0703893	0.422233	0.111031	0.0143553	5.142	6.01235	4.63749	1.66448	7.60162	0.650765	0.189034	2.64847	0.124328	2.86394	2.50335	5.71425	0.275007	4.02059	6.6669	0.85599	3.23419	6.1916	1.72247	5.87897	1.85599	8.11582
ACH-000186	4.40871	0	6.43646	1.97453	3.87873	0.0426443	3.34341	5.89579	5.20984	4.30378	3.19692	3.90304	4.2149	3.24184	1.52105	1.77821	5.06996	6.46989	4.84147	3.14078	5.53854	4.52482	7.30634	1.60881	1.89142	0.163499	0.704872	4.87086	6.96463	3.67694	0.214125	6.77637	0.0565835	1.08406	5.2032	3.74308	3.43962	2.58015	5.04308	6.22612	3.32481	5.01302	0.400538	1.80735	8.01692	0.669027	4.28688	4.55029	7.81839
ACH-000677	3.91743	0	6.26115	2.94111	4.55029	0.176323	0.250962	5.77347	4.68482	4.42492	1.8679	3.23266	5.83693	3.5008	0.863938	0.137504	5.0781	5.55674	5.62	3.14893	6.13791	6.01547	7.61545	0.176323	0.111031	0.163499	1.47508	5.41684	7.40028	4.09339	0.344828	6.47832	0.0285692	4.60703	3.33342	5.08236	5.0691	0.443607	6.0321	1.4957	4.72846	5.92315	0.555816	0.201634	7.22217	1.67356	6.56438	6.56392	8.20438
ACH-000055	4.43429	0.0703893	5.40633	2.5656	4.30305	0.31034	0.0840643	0.475085	6.0881	4.0781	2.71589	2.64155	6.45861	1.72683	5.26491	0.15056	2.70487	4.11936	3.83895	4.0045	5.07553	5.84975	7.43171	0.0426443	0.0840643	0.0143553	0.124328	3.19535	6.86419	3.62293	0.275007	4.70764	1.28096	0.847997	1.90304	3.48285	3.4019	0.739848	5.06695	0.15056	3.87873	7.0935	0.516015	4.39849	5.75596	4.03826	6.51617	3.22497	7.8275
ACH-000485	3.72683	0	5.42089	2.10434	2.34767	0.0285692	0.0143553	6.30907	5.8622	3.29719	1.88362	3.66676	4.6865	1.60881	3.28983	4.28836	4.44427	5.37678	4.81352	2.73552	5.39335	5.57016	7.41962	1.61353	1.848	0.0426443	0	3.79597	6.73322	3.53356	0.201634	6.59171	0.0565835	0.137504	4.87234	4.16912	3.40871	2.25096	4.10266	4.73985	3.10769	5.48317	0.226509	2.41414	7.36256	3.92695	6.3336	4.26153	7.53683
ACH-000672	5.04089	0	6.1152	1.15056	1.81967	0.0285692	3.27947	4.82731	6.02037	4.39369	1.86394	4.75168	4.90689	3.36737	0.137504	0.0565835	4.75969	5.26866	5.18349	5.45088	5.84499	5.30086	7.22323	1.70929	0.0143553	0.0285692	0.411426	4.06437	7.03727	3.34199	0	7.91163	2.84599	2.18269	2.58015	4.65019	2.54844	0.704872	4.85549	6.54767	3.58135	6.52309	1.20789	2.0072	6.54689	0.176323	6.19613	4.36807	7.90737
ACH-000287	0.0976108	0	6.01926	2.81558	4.00899	0.0976108	0.0426443	3.20477	4.40735	4.52105	2.22651	3.29425	5.63952	2.31904	0.0840643	0	3.82375	5.34447	4.68032	3.35614	5.29499	6.46777	5.95838	0	0.0285692	1.9222	0.137504	4.34696	5.48188	4.32409	0.0565835	6.88716	0.0426443	0.0285692	1.66903	0.0565835	2.96532	3.18587	3.89627	0.356144	3.97453	6.71328	0.782409	0.0426443	6.93652	1.28688	6.13443	1.82782	8.34421
ACH-000784	3.74524	0	6.76765	2.29278	2.39506	0.0285692	0.0565835	0.176323	9.28942	3.64386	1.96347	3.39643	5.43229	0.0143553	2.41684	0	4.27947	5.50843	4.7126	4.06867	6.32445	4.85848	6.29829	0.594549	0.0143553	0.495695	0.731183	3.93357	6.04155	3.78555	0.189034	7.69237	3.83996	0.910733	0.594549	0.378512	3.47638	1.07724	0.782409	0.214125	3.39506	5.50271	0.411426	0.613532	7.11634	0.687061	5.78162	4.36177	7.08396
ACH-000530	5.33414	0	9.08579	2.58496	3.76235	0.15056	4.88362	4.43496	5.0054	6.16289	3.54226	2.71809	5.97246	3.77505	2.42761	0.0143553	4.61824	5.26078	4.87873	4.5435	5.98048	6.32607	8.05463	0	0.0143553	0.0703893	0.0976108	5.96209	6.66619	4.32481	0.344828	6.63778	0.250962	0.695994	3.57046	4.27501	4.38819	0.0426443	4.28021	0.62293	4.35332	6.7256	0.918386	0.321928	8.01419	4.56133	6.64904	2.35896	7.34749
ACH-002024	3.40327	0	7.21936	2.29866	3.14241	0.0285692	0	5.50208	5.34199	3.81967	4.41075	5.34234	5.15421	4.29866	2.24793	0.378512	4.33842	6.50621	5.18785	2.78869	4.93734	5.29425	0.815575	3.29425	10.6542	0.298658	0	4.20633	6.36859	4.2555	10.1381	6.62088	1.25701	0.189034	6.87467	4.15218	3.32337	0	3.8125	0.0143553	3.65191	4.91504	3.33771	2.28688	8.65015	2.71809	5.17433	7.10654	7.23093
ACH-000380	0.0703893	0	6.17991	2.64847	4.67469	0.0426443	0.0285692	1.852	4.88313	4.94111	3.10769	3.72901	6.12288	1.09761	0.584963	0.0426443	3.80839	5.90159	4.75756	3.80529	5.7148	5.80632	0.464668	0	0.807355	0.799087	1.33342	3.36737	6.04221	4.24565	0.0285692	6.63662	1.23879	0.0143553	0.0703893	0.137504	2.96532	4.5097	5.20006	0.124328	3.20633	6.43962	0.214125	0.0143553	7.78921	3.7939	6.30943	5.15299	7.09392
ACH-001737	3.57046	0	5.94696	2.59932	4.35826	0.298658	0.137504	0.344828	4.93876	5.12267	2.92979	3.7137	5.56773	2.52607	2.80529	0.613532	4.2854	3.47119	5.55336	4.88411	5.16471	5.25814	8.5529	0.0143553	0.137504	0.0703893	0.0285692	6.49793	6.52873	4.03826	0	6.8426	0.201634	3.06005	2.98914	2.47249	4.23955	4.24108	4.95093	2.37016	4.12846	6.70901	1.01436	0	7.15522	2.7761	6.11624	5.45582	7.10884
ACH-001400	2.73769	0	3.75809	0.823749	1	0.516015	3.44758	3.25096	2.34199	1.53107	1.02148	2.09761	2.19535	0	2.10769	0	1.5008	2.20163	1.59932	0.903038	2.26604	1.65535	4.32337	0.748461	0.669027	0.485427	0.0285692	3.1635	3.44493	1.1375	0.137504	4.8339	1.61824	0.238787	0	0.298658	1.02148	1.23879	2.63459	3.6017	2.19535	2.70708	0.0976108	0.0426443	4.94205	0	2.63923	1.58976	4.20163
ACH-001054	5.70321	0	5.46989	2.03562	3.29425	0	0.124328	0.0565835	5.22728	4.00899	2.06695	2.38128	5.77479	0.163499	4.90641	0	3.04439	5.7148	4.18507	2.9982	4.5404	5.4489	6.48591	0	0	0	0.0143553	2.85599	3.91648	3.774	0	5.80658	3.09255	0	0.887525	3.57652	3.54473	0.238787	0.137504	0.0143553	3.74308	4.84499	0.176323	4.37365	6.75195	3.62293	5.49985	5.22997	7.604
ACH-000009	6.4957	0.0976108	7.97631	2.24489	4.45746	0	0.0426443	7.12153	5.69153	4.62527	2.488	2.89142	5.5472	2.04264	2.70929	5.89506	4.37226	6.64717	4.90352	4.51475	5.16952	6.17552	8.21057	0.713696	1.09761	0.0840643	0.790772	4.39369	7.1981	5.25927	4.14568	7.58609	3.24031	0.85599	4.89336	5.85449	4.63517	2.32481	6.24031	5.38059	4.62877	6.43929	0.722466	4.20867	7.9273	5.12763	8.2181	4.72955	7.15532
ACH-000491	0.695994	0	6.50255	2.10098	3.91265	0.163499	1.23879	5.35509	5.59305	4.17871	0.344828	2.18587	4.78136	1.57046	0.650765	1.47508	4.11603	5.67073	5.12143	4.05485	5.45418	5.43162	9.16927	1.07039	0.0426443	0.0703893	0.137504	5.08066	5.9905	3.48929	4.27426	6.59425	4.49378	0.163499	5.34908	4.98459	4.63923	0.0426443	3.34767	7.12887	3.86592	6.23189	1.28096	3.97361	8.17911	4.3505	5.76713	5.59335	8.0676
ACH-001703	0.111031	0	3.84699	2.49057	2.36457	5.52857	0	0.432959	2.33342	3.89724	1.91839	2.77189	4.65306	0.863938	0.263034	0.0143553	3.08236	4.49697	4.15137	4.79546	4.55336	5.03958	4.26754	0	0	0.432959	0	7.02104	5.02547	3.77716	0	6.72124	0.31034	0	0.731183	1.13093	1.29866	0.137504	4.63749	0.0143553	4.1635	6.80839	0.650765	0	6.58931	2.28392	5.3512	5.03298	6.64458
ACH-000002	0.189034	0	5.63343	1.26303	3.15218	4.18903	0.163499	4.16189	4.13996	2.79909	1.26903	2.83188	5.20867	0.933573	0.201634	0.0703893	1.81558	3.21101	3.95233	2.89142	4.44692	5.2407	5.01748	0.0143553	2.63459	0.124328	0.0703893	5.89385	5.16672	4.1177	0	6.80864	0.124328	0.124328	2.74201	0.111031	3.38957	1.9782	4.6311	0.464668	4.1914	6.17552	0.782409	0.124328	6.59051	0.176323	5.50271	5.98003	7.30615
ACH-001568	3.35332	0	4.74846	1.03562	1.88753	0.0285692	0.137504	5.25626	2.18903	3.7845	2.45154	3.37573	4.71534	0.941106	0.111031	0	3.36177	5.82222	4.0072	2.854	4.19692	3.24945	7.57811	0.286881	0.0143553	0.0840643	0	6.13217	4.7666	2.96532	0.238787	7.31832	0.15056	0.15056	0.594549	4.37643	1.9486	0.847997	1.31615	0	3.80116	4.27352	0.722466	1.0635	6.41312	2.16672	5.0955	4.23726	6.8653
ACH-000993	3.87381	0	5.03298	1.65535	2.97085	0.0285692	0.0285692	5.59753	3.49825	3.09761	2.14731	3.49313	4.47119	3.26003	2.14731	0.443607	3.78555	5.02503	3.92315	2.28392	5.22265	5.56438	5.01257	0.85599	0.0426443	0.163499	0.163499	3.98094	6.57637	4.04002	0	6.62775	3.7761	1.20789	1.774	4.07211	3.57652	1.49057	4.50016	0.226509	3.17313	6.30561	0.565597	0.978196	6.36999	0.321928	4.89239	4.80478	7.02425
ACH-001578	6.90123	2.96162	7.10716	2.39232	4.22188	0.0285692	0	5.75836	2.87184	3.50208	4.05485	2.79077	6.35262	1.65076	0.678072	0.0143553	3.48929	4.29646	4.27798	3.68594	4.66562	5.58286	5.31832	0.0285692	0.0426443	0.0703893	0.847997	3.94767	6.25229	4.57773	0.0840643	7.42021	4.54226	0.62293	2.97269	5.10392	4.21412	1.82782	3.77821	1.61824	5.21374	5.58286	2.11437	3.15866	6.47168	0.903038	6.17033	3.09424	8.82114
ACH-000877	0.0976108	0	5.75489	3.15381	3.48543	6.44774	0.0703893	0.263034	4.82477	4.24717	3.60881	3.9222	5.16952	2.70929	0.0703893	0.189034	4.27873	5.03606	5.01212	3.49185	6.09972	7.71802	4.91169	0	0.163499	0.0976108	0	4.41007	5.82477	6.23668	0.0840643	6.76394	1.76977	0	1.59455	4.79909	2.89142	1.3505	6.62688	0.214125	4.34412	7.19997	0.903038	0.0976108	7.31216	2.16672	6.595	1.53605	8.06221
ACH-000711	5.1631	0	7.58045	2.53107	4.80271	0.15056	0.333424	5.84549	4.37851	4.02148	3.07382	4.59455	6.17133	1.1375	5.34341	0	3.97728	4.01881	3.65421	3.11936	6.65292	4.75007	6.99741	0.584963	0.0143553	0.565597	1.52105	3.91073	7.48422	4.33128	0	6.84046	0.0565835	2.49057	1.47508	4.74631	3.70044	2.29866	4.90833	4.40259	3.6893	5.76845	0.163499	0.389567	7.43187	1.68706	6.94146	5.11894	7.80935
ACH-001515	5.09466	0	6.58195	2.89918	4.38059	0	1.38405	5.60496	6.38319	3.55459	2.58256	3.14078	5.13258	3.15543	4.86196	0	4.07468	6.6799	4.95559	2.75702	4.849	6.14343	6.38716	0.0840643	0.0143553	0.0285692	1.67356	3.83086	6.12433	3.95606	0	6.91373	3.83188	1.15056	4.774	2.82579	3.2032	3.32912	4.03386	1.15056	3.44361	5.1631	0.286881	2.72901	8.29829	2.20789	6.27109	3.89627	8.76129
ACH-000702	0.378512	0.0285692	6.55105	3.52482	3.848	0.124328	0.111031	3.12267	4.94486	5.30597	1.90689	3.59096	5.94696	3.82883	0.124328	0.111031	4.70984	6.23879	5.0237	3.5472	6.04111	6.35632	6.59723	0.669027	0.286881	0.176323	2.1635	4.97865	6.27221	5.393	0	7.02303	0.765535	0.536053	0.400538	0.238787	3.61941	1.65992	7.99322	0.62293	4.60229	7.12743	0.575312	0.0703893	7.57259	4.14405	6.79116	0.485427	8.26777
ACH-001020	5.60555	0	6.86258	2.10434	4.05572	0	0.0285692	5.55827	4.51916	4.14323	1.80735	2.98368	5.51286	2.84197	4.42962	0.0143553	4.22188	6.53916	4.78607	3.15866	5.85972	5.54782	7.37626	0	0	0.0285692	0.454176	4.23266	6.21179	4.01346	0	7.0635	2.44095	0.189034	0.443607	4.17313	3.14731	0.0285692	4.21723	0.137504	3.97911	5.40905	0.250962	0.0143553	7.45294	0.632268	6.4872	6.64097	7.90497
ACH-000600	4.35685	0	6.47102	2.34199	3.82375	0	5.78529	7.05626	3.60999	4.16108	1.8953	3.55336	5.54102	1.80735	2.49057	0.687061	4.54164	5.19574	5.27984	3.79494	6.2589	5.82299	8.16867	0.333424	0.344828	0.111031	0.201634	3.9644	6.55259	3.9279	0	7.40045	3.08746	2.84197	1.72683	2.0072	4.39849	1.83188	6.44526	6.4224	3.67807	5.69544	0.298658	0.275007	8.30506	0.815575	6.48864	6.03716	7.61618
ACH-000354	4.51349	0	6.399	2.68482	3.41414	0.226509	1.87578	5.24336	4.61117	3.57168	2.92979	3.44626	4.51412	2.93357	2.39232	3.12433	5.26641	6.79338	5.4822	3.60051	5.5601	4.89676	4.8674	3.12433	3.58616	0.650765	0.31034	4.88655	7.51404	4.58496	4.27352	5.79546	0.464668	2.926	6.61794	5.34341	4.21412	3.09424	6.77307	5.21645	3.30159	7.43237	0.545968	2.48285	7.36343	3.62761	6.37903	2.20163	7.10371
ACH-000012	5.80245	0	5.99774	1.97085	3.7845	0.0285692	2.75061	6.22284	4.40803	4.10014	2.50335	4.76235	6.60229	2.12102	0.333424	0.0143553	4.5292	5.54226	4.53481	3.94111	5.09803	6.07146	6.00899	1.79077	0.545968	0.250962	0.356144	3.87971	7.62819	3.68594	0.0143553	6.78725	0.659925	0.275007	4.36036	5.38819	3.91361	2.38957	5.9798	6.01659	3.98914	5.85674	0.495695	1.88753	7.20653	1.62761	5.83693	2.21412	7.95832
ACH-000689	5.04658	0.0285692	6.5815	2.21101	2.18903	0.0426443	3.94579	6.81224	4.09761	4.55704	1.52607	4.38059	5.00225	1.87578	1.05658	0.0703893	5.19377	5.17113	5.03562	3.41278	5.99254	5.66021	7.46655	0	0.0703893	0.0976108	0.137504	4.92315	7.76871	3.84699	0.0143553	5.97085	1.23266	2.10098	0.321928	3.0993	4.77821	1.09761	3.46989	5.98778	4.20477	5.68706	0.695994	0.773996	7.19387	3.3799	5.87258	5.95093	6.77518
ACH-000459	3.32769	0	6.1299	2.85997	4.18428	0.0703893	4.85798	6.38076	5.78633	4.19771	2.50589	4.11603	4.8525	2.488	0.918386	0.0143553	5.80684	5.64414	4.96993	3	6.86071	7.97436	8.32071	0.189034	0.163499	0.111031	3.03386	4.66959	7.64659	4.81865	0.124328	7.18021	0.15056	0.263034	2.69377	1.83996	3.90785	2.62059	6.57137	5.41988	3.49185	4.89821	0.687061	0.0285692	7.95791	1.33342	6.42844	3.65992	8.8031
ACH-001413	5.07339	0	7.70674	2.70929	4.76607	0.0565835	1.48027	7.03573	4.48543	4.24641	4.0054	4.53667	5.91313	1.40054	0.411426	0.0426443	4.69377	5.46205	4.88947	3.71699	5.57984	5.83061	7.51112	0.555816	0.0143553	0.176323	1.41684	4.18824	6.65921	4.34483	0.0143553	7.24688	0.970854	3.77716	1.69599	2.46728	3.78241	1.25701	4.21179	6.14588	3.35755	5.65735	0.464668	2.32769	7.55888	0.799087	6.33735	3.72465	7.54851
ACH-000686	4.75382	0	6.46303	2.66448	3.84097	0.0565835	6.3637	7.39643	6.07938	4.05572	2.33056	3.2765	5.45022	2.08066	1.89918	0.704872	3.93829	5.39094	3.74631	2.99277	5.61941	5.39883	7.98584	0.910733	0.201634	0.0426443	3.84398	4.25626	7.68867	4.64501	1.31615	7.89833	2.4489	4.08321	0.344828	2.60881	4.3799	2.45154	4.96255	7.65399	3.77189	5.98527	0.687061	2.26003	6.63633	1.54597	6.89579	4.56621	7.69384
ACH-000342	5.64443	0.641546	6.8358	2.67582	3.38405	0.176323	0.0840643	6.93227	5.44857	4.22651	1.9855	3.61824	4.93168	3.6893	4.90593	4.79649	4.22651	6.26228	4.40803	2.50335	5.55766	5.85025	7.37321	2.33056	6.46923	0.0285692	0.201634	3.74739	7.28383	4.2149	6.71012	6.74349	0.238787	0.432959	6.08215	4.55397	3.74846	2.11103	6.0881	2.03914	3.93168	5.35332	0.367371	0.137504	7.84442	3.83895	6.11582	5.32193	6.8591
ACH-000208	4.45022	0	6.09297	2.28096	4.10852	0.176323	6.20984	7.56392	3.38128	4.57592	2.93546	6.57243	5.94509	0.545968	0.0976108	0.124328	4.73769	6.23285	5.08066	3.89336	6.59485	5.47054	9.50448	0	0.0426443	0.0703893	2.94298	5.94158	7.0027	4.1152	0	6.95873	0.238787	3.06695	0.321928	2.37295	4.51223	0.0703893	4.79961	6.06609	3.73552	6.93981	0.678072	0.250962	7.57372	4.11603	6.21607	6.42911	7.41363
ACH-000360	5.5097	0.250962	6.19771	2.31325	2.16993	0.0285692	0.0565835	5.91193	5.07382	3.66676	1.98914	3.39232	4.29572	3.36457	1.0635	5.87774	3.96809	4.85997	4.70708	3.30889	4.97545	4.68874	6.37764	1.91839	6.32157	0.887525	0.275007	4.03562	6.91683	3.52356	3.0321	6.47233	0.0976108	0.0285692	5.99095	3.46205	2.69599	2.88166	4.24184	1.68257	4.06953	6.45121	0.713696	0.0285692	7.33324	3.60051	6.13976	1.85599	6.98379
ACH-000249	3.89627	0	6.06307	1.94111	3.3505	0.0565835	0.422233	5.52638	3.95513	3.69377	2.74201	4.43896	5.01525	1.73552	4.09339	2.14078	5.24146	5.91361	5.478	2.38681	5.50303	5.97705	8.08529	3.78136	4.1177	0.536053	0.189034	5.73823	7.42417	3.91743	0.739848	6.67878	0.62293	3.20163	6.49025	5.87381	4.26978	2.32481	6.11082	3.47119	3.74093	6.44923	0.422233	2.59694	8.53982	3.59574	6.35562	5.68117	8.18502
ACH-001368	3.80839	0.0976108	7.40497	1.77821	3.52982	0.0143553	1.52607	6.92979	5.61794	4.81558	2.28392	2.91648	5.68734	2.90304	0.214125	0.0565835	4.92932	6.67793	5.38474	2.53854	5.01436	6.47314	7.12939	0.0426443	0.0285692	0.0285692	0	2.8339	5.38336	3.74201	0	0.545968	1.97085	0.871844	1.54597	3.28983	3.90977	1.25096	7.52802	0.536053	4.13504	5.43396	0.226509	0.275007	7.44037	0.389567	6.29756	0.678072	8.54295
ACH-000231	5.10182	0	6.44079	2.39506	4.23113	0.176323	2.51096	7.07478	3.84298	4.25172	3.47897	4.60585	6.38905	2.04264	2.03914	0.0143553	4.87922	5.22497	4.59813	2.38405	5.78319	6.73485	9.39906	0	0.0840643	0.124328	0.333424	4.25399	7.15916	4.4019	0.137504	6.85412	3.79701	1.46989	2.07039	4.80064	3.62527	1.20163	4.5292	2.19849	2.95233	6.79662	0.739848	0.176323	7.58383	3.30743	5.4545	5.84674	7.94287
ACH-000945	3.94579	0	6.52011	2.62761	3.07382	0.111031	0.0703893	6.12866	4.66278	4.904	3.08236	4.12267	5.81275	2.55336	0.275007	0	4.93074	5.67948	5.2521	4.28021	6.69933	5.62615	7.10455	0.0143553	0	0.400538	2.58015	5.23266	6.85337	4.0917	0.0840643	7.64551	1.59932	2.29278	4.86641	4.02591	4.27724	2.90497	7.3025	7.9341	4.53667	6.55949	1.66903	5.31107	7.19298	0.575312	5.20594	4.00899	7.6268
ACH-000662	5.70929	0.0143553	6.89833	1.90689	4.13504	0.0426443	0.0143553	5.6311	4.17073	3.69711	1.96717	4.07039	6.01056	2.24489	1.87184	0.0426443	3.87086	5.49057	3.90785	3.20945	4.63923	5.83719	6.16952	3.44228	0.333424	0.454176	0.575312	4.17552	6.64875	3.02503	0.485427	6.20438	0.536053	0.0285692	3.68482	4.56864	3.49697	1.82782	6.22304	0.356144	4.17313	4.78031	0.31034	3.77926	6.84461	2.20163	5.97499	2.03914	8.60236
ACH-002458	3.0036	0	7.93623	2.27202	3.62877	0	4.03122	6.15198	3.49953	4.08491	2.21723	5.13175	4.42492	0.871844	1.67356	0	4.30012	4.66732	4.65707	3.4019	5.26641	5.36737	8.66067	0.111031	0.0976108	0.201634	0.545968	3.40327	6.10622	3.50589	0.0143553	7.33199	0.782409	1.94486	2.31034	3.86592	3.53481	1.22651	4.21568	4.28244	3.72792	6.24793	0.367371	0.15056	7.17552	3.31904	5.53605	5.0387	7.00955
ACH-001378	4.22342	0	4.08321	1.09085	2.62994	0.0285692	2.07382	4.1643	1.81967	3.53232	1.57046	3.06178	4.36457	1.24489	3.22033	3.97361	2.63227	5.27314	3.09085	2.82985	5.4614	2.19535	6.17991	4.26303	6.45483	0.378512	0.0565835	5.87823	5.74147	2.488	3.15381	6.50764	0	0.495695	4.42492	2.45418	2.1177	1.80735	5.25248	3.41278	3.45812	5.06307	0.378512	0.333424	7.30415	0.163499	5.22072	4.28244	5.57501
ACH-001029	6.59171	0.201634	5.44228	2.8953	4.916	0.0285692	0.464668	0.464668	3.47897	5.53792	1.1635	2.76341	6.02392	0.941106	2.88557	1.46467	5.31976	7.24165	5.78869	3.31179	5.91743	5.37678	11.3046	0	0.0143553	0.124328	0.0285692	4.85997	5.89409	3.90304	4.56925	5.91217	6.04461	3.69042	0	4.15137	4.46401	0.748461	4.16993	0.62293	4.07125	6.31524	0.910733	1.25701	7.99424	4.27873	6.34216	3.81865	7.08108
ACH-000248	4.09255	0	6.74537	3.51096	4.31976	0.111031	0.0840643	5.99548	5.34341	3.97911	1.51096	3.72465	5.47151	0.757023	5.69377	0.0565835	4.91409	6.61971	5.38474	3.75275	6.30031	5.75756	5.24489	0.15056	3.19219	0.0703893	0.137504	4.23802	5.51001	3.0268	2.80941	6.75902	1.55582	0.0143553	0.632268	3.02857	3.38543	1.28688	5.21179	0.925999	3.59694	6.10014	0.298658	2.65764	8.86189	1.10434	7.39429	5.80993	7.83251
ACH-000943	3.67469	0.0285692	7.2604	1.29278	3.78555	0	0.176323	5.85798	4.10685	4.45549	2.25701	2.69599	4.37573	2.50589	1.21412	0.344828	3.97177	5.07767	5.17552	4.20477	5.7339	5.14445	6.31252	0	0.0840643	0.176323	1.82782	2.65306	5.30961	3.96993	0	7.05745	0.0285692	1.9222	1.9486	2.65764	3.42492	1.37851	3.46597	5.49857	4.24031	6.70321	0.918386	2.74846	7.27668	2.92029	5.35473	4.65076	7.77017
ACH-000751	1.19535	0	6.48204	2.43296	3.26754	0.0565835	6.04898	5.97888	5.3565	4.12433	1.53605	3.85	5.00944	1.68706	0.0426443	1.20789	7.36212	7.38681	8.02142	3.42358	5.11312	6.8896	6.59753	0	0.214125	0.0426443	0	4.97774	6.09508	3.97453	0.124328	7.29994	0.799087	0	4.44162	0.111031	4.21801	3.41278	5.55704	4.55213	3.74093	5.52826	0.594549	0.0426443	6.42978	1.38957	6.41684	1.87971	7.06921
ACH-001016	2.96162	0	7.30551	2.79286	3.62059	0	0.454176	5.5509	4.22651	4.97545	4.39025	5.61088	5.40973	0.321928	2.6017	0.176323	4.96532	6.1375	5.43162	3.74201	4.98641	5.28873	7.77663	0.226509	0	0.214125	3.15218	4.13996	6.27277	5.19495	0	6.52842	3.20477	1.73985	0	2.14731	4.65306	0.847997	4.79649	6.06846	3.76022	6.00607	0.83996	1.90304	7.03232	4.26454	7.09085	3.2765	7.30579
ACH-000282	3.07039	0	6.30104	2.20789	4.37226	0.0143553	4.0018	5.69432	6.81429	4.42694	3.94111	3.80839	5.57046	1.18903	1.47508	0.713696	5.02591	5.18785	5.47638	4.07468	6.14649	5.87431	7.28633	0.163499	0.275007	0.0565835	3.95977	4.57954	8.11629	3.8339	4.17233	6.17053	1.20163	1.54597	4.0781	2.70044	4.73985	0.422233	4.32265	2.64155	3.68818	6.04854	1.52607	4.17552	7.24954	3.8166	6.34554	5.79986	7.92878
ACH-000261	4.44758	0.0285692	6.74886	2.65076	4.60763	0.0426443	0.687061	6.40037	4.27426	4.82883	3.63923	4.34056	6.39111	3.90497	2.62994	0.111031	4.36667	6.19613	4.59335	3.32193	6.33145	5.56712	7.86493	0.214125	0.201634	1.51096	1.23879	4.89821	6.83895	3.44758	0.15056	6.56484	0.704872	1.848	3.53107	3.4957	5.0197	2.63227	6.82833	6.62994	3.45943	5.90256	0.575312	2.28688	6.93499	0.85599	5.53947	5.24641	7.61677
ACH-000164	2.43029	0	6.15198	2.33914	3.55949	0	0.0976108	5.94298	4.87823	4.34696	2.35614	2.7137	5.99413	1.63227	5.16511	0	4.75114	5.88069	4.81198	2.77189	6.08087	6.22284	6.11228	0.286881	0.0143553	0.263034	1.02148	4.87283	6.52356	4.67412	0.0143553	6.82922	0.176323	2.68482	0.356144	4.50271	5.31034	0.111031	4.56742	5.73985	3.73769	5.90953	0.226509	0.0285692	7.37704	2.07382	7.06942	7.24031	8.04718
ACH-001793	3.75168	0	6.55275	2.57289	3.40599	0.124328	6.99842	4.89433	4.34696	4.53792	3.05137	4.87135	4.75328	3.45549	0.356144	0.137504	3.86295	5.43496	3.89336	2.50589	4.66164	7.81397	8.99845	0.275007	0	2.60407	1.71809	4.43429	7.16239	4.56742	0.475085	6.73471	2.40327	0.536053	2.16027	1.7137	4.28614	1.92979	7.22487	8.15618	3.51602	5.1534	1.19535	6.6575	6.42274	2.67129	5.79312	4.31615	7.64407
ACH-000262	4.48478	0	6.99175	1.73118	3.74953	0	4.02591	6.14649	3.94205	3.99729	1.78241	2.4489	5.31759	1.36737	1.87184	0	4.84248	5.61677	4.74739	4.04701	6.24317	5.26791	7.87018	0.356144	0.0285692	0.0565835	2.82579	5.26641	7.45113	4.48864	0.0285692	7.48736	0.871844	1.32769	0.545968	3.30743	4.85549	2.07724	6.02879	5.79675	3.98732	5.51791	0.454176	0.475085	7.32166	0.765535	6.4138	4.23573	7.23965
ACH-000158	0.226509	0	6.28448	2.96532	5.27798	0.0285692	0.0976108	3.03386	4.50398	4.87774	2.07039	1.99277	6.45352	2.51602	0.226509	0.124328	3.60644	5.79103	4.7939	4.10098	5.11562	5.86666	6.19554	0.0285692	0.111031	0.0703893	0.378512	3.25852	5.22072	5.65335	0.137504	7.09919	1.17632	0.0143553	0.555816	0.111031	3.28392	1.33914	8.43229	0.0703893	3.96717	7.21607	0.378512	0.0426443	6.48816	3.95699	6.08257	0.189034	7.0994
ACH-000773	0.0703893	0	5.804	3.37434	4.38405	0.0143553	5.22651	5.29241	3.90497	4.79961	2.32769	3.37156	6.03012	3.06523	0.0143553	0	4.34625	2.78031	4.71315	3.01436	5.22843	6.92267	7.36326	0	0.0285692	0.0840643	0.321928	3.79181	4.28762	3.26754	0	6.80349	1.64616	0.0285692	4.94907	0.0143553	3.37295	0.124328	5.30488	0.124328	3.91456	6.61088	5.39849	0.0703893	7.57879	3.20945	5.74362	0.226509	7.52427
ACH-000722	6.75876	0.748461	7.75796	3.46074	3.79597	1.29278	0.226509	5.66761	6.31161	3.46597	2.58496	4.20006	4.60407	2.78241	1.14405	5.89336	4.26153	6.81429	5.40395	3	5.51254	5.54442	5.76951	1.09085	6.46793	0.378512	0.367371	2.24489	6.62571	3.774	2.18587	6.49681	0.15056	0	3.9855	2.04614	3.1177	2.18903	3.9782	1.30451	3.82985	5.8301	0.31034	0.0426443	7.78228	2.61117	6.55013	1.44361	8.34904
ACH-000857	5.61265	0	5.6585	1.77821	3.47249	0.176323	0.454176	5.68285	4.42358	3.35191	2.9222	4.40599	5.14608	3.45943	2.26604	0.0285692	3.69933	5.02857	3.8953	1.93734	5.61206	4.86641	6.11686	1.83188	0.0703893	2.40054	0.400538	3.37851	6.71122	3.7301	0.0703893	6.62205	1.65076	0.0565835	4.17393	4.01703	2.87184	1.66448	4.59991	5.0072	3.19849	4.40735	0.31034	0.0565835	7.53869	0.250962	5.39232	3.53481	6.95942
ACH-001129	0.0976108	0	5.82146	2.3978	3.66789	6.14303	0.111031	5.38267	4.09339	4.6311	1.86394	3.95513	5.65707	0.0426443	2.70266	0	3.22342	6.75221	4.95466	4.03562	4.41819	5.40565	7.36107	0.137504	5.19101	0.15056	1.05658	4.92742	6.12371	4.33771	2.92029	7.10538	2.20477	0.0143553	1.73118	0.275007	2.22959	3.14405	5.49057	0.226509	3.84298	7.28049	1.17632	2.71589	6.7057	2.02148	5.68004	7.44228	9.04811
ACH-001619	5.38198	0.0565835	5.93782	1.61353	2.70487	0.0565835	4.63517	6.47168	5.36912	3.63343	3.01257	3.6792	5.60851	2.0072	2.7866	0.0143553	3.77821	4.60051	4.17871	2.04963	5.55612	4.44956	8.00888	1.23266	0.0565835	0.0285692	2.14731	4.36947	6.48382	3.6427	0.0426443	5.74551	0.0565835	0.0285692	0.15056	3.84699	2.45681	1.93734	4.67864	8.05382	3.66334	4.10852	0.594549	0.879706	8.86842	0.238787	6.30979	4.65878	7.60703
ACH-000184	3.74631	0	6.03034	2.09424	3.22188	0.0143553	4.30086	6.79986	3.32912	3.71589	3.04264	5.15664	4.72901	0.526069	1.27501	0.0143553	4.7366	4.81967	4.54164	2.83996	5.98527	5.66135	9.96511	0.0285692	0	0.176323	0.15056	4.36737	7.65793	4.18269	0.176323	6.34678	3.52356	0.378512	0.111031	2.76765	4.01257	1.07724	5.05528	4.61117	3.59335	6.27947	0.584963	0.111031	7.21578	2.67582	6.17792	4.59634	7.10486
ACH-000329	3.849	0	5.48027	2.33342	4.22574	0.163499	2.45418	6.47978	5.10308	4.63691	0.0703893	1.41684	5.17113	0.0840643	4.59634	1.63691	4.33414	5.03826	4.57471	3.90014	6.79325	6.71644	8.99053	0.0143553	0.111031	0.687061	3.96809	5.07382	6.48961	4.0045	4.30086	6.68748	4.21645	1.65992	0.632268	3.39506	4.1102	0.0285692	3.97728	6.01078	3.39369	6.12763	0.432959	0.189034	7.35949	3.89045	6.86022	6.74524	7.58143
ACH-001569	4.39094	0	6.22863	2.14405	2.37295	0.0565835	0.31034	5.0635	3.40599	3.35332	3.55827	4.01525	4.21801	0.485427	0.669027	0.0840643	4.38543	6.90533	4.79442	3.28392	4.35685	4.71644	8.36715	0	0.0285692	0.0285692	0.344828	7.45376	5.95466	3.28983	0.0565835	6.04067	0.163499	0.0285692	0.695994	3.41819	3.0197	1.1375	2.87971	2.85599	3.57894	5.31868	0.536053	2.34767	6.63212	2.88947	5.59783	4.84599	7.95251
ACH-000814	3.774	0	6.04571	3.16993	4.49313	0.0285692	3.41684	5.804	4.20633	4.20163	3.27501	5.06221	5.32157	0.0703893	0.575312	0.739848	5.09508	5.69321	5.18864	3.3147	5.81404	6.89942	9.29253	0.321928	0.0426443	0.411426	2.11103	7.77268	6.76235	4.30378	0.0703893	7.34376	0.344828	1.01436	3.84699	5.33342	4.54597	1.47508	4.49121	4.1416	3.61824	6.70169	0.739848	1.73552	7.64039	3.61117	6.63662	6.42274	8.05463
ACH-000197	0.31034	0	6.51238	3.16189	5.3875	4.0027	1.75702	1.07724	4.9991	5.70846	0.0840643	1.53107	5.56712	3.18745	0.910733	0.226509	4.55582	5.44626	5.59932	4.05832	5.40973	5.57198	7.85256	0.367371	0	0.0143553	0	5.04352	6.13791	3.21568	0.0285692	6.18804	2.08066	0.189034	1.74416	0.238787	2.95977	3.42089	4.58916	2.33342	4.39232	6.77492	1.24489	0.0703893	6.81775	1.43829	5.65935	6.78057	7.57221
ACH-000545	4.25172	0	5.65105	3.44095	3.27501	1.54102	6.6595	6.47865	5.56621	3.9279	2.74201	4.57773	4.65935	1.44361	3.94111	0.201634	4.89433	6.87909	5.71699	3.61941	5.92125	5.25248	7.10371	5.21023	0.238787	2.89142	0.0426443	3.71699	6.57698	4.31107	0.0840643	6.91564	2.23266	1.09761	6.58225	0.731183	3.39094	2.81967	5.63575	4.55336	5.21335	6.41633	1.63691	0.565597	6.69125	2.12102	5.20516	3.80839	7.83257
ACH-000949	4.34483	0	6.1643	2.60644	2.70487	0.0976108	2.7761	5.58526	6.36737	4.64501	2.86987	4.96532	4.66676	3.74093	2.94486	1.60407	4.96809	6.43146	5.08151	4.76288	5.41549	6.00742	6.60348	0.443607	1.31034	0.298658	0.263034	4.21723	6.416	3.88362	0.505891	7.32715	0.214125	0.831877	5.95513	5.23113	4.85699	2.99095	3.926	7.93044	4.52105	6.78633	0.85599	0.124328	7.0207	3.98823	6.49873	5.51096	7.58616
ACH-000124	0.0426443	0	5.0343	1.85599	3.41143	0.0426443	0.0565835	2.17951	3.93074	5.54319	1.62293	2.97636	5.48993	1.26303	0.137504	0	3.5373	4.40667	4.03034	4.29057	5.35931	5.75836	6.2034	0	0.0285692	0.137504	2.01436	7.42844	5.86344	3.53107	0.111031	6.67582	0.0143553	0.0285692	1.30451	0.0285692	2.24793	2.22651	4.42021	0.137504	3.07211	7.29939	0.389567	0.0143553	6.92017	2.68706	5.58286	4.9528	7.91642
ACH-000560	4.48543	0	5.78136	2.30743	3.53107	0.0840643	0.0703893	5.17353	4.61412	5.91265	2.4957	4.16912	5.30378	3.13093	2.79909	0.978196	5.35755	6.18448	5.90953	3.6893	5.66306	4.73985	5.49633	1.04963	0.321928	0.344828	0	4.77821	5.71177	3.72356	1.88753	5.77373	0.0840643	4.84348	6.40156	4.81455	4.04264	0.111031	1.70487	0.485427	4.05137	6.83706	0.831877	3.24641	8.65907	5.12309	6.05528	4.51602	6.87713
ACH-000897	4.91886	0	7.07532	1.76129	4.03914	0.0285692	1.75702	7.39395	4.26454	5.19377	3.64155	5.52011	6.56071	2.03914	4.27128	0.344828	4.75275	5.13463	4.93782	3.4489	6.25908	6.32427	7.3336	0.15056	0.0426443	0.286881	3.31325	4.69209	6.76461	4.65478	0.0285692	6.75756	1.38405	1.54102	0.344828	1.41684	3.89045	1.37295	3.7939	5.88215	3.68594	6.06544	0.807355	2.54597	7.59223	4.61117	6.75409	3.19377	8.43521
ACH-001626	5.38405	0	7.11562	1.99277	3.04963	0.0703893	1.31034	5.8301	6.73335	3.5008	3.34908	5.07082	5.04658	0	2.16027	0.0703893	3.57652	6.08023	4.02414	2.62761	5.30451	4.95606	6.8157	0.632268	0.0840643	0	1.79909	4.77873	7.70833	4.35332	0	6.69822	3.73877	0.0976108	3.11603	2.64386	2.95977	2.22651	4.0027	1.54102	3.84398	4.72683	0.344828	1.31034	6.81634	2.10434	6.21781	4.55336	7.53356
ACH-000619	4.91695	0	6.33199	2.19535	3.49825	0.321928	3.19219	6.56148	4.5435	3.41819	2.61353	4.51223	4.70708	0.443607	4.91313	0.0143553	5.57773	6.62746	5.64645	3.34056	5.73579	5.83946	7.77485	0.739848	2.86394	0.250962	1.19535	3.72356	6.76593	3.61941	0.163499	6.91994	2.46728	2.65306	3.62644	3.17153	3.46467	2.05311	4.08746	4.69265	3.96347	5.30961	0.344828	0.111031	6.82273	1.63691	5.42223	3.79597	7.15684
ACH-001973	3.40871	0	6.50621	2.94298	3.86096	0.0143553	3.86096	6.472	4.27798	4.29205	3.74201	4.26604	5.03342	1.66903	0.411426	0	3.61589	6.42223	4.39094	2.46989	2.82782	7.60073	8.02237	0.0285692	0	0.0143553	0.0143553	5.32948	5.45319	4.32625	0	7.55451	0.722466	0.124328	3.33914	2.12102	3.8125	2.12763	3.99458	4.58556	3.40871	4.06781	0.565597	2.42223	5.81455	2.34199	6.53107	0.659925	8.43187
ACH-001340	6.0974	0	7.07906	1.22033	3.20633	0.0285692	1.19535	5.02813	4.28762	4.17153	2.43029	2.82985	5.10936	3.33056	4.82069	4.88166	3.57289	5.86641	4.41684	2.926	5.14812	4.80271	4.81558	0.31034	3.76022	0.0426443	0.565597	4.0063	6.24679	3.69711	6.11936	6.77123	0.823749	0.0976108	3.67243	2.96162	2.15704	1.7137	3.63343	0.0426443	3.60051	5.25134	1.25701	5.71644	8.2644	1.12433	5.42559	5.02989	7.89785
ACH-000546	4.90689	0.0285692	6.67384	2.70929	3.21257	0.189034	3.03386	5.0387	4.84649	3.7666	1.80323	2.69599	4.74524	0.0143553	5.35368	0.298658	4.62644	5.14975	5.69181	3.88947	6.27352	4.90641	6.93227	0.31034	2.23573	0.321928	1.41684	4.70598	6.62863	3.65076	0.250962	6.21917	4.41616	2.16672	0.0840643	2.5435	3.08236	2.32481	4.07125	1.25701	3.59932	6.73186	0.333424	0.250962	7.50978	1.48027	5.53792	4.91217	6.18666
ACH-002018	5.12102	0	5.98914	1.86394	4.03562	0.0285692	0.0565835	5.9486	4.62761	4.08151	2.96532	2.96532	4.47054	0.669027	0.773996	0.0565835	3.851	5.26529	4.55582	2.42492	5.36527	5.57803	8.35385	0	0	0	0	3.73985	5.90713	3.63575	0.163499	7.69523	2.20477	1.63691	1.05658	3.74631	3.08236	0.831877	3.51349	3.25248	4.04876	4.92458	0.356144	2.73335	6.66064	0.378512	5.6311	5.36807	8.0114
ACH-000153	4.11686	0	7.31678	1.67807	3.62644	0.367371	2.01436	5.67101	3.49057	3.80116	3.95606	5.94369	5.7866	1.1375	2.56803	0	4.38819	5.00675	4.77347	4.40871	7.6749	5.86022	8.71266	0.443607	0.111031	0.137504	0.641546	3.43563	7.48236	4.46336	0.0565835	6.21762	0.963474	3.11437	0.704872	4.23343	4.37086	2.38128	7.76454	6.10035	4.94767	6.25814	1.05658	3.06523	6.85012	3.80839	6.32193	5.33128	7.45796
ACH-000526	3.77821	0.0840643	5.90256	2.09085	2.69153	0.0285692	5.68398	6.28596	4.02326	3.6241	2.96347	5.24869	4.20085	1.05658	3.22497	0.0143553	4.86839	5.44427	4.64097	2.88362	6.47233	5.52732	9.22222	0.0976108	0	0.0840643	0.687061	5.39472	8.30478	4.29057	0.0840643	6.37921	3.22805	5.01391	0.275007	0.214125	4.1819	0.748461	5.2854	8.95324	3.17153	6.01458	0.516015	0.0426443	7.18765	2.95791	6.13566	6.71493	7.40301
ACH-000116	5.65878	0	6.36422	2.31034	3.85997	0.0285692	0.871844	6.48043	4.77083	3.93357	3.26303	4.12267	5.26379	3.31904	6.42358	0.321928	4.47832	5.94369	5.06695	3.5741	6.55259	5.11894	6.71067	0.356144	0.495695	0.0565835	0.124328	4.25701	7.59335	4.21023	0.400538	6.61927	0.713696	2.15704	3.86196	5.14078	3.70155	4.14975	5.54751	0.422233	3.36597	6.03122	1.28688	0.298658	8.24184	2.85599	5.9486	5.27873	8.12407
ACH-000815	0.505891	0	5.58946	3.63227	4.0798	0.163499	1.43296	0.250962	3.68482	3.73444	2.96717	3.6017	5.54628	2.37851	0.475085	1.18269	3.90593	4.22265	4.54102	3.66676	5.45845	6.31615	4.88606	0.0143553	1.37851	0.0426443	1.99639	4.12763	5.68538	5.14405	0.163499	7.31089	1.43296	3.15381	0.695994	0.124328	3.16672	2.1375	5.64472	4.18903	3.65191	6.39643	2.75702	3.49057	5.59126	2.88557	6.09212	3.36317	7.50438
ACH-001270	3.9542	0	6.8166	2.02503	3.93168	0.0703893	0.0703893	5.43196	3.81044	3.45154	2.94486	2.93357	5.64847	2.95233	3.90689	0.15056	4.1334	5.64126	4.64674	3.10098	5.85425	5.73064	7.67723	0	0	0.516015	1.74416	4.46923	6.92979	4.07895	0.111031	6.62834	0.0565835	3.10098	0.0426443	4.26003	3.20477	0	3.80632	5.67271	3.82375	5.4614	0.948601	3.46597	7.76984	2.66676	5.41007	4.90352	7.46238
ACH-000324	5.21451	0	6.31306	2.41954	4.46728	0.0143553	0.189034	4.58796	4.2765	4.00988	3.72901	4.59574	5.83086	3.68032	0.214125	0.748461	4.09508	6.6595	4.12433	3.7301	5.70432	5.24527	7.24194	0.495695	0.0143553	0.0426443	2.60881	4.7148	7.57984	4.24184	0.111031	7.32526	3.1127	0.863938	4.93499	5.18428	3.92125	1.91073	7.37773	6.11458	3.5472	5.0492	0.545968	1.35614	7.11987	0.0426443	5.21607	1.25096	7.95838
ACH-001561	4.39985	0.0285692	7.19111	2.06005	3.23113	0.0143553	2.85798	6.92659	4.60348	4.1177	1.80323	2.46467	5.33199	2.86394	3.33199	0.111031	4.68089	5.09508	4.83289	3.0635	4.80839	4.56621	6.8125	0	0.432959	0	3.18269	3.21101	7.00439	3.72137	3.77821	7.23161	2.40054	3.32481	3.46467	2.75275	4.13996	1.65076	6.38094	0.555816	3.62877	4.65019	1.26903	5.63343	6.90689	3.89433	6.12578	6.6359	6.42408
ACH-000842	5.01837	0	7.478	1.60881	3.09592	0.0703893	0.0285692	5.40667	3.11103	2.99095	1.76977	2.72247	5.67469	2.48543	0.422233	0.0285692	3.88753	4.42021	4.39985	2.24793	6.07831	5.02459	6.71012	0.226509	3.09085	0.782409	1.28096	4.15056	6.18864	3.49185	1.24489	6.71946	0.15056	0.238787	4.22728	3.31325	3.31325	1	4.15947	0.124328	4	5.01748	0.344828	1.03562	7.10339	1.5509	5.851	4.21257	7.75362
ACH-000898	4.83895	0	6.16772	3.09761	3.01792	0	0.201634	6.00854	6.13914	4.02237	2.16993	4.44294	4.90785	2.68706	0.790772	5.57168	4.98003	5.26078	5.45582	2.10769	5.33342	5.65992	7.41886	3.08746	4.01792	0.0840643	0.0143553	4.10769	6.94837	3.88362	0.594549	6.70764	0.356144	1.70929	6.95617	0.659925	3.81865	2.85	6.02192	3.17473	4.65592	6.56484	0.632268	0.0285692	7.57773	2.65306	5.488	1.37851	7.77873
ACH-000517	3.85599	0.111031	7.09624	2.29572	4.51096	0.565597	3.08066	5.28318	3.83491	4.27873	2.08066	3.87381	5.57137	1.20789	4.8339	0.15056	5.09043	5.76155	5.57289	3.05832	5.52168	4.41549	6.71301	0.687061	0.0565835	0.0143553	0	5.60199	7.03507	3.93734	0.0840643	7.00574	0.650765	2.5509	2.61589	1.77821	4.26379	2.46467	6.23802	5.50462	3.85997	5.80323	0.650765	2.7761	7.29186	2.12433	6.18448	5.52888	7.13627
ACH-001415	7.03375	0.137504	7.27594	2.67582	3.98459	0.111031	4.57833	5.23726	5.93168	4.19061	2.7845	3.97453	5.18349	4.21878	4.5404	0.111031	4.75275	5.69209	4.78816	4.02857	6.27854	5.5741	8.45668	1.19535	3.89918	0.0565835	0.0143553	4.16189	7.75215	3.79494	0.545968	7.94222	1.11103	1.40054	5.83491	4.44162	3.80735	3.67807	4.82324	5.42895	3.90977	5.48317	0.367371	1.18903	7.88923	2.37295	6.0881	2.75061	7.29893
ACH-000681	5.17632	0	6.31052	2.01792	4.05832	0	3.77294	5.93546	6.77768	3.74308	2.44626	2.41143	6.12267	0.807355	1.58496	0.0285692	4.33914	5.78005	4.79805	3.14078	5.73363	5.13217	7.56651	0.263034	0.0143553	0.0426443	2.84398	3.66789	7.61978	4.55704	0.137504	6.98003	0.757023	3.04089	0.516015	4.82069	3.74524	1.88753	6.32157	5.03034	4.51349	5.04264	0.85599	1.31615	6.35755	1.30451	6.72601	5.07296	7.27501
ACH-001310	5.34837	0	6.3194	2.38681	4.50398	0.0976108	4.3067	6.41109	3.98094	4.34625	3.32625	4.35896	5.48414	2.22033	3.02326	0	4.77294	5.8089	4.59156	3.11437	6.10538	6.36492	8.84423	0.0703893	0.0143553	0.0143553	0.713696	4.82731	7.54558	4.55213	0	7.13914	0.739848	0.214125	1.18269	4.03386	4.38198	1.73552	5.78555	6.78803	4.12516	6.24508	0.687061	1.59932	7.58361	2.28096	6.25039	6.04701	7.85773
ACH-000070	0.15056	0	5.44361	2.38405	4.37782	0.0426443	0.31034	0.356144	4.28318	5.3345	0.0426443	1.46989	6.02436	0.0565835	0.895303	0.0703893	3.50462	3.57531	4.22188	3.47119	5.06264	5.12433	5.55397	0	0.0703893	7.14149	2.17632	4.96394	5.42895	3.31615	0.0565835	5.93168	0.0143553	0.0840643	0.594549	0.124328	2.5008	1.7137	3.69822	0.367371	3.52231	6.98891	0.464668	3.774	7.22747	0.526069	5.91073	5.39472	8.03067
ACH-000484	3.13258	0	6.45779	2.28688	2.22651	0.189034	4.13668	5.01569	5.82858	4.79338	2.79909	3.69265	4.87086	1.40599	2.86394	0.275007	4.70708	5.19417	5.34056	3.41549	5.72356	5.4957	6.96417	0.0565835	0.389567	0.0143553	1.5656	3.39917	6.87344	3.77926	0.137504	6.11853	1.80323	0.773996	3.49825	4.46793	4.61765	3.7366	7.05115	9.61945	3.92884	6.34536	0.863938	0.545968	7.29536	1.58015	6.49265	4.28836	7.45121
ACH-000108	4.95187	0	5.93286	2.13422	2.68257	0	6.10434	5.9397	5.24641	3.61235	3.93074	4.49697	5.5509	3.5097	1.76553	0.0703893	3.84398	4.22882	4.08151	3.9486	6.32301	6.20574	2.78869	0.773996	0.0143553	1.03562	0.15056	4.22419	7.1236	4.19219	0	7.30524	1.25701	0.422233	5.11437	3.76129	4.55704	2.94111	7.94866	6.76911	3.95977	5.56316	0.62293	0.918386	6.4048	2.93357	5.54133	5.75809	7.79064
ACH-000808	4.16672	0	6.66661	2.22651	3.82375	0.0426443	6.56163	5.51128	3.09085	3.29131	2.13422	3.0018	6.73023	2.64386	6.28133	0.0285692	3.67694	5.05268	3.60288	2.52356	6.07296	5.24527	8.7501	0.0143553	0	0.0703893	2.27202	3.72356	7.65521	3.77505	0.111031	5.86617	0.250962	3.83794	0.344828	1.09761	3.87774	1.15704	5.48607	4.3067	3.09592	5.42089	0.286881	0.0703893	6.9822	4.74147	6.31524	7.06286	6.87467
ACH-000656	0.0840643	0	6.71301	2.35896	4.67016	0.0143553	0.15056	4.50462	4.6865	6.34713	2.08406	3.75061	5.77979	2.66676	0.0143553	0.0565835	3.87578	5.12433	4.8953	4.37921	4.75542	5.06738	0.925999	0.0143553	0.0285692	3.28244	0.713696	8.00848	5.2292	4.05832	0.0426443	6.7075	0.124328	0	1.84398	0.0976108	2.48543	1.80323	3.67582	0.344828	3.66903	6.62585	0.823749	0.0143553	7.57999	2.39232	6.22052	1.3505	8.17762
ACH-000166	0.0565835	0.0285692	5.44659	2.81147	3.69265	1.82782	5.11437	4.30961	5.07296	5.15987	1.9486	3.86096	5.72846	2.68032	0.941106	0.0143553	3.58856	5.28799	5.1375	3.21257	5.41886	5.6985	8.09069	0	0.0840643	0.0143553	0	4.50335	6.36475	3.86691	0.0426443	6.48961	0.0840643	0.0143553	4.87529	0.389567	5.35014	3.80941	5.73633	4.0063	4.25701	7.4353	0.887525	0.0285692	7.03815	1.17632	5.71672	8.40071	8.20711
ACH-000997	4.62702	0	6.75662	2.28096	4.58195	0	0.0840643	7.27929	4.69377	4.7761	3.07382	4.24565	5.78477	3.71699	2.41684	0.356144	4.4522	6.79559	4.76075	3.70708	5.42156	6.47816	7.75862	0.695994	0.0565835	0.895303	0.0143553	4.18745	7.15836	4.23496	0.411426	6.6094	0.773996	0.505891	5.2292	5.90785	3.96532	2.86196	5.66874	3.26604	4.26754	6.13011	0.613532	3.67243	7.45853	2.9222	6.12143	3.17632	8.47245
ACH-000866	5.8775	0.0565835	5.78895	3.42761	5.32733	0.0285692	1.37851	4.43962	5.46923	5.40054	3.14405	3.33628	5.32445	3.83592	3.23726	0.0143553	4.62994	5.26491	5.15299	3.904	6.69864	5.66221	7.16481	0.250962	0.0840643	0.0840643	0	4.20477	6.60585	4.07639	1.4489	6.41667	3.54844	2.36457	4.26679	5.11603	4.32409	0.263034	4.73118	0.526069	3.86295	7.37521	0.739848	2.17313	7.99961	2.70929	6.23802	5.71589	7.68025
ACH-000819	5.15906	0	6.53528	1.76129	3.73552	0.176323	3.83592	6.91636	6.70141	4.49121	0.15056	3.90689	5.92291	0.124328	2.90689	3.49825	5.1235	6.21742	5.65878	3.78136	6.36912	6.29884	8.62245	0.0143553	0.0426443	0.0565835	3.47119	5.3572	7.56598	4.2032	0	6.91325	0.0840643	2.41414	1.03562	3.80323	3.86394	2.0072	3.39369	6.2116	3.96993	7.19859	0.505891	2.78031	7.79714	3.49953	6.77307	7.33324	8.1092
ACH-000226	0.0285692	0	5.98094	3.77716	4.47573	0.0143553	6.93711	4.72192	4.07211	4.77716	3.77926	3.99095	5.86913	2.85599	0.263034	0.0426443	4.42694	5.2211	4.30889	4.07468	5.06005	6.32175	7.79662	0	0.201634	0.678072	1.65535	4.08151	6.40242	3.58376	0	6.46842	0.713696	3.79077	5.95396	1.17632	3.72356	0.15056	5.27873	0.0703893	4.01792	6.32823	4.40599	0.0285692	7.19761	1.26303	5.38301	0.298658	7.34864
ACH-000087	4.93782	0.0703893	5.86394	2.89336	4.90689	0.275007	2.23879	0.422233	4.42962	5.30561	1.51096	2.9279	5.52136	1.18903	3.41954	0.903038	4.50779	5.52763	5.15664	4.28021	5.70929	5.56651	9.03598	0.0840643	0.0976108	0.0565835	0.0143553	4.85798	5.50144	3.89433	2.28096	6.68384	4.38543	4.05224	0.31034	5.02281	4.34341	0.201634	4.83996	3.32769	3.74953	7.02547	0.903038	2.23573	7.67511	3.9982	5.9305	5.23496	8.18324
ACH-000340	4.05745	0	6.34997	2.12433	3.78031	0	4.98504	5.89821	3.4489	3.95606	2.87381	4.64097	4.64674	1.11103	3.70044	0.0143553	4.61294	4.95652	4.72356	3.32337	6.44012	5.88899	9.17503	0.163499	0	0.505891	1.26903	4.84449	8.03958	4.42492	0.0976108	6.31814	2.66903	0.378512	0.62293	0.815575	4.27873	0.823749	5.06091	6.86307	3.39917	6.39729	0.678072	0.0976108	7.44087	1.9222	6.21684	5.84147	7.4605
ACH-002005	4.53356	0	7.1811	2.27501	3.54473	0.0703893	0	4.5735	4.17712	3.52356	3.19535	1.7866	5.2075	0.0143553	0.443607	0.0840643	4.17393	5.88338	5.04876	3.17473	5.29572	6.20614	8.89039	0.0976108	0	0.0143553	0	6.79442	4.95791	4.06005	0	7.63619	0.333424	0.344828	1.31034	4.02148	3.66789	0.111031	4.30378	0.505891	4.45943	5.06695	0.485427	0.910733	7.45549	0.226509	6.36089	5.33235	9.16772
ACH-000758	4.65707	0.0285692	7.3733	3.32048	3.76129	0.163499	0	5.67412	5.74255	4.97499	3.82985	5.07468	4.80941	2.47249	0.933573	0.0143553	5.0054	5.34767	5.04483	3.34056	6.29536	6.99752	7.28244	0.815575	0.0143553	0.0565835	0.176323	4.81096	7.15127	4.36667	0.15056	7.10591	0.176323	2.82375	5.78529	3.37573	5.09043	0.773996	7.55467	0.722466	3.86987	5.47832	0.286881	0.286881	7.90821	1.26303	7.04144	4.31615	8.24779
ACH-000196	5.01525	0	6.34572	2.76977	4.02768	0.0703893	0.0703893	4.63227	5.62732	4.59096	2.11103	3.16832	4.75221	2.82375	1.79494	0	4.57046	5.66818	4.58976	4.22497	5.83668	5.62147	2.66903	0.903038	0.0285692	0.0703893	0.0143553	4.35544	5.19061	3.62761	0.0565835	4.92029	0.124328	5.65907	5.6642	5.15543	3.47249	0.0426443	4.66334	0.321928	4.41549	6.56818	0.344828	0.0976108	7.66505	1.45943	5.82273	4.20789	7.82826
ACH-000258	0.15056	0	5.99458	3.904	4.61471	0.201634	0.0285692	7.42492	4.38543	4.52857	2.52607	3.46597	4.58856	3.43429	2.01436	0.0565835	4.50716	6.52262	5.28096	2.98732	5.5472	4.0268	1.09085	0.739848	0.0565835	0.0840643	0.111031	6.65335	6.27333	3.93452	0	6.26454	0.0285692	3.30451	5.84725	5.43496	3.58976	0.0976108	3.43296	0.0565835	3.31759	6.74403	0.613532	0.879706	8.39086	2.66676	5.29866	5.77637	7.40718
ACH-000163	4.28836	0	6.54874	1.90689	3.62994	0.0703893	4.56438	6.20124	4.74201	4.49633	2.77189	4.1416	5.38094	1.33914	2.12102	0.475085	4.38336	4.67016	4.81609	3.9279	6.12453	5.52576	7.40965	0.0703893	0.0426443	0.0840643	3.30159	7.88441	7.18051	3.9644	0	6.72137	0.0565835	0.189034	2.20789	2.19219	4.24489	0.111031	4.24793	4.84097	3.55949	6.76195	0.536053	2.25399	7.21393	3.42492	6.5281	4.91265	7.63902
ACH-000076	0.238787	0	5.63575	2.28096	4.10601	0.0285692	5.62907	6.17612	5.45022	4.95838	1.5008	3.87676	5.51128	1.29278	0.298658	0.970854	4.22265	4.70099	4.99322	4.19219	4.2032	6.23113	6.56133	0.0565835	0.176323	0.0143553	0	4.84298	6.08385	3.29425	3.36317	6.99299	0.485427	0.0426443	4.774	0.475085	3.93546	3.31904	5.38232	5.66874	4.488	6.8254	0.773996	0.604071	5.70321	0.176323	5.66278	6.90725	7.72982
ACH-000509	0.15056	0	6.32805	3.01257	4.7366	5.29205	3.47897	4.16912	5.70708	4.54226	3.63691	5.24375	6.35067	3.20163	1.26903	0.263034	4.35755	4.58015	5.5744	4.47768	6.21626	6.81775	7.55612	0.0143553	0	0.124328	0.782409	4.90207	7.37086	4.97728	0.176323	7.22863	0.0285692	0.0285692	3.06005	0.238787	2.61117	2.59694	5.99277	1.52607	3.83289	7.20271	0.695994	0.0426443	7.35253	4.08916	6.6476	2.71809	8.65935
ACH-001193	4.04264	1.73118	6.32679	2.7866	5.03122	0	1.81558	0.176323	4.30305	4.90737	3.17313	4.38612	5.62059	3.51475	2.60881	2.5435	4.82171	5.8387	5.60999	4.56803	4.50462	5.86716	10.6924	0.0143553	0.15056	0.9855	0	3.87283	5.2604	4.52732	3.02326	6.5803	2.05311	4.22497	1.78241	3.34056	4.56438	1.70044	3.60881	3.1127	3.88655	6.9578	0.464668	3.34767	7.66832	2.96162	4.99095	4.7703	8.34536
ACH-000571	3.38128	0	6.65635	2.28983	3.72792	0.0703893	0.941106	5.60437	6.77939	4.55397	0.505891	4.35473	5.57198	0.0143553	2.75702	0.0143553	6.28059	5.1102	6.55949	3.31904	6.49121	6.12825	8.86814	0.823749	2.5008	0.0143553	3.77083	4.83289	7.73281	4.26903	0.275007	6.38647	0.0143553	3.99367	0.0426443	3.21257	4.21335	0.505891	4.49442	5.40054	3.78136	6.80929	0.604071	1.67356	7.51806	4.0268	6.74591	6.66888	7.74886
ACH-000391	4.43962	0.632268	5.62293	2.58015	3.83086	0.613532	1.18269	0.286881	4.32553	4.65363	1.63691	3.54844	5.42593	0.400538	3.69042	0.443607	4.22882	6.30433	4.48478	3.94298	6.13217	6.54643	9.40807	0.0143553	0.0565835	0.137504	0	4.01703	5.66391	4.79025	4.29499	6.36824	3.82782	2.13093	0.526069	4.92552	4.44427	0.275007	5.50875	5.39094	3.76553	5.67299	0.632268	0.137504	7.17622	1.05658	4.75221	4.42291	7.215
ACH-000293	4.86641	0	5.97269	1.31034	3.51602	0.124328	5.24907	5.49057	3.62994	3.35614	2.78031	4.09677	6.10392	3.22033	5.84021	0.722466	3.79909	6.23688	3.90785	2.01792	5.52607	5.58856	6.20789	0.0143553	0.111031	0.201634	0.713696	3.98823	7.64631	3.60763	0.0703893	5.94696	0.632268	1.26903	4.91265	4.29646	3.78241	1.03562	3.92505	0.687061	3.0072	4.86096	1.15704	1.28096	7.82413	2.0072	6.2149	4.0505	8.46553
ACH-000584	4.89821	0	6.8495	2.52105	3.94111	0.0703893	1.62293	4.8268	4.38681	3.67694	3.28688	4.74362	5.36912	3.20006	4.46009	4.89385	4.18745	6.10056	4.67976	3.78764	6.96081	5.55888	6.87713	0.526069	0.0565835	0.0976108	0.226509	3.46858	7.80665	3.89821	0.163499	6.32607	1.5656	1.3505	2.98914	6.72506	3.92029	2.69599	5.15097	0.678072	3.3978	5.64587	0.250962	0.356144	6.41886	1.7866	5.83491	6.37799	7.73559
ACH-001690	4.5008	0	6.93676	1.22651	2.9542	0.263034	3.99186	5.39678	4.50462	3.03914	2.1177	3.848	3.79494	0	3.05311	0	2.85798	3.75061	3.69822	1.70929	5.09212	3.73552	5.75195	1.31034	0.176323	0.565597	0.555816	4.15462	6.2363	3.20633	0	5.66676	1.1635	0.189034	0	1.23266	2.11103	1.78241	3.76235	4.488	2.33056	3.29719	0.0565835	0.367371	5.72465	0.475085	5.07425	1.9222	6.29333
ACH-000586	6.42576	0.485427	6.14893	4.18903	5.97842	0.124328	0.15056	5.00045	3.99548	5.43095	3.04264	4.25096	6.34767	3.74308	1.18903	0	4.78555	5.24982	5.17033	4.6605	5.93899	4.61353	6.92955	1.07724	0.137504	0.263034	1.01436	3.80012	6.32751	3.5472	1.98914	7.21004	4.86146	2.65076	6.0036	5.91025	4.43896	0.555816	4.926	0.454176	4.15299	7.63974	3.82171	0.62293	7.6664	4.33485	5.76898	4.7703	7.24098
ACH-000944	0.0840643	0	6.08279	2.82375	4.26153	4.65992	0.0426443	0.189034	4.53045	4.22419	1.64616	2.45943	5.7137	1.97085	1.18903	0	3.89045	5.76182	5.29866	3.7126	5.47249	6.92588	3.93074	0.214125	0.15056	0.0565835	0	5.80658	5.56834	3.94205	0.0703893	6.29811	0.0143553	0.0143553	3.09255	2.76553	3.20006	2.22033	3.53854	0.263034	4.44493	5.853	0.321928	0.0426443	7.5985	0.411426	6.25871	5.84449	8.23477
ACH-000561	5.1177	0	5.78947	3.2555	3.17951	0.0143553	0.124328	3.96809	8.23007	4.40803	4.44294	4.02414	4.40122	0.9855	5.0781	0.367371	4.66562	5.74039	5.77663	3.98641	5.32409	4.98732	7.79986	0.713696	0.137504	0.163499	0.650765	4.02945	5.9507	3.75596	0.0285692	6.8535	2.47768	0.565597	2.96532	3.6311	3.89724	2.29866	4.80941	0.941106	3.49057	5.76182	0.298658	0.137504	7.46565	1.56071	6.09445	3.93168	6.94052
ACH-001648	4.46532	0	6.10622	2.03562	2.18903	0.226509	4.01881	5.67582	7.38146	3.0072	3.53356	5.16511	3.76553	0	5.19771	0	4.18587	5.98982	3.96162	3.38957	5.91648	3.47249	7.17313	2.854	2.49057	0.0703893	0.0143553	2.68032	5.73335	3.2555	0	5.66021	0.963474	2.14078	0.545968	4.13914	2.80941	1.61824	5.43396	4.30086	3.58976	4.09592	0.454176	1.21412	7.42526	0.722466	5.5598	0.454176	6.97097
ACH-000394	3.1127	0.0565835	5.61941	3.20789	4.82782	0.15056	3.52607	4.4019	4.69544	4.95791	4.13832	5.52231	6.3411	3.77505	1.36737	0	4.75114	6.22207	5.37051	3.90207	6.44228	5.40531	5.71727	1.26303	0.238787	0.263034	0.0143553	4.30524	4.53605	5.41109	6.71012	6.21043	5.83137	1.07724	7.32139	5.57107	3.89045	0.163499	4.52482	0.250962	3.56438	5.95931	4.73118	2.9855	8.11416	4.02326	5.35544	6.73118	8.23678
ACH-000954	5.26791	0	6.49105	2.15704	4.0072	0.0426443	0.201634	6.98778	5.08194	4.25475	2.74631	3.77189	5.42794	3.57168	1.96347	0.0143553	4.58976	7.05441	4.70708	3.73118	6.32751	6.50985	7.31578	3.35191	0.432959	0.0565835	0	4.08236	8.25115	4.50906	0.0703893	7.05528	2.96162	2.90111	0.0285692	6.28836	4.06437	0.31034	5.82731	5.85823	3.87184	6.57137	0.495695	0.411426	7.68888	0.782409	7.2076	4.96116	8.44902
ACH-000204	0.238787	0	6.72955	4.07125	3.01436	0.0143553	0.226509	0.238787	5.01881	4.57592	1.68706	4.24489	5.32697	4.79181	0.0565835	0.176323	4.69988	5.67412	5.50938	2.93357	5.87995	6.91815	0.815575	0.344828	0.0285692	0.176323	1.05658	4.14078	4.35473	4.22033	0.111031	6.1809	1.66903	0.0285692	3.80219	2.61824	4.89772	5.24603	8.10753	0.226509	3.93168	6.73145	1.28688	0.0703893	7.95518	1.53605	6.33163	0.495695	6.98128
ACH-000160	3.51854	0	6.30579	1.5008	3.2555	0	1.89918	5.11603	3.29866	3.61706	3.16189	2.65764	5.22381	1.37851	1.81147	0	3.34483	5.49378	4.19377	3.40327	8.02885	5.72383	5.97269	0	0	0.0143553	3.68482	3.43696	6.3203	3.19219	0	6.25701	0.163499	3.95977	0.0285692	4.14812	3.99005	0.201634	4.54905	0.201634	3.73444	5.66391	0.475085	0.0565835	6.82082	3.45022	6.52888	0.275007	7.69794
ACH-000989	3.86592	0	6.0321	2.78869	3.9855	0	0.0143553	4.26003	4.82069	4.39643	2.88947	4.01525	4.70266	2.97085	0.214125	0.0840643	5.19259	7.52536	5.62732	4.488	5.74578	5.98687	7.94743	0.879706	1.27501	1.65535	0.333424	4.09339	6.85873	3.83086	0.214125	6.31488	2.4489	0.176323	6.31542	4.91648	4.15137	0.807355	3.89821	0.0285692	3.36737	7.06781	0.815575	0.0840643	8.29788	2.24489	6.21548	3.7148	6.96255
ACH-001347	3.97085	0	6.84725	2.52857	2.42761	0.124328	1.20789	6.05028	5.81352	3.7137	3.02857	5.16872	4.3067	0	5.1177	0	3.62761	4.5373	4.60229	2.80323	5.54751	4.86295	7.3175	0.895303	2.74631	0.613532	1.40054	3.43429	6.00293	3.55459	0	6.55628	1.20789	0.422233	0.226509	1.39506	2.51096	2.12433	5.59096	3.84398	3.05311	5.85375	0.526069	0.659925	7.58015	0.124328	5.62059	2.40327	6.6241
ACH-000691	4.19061	0	6.77426	2.7761	3.74093	0.0143553	0.111031	4.71754	4.74739	5.30816	2.65764	3.37573	5.66704	2.93734	4.36877	0	3.77505	2.74846	4.49249	3.38819	5.97039	5.79077	6.28318	0.454176	0.333424	0.111031	0	3.30305	6.00921	3.03562	4.62	5.59515	1.62293	2.9241	4.64962	5.93664	2.79077	0.15056	3.97728	0.163499	3.49185	6.47135	0.565597	3.19535	7.1637	0.422233	5.852	3.44493	7.9414
ACH-000268	5.83264	0	5.95699	2.75702	3.3799	0.0565835	0.0976108	5.35368	6.98413	3.97177	1.68257	3.32481	6.21043	1.28688	1.67356	4.09339	3.98914	6.49809	4.92884	3.12433	4.42895	5.25399	6.1532	0.925999	6.06781	0.214125	0	3.98459	6.57939	3.51728	1.95233	6.73931	0.226509	0.704872	5.25437	3.3978	3.81967	2.30743	4.71589	3.44758	3.99095	6.17852	0.505891	1.5509	7.63546	3.0197	6.27575	4.56133	7.56544
ACH-000119	3.79494	0	6.31488	2.10769	3.37851	0	5.02813	6.34501	3.99095	4.10014	3.09085	5.92624	4.46074	0.137504	3.59813	0	4.79649	5.43196	4.66789	3.40735	6.38491	6.09085	9.93241	0.111031	0	0.505891	0.0143553	5.85325	8.65846	4.39094	0	6.29407	2.25096	0.298658	0.275007	0.263034	4.31325	0.823749	5.18031	7.50502	3.51728	6.1035	0.757023	1.88753	7.43679	1.85997	6.04963	7.42911	7.29057
ACH-000379	5.80271	0	6.59425	3.49825	4.57954	0.0285692	5.33271	6.57471	7.38137	5.00225	2.62994	4.87381	4.69265	4.30159	4.42895	0.124328	4.59872	6.4348	5.20281	3.10936	6.27482	6.37608	1.8953	3.04789	0	0.333424	0	4.89433	8.27952	4.10014	0.0703893	6.05441	3.48285	1.47508	5.63285	5.80864	3.52857	2.57289	4.78084	2.88753	3.41143	6.35878	0.214125	0.0285692	7.71644	1.24489	6.23802	4.72465	7.53924
ACH-001341	5.65735	0	7.53138	1.93734	3.5373	0.0143553	0.333424	6.28559	5.07382	4.23879	2.33056	4.8268	5.24679	3.39369	4.80168	0	4.23649	5.96924	4.47444	2.83188	5.88142	5.49601	7.91672	0.0143553	0	0.0143553	0	4.02857	7.28623	4.1375	0.0143553	7.30506	2.51602	1.07039	2.5509	1.79077	3.63691	3.42223	5.20594	0.124328	2.72028	4.68594	0.505891	2.08746	7.43171	1.56071	5.34127	4.58316	7.41794
ACH-000714	0.137504	0	6.45697	3.25852	5.34767	0.0143553	0.226509	4.48285	5.36702	4.58616	2.22651	4.41414	6.25682	3.5509	0.111031	0.739848	4.67694	5.56925	5.46956	3.96717	5.74255	6.57107	5.47444	0.15056	0.0426443	0.111031	1.03562	4.33485	6.6737	4.09424	0	6.80941	1.22033	0.0976108	3.76553	2.41414	4.25626	4.20398	6.84122	0.0285692	3.71149	6.21276	0.823749	2.15056	7.26463	2.95233	6.65721	6.20809	7.72914
ACH-000937	3.33914	0	5.67666	3.09424	5.43363	1.58015	0.163499	0.641546	3.99458	5.8627	1.98185	4.56133	5.66903	3.01436	2.34483	0.933573	4.84649	2.56071	5.41041	4.42291	5.36492	4.52544	9.63719	0.176323	0.124328	0.0426443	0.0426443	4.51033	6.56468	3.70929	0.0840643	6.95722	1.79077	1.74416	2.42492	0.176323	3.76129	3.50589	4.83845	4.31034	3.84499	7.68194	0.9855	0.0426443	7.26679	2.7137	5.47021	5.07296	7.35473
ACH-000763	0.176323	0	6.65893	3.17632	5.11437	0.0976108	0.201634	3.63691	4.21023	4.55949	1.9782	4.72465	6.00315	2.15056	0.163499	0.31034	4.26978	5.80581	4.73335	2.852	6.24031	6.80723	5.35262	0.895303	0.286881	0.201634	1.36737	3.95606	6.46793	4.24565	0.0426443	7.08651	0.124328	0	3.13586	0.871844	3.55582	5.72846	5.5744	0.111031	3.73335	6.31596	1.0072	0.604071	7.84417	2.28983	6.39643	2.98368	7.47346
ACH-001673	4.04002	0	6.79338	2.62059	4.07468	0.0285692	3.11936	6.00585	5.09339	3.55582	1.91073	2.65535	4.04352	1.98185	2.51854	0	4.18903	6.99718	4.45418	3.63227	4.55213	5.69181	6.70874	0.85599	0.31034	0	3.24031	3.02503	7.26501	4.02326	0	7.21616	0.0285692	3.34767	4.55949	1.82782	2.68482	2.36737	6.53885	0.432959	3.61706	4.8885	0.400538	5.57894	6.3766	2.04264	6.17293	4.72192	7.36212
ACH-000326	0.584963	0	6.02104	2.37295	3.16672	1.10434	3.11603	5.22188	4.79857	4.15381	1.63227	2.80735	5.76898	3.04963	0.807355	1.15704	3.76871	4.53481	4.84499	3.8885	4.64443	5.46923	6.34359	0.0426443	0.0426443	0.111031	0.757023	6.24184	5.99977	3.94017	0.0565835	6.78529	1.86394	0.0285692	4.36177	1.4489	3.78555	3.35755	7.30469	2.5656	3.30597	6.62264	0.536053	0.0285692	6.30597	2.02503	5.58225	4.94579	8.94278
ACH-000300	4.64731	0	6.19456	2.53107	4.57168	0.0285692	5.6279	6.22766	5.16672	3.56925	3.56194	4.61765	6.19889	3.02857	5.31832	0.0565835	3.66903	6.95198	4.87823	2.89724	5.97865	5.57954	7.03045	0.31034	0.0426443	0.15056	3.09761	4.32481	7.00484	3.38405	0	6.3906	2.25399	3.24489	2.27202	3.15866	4.55888	0.918386	7.19229	5.66988	3.84699	5.74497	0.887525	3.02503	7.20936	1.66903	7.01502	6.59529	7.58796
ACH-000901	4.01614	0	6.55536	2.03562	3.99186	0.0426443	0.659925	2.26604	3.9607	4.79338	2.81352	4.07639	5.01659	0.111031	1.17632	0.137504	4.06264	5.10894	5.06048	3.70266	6.04571	5.7703	7.44012	0	0.0285692	0.250962	0.757023	7.43329	7.10601	4.06523	0.15056	7.30067	0.443607	0.31034	1.03562	2.80735	4.64616	0.782409	6.65392	8.35509	3.56071	5.94298	0.333424	0.773996	6.68032	2.05658	5.72028	2.26003	7.78365
ACH-000816	5.17552	0	6.18329	2.12433	3.83491	0.0703893	0.111031	4.78764	4.35262	3.80632	2.02503	3.7939	6.53496	2.88753	2.31325	0.15056	3.46597	5.67356	5.18388	3.63807	5.14771	5.70044	5.22689	0.298658	0.163499	0.111031	0	3.95513	3.75809	3.93168	1.09085	6.11374	3.74201	2.1375	1.59455	4.78921	3.51223	0.0143553	0.505891	0.0840643	4.11103	5.4957	3.47119	3.26454	6.91767	5.28651	7.55213	3.43563	8.07719
ACH-000641	0.286881	0	5.55643	2.99458	4.47768	2.90304	6.5818	5.43396	4.9855	5.48864	2.30451	4.32984	5.7057	2.81352	0.790772	1.09761	3.8166	5.91409	5.75382	4.76871	4.15623	5.95699	7.54179	0.124328	0.0285692	0.0143553	0	4.7339	6.80168	3.73552	0	7.66406	0.111031	0.536053	4.89385	0.505891	5.50494	4.29719	6.24812	5.19338	4.0268	7.14568	0.970854	0.0285692	6.63503	0.275007	5.56803	6.71809	8.44357
ACH-000511	4.88362	0	6.74012	2.39506	4.67694	0	4.69377	6.87566	1.79909	4.76022	4.12763	5.94228	6.02015	1.07724	4.33628	0.201634	5.30524	5.56133	5.16832	3.853	6.25191	6.24394	7.87762	1.40054	0.0285692	1.48027	0.757023	4.36947	7.9377	4.63285	0.163499	7.38862	0.137504	2.11437	0.584963	1.58496	4.56499	2.30743	5.61029	7.42735	3.94017	5.7046	0.485427	1.72683	7.06458	1.47508	6.90725	4.45352	7.76454
ACH-000583	0.0285692	0	6.04264	2.71589	4.57107	4.47768	0.0703893	0.214125	3.46858	4.63865	2.45943	3.46205	5.74631	2.0321	0.0565835	0	3.35755	5.0018	4.36036	3.30743	5.38957	6.21975	5.65507	0	0.0143553	0.0976108	0.0143553	4.13093	5.68762	5.06523	0	5.99932	0	0.0143553	2.96162	0.124328	2.22959	0.0426443	5.90737	0.111031	4.22651	6.50589	0.176323	0.0285692	7.1335	2.70708	6.14139	0.485427	8.14944
ACH-000836	4.63227	0	6.70418	2.79286	4.0798	0.0976108	1.15056	5.72955	4.80219	4.37226	3.15704	4.25701	5.50239	0.0840643	3.70487	0.0703893	4.14078	5.73769	4.91121	3.38957	6.65935	5.8775	6.58406	3.15381	0.15056	0.422233	0.0143553	5.17193	7.33199	3.67243	0.0565835	6.99039	1.76553	1.88753	0.722466	2.52607	3.83794	2.01078	3.26153	1.26903	4.62644	4.9241	0.422233	0.85599	6.606	1.3505	5.8999	3.8885	7.64501
ACH-000975	4.06005	0	7.14384	2.09085	4.55827	0.163499	0.545968	6.14731	4.37782	4.67751	2.1375	3.25399	5.22689	1.0072	3.39369	0.0143553	4.84298	5.29902	5.24717	2.95233	4.92647	6.90917	7.21839	0	0.0143553	0.137504	1.96347	3.7137	6.9535	4.09508	0.124328	5.97568	0.176323	3.19219	0.970854	3.70155	4.0036	1.9782	5.09339	0.111031	3.98641	6.94486	0.970854	1.42761	6.94404	1.39506	6.56712	4.74846	7.27994
ACH-000109	8.81426	1.53107	6.4933	2.65992	4.30961	0.0143553	6.40531	6.43929	7.37816	5.0268	2.73118	4.40531	4.43962	4.23189	2.15056	0.356144	5.63081	7.49673	6.28003	3.30012	5.31578	5.374	8.59036	2.14405	1.14405	0.400538	0.0565835	4.85848	7.43896	3.58015	0.0565835	6.97888	2.03562	1.89918	5.80761	4.54411	4.32481	3.42895	6.15765	5.06264	3.98277	6.07275	0.356144	0.687061	8.44754	0.970854	6.24812	5.51916	7.5741
ACH-000467	5.08066	0.321928	6.25984	2.61353	3.34056	0.0143553	0.0426443	4.86295	4.87627	4.85898	1.81967	3.94953	5.43563	3.10266	1.65992	5.97177	3.5741	5.67101	4.6241	3.46336	4.39712	5.14119	6.89651	1.89142	3.99277	0.0703893	0	3.42761	6.57122	3.14731	3.34767	6.44344	0.367371	0.0285692	5.48543	3.904	2.43296	2.14731	4.72083	0.443607	3.76447	6.62147	0.356144	0.0285692	7.17193	1.01436	5.44791	1.56071	7.50985
ACH-000712	2.10769	0	5.69683	2.31615	3.45418	0.0703893	0.189034	5.26641	4.82883	4.1375	4.16027	4.83996	4.30597	3.37295	4.76288	0.163499	4.01436	6.32643	4.59156	3.8339	6.27966	5.67412	7.62256	3.68145	0.201634	0.321928	0	5.26379	7.07286	4.33485	0.895303	6.91612	0.0426443	3.47897	7.39635	6.07916	4.61765	0.0565835	4.45352	0.400538	2.94486	6.37138	4.72028	5.88411	8.14098	3.87283	5.67835	7.01223	8.0955
ACH-000671	5.43263	1.21412	6.64559	2.15056	4.13011	0	0.0703893	6.14853	4.96855	3.74308	1.926	2.4957	4.56133	0.0143553	3.0197	3.07895	3.45549	6.02967	4.68706	3.66448	4.5509	5.22304	8.62088	0.263034	0.0840643	0.0840643	0.389567	4.54659	5.3799	2.74846	0.15056	6.61574	0.0285692	1.9486	4.88947	4.88753	3.35473	2.09085	4.51538	3.16511	3.55336	6.11977	0.250962	2.88557	6.89166	1.70929	5.71617	5.34696	8.20237
ACH-000523	5.59604	0	6.2211	2.83188	4.79857	0.367371	0.0285692	2.77821	5.69961	5.35544	3.05485	3.69377	5.79051	2.68706	1.41143	0	4.60822	5.87332	5.44162	4.45681	6.5292	5.38785	4.77768	0.238787	0.111031	0.0703893	0.0143553	4.87431	6.01703	4.97728	3.89045	6.49474	4.20789	2.3978	4.22188	6.02879	4.36107	0.137504	3.95977	0.286881	4.35896	6.92908	3.38128	0.992768	8.29581	5.81839	6.43663	4.42223	7.23036
ACH-000864	2.73552	0	5.58105	2.74846	3.57046	0.0426443	0.0976108	4.8125	4.74578	4.88899	3.69153	4.26828	5.38991	1.15704	5.65449	0.0285692	3.89142	6.05028	4.79338	3.34341	6.57289	4.86888	6.64789	0.0143553	0.137504	0.0565835	0.0143553	4.74416	5.32337	3.94767	0.344828	5.7412	2.21412	0.505891	4.50716	5.91217	4.02326	0.0565835	3.58856	0.201634	3.1375	6.32283	0.863938	2.27501	7.90923	4.47444	6.21374	5.97957	7.40071
ACH-000726	5.09424	0	6.78555	3.25096	4.27873	0.0285692	4.76924	6.57924	8.22501	3.7939	2.95977	4.17153	5.31143	0.137504	4.21412	0.0565835	4.63517	5.40667	5.62907	3.05658	6.68117	5.47865	6.36929	2.83996	3.03914	0.226509	1.61824	4.24793	5.5435	3.39643	1.9222	6.31034	3.21878	2.46728	4.34483	2.38957	3.71809	2.0321	4.32121	4.51791	3.71809	5.3147	0.963474	1.81147	6.82286	0.650765	6.09487	4.48543	6.94087
ACH-000136	4.47573	0	5.73715	2.7137	4.0505	0.0285692	0.15056	0.422233	5.33235	5.07382	0.201634	1.65535	5.50716	0.263034	3.46336	0.0285692	4.13422	4.87332	4.98368	3.52231	5.21684	5.13873	1.15056	0.669027	0.400538	0.0285692	1.48543	3.07382	5.22304	4.51602	0.659925	6.62322	6.40259	0.124328	8.11655	5.58856	4.71644	0.0426443	0.454176	0.389567	4.54411	6.99175	2.79494	3.17473	8.14822	4.82222	5.79961	3.57652	6.37591
ACH-002067	4.12267	0.226509	6.06953	2.69377	4.44095	1.28096	0.0143553	5.8382	5.07211	4.86542	2.49825	3.8339	3.6017	3.79494	2.18269	0	3.28096	5.69488	4.13586	1.11103	4.1643	5.55244	7.02724	0	0.536053	0.0285692	2.64616	4.37504	5.16551	4.71973	0.948601	6.57137	3.24031	0.704872	3.09085	3.20006	3.76447	1.0635	4.0993	1.44361	3.26454	5.35826	0.356144	1.28688	6.21004	0.948601	5.39643	3.83996	8.07494
ACH-000440	0.111031	0	6.07425	3.98185	4.12102	5.07125	0.0426443	1.17632	5.17513	3.98732	3.31034	4.26454	5.28503	2.75275	0.485427	0.0285692	4.58015	4.29793	6.05289	4.21645	4.69098	5.17513	5.00899	0.0840643	0.111031	0.163499	0	7.33807	5.38543	4.25475	0.275007	6.11249	0.124328	0.111031	0.659925	0.454176	2.59932	1.04963	5.03298	0.0565835	3.77926	7.61912	0.83996	0.0285692	7.04832	2.82375	6.28225	3.70598	7.66952
ACH-001461	6.23955	2.85	5.96162	1.66448	2.67129	0	0.0426443	5.52262	3.88655	2.74416	1.04264	2.04264	5.46989	2.09424	0.526069	5.6907	2.68257	5.42526	3.33485	1.80323	4.14241	4.1152	5.65793	1.24489	5.81532	0.0565835	0.0976108	3.20789	5.38957	2.57773	2.62994	6.17792	0.0565835	0.0143553	4.67751	3.08236	1.86394	1.74416	2.74416	0.432959	3.49953	4.06005	0.298658	0.0143553	7.6837	1.07039	5.4793	0.411426	7.20945
ACH-000890	3.30159	0	7.03903	1.79494	3.38543	0.0285692	1.13093	5.99073	4.38474	4.67807	2.46205	4.30961	6.42257	2.89918	1	0.0143553	4.39917	4.16672	5.25927	3.82171	5.85699	6.13791	6.23093	0.238787	0.0703893	1.04264	0.0565835	5.29131	8.06124	4.03298	0	7.59193	0.15056	0.333424	4.19535	3.28244	5.17552	0.0976108	6.28651	1.4489	4.02237	6.1631	0.201634	0.555816	7.21004	1.36737	6.72697	4.04527	8.12505
ACH-001692	1.3505	0	7.06437	1.60407	2.47508	0.0840643	2.29866	4.20163	5.19298	3.926	2.06005	3.03914	4.67356	0	3.6792	0	3.41143	5.03562	3.73552	1.1635	5.60199	7.35773	7.26903	0.85599	0.111031	0.485427	0.0426443	3.91839	5.95373	4.17632	0	6.24793	2.66903	2.20477	0	1.34483	2.62994	2.03562	4.62644	0	2.79494	4.48285	0.31034	0	7.65728	0.604071	5.78319	1.45418	7.48269
ACH-000027	4.43696	0	6.03122	2.58015	3.10266	0.0285692	3.55827	5.05268	4.53045	4.10014	2.21723	4.09339	5.24755	2.49825	6.4065	0.226509	5.16712	4.393	5.50271	4.25248	6.90881	6.35949	9.26327	3.12267	0.163499	0.298658	0.757023	4.83693	7.07948	3.91743	0.286881	6.41532	3.46989	3.23879	2.43563	4.75435	4.5656	1.20789	5.68201	3.11603	3.90689	7.31759	0.536053	0.713696	8.23941	4.1643	6.6175	6.95641	6.26153
ACH-000562	4.8515	0.659925	6.19259	2.68257	4.37086	0.111031	4.90881	5.83162	5.41718	4.38128	2.0321	4.32625	5.2902	2.76129	0.659925	0.0143553	4.20163	4.60644	4.54782	3.25701	5.62556	5.44526	8.17747	2.66903	2.16027	0.214125	0.555816	3.98368	7.03595	3.33771	0.933573	6.20124	2.02148	0.411426	4.96116	4.97728	2.79909	2.73552	7.26679	4.69265	3.95513	6.00045	1.09761	0.286881	7.41185	2.01078	5.97315	3.76129	7.30204
ACH-000748	3.99005	0	6.36089	2.5509	4.38336	0.0565835	5.98732	5.26828	5.45878	4.62293	4.0009	4.77294	5.68201	2.94673	0.286881	0.15056	4.41007	4.76607	5.2555	3.61353	6.4348	5.34731	9.40858	0.111031	0	0.0285692	2.59932	4.12928	7.53636	4.67976	0	6.95093	3.22497	0.189034	0.111031	1.60881	4.60348	1.05658	6.07339	6.09824	4.29131	7.08587	1.07724	2.63459	7.14139	3.28983	6.2149	6.72928	7.60392
ACH-000834	6.26885	0	7.08895	1.99277	2.53107	0.0285692	2.98732	5.4522	4.97636	3.72356	2.56803	4.47768	4.29793	0.367371	5.61412	0.226509	3.85499	5.48575	3.85997	3.02857	5.38888	5.46238	5.94953	3.96809	0.604071	0.443607	0.15056	3.74739	7.22207	3.74631	0.226509	6.61162	2.17951	1.65535	3.42626	1.80323	2.97636	2.4489	3.60407	5.47541	3.54102	5.10266	0.422233	0.799087	7.26931	0.641546	5.61824	3.50843	7.39189
ACH-000565	5.57198	0.0426443	6.20516	2.23266	2.29866	0.641546	0.214125	5.81839	5.16993	4.16752	2.12102	3.64616	5.05572	2.58496	4.26754	1.83188	4.22497	5.57773	4.70819	3.42761	4.55704	5.40599	4.2555	1.29278	5.59006	0.669027	0	5.25512	6.70307	3.23113	7.69905	6.24603	0.565597	0.555816	5.76155	3.52732	3.75489	2.56316	6.75181	2.83996	3.80735	6.44029	0.250962	0.0426443	7.12236	2.1635	5.74927	5.00764	7.39215
ACH-000449	3.63575	0	6.34873	1.95606	2.926	0.0840643	4.11853	5.58045	5.68958	3.8679	2.40871	3.83491	5.84649	0.0143553	1.87971	0	4.44427	4.26078	5.09001	4.23955	5.64875	6.29131	9.48856	0	0.111031	0.0285692	0	2.52607	6.69237	3.73118	0.0285692	6.08598	0.344828	0.163499	0.815575	2.69822	3.44095	1.85997	4.78503	0.124328	4.23649	6.67737	0.526069	2.67807	5.98345	1.29278	6.2878	5.52262	7.86326
ACH-000399	2.33914	0	6.11645	2.87774	4.49121	0.505891	0.0426443	6.79961	6.22323	4.93734	3.58496	5.06566	5.27277	4.79025	3.26454	0.286881	6.13525	7.38137	6.38353	3.56925	6.4121	5.92505	5.64357	2.98914	0.214125	0.163499	0	3.98185	5.44791	4.31252	2.95047	6.32067	0.124328	1.72247	6.67228	4.1235	4.25701	0.367371	5.26566	0.286881	3.84097	6.30889	4.8885	3.46336	8.1177	3.64501	5.17991	5.73985	7.5472
ACH-000770	0.124328	0	6.19239	2.70929	3.89433	4.38059	0.0703893	6.30177	5.23381	4.76075	2.82171	4.75275	5.81583	1.40599	2.21101	0.0143553	3.69042	5.82706	5.23189	4.09255	4.65363	6.18725	8.51523	0	0.0565835	0.0703893	0.632268	4.35332	7.03628	4.87774	0	7.59305	1.96717	0.0143553	0.555816	1.27501	3.52105	3.44228	5.37121	0.0976108	4.27202	7.44551	2.9486	0.0285692	7.2078	1.58976	6.31179	5.23074	9.0235
ACH-000710	0.111031	0	6.38059	2.5008	2.62761	0.0143553	0.0840643	5.58376	5.61029	4.87529	2.61117	5.02059	4.37226	2.44626	3.87578	0.0703893	3.97453	6.23381	4.77083	3.0054	4.20163	4.55643	6.94825	2.56803	6.61515	0.0703893	0	5.40633	7.49169	4.19377	7.95228	5.88338	0.0565835	0.250962	7.01926	4.86245	4.49889	0.111031	4.46989	4.80787	3.39506	5.75889	0.367371	0.163499	7.79012	3.46467	5.72137	8.07387	7.53846
ACH-000507	5.41886	0	6.6532	2.98732	3.67469	0.0565835	0.739848	5.20711	7.1057	3.93452	2.19849	4.09339	4.34483	2.61824	4.41616	1.50589	4.4957	5.52388	5.42089	3.94486	5.33842	5.69822	3.84499	1.83188	5.63314	0.0976108	0	3.33485	6.46777	3.66107	0.604071	6.67228	0.0840643	0.0565835	5.07211	3.22959	4.32409	2.88947	4.41481	5.15137	4.0993	6.02015	0.641546	1.65535	7.56117	0.62293	6.55964	0.124328	7.76951
ACH-000066	5.75382	0	5.51444	2.53605	4.56621	0.0143553	3.88166	6.06242	5.91695	3.80323	2.83592	5.18309	4.85997	1.02148	3.04089	0.0143553	4.53045	5.75622	4.74147	3.38405	5.5659	7.20692	6.67864	2.86196	1.04264	0.15056	0.189034	4.87431	7.88087	3.6427	1.54597	6.89373	2.02148	0.298658	6.83681	4.48736	3.48285	3.34056	5.64357	4.765	4.00809	5.70846	0.31034	0.0703893	7.17891	2.19535	6.37434	6.02791	7.57206
ACH-000022	4.20789	0	6.36999	2.73769	3.04789	0.0143553	0.0976108	5.79883	5.4353	4.58075	2.08066	3.55827	4.09845	1.97453	1.58015	0.0976108	4.18507	6.86629	5.14771	2.86987	5.75942	5.50271	3.60763	1.71809	3.37295	0.0703893	0.0143553	2.91265	6.40871	2.89142	5.27165	5.77742	0.15056	2.55336	6.26547	5.2555	3.12928	1.95233	5.3799	4.80116	3.22497	6.34074	0.286881	3.9241	7.79649	3.70929	6.67073	3.72574	7.12474
ACH-001668	5.29976	2.82782	4.90689	1.91456	3.21568	0.0426443	0	3.76871	3.56316	3.41684	1.88362	2.51602	5.62469	1.22651	2.0072	0.189034	3.91456	3.55582	3.88947	3.67807	2.56316	3.27202	4.94953	0.0143553	0	0.0565835	0.485427	5.03298	5.59634	3.06178	0.0840643	8.05077	1.60881	0.250962	3.5008	2.83794	3.28244	1.62293	3.80219	3.07382	5.21801	5.50208	1.07039	1.51096	7.42786	0.214125	5.15704	4.22342	5.77189
ACH-000334	0.286881	0	6.60896	2.9486	5.53169	0.176323	0.0143553	1.72683	5.1807	5.29646	2.76765	4.2426	6.13093	0.0285692	0.695994	0	5.13175	5.9148	5.9798	4.06695	5.72274	6.60006	2.75702	0	0.0285692	0.15056	0	5.0505	6.50684	4.09001	0.0840643	6.05528	0.0285692	0.0143553	0.0976108	0.0285692	1.76129	0.124328	4.94439	0.0143553	4.54288	6.05983	0.970854	0.0426443	7.25011	4.61941	6.45401	0.903038	7.77525
ACH-000374	5.89069	0	6.1815	3.17792	4.66789	0.0426443	0.422233	6.55397	5.1469	5.34589	2.94486	3.28836	6.16289	3.3147	2.94111	0.0285692	3.34767	5.21607	3.51223	4.56316	5.00585	6.0974	4.42021	1.35614	0.0565835	0.422233	1.31615	4.22882	6.4822	4.08491	0.378512	6.57289	0.895303	1.48543	4.5552	4.36877	4.13504	2.59216	5.3733	0.321928	4.05485	5.79753	0.765535	0.163499	6.20574	1.69153	5.86047	5.36387	7.0993
ACH-000519	0.111031	0	6.1206	2.18587	5.12763	0.137504	4.37782	2.49825	4.94813	5.11478	0.0285692	1.91073	6.1418	2.24184	1.24489	1.5008	4.68594	4.96671	5.80916	3.63807	5.31759	4.17473	9.4092	0.0285692	0.0703893	0.0285692	0.0143553	9.29804	6.14527	3.76553	0.0703893	6.70653	0.137504	0	4.14078	3.55949	3.99729	4.61589	4.62819	5.79727	4.30232	6.38215	0.713696	0.0426443	7.59768	1.03562	6.38905	2.80529	7.69167
ACH-000908	2.59455	0	5.46074	2.30451	2.51854	0.0143553	0.0285692	7.44419	5.17832	4.88313	2.95047	4.31832	4.80064	1.85599	2.15704	4.15543	4.77083	8.59634	5.6792	3.02326	7.16842	6.51696	2.0036	3.32625	0.0426443	0.15056	0	4.84147	7.17523	3.92315	0.0840643	6.31596	4.18903	1.48027	5.96023	4.37573	4.19928	2.852	5.08789	0.111031	3.65191	6.27631	0.695994	0.0426443	8.05327	3.33199	6.19338	1.96717	7.95838
ACH-002003	3.51475	0	7.4138	2.90881	3.62176	0.0143553	0.475085	4.55582	4.14893	3.69153	2.84197	5.69209	4.9607	0.863938	1.43829	0	4.57289	5.45088	5.14078	2.60644	5.37955	5.97315	4.13832	0.226509	0	0.163499	2.24793	3.11936	5.48027	3.58736	0	7.03287	1.45943	0.31034	3.71039	4.55029	3.05137	1.67356	3.0268	1.65992	4.51475	4.84449	0.275007	2.14405	7.2484	2.852	6.32301	3.66562	8.03535
ACH-000574	5.93286	0.604071	6.68734	1.95977	3.89627	0.0285692	0.163499	5.04701	4.30159	4.52105	2.28983	3.60051	5.96371	2.79077	6.51317	0.389567	3.35755	4.60466	3.95327	3.5097	6.06717	5.06091	6.46123	0.163499	0	0.0143553	0.0285692	3.50843	7.48099	3.65878	0.163499	6.95687	0.111031	0.378512	1.13093	4.46271	2.94111	2.23879	4	2.61824	4.12267	6.52136	1.41143	2.01792	7.18239	0.545968	5.66562	5.29609	7.39832
ACH-000148	2.9222	0	6.00405	1.70044	2.61824	0.189034	5.88582	6.49394	4.41549	4.62585	3.49313	5.63981	4.19692	0.443607	2.19849	0.0285692	5.15015	6.51396	4.31759	3.38128	5.97131	4.89724	9.22248	0.0285692	0	0.0565835	1.61353	6.23189	7.04723	4.05224	0.176323	5.6314	0.137504	1.74846	0.111031	2.78869	4.38474	0.978196	6.07639	8.33217	3.44626	6.5489	0.790772	2.63459	7.37278	4.39712	5.89966	7.13566	8.10758
ACH-002461	4.5404	0	6.67892	2.08066	3.50462	0.0143553	1.25701	5.89554	2.52105	3.69377	2.81352	5.38612	4.90448	0	1.05658	0.137504	4.4489	6.07082	4.52042	3.18428	5.85922	5.54566	7.91648	0.0143553	0.111031	0.333424	2.66903	6.64357	6.72383	2.98003	0	6.4694	1.7137	2.58015	0.823749	2.56316	4.64386	2.17313	4.849	6.05028	2.98914	6.23879	0.748461	1.22033	7.15654	2.96532	5.64962	1.94486	7.08587
ACH-000646	3.66562	0	5.96694	1.03562	1.51096	0.0285692	0.0565835	5.24222	2.34483	2.96162	1.02857	2.55582	3.2555	0.871844	1.81558	0.137504	2.76341	3.32912	3.36737	3.45681	4.59872	4.27426	2.42761	1.5656	0.163499	0.0426443	0.731183	4.72247	4.80684	2.81762	0.0285692	5.37712	3.98641	0.214125	3.08576	2.09761	1.97085	1.18903	4.37226	0.910733	5.18666	6.04985	3.13914	5.37086	5.74873	1.20789	4.2891	6.93369	5.87627
ACH-000314	4.55336	0	6.52058	2.31325	3.97728	0.0285692	0.286881	5.84046	3.9607	4.26003	3.09761	3.67582	6.77268	2.68482	4.08406	0.0143553	4.64328	4.95791	4.60822	3.15381	6.6372	5.79312	7.44576	0.0143553	0.0285692	0.0426443	1.31615	4.92979	7.07756	4.67186	0.189034	6.79559	0.0976108	0.124328	3.73985	4.34625	3.62176	1.69153	5.79546	6.98812	3.96809	5.43029	0.321928	0.0143553	7.79292	1.13093	5.60585	4.23036	8.24722
ACH-000040	3.80426	0	6.40854	2.04264	4.03474	0.263034	5.39883	7.40352	3.19849	4.72356	3.83693	5.62264	4.72683	1.82375	4.44029	2.4489	5.3726	5.9222	5.49985	4.7447	6.88374	5.87627	8.41705	0.695994	0	0.594549	3.97361	5.0635	6.86629	3.7866	0.0565835	7.39343	3.17153	1.63227	0.400538	2.79286	4.58195	1.41143	4.87381	6.02348	3.70929	7.08979	0.799087	0.0285692	7.30807	3.94017	6.83996	1.80735	7.45869
ACH-001057	0.0840643	0	5.72083	3.60881	4.53667	2.19849	7.07991	3.11103	4.48091	4.38336	1.33342	4.0027	4.99141	2.29866	1.3505	0.0285692	4.38059	5.51475	5.44294	3.8885	4.5552	5.79779	7.1914	0	0	0.0285692	0	4.99684	6.78031	3.61235	0.0285692	6.3572	0.575312	0.0143553	0.0565835	0.111031	3.23573	3.15704	6.40207	0.0426443	3.70377	6.23802	0.695994	0.485427	7.24117	3.37573	5.45943	1.05658	7.38681
ACH-000430	2.90497	0	6.48382	2.12102	3.93923	0.0143553	0.15056	5.30852	3.55582	4.52042	3.49313	4.0321	6.20281	0.0285692	0.687061	0.0703893	4.35403	5.35473	5.33414	3.30012	5.33593	6.27445	7.63655	0	0.0426443	0.0426443	0.0703893	4.93687	6.01814	3.55336	0	6.43546	0.0426443	0.111031	4.5552	4.33414	5.4941	2.98003	6.94216	7.33682	3.99005	5.7703	0.918386	2.1635	7.67694	1.0635	6.19751	5.39883	8.9757
ACH-001041	4.51728	0	6.69404	2.43296	4.43563	0.0426443	0.124328	0.815575	3.02503	4.65878	1.70487	4.85449	5.04352	0.0426443	0.250962	0.137504	4.50271	6.03606	5.68818	3.31904	4.99955	5.2604	7.51389	0.0426443	0.0565835	0.0285692	0.0143553	4.81813	5.5404	3.849	0.0565835	6.77847	0.823749	3.02326	1.26303	2.43296	4.13258	0.0285692	3.90689	2.0635	4.73769	7.18478	1.5008	6.5624	7.84493	3.9644	6.23649	4.74792	7.49609
ACH-000370	4.91791	1.29278	6.61794	2.19219	3.52231	0.189034	4.44427	7.05018	3.79597	4.0505	0.378512	3.29572	5.9305	4.05311	5.33199	0.0143553	5.42828	5.34837	5.75756	3.30889	6.50906	7.20398	9.18145	0.0565835	0.0703893	0.0976108	2.66903	4.86047	7.65112	4.52482	0.344828	6.86419	3.14405	0.432959	2.63691	3.60407	4.86245	1.9486	4.88899	0.263034	3.47768	6.13853	0.432959	0.0143553	8.43654	3.80529	6.99673	6.56758	6.92458
ACH-001630	5.37678	0	6.46107	1.25701	3.04264	0.0143553	0.704872	6.14649	2.23573	2.54597	1.14405	2.19219	4.94579	1.69153	3.81558	0	3.63343	4.63575	4.18507	1.95233	6.14751	4.69377	6.91624	0.454176	0.432959	0.31034	1.87184	3.07895	6.51712	2.7761	1.1375	6.89215	1.73118	2.22033	2.4489	3.93923	2.35896	0.807355	3.25399	0.0703893	3.36177	3.73769	1.58496	2.89724	8.05039	1.17632	5.24375	2.45418	6.57031
ACH-000437	4.01346	0	6.65234	2.01792	3.99095	0.15056	1.32193	6.24317	4.62761	3.68032	2.6893	3.57531	5.38612	0.15056	2.11437	0.847997	5.48832	6.70984	5.66562	4.20555	6.76168	6.36807	8.85393	1.84398	0.321928	0.575312	4.75221	4.36877	7.24127	4.53605	0.773996	6.84398	1.32769	2.15381	0.250962	2.07382	4.04963	2.1635	4.79077	7.25058	4.18031	6.56925	1.53107	0.831877	7.95158	3.49953	6.35262	6.90701	8.01419
ACH-000498	0.286881	0	5.55827	2.52857	3.66107	2.43563	3.28244	3.41549	4.87922	4.52982	2.68257	4.12598	5.34696	2.44095	0.201634	0.111031	4.0505	5.07253	5.55612	4.23496	4.36107	5.904	7.84562	0.0285692	0.378512	0.0840643	0	4.59156	6.05918	3.45154	0.495695	7.3427	1.20789	0.0143553	3.46728	1.1177	3.73877	3.14893	5.44361	4.00899	4.49313	7.31533	1.15704	0.0143553	5.38301	2.75702	5.69488	7.29416	8.36733
ACH-001392	3.0036	0	4.94439	1.37851	0.963474	0	0.0565835	4.11936	1.87971	2.58736	1.51096	2.774	5.13299	2.35332	4.97911	0.137504	3.58976	3.84599	3.45812	2.31034	4.79753	3.16672	3.7301	0.189034	0.815575	0.0565835	0	3.33056	4.16027	2.14731	0.516015	6.03782	1.34483	0.0285692	4.58616	4.02237	2.22651	0	1.90689	0.0840643	3.16993	4.64443	0.378512	2.46728	7.25786	0.176323	4.58556	6.74712	4.91504
ACH-000503	3.74093	0	5.72656	1.20163	2.38957	0.163499	2.01078	5.12019	5.26791	3.2854	2.7761	4.78712	5.00899	0.124328	4.05485	0.0143553	4.23496	6.12578	4.45022	2.61117	5.71589	4.64962	6.84222	0.464668	1.68706	0.0840643	0.992768	3.81455	6.63561	3.06523	0.226509	6.66007	2.12102	1.97453	1.57531	2.32193	3.35614	1.926	5.94134	2.96162	2.66903	4.15137	0.443607	4.34483	6.71232	1.68257	6.02967	3.70929	7.16541
ACH-000328	5.83162	0	7.28031	2.5509	5.20867	0.124328	4.51096	7.15906	4.55152	5.20672	3.12433	4.60348	5.87184	4.41481	4.25776	0.176323	5.41143	6.61515	5.82171	2.926	5.13586	6.95303	8.43471	0	0.739848	0.367371	2.41143	4.13996	7.00349	4.50335	0.948601	6.81788	1.90304	2.05658	3.6565	3.47508	3.904	2.41954	4.75114	5.42257	4.01346	6.44245	0.722466	0.0840643	7.38681	3.57652	6.37086	6.07211	7.77972
ACH-000403	4.63459	0	7.47427	2.61589	5.09803	0.111031	0.31034	6.33825	4.83289	4.45549	3.05832	4.91839	6.41802	3.22188	3.1375	0.298658	4.84649	5.12516	4.66562	2.74846	5.70736	5.42526	7.11811	2.52105	0.613532	0.226509	0.367371	4.40735	8.33874	4.48607	0.31034	6.94579	0.189034	0.189034	5.65421	4.16993	3.46074	2.39232	6.96371	5.05137	4.14241	5.66363	0.765535	0.286881	7.2854	2.65306	6.56773	2.78031	7.56605
ACH-000400	5.67243	0	5.98914	2.75061	3.47119	0	0.0565835	5.9148	5.86171	4.06867	2.12433	2.76765	5.06264	2.33342	0.378512	3.90977	4.37016	5.01033	4.80839	3.38267	5.54195	5.40327	5.81737	1.82782	6.9357	0.111031	0.0143553	3.1811	6.02658	3.44758	5.56346	5.80271	2.02857	0.565597	5.02459	3.68482	3.4019	2.10098	4.36807	0.0976108	3.30159	5.80038	0.321928	0.0565835	8.01307	2.47249	5.74631	1.65076	7.59991
ACH-000224	3.70044	0	5.86047	2.09761	1.88753	0.0285692	6.7086	6.13545	4.22651	3.41143	3.0054	5.5008	4.26003	0.687061	4.81044	0.0143553	4.63981	4.93216	4.87676	3.40735	5.87873	5.61265	10.2385	0.356144	0	1.71809	0.411426	4.12516	8.0927	3.94017	0.15056	5.8475	3.20945	2.88753	0.111031	1.09761	3.92695	1.09085	4.98778	3.83491	3.42895	6.38595	0.495695	0	7.23352	2.49825	5.71452	6.56773	7.02314
ACH-000318	4.34767	0	6.64746	1.52607	2.66676	0.124328	1.22033	5.19338	5.01614	3.14078	3.11936	3.93168	4.85699	1.41143	2.9542	0.0565835	3.46336	5.45516	4.29719	3.02326	6.59036	4.58256	5.24793	0.9855	0.0976108	0.0426443	0.0143553	4.98687	5.67835	3.16672	0.238787	6.27333	2.08406	0.863938	1.67807	2.26604	2.66448	1.20789	4.17153	1.50589	3.78555	5.99503	0.687061	0.722466	7.26754	1.77821	5.57077	4.2149	7.57637
ACH-001430	5.17552	3.02326	6.47444	2.55827	4.47703	0	0.0143553	0.0426443	3.87676	5.70984	0	1.70044	5.16631	0.0565835	4.92884	0.565597	4.41007	5.8089	5.33593	2.6893	4.73769	5.26266	10.4932	0	0	0.0143553	0	3.89336	5.76951	3.90881	0.941106	6.58706	3.24489	8.03974	0.124328	2.96347	3.5741	0.516015	4.37712	4.37851	3.51223	6.14343	0.799087	0.464668	6.78084	3.57894	5.83137	4.6241	7.76944
ACH-000928	4.95606	0	6.09381	2.06695	2.69377	0.0143553	0.0285692	4.63227	4.37156	4.48864	2.43829	4.31397	5.01569	3.26003	2.87971	0.0285692	4.00899	6.77347	4.46467	3.90977	5.86542	5.91719	6.99345	0.432959	0.0285692	0.0703893	0.0285692	4.06695	6.65163	3.9222	0.0143553	5.89966	5.03166	0.454176	3.51096	5.44328	3.99729	2.26003	4.65421	0.847997	3.67356	6.64746	0.613532	1.29866	7.61721	1.25096	6.20124	5.93475	7.27137
ACH-000893	4.01703	0	6.62498	2.46205	4.12267	0.0565835	4.65076	6.32894	6.14873	4.59156	2.62059	3.20006	5.66363	3.92315	3.44095	0.298658	4.94813	6.25096	5.31832	4.61765	6.49937	5.62322	7.45269	0.111031	0.0143553	0.790772	2.22959	4.38336	7.76713	4.35332	3.21878	6.87295	2.48543	3.21257	5.20359	4.81301	3.69711	2.61589	5.1375	6.49953	3.74846	5.79233	0.687061	0.731183	7.62739	3.18428	6.89821	4.33414	7.11946
ACH-000889	0.0426443	0	6.21432	3.02857	4.07639	0.422233	0.739848	4.0993	4.28392	5.20203	1.9222	3.4489	6.61574	4.03298	0.0976108	1.68257	4.05398	6.06178	5.10852	3.69488	6.11312	6.40276	0.895303	0.137504	0	0.389567	1.68257	3.84197	5.6946	3.74201	0	6.63387	2.79286	1.60407	3.99367	5.06393	4.48027	4.40735	5.83517	0.176323	3.72356	6.69377	1.61353	4.05137	7.29389	0.85599	6.55136	1.10434	7.96919
ACH-000799	3.67694	0.0143553	6.15036	2.82985	3.83794	0.0426443	0.0976108	5.78241	3.7148	3.76553	3.5008	5.53356	4.749	1.80735	1.45943	0.333424	4.852	5.22149	5.45319	2.95047	5.36282	5.58256	8.58875	0.903038	0.111031	1.03562	0	4.75382	6.07189	2.88362	0.226509	5.86394	0.83996	2.75275	2.7137	4.92742	4.29499	0.201634	3.66448	0.163499	3.84298	6.14323	0.443607	0.536053	7.94468	3.15704	5.77215	5.69265	7.15654
ACH-001623	4.72028	0	7.18319	2.18269	4.08576	0.0285692	4.2426	6.56453	3.88069	5.2149	2.61353	4.0072	4.62585	1.66903	1.09761	0.722466	5.16068	7.16098	5.45713	3.1177	6.08704	6.98299	7.93416	0.263034	0.0976108	0.0703893	0.250962	3.74093	5.82375	4.26228	0	7.11072	3.61824	1.15056	0.0285692	2.05311	4.38405	0.378512	4.87036	5.40667	3.69153	5.59544	0.650765	1.98914	7.30351	2.852	6.1035	4.97545	7.80503
ACH-000736	3.79597	0	6.70321	2.05658	3.78136	0.0426443	0.918386	7.75862	5.42861	5.11395	2.48285	4.16511	5.37016	2.96717	4.54164	2.57046	4.11936	6.42307	4.49825	3.16189	6.43196	5.58195	7.91385	1.09085	2.47768	0.0426443	0.111031	4.3505	6.92374	3.95513	0.163499	7.45828	0.111031	0.15056	5.54411	5.35368	3.94953	2.33914	5.16108	1.43296	3.93546	5.98231	0.687061	2.02503	7.40318	0.250962	6.17313	0.411426	7.90767
ACH-000876	4.19219	0	6.24432	2.0036	2.43829	0.0143553	2.23266	6.30469	6.03518	4.02237	2.9982	5.16471	4.93546	3.64962	4.14241	0.536053	3.89724	4.82782	4.81558	2.07039	5.98208	5.26716	6.95873	0.0143553	5.83643	0.124328	0	3.45681	7.33753	3.87774	3.81865	5.8775	2.98914	0.356144	5.12226	4.53107	3.10601	0.111031	4.37016	4.33199	2.72465	5.41549	0.782409	0.214125	7.54466	0.163499	6.21335	4.393	7.30095
ACH-001232	5.8846	0	7.27006	2.33914	4.64962	0.31034	5.84046	7.46964	2.34199	4.70819	2.74416	3.5097	5.61794	3.45812	5.77926	0	5.21257	5.34908	5.12516	2.62527	5.74953	7.36877	9.70056	0.604071	0	0.344828	1.1635	4.2817	7.23707	4.33128	0	7.06264	2.77189	1.43296	0.536053	3.76553	4.2211	0.226509	4.01078	5.07425	3.44758	5.74819	0.790772	0.411426	7.47184	1.57531	5.6241	7.51483	7.88387
ACH-001618	4.60288	0	7.19397	1.66448	3.09255	0.0703893	0.956057	5.54133	4.65249	5.46695	0.31034	2.07724	6.4002	3.01436	0.15056	0.475085	2.7137	3.84197	4.1811	3.52482	3.05137	5.4793	3.04614	0	0.0143553	0.0285692	0	3.0635	5.13175	3.07553	0.137504	6.56209	1.83592	1.48543	2.49057	1.40599	2.75489	2.67356	6.64674	6.34483	4.01078	5.16027	0.422233	2.07039	7.55059	0.0565835	5.97774	6.86071	7.60392
ACH-000235	5.39712	0	6.65921	2.74631	4.19613	0.0840643	4.42492	6.04527	6.16692	3.63807	2.55582	4.23879	4.55152	2.74846	2.27798	0.111031	4.74739	5.95466	4.56071	3.27352	5.95093	5.90905	7.02126	3.03386	2.34199	0.0840643	0	4.54535	7.23247	3.67807	0.443607	6.97338	0.238787	1.87578	4.91743	4.13011	3.774	2.65764	5.53947	5.31179	3.6311	5.55059	0.594549	0.0143553	7.0955	1.46467	5.848	3.22033	7.04821
ACH-000381	5.82043	0.389567	6.23573	2.61824	4.14078	0.0143553	0.0565835	6.80774	5.31759	4.22805	2.18269	3.45286	5.94064	2.72465	0.31034	5.69766	4.64501	6.7039	4.95233	4.2555	5.11312	6.28965	7.03463	1.73118	2.36737	0.0565835	0.0426443	4.46401	6.24679	3.86196	0.0703893	7.50875	2.854	0.0143553	5.18349	3.01792	2.8339	2.42761	5.69627	1.89918	3.86888	6.26735	0.400538	0.111031	7.08566	2.61117	5.83086	3.9855	8.2095
ACH-001993	0	0	6.24584	2.66676	3.42492	0.0143553	0	0.0976108	5.25172	5.0148	2.26903	3.63807	5.52293	0	2.05658	0	3.98003	5.61912	4.99141	3.67469	5.18031	6.19712	7.46663	0.0565835	0	0	0.378512	4.84549	5.3505	3.85499	0	6.7389	0	0	0.565597	2.58256	3.60999	3.87184	3.82883	0	3.22497	6.6605	0.604071	0	7.38068	3.24184	5.78319	4.79025	7.03958
ACH-001301	5.88142	0	6.50112	2.49313	3.93452	0.0285692	0.0565835	0.189034	4.91934	5.08576	1.58015	1.926	6.06221	0.0143553	3.35755	0	4.36387	6.33664	5.0993	2.20163	5.61589	5.75782	0.286881	0.275007	0.0565835	0	0	3.50716	5.69627	4.75489	3.98459	6.04614	7.22072	0.956057	6.52779	5.08831	3.86295	0.0703893	0.0840643	3.05658	3.90497	5.8495	2.76129	3.61471	7.46287	3.66448	5.87529	2.22959	6.67172
ACH-000854	0.0426443	0	5.66477	1.96717	3.05137	0.0976108	0.910733	4.76713	4.43763	3.84599	1.16993	4.36597	5.39883	1.774	0.238787	0.0565835	3.81762	5.67327	3.852	3.10769	5.1811	6.19338	5.58406	0	0.0426443	0.321928	0.443607	2.49313	5.46597	3.71918	0	6.3087	0.15056	0.0143553	3.89045	0.650765	3.04089	4.11353	7.16239	0.214125	3.0036	6.33092	0.432959	0.0143553	6.29352	2.61824	5.32517	4.58075	7.488
ACH-000187	3.12763	0	6.87897	2.59216	4.30378	0.389567	0.0143553	2.83592	6.06415	5.01792	3.1811	4.36527	5.73742	4.65764	1.98185	0.0840643	4.65935	6.39883	5.59276	2.80116	5.92386	6.36527	0.432959	0.214125	0.0426443	0.111031	0	4.87381	6.81173	4.17871	1.32769	5.27538	0.176323	0.0976108	6.24717	4.99865	4.32625	0.0143553	3.10098	0.226509	3.89336	5.38716	4.34979	4.42156	7.56362	4.03738	6.61102	2.33914	7.40837
ACH-000543	4.91265	0	6.28096	1.51096	2.28688	0.389567	4.2891	6.97062	3.41414	3.91169	3.36457	4.37573	5.44692	2.72465	2.18903	0.464668	5.17513	5.7658	4.97636	2.94111	6.20945	5.46336	9.38176	0.516015	0	1.40054	2.01436	5.07211	7.80587	4.36387	0.226509	6.74322	1.73552	2.11437	0.765535	1.08406	3.8885	0.389567	3.70266	4.91169	2.93546	6.32876	0.475085	1.12433	8.4672	3.72247	6.32697	5.88972	7.80845
ACH-000569	4.42089	0	6.48301	1.5509	2.8679	0	3.82375	5.6372	2.66903	4.87431	2.74631	5.44394	5.80116	2.8679	1.0635	0.31034	4.69877	5.69988	5.09719	3.30597	6.22689	6.01748	8.59137	0.0285692	0.0426443	0.0143553	2.0321	3.86295	7.62169	4.28318	0.344828	6.57667	1.01436	1.8679	2.30159	5.05745	4.80993	1.51096	6.72069	0.748461	3.74201	5.47832	0.739848	3.8748	7.59701	6.45105	7.11686	4.76288	7.3856
ACH-000668	5.64818	0.0285692	6.28817	3.63691	4.99774	0.641546	1.39506	5.98413	5.81992	4.06609	3.85599	5.84624	5.16872	3.34056	5.53978	0.0285692	4.97361	6.84712	5.65935	3.46858	5.75942	5.99209	6.1645	1.50589	0.176323	0.0143553	0.250962	4.61471	7.10685	3.67356	1.1635	6.70321	1.16993	0.831877	3.68257	5.73633	3.07895	3.66334	5.06781	4.79649	3.13258	5.86839	0.111031	0.0426443	8.3122	0.367371	5.6792	5.24451	8.55071
ACH-000134	3.84599	0	5.98846	2.32769	3.29278	0.0426443	4.749	6.28503	3.73335	3.91456	3.60881	6.75862	4.52042	2.38957	4.10601	0.163499	5.66306	5.9331	4.88606	3.45549	6.05918	5.81096	9.74621	0.0143553	0	0.176323	0	4.33771	8.58011	4.31976	0.0840643	6.41616	0.495695	2.61353	0.111031	0.903038	4.33128	1.17632	5.50653	7.93664	3.57773	6.44973	0.62293	2.33342	7.0751	3.32625	5.98003	7.71473	6.78346
ACH-000924	4.35332	0.0426443	7.29499	2.20163	4.33557	0.0143553	1.49057	5.79831	6.86913	4.23496	2.6017	2.02148	6.61706	0.111031	1.85599	0.214125	4.23419	5.27314	4.86938	2.50843	5.38405	5.84474	7.86511	0.0143553	0.0426443	0.659925	0.823749	4.24108	7.02901	3.23879	0.15056	5.62234	0.903038	3.03562	2.0635	2.9542	4.08321	0.333424	5.05702	7.07799	3.849	5.16792	0.454176	0.807355	7.12247	5.18547	6.76818	4.15137	7.44444
ACH-001450	0	0	5.972	2.16027	2.96532	4.45154	0	0.0143553	4.16269	5.50048	1.60881	2.94298	5.29462	2.06005	0.0143553	0	2.91839	3.23113	3.80839	3.03914	5.19613	5.46467	6.31814	0	0	0.0285692	0	4.71425	5.98277	3.37016	0	6.21568	0.0285692	0	0.275007	0.757023	1.79494	0.0426443	3.11103	0	4.23573	5.42425	0.356144	0	6.55842	0.464668	6.10245	0.739848	7.658
ACH-000296	5.38232	0.15056	6.55167	2.59216	4.35262	0.0426443	0.0976108	6.42089	4.88704	4.53543	2.61117	3.46858	4.49185	2.76341	2.63923	0.286881	3.62059	4.49442	4.57652	3.71149	4.99729	4.96763	6.78333	1.64616	2.35896	0.389567	1.07039	4.43229	7.44915	3.52607	0.863938	6.47021	0.111031	0.454176	6.6879	4.40259	4.8334	2.17313	5.17911	2.60881	3.94111	6.00203	0.263034	5.00135	6.75809	1.46467	6.58826	7.02669	7.95786
ACH-000713	5.7021	0	7.10978	1.774	3.50589	0.0840643	2.88557	6.67158	6.38767	5.29939	2.27501	3.71039	5.30634	4.46336	5.50779	0.0143553	5.02192	6.59066	5.05007	4.02857	6.51049	5.75141	7.85848	0.31034	0.659925	0.0976108	2.50843	3.16993	6.22362	4.13258	0.669027	7.07991	4.46989	1.40054	4.1914	4.47703	3.61235	3.07724	3.90111	0.286881	3.75596	5.15704	2.3505	2.20163	7.88013	2.78241	5.45779	5.40088	7.17722
ACH-001360	4.749	0	6.19712	1.65076	2.774	0.0840643	0.0565835	5.90929	5.14649	3.45681	2.65306	3.31615	4.29866	1.57531	3.58496	0	2.88557	4.47054	4.51665	3.0268	6.283	3.60051	6.78228	0	0.0285692	0.321928	1.41684	3.24184	5.86369	3.96809	0	5.87578	1.90689	0.214125	3.43296	3.42089	2.30159	0.632268	2.89724	3.84499	3.10434	4.45154	0.367371	2.04264	7.67433	1.29866	6.40259	3.63459	7.64861
ACH-000273	4.95	0	6.42928	2.16027	4.03298	0.238787	6.62863	7.66463	4.05311	4.21568	2.852	3.95791	5.97774	0.0143553	4.56194	0	3.61353	5.77873	3.65764	3.09255	5.6565	8.06361	8.02281	0.0285692	0	0.0976108	3.14568	6.72492	7.0581	4.03914	0.0565835	7.33932	0.111031	3.09592	1.51602	1.44361	3.92029	0.432959	4.78136	4.14323	3.23879	6.18567	0.790772	0.505891	6.58752	2.41414	5.62264	8.39416	7.79837
ACH-001715	5.37086	0	6.61809	2.1177	4.44095	0.111031	3.98368	6.71026	4.08236	4.41684	2.44626	2.63691	4.55152	0.0143553	0.9855	0	4.23036	6.6008	4.07553	2.68706	5.43463	6.66221	8.37086	0	0	0.163499	3.32912	6.22246	7.33771	4.12267	0	7.81999	1.18903	1.03562	0.226509	0.632268	4.12184	0.613532	4.42358	6.06415	3.65764	5.08831	0.695994	1.07724	6.91325	2.37851	5.44493	6.26491	7.8416
ACH-001617	0	0	6.91636	2.72247	4.12019	0.432959	0	0.0565835	4.42694	5.61265	2.38405	2.7137	5.7811	3.08916	0.226509	0	3.51979	3.93357	4.75382	3.47119	4.22882	5.28096	6.36317	0	0.0976108	0.0285692	0.201634	4.57289	5.47346	3.93074	0	6.26978	0	0.0143553	0.0143553	0.978196	3.1375	0.464668	5.62877	0	3.85997	6.21257	0.422233	0	7.22391	2.74846	6.23764	2.33914	7.4224
ACH-000639	4.96486	0.0285692	5.89288	1.48027	3.04789	0.0703893	0.0703893	5.7952	6.64198	5.62848	2.54597	3.72574	6.03452	3.49825	1.03562	0.176323	5.25701	6.56148	5.71727	3.70377	5.09297	6.82197	0.464668	0.799087	0.0285692	0.0840643	1.72247	4.37295	6.5452	4.5008	0.176323	6.41397	2.44626	0.0840643	6.83175	5.49153	4.15299	0.0426443	4.55766	0.941106	4.78084	5.91624	3.73985	4.48929	7.56293	1.20163	6.72151	3.9514	7.97401
ACH-000590	4.23189	0	5.03254	1.4957	2.35896	0.0143553	1.20163	6.16169	4.06609	4.18903	2.03562	3.0993	4.52669	2.774	3.36877	0.0143553	4.10014	5.29131	4.30086	3.05832	3.97545	5.4522	5.25096	0.941106	0.0565835	0.0976108	1.1635	4.25172	6.36089	2.89142	0.163499	6.02281	0.516015	2.07039	3.62527	4.10098	3.67129	1.10434	4.75756	6.16712	2.65306	5.47508	0.275007	1.27501	7.44824	1.02148	5.57198	2.87971	6.78372
ACH-000553	6.2589	0	6.25965	2.27202	3.95233	0.0976108	1.76977	5.98185	6.27482	5.08151	2.93168	4.04876	5.98891	3.24641	1.05658	0.0426443	5.15704	5.2765	4.39232	2.96347	6.43929	6.55597	7.12143	2.87774	0.0703893	0.400538	0	4.18982	7.988	3.91073	0.0426443	7.02702	0	0.0285692	5.17951	5.18507	2.82782	2.56803	7.41032	6.26322	4.1416	5.49921	0.286881	1.33914	7.21636	2.23879	7.00259	1.5656	7.83674
ACH-000084	1.40599	0	5.60199	3.05485	3.64731	5.79233	0.15056	3.84699	5.80012	5.25701	2.28096	4.42962	5.21062	1.79909	3.1127	3.44361	4.12102	4.48543	5.4002	3.98185	4.32121	5.98596	8.51708	0.226509	0.0840643	0.0565835	0.0143553	5.68818	7.04023	4.22882	0.15056	7.53986	0.0285692	0	6.28633	0.575312	4.86146	4.21412	6.98413	4.851	4.06523	7.63241	1.44361	0.0426443	6.75929	0.0285692	5.49089	7.65864	7.7896
ACH-000094	6.22342	0.0143553	6.30561	3.02326	2.98185	0.0143553	5.36982	6.2778	4.82273	3.59335	2.16027	4.11437	5.33307	0.933573	1.57046	0.0426443	4.36457	5.87381	4.68874	2.26003	5.14078	5.53667	6.25682	4.66789	5.42122	0.575312	0	4.6893	6.91612	3.19849	4.75756	6.00338	0.0143553	1.59455	5.61853	4.03914	3.44095	3.22805	6.08236	6.25682	3.62527	5.38785	0.15056	1.21412	6.62585	1.53107	5.41414	3.20789	7.32076
ACH-000361	4.39575	0	5.98868	1.65535	3.14893	0.0565835	1.23879	5.34837	3.56071	3.95047	2.53107	4.393	5.75942	1.07724	0.871844	0.0143553	4.09761	5.55121	4.56742	3.37712	6.33807	5.31252	7.56765	0.0840643	0.0285692	0.0143553	0.0840643	4.49313	7.83453	4.18745	0	6.77439	0.0976108	0.0840643	3.19377	3.75596	4.09508	1.83996	7.14006	7.09381	3.76553	5.81992	0.575312	0.823749	7.6532	3.21412	6.62877	2.69377	7.86858
ACH-000719	4.60999	0	6.9607	1.76129	2.1177	0.0143553	0.0565835	6.28188	4.25626	3.43962	3.32769	5.15583	4.58135	1.40599	1.29278	0.263034	2.1635	4.10434	2.38681	2.17951	5.17911	5.78921	0.895303	2.72465	0.226509	0.275007	0.275007	3.42223	6.42341	5.66249	0.992768	6.5656	3.98914	0.62293	5.30086	3.48414	2.93357	1	4.83036	5.13996	3.52857	5.88411	0.799087	6.25493	7.07232	2.8679	5.49633	4.2032	7.16279
ACH-001396	3.59813	0	5.3147	2.45418	3.33628	0.356144	0.0426443	5.14893	3.82579	2.8679	2.60644	4.45746	4.84298	2.08406	2.54597	0	4.82222	6.90989	6.46809	3.20477	5.27575	3.74201	4.7845	0	0	0	0	4.51728	5.05918	3.75382	0.111031	5.13955	0	0.238787	6.4271	3.90497	2.10098	0.0143553	2.79494	0.485427	3.54967	5.03342	0.400538	0.0703893	6.53247	0.748461	5.76845	5.64472	7.24441
ACH-001848	4.26754	0	7.01179	2.19849	3.72792	0.0426443	5.48123	6.26303	3.48156	3.27202	2.848	5.17513	3.56071	3.21101	2.83794	0.0285692	4.26078	7.4605	4.52795	1.5656	5.8802	4.54411	8.12598	3.91361	2.26604	0.124328	0.748461	4.95047	6.81083	3.45549	0.0840643	6.14893	0.250962	1.1635	4.45746	3.07895	2.66903	2.83996	4.74039	5.55213	2.60881	4.28318	0.815575	1.0072	6.44045	0.298658	4.95606	2.36457	7.33172
ACH-000339	5.55213	0.0285692	7.23688	2.03562	4.59574	0.0565835	3.51602	5.7339	5.04352	4.82018	3.62293	4.62176	5.02547	1.28096	1.12433	0.111031	4.51096	5.749	4.79597	3.27352	6.60792	6.32445	7.27501	0.918386	0.0143553	0.0143553	0.263034	4.31687	7.98715	3.6311	0	6.60822	2.07724	3.66107	2.65535	1.95977	4.89772	1.40599	4.15218	6.85337	3.90593	6.28392	0.650765	1.64616	6.50032	0.0840643	5.96463	4.12681	8.35997
ACH-000218	0.124328	0	5.62498	2.37016	4.13011	6.32697	0.15056	5.42291	4.76553	4.8525	1.76129	3.23266	5.33414	0.0143553	0.124328	0	3.56682	4.76607	5.14445	4.12763	3.58616	5.09255	3.62059	0.0703893	0.0703893	0.0426443	0.0840643	5.12143	5.84474	3.91648	0.163499	8.03694	2.65992	0.0143553	0.400538	0.176323	2.73985	2.60644	5.42156	1.0635	3.96809	7.52019	2.87774	2.0072	6.97945	2.24184	5.13504	6.67483	8.05072
ACH-000789	1.91073	0	5.86691	2.94673	4.54288	0	0.111031	4.50462	6.42442	4.13504	3.6241	4.80478	4.96717	3.26903	1.28096	0.298658	4.75862	5.87381	5.62761	3.97545	5.89651	5.70515	11.7398	0.641546	0.226509	0.250962	0	5.61383	7.5812	4.40395	6.92636	6.66164	2.93546	1.37295	7.11312	4.98687	4.02148	0.0703893	4.17632	0.163499	4.3875	6.31669	4.97453	5.59664	8.45446	5.61442	6.45236	5.24755	8.67864
ACH-000413	3.95977	0	5.84097	2.37295	2.44626	0.0143553	5.62702	6.08364	4.15137	3.65764	2.81558	4.85499	4.56377	0.443607	1.75275	0.238787	4.91648	5.08279	4.7703	3.09761	6.11124	5.48671	9.57618	0.0143553	0	0.0285692	0.516015	3.84097	7.85599	4.2426	0.111031	6.11249	2.13422	0.687061	0.411426	1.48027	4.27202	0.815575	5.37955	3.61235	3.82273	6.98561	0.659925	0.0285692	7.27947	3.29425	5.99186	6.33646	6.88093
ACH-000125	3.32048	0	6.24736	2.62761	3.22959	0	3.54597	6.71273	3.89724	4.02945	3.2032	4.95884	4.70321	0.31034	3.50716	0.464668	5.18706	5.81916	5.03474	3.18745	6.24108	5.56712	9.77864	0.0285692	0.0565835	0.632268	0.0143553	3.85699	8.2998	4.20711	0.0976108	6.02303	0.613532	1.28096	0.464668	0.495695	4.35332	1.92979	5.17153	6.98652	3.61706	6.60214	0.713696	0.189034	7.00394	3.52607	5.97499	8.07152	6.83099
ACH-000180	3.83188	0	5.93758	2.28392	3.41414	0.0840643	4.48027	6.44907	3.38267	4.22728	3.44493	5.56529	4.74362	1.75275	4.55336	0.0976108	4.66732	4.79857	4.80478	3.25248	6.2407	5.87283	10.26	0.713696	0	1.55582	0.678072	4.75275	8.05192	3.89239	0.0840643	6.1206	1.62293	0.799087	1.23879	1.40054	3.89142	1.07039	4.89288	4.81352	3.33628	6.43012	0.475085	0.0143553	7.54581	2.66903	6.224	6.58916	7.01703
ACH-000215	4.05311	0	6.36755	2.02857	3.86493	0.0285692	4.59216	7.19564	5.45286	4.83895	1.76129	3.07211	5.06652	0	1.88362	1.73985	5.4192	5.86146	5.91624	3.46597	6.26885	6.31379	8.88145	0.545968	4.94767	0.963474	4.70984	5.07125	7.06641	4.52105	4.86245	6.86245	2.04614	3.79597	0.286881	2.19849	4.15056	0.773996	3.87676	6.30049	3.40735	6.63648	0.669027	0.124328	8.42731	3.42761	6.64024	6.47379	7.27947
ACH-001001	5.4219	0	7.31034	1.774	3.78973	0.0143553	0.695994	5.38543	4.61941	3.43696	2.4957	3.24945	5.90111	2.91456	0.903038	0.0285692	3.01614	5.28503	4.18428	3.22497	4.41414	5.43996	5.6865	0	0.0285692	0.0976108	2.58015	4.50906	6.48945	3.64386	0.176323	6.35279	2.23573	0.933573	2.58256	3.66562	3.76871	0.0426443	4.30012	4.48607	3.70155	5.37434	0.263034	3.17792	6.28392	1.76977	5.66619	4.20633	7.53714
ACH-000407	4.83643	0	6.34855	2.32769	3.10266	0.0143553	4.19377	5.36001	4.01614	4.68145	1.848	2.75061	5.79286	2.06695	0.678072	0.0285692	4.03914	4.30816	4.26679	3.34625	5.71039	6.00405	8.05132	2.50335	0	0.15056	1.64155	4.09339	6.39455	3.91934	0.0565835	6.01346	2.57531	0.250962	0.863938	2.33914	4.29057	0.275007	4.11853	5.50621	3.63227	5.73904	0.739848	3.90497	7.02967	2.35896	5.54195	5.43095	7.29471
ACH-002027	5.11103	0	5.7271	1.15056	1.14405	0.0976108	0	5.74953	4.82579	3.15543	1.63691	2.15056	4.31397	2.53605	2.97636	0.765535	3.38543	4.60288	3.22959	0.887525	4.94486	5.07639	7.00034	4.24031	0.650765	0.0143553	0	3.73552	6.87566	3.49953	0	5.03254	4.04527	0.0565835	2.47249	5.36142	2.5008	1.79494	5.1014	0.422233	2.67129	4.98641	0.704872	0.0143553	7.56727	1.848	5.93381	7.14098	6.46271
ACH-001132	0.0426443	0	5.55919	2.774	3.27352	6.12247	0.0565835	2.85798	4.24717	4.41886	3.76447	4.58976	4.39232	3.30159	0.0840643	0.15056	4.69209	3.69153	4.93026	4.72028	3.93357	5.49761	6.00315	0.0143553	0.0143553	0.0143553	0.0426443	4.8515	6.71973	4.37295	0.189034	7.73186	0.0426443	0	1.62293	0.15056	2.55827	2.7845	6.25946	3.44361	3.88362	6.615	0.831877	0.0285692	7.08523	2.65764	5.96648	5.63169	6.60984
ACH-001278	4.48993	0	5.68594	2.03562	2.93546	0.0285692	0.321928	4.65134	3.75916	3.75916	2.23266	2.34199	5.06393	3.48543	4.25248	0.15056	4.91361	5.92244	4.94533	4.20085	4.51223	5.98025	6.16571	0.0143553	0	0.0976108	0.163499	3.53854	5.71754	3.07553	0.0703893	7.33324	1.45418	0.669027	1.95977	4.02326	4.75168	0.214125	4.45022	0.31034	4.50016	6.71987	0.584963	0.111031	7.2446	4.1375	5.8495	7.57266	6.89785
ACH-000032	0.0976108	0	5.71864	3.5509	5.31397	0.0285692	0.0703893	0.275007	4.7845	5.65907	1.22651	3.32625	5.99661	1.60407	0.831877	0	4.17313	4.15137	5.14731	4.51916	5.58676	6.30342	5.45878	0.0976108	0	4.43563	3.0054	5.28577	6.1266	3.92979	0	7.06932	0.0426443	0.0143553	1.13093	0.0976108	2.95606	3.46728	3.93263	0.400538	3.91073	8.40152	0.757023	0.0143553	7.37165	1.04264	5.80245	7.73796	8.03138
ACH-001419	5.43996	0	6.52262	1.9222	3.25399	0	0.0703893	5.49729	5.32948	2.90497	2.27798	1.8679	5.22072	1.12433	2.59216	0	2.22342	4.49633	3.28244	3.54967	5.30378	3.00899	4.96671	0.400538	0.0426443	0.0285692	0	4.56133	6.1645	2.774	0.201634	6.69432	0.201634	1.33914	4.52982	2.4489	2.46205	1.43829	4.85	3.46074	3.36317	4.89336	0.201634	0.31034	7.61684	1.62293	7.68068	3.10098	7.02348
ACH-000494	4.81044	0	6.1641	2.32769	4.04352	0.298658	4.93876	6.36317	4.51538	4.25927	2.98732	4.29866	5.46009	2.42761	4.68257	0.454176	4.29646	7.10203	4.81044	4.40531	6.11624	5.72	8.79006	0.15056	0	0.0703893	0.0143553	4.0036	6.32301	3.85	0.782409	6.91277	3.10434	0.0426443	3.74524	3.72901	4.25096	2.42761	5.83289	7.02945	4.16591	7.0581	1.01436	4.32841	7.62249	1.34483	6.00293	4.58436	7.44774
ACH-000865	3.57289	0.0840643	7.26772	2.41684	3.5435	0.0426443	1.3505	5.39815	5.6401	3.76129	2.42761	4.14568	6.27612	1.22651	0.739848	0	4.43696	7.32238	4.68762	4.20789	5.4363	5.96463	5.56894	0.137504	0	1.90689	0.137504	4.7866	5.30451	4.64443	0.0976108	6.64515	3.68257	1.02857	5.04221	3.20945	3.33342	0.918386	3.47508	0.238787	4.77505	6.0354	0.0976108	3.07382	8.30319	0.62293	6.43396	3.8125	8.47208
ACH-000439	0.0565835	0	5.56894	2.32193	3.45154	0.536053	0.0565835	4.77347	4.40667	4.59156	1.81147	3.54844	5.70072	0	0.226509	0	2.72683	5.29499	4.13586	3.65191	4.38819	5.47314	7.38672	0.201634	0.0426443	0.0143553	0	4.39232	5.14649	2.88362	0	7.01246	0	0.0285692	1.09761	0.454176	4.19692	1.77821	2.93734	2.02857	3.22188	6.07275	1.03562	0.0285692	6.1235	0.0565835	5.96832	7.75288	7.1918
ACH-001523	4.46597	0	7.58601	3.34483	3.40054	0.344828	1.70044	5.54473	5.59455	4.45286	2.49825	4.07382	4.51979	0.0143553	4.34979	0.0703893	4.6153	6.01748	5.23611	2.21723	5.0054	5.56834	7.83807	0.632268	3.42089	0.333424	0.526069	3.854	6.35966	3.80941	0.163499	7.09022	3.01614	0.475085	0.83996	2.45681	3.15543	2.78241	4.70929	1.08406	3.38267	4.77558	0.31034	0.85599	8.86858	1.07724	5.5373	5.49378	6.95152
ACH-000024	0.0703893	0	7.80568	3.30451	4.16912	4.23496	1.27501	3.55949	3.76022	5.17632	2.49313	4.45154	5.48091	2.76765	0.321928	0.641546	3.43696	4.8485	4.16108	2.87578	5.26266	5.95838	0.669027	0.0840643	0.0426443	0.298658	1.90689	3.0054	5.82757	4.20477	0.0840643	6.84912	0.555816	0.0976108	0.176323	1.14405	4.26379	4.41752	5.97591	0.286881	3.05832	6.66988	0.970854	1.84398	6.80916	0.925999	6.38405	0.201634	7.72492
ACH-000674	4.09424	0	5.49153	2.53107	2.17632	0	0.847997	5.44758	6.67426	4.20242	1.24489	3.91743	4.83794	1.14405	1.31615	7.40718	4.32984	6.33825	4.93263	3.14078	5.2555	5.08023	5.07296	2.59216	2.95977	0.0703893	0.83996	3.92505	7.39429	3.89336	0.0285692	6.85686	0.31034	0.0143553	6.21315	1.9486	3.04963	1.79494	4.98823	0.536053	3.65306	4.70598	0.400538	3.26903	7.38275	2.09085	5.52951	3.51728	7.1235
ACH-000670	3.78346	0.0703893	5.90905	2.50335	3.28244	0.0143553	0.124328	0.286881	3.87184	4.17792	3.21412	4.09424	5.33485	3.1375	4.05745	0.0143553	4.80012	5.44361	5.12019	3.85	5.08491	5.59156	8.23405	0.0703893	0.411426	0.0285692	4.37086	4.25172	6.29627	4.39575	0	6.35297	2.04264	4.96023	3.83188	5.17592	3.69488	0.286881	4.9855	0.650765	4.03474	5.83238	1.38405	2.08746	8.28965	3.10098	6.17493	6.02281	7.36448
ACH-000599	5.28799	0	6.78594	1.68706	3.64847	0.0143553	2.81147	6.71589	4.7021	3.73769	2.58976	2.36737	5.37086	2.58015	2.09424	0.0976108	4.26903	5.27575	4.49506	5.33557	6.11603	6.49346	5.13299	3.27053	0.0565835	0.0426443	0.0143553	4.60229	7.74126	3.67016	0	8.29297	0.0143553	0.903038	4.3505	2.30159	3.45286	0.516015	4.22728	2.01792	3.44626	4.73118	0.344828	0.0143553	6.93121	2.4957	6.26021	5.04963	7.52826
ACH-000263	0.15056	0	6.10957	2.47508	3.93829	0.124328	0.15056	3.87086	4.70543	5.88874	1.40599	2.87774	5.9782	2.35896	1.20789	0.0143553	3.65076	5.36001	5.35826	3.83895	4.91313	6.05028	7.35738	0.713696	0.0285692	0.0426443	0	4.02591	5.50811	4.07468	0	7.36562	2.71809	0	5.79155	0.111031	3.34767	2.37573	4.03386	1.89918	3.61235	7.06727	1.13093	4.22265	6.41701	0.823749	5.59096	7.14832	7.56674
ACH-000303	2.15056	0	6.46597	2.40054	3.39643	0	3.77294	4.45615	5.32948	4.21335	2.85599	3.50843	5.59335	2.0321	0.389567	0.0143553	6.672	8.75064	7.25106	2.82579	5.53636	6.82985	6.96463	3.02503	0.124328	0.15056	3.55582	4.73498	8.25257	4.12846	7.46818	6.39352	0.0285692	1.7137	2.46989	3.19692	3.90207	2.43563	7.03298	6.17931	3.8166	5.72955	0.613532	0.176323	6.74497	0.83996	7.0863	4.23649	7.28392
ACH-001551	5.04089	0	8.05284	1.94111	3.48929	0.0143553	2.47768	5.07039	3.2854	4.36036	1.28096	2.98368	4.93404	1.99639	3.07039	0.333424	4.59156	5.69432	5.02414	2.74846	4.34908	4.95884	5.90521	0.0143553	0.0976108	0.0565835	0.782409	4.25701	5.68004	3.36737	0	7.14812	2.25399	0.669027	2.37295	3.44493	3.83996	0.111031	4.50208	4.40599	3.904	4.94486	0.695994	3.0197	6.0542	1.71809	5.96717	5.20163	6.96324
ACH-000793	5.12598	0	7.25323	1.926	3.64962	0	0.0976108	7.15451	7.17033	3.87184	2.75275	3.99367	5.98596	2.24793	3.05311	3.44228	4.78188	0.15056	4.9364	3.14893	5.42089	6.28503	4.31687	2.37573	3.93357	0.0976108	0.739848	4.49313	7.36641	4.51349	0.226509	7.28614	0.189034	0.238787	5.27426	5.69125	3.774	2.13422	6.01881	3.42223	4.25852	5.27538	0.650765	0.0426443	7.73166	1.70487	7.38914	4.11437	7.77584
ACH-002511	3.72792	0	7.30634	2.8339	3.94298	0.400538	1.84398	4.69711	4.45418	4.14405	3.81455	6.10077	5.37921	0.978196	1.96717	0	3.60288	5.26153	4.14241	2.63459	4.7845	6.14853	8.73708	0.454176	0.0565835	0.0285692	0.0143553	6.67002	6.83378	4.25852	0	4.94813	0.903038	0.0840643	2.38957	3.85798	4.7021	0.201634	5.20867	3.61235	3.49313	6.30816	0.678072	2.07724	6.00652	2.70708	5.69293	4.6094	7.22516
ACH-000286	5.35332	0.124328	6.4363	2.46205	3.9644	0.0143553	2.69599	6.90063	4.86245	3.40871	1.68706	3.20945	4.10266	1.07039	3.20633	2.61353	3.69488	5.66931	4.16832	2.8953	4.916	4.94907	5.81327	0.948601	6.29333	3.32769	0.0703893	4.46532	6.73809	3.39643	7.72914	6.28096	0.0840643	1.07039	3.90977	4.04439	3.41278	1.87971	5.43962	3.79286	3.80632	5.21839	0.201634	1.88362	7.40506	1.30451	5.45878	3.37434	8.15639
ACH-000250	2.94486	0.0285692	6.13031	2.57773	4.08916	0.176323	5.40735	6.82668	6.01659	4.5008	1.1177	1.58976	5.21335	2.75061	1.11103	0.411426	6.14343	6.78738	6.0268	3.29866	6.12081	6.38578	7.74409	0.111031	0.0426443	0.137504	1.5656	2.68706	7.25984	3.94953	0.565597	8.13371	1.7866	0.722466	0.475085	2.82782	4.76182	2.66221	6.62439	7.13617	3.60526	5.53419	1.12433	2.26903	8.12748	1.5008	6.58691	6.14262	7.63699
ACH-000299	3.18903	0	4.5656	2.58976	3.65421	2.90304	4.62117	0.298658	4.36737	4.28021	1.28096	3.64962	5.13996	0.0840643	0.250962	1.79909	3.16511	3.32337	4.9855	4.50653	4.12846	5.56071	7.3587	0	0	0.0285692	0.0143553	5.64875	6.20379	3.60999	0.0565835	6.73904	0.0143553	0.0285692	4.67807	3.16189	3.87971	4.37921	5.32157	4.45943	4.1914	7.09434	0.687061	0.0143553	7.05756	0.0703893	5.51349	6.47119	7.67913
ACH-000139	5.0027	0	5.95629	1.63227	3.93168	0.0976108	2.48027	5.73688	4.19298	4.10769	1.05658	2.74631	5.32085	3.13258	0.443607	0.275007	3.96901	6.13894	4.0635	2.67356	5.91313	6.22014	6.76646	4.43962	0.992768	0.250962	0	3.7126	7.04166	3.62059	0.176323	7.08353	0.137504	0.226509	3.64962	2.7866	2.82985	1.82782	5.39746	4.95513	3.29425	5.71067	0.275007	1.80735	7.10591	1.34483	5.83567	3.44493	6.61721
ACH-001735	0.0285692	0	6.10203	2.01078	3.78869	0.0143553	0.0840643	2.34483	3.94486	3.86394	0.124328	2.50335	4.83693	2.41143	1.48543	0	3.68818	5.55888	5.0798	3.46728	5.36772	5.25701	7.84373	0.0840643	0	0.0143553	1.12433	4.18507	5.47832	3.87578	0	6.27594	0.757023	0.137504	0.214125	0.176323	2.27798	2.17951	2.57773	0.0565835	3.851	6.32912	0.545968	3.18428	7.72383	0.879706	5.79155	5.70293	6.8622
ACH-001389	4.34412	0	6.44278	1.43829	3.17153	0.0143553	0.0976108	4.26529	4.87234	5.11645	3.05311	3.04264	4.88264	4.12598	3.35896	0	4.02148	5.59604	4.60585	3.71039	5.25776	4.91648	7.12598	0.0143553	0	0.0703893	1.75275	3.96809	5.1375	4.02059	0	7.02048	0.978196	1.87184	2.62527	0.0976108	4.30889	0.0143553	4.0054	5.97728	3.8748	5.71589	0.389567	0.695994	7.63285	1.74416	5.76102	4.89191	8.33802
ACH-001183	5.90761	0	7.60592	2.45418	4.64962	0.275007	5.23917	4.67864	5.12887	4.67299	3.22651	4.77663	5.31796	1.42761	4.23802	0.0143553	4.47638	5.00899	5.10811	3.23113	4.82629	6.31578	6.3535	2.90304	0	0.992768	0	3.21101	6.99537	4.01078	0.0703893	6.7866	2.18269	1.09761	3.28392	0.505891	3.37851	1.88362	4.14078	5.82909	3.5741	4.95327	0.378512	0.201634	7.01647	1.86394	5.57077	3.98368	7.66306
ACH-000551	0.0703893	0.0285692	6.35067	2.54102	4.45483	0.0703893	6.27966	5.97269	3.88069	4.07468	3.07211	4.02857	5.50144	0.0565835	1.14405	0	3.75382	6.64126	4.88069	3.0321	5.23993	5.60229	5.66789	0	0	0.263034	0.823749	5.12763	6.59887	4.07639	0.226509	5.94298	1.70044	0	5.68032	3.27501	3.16027	3.82375	5.21412	5.76288	3.85	5.80193	0.815575	0.0976108	7.80174	1	5.84046	4.44493	8.19244
ACH-001163	4.92552	0.695994	6.40854	1.7866	3.29425	0	0.0426443	4.84449	6.52356	3.45812	2.53107	2.78241	6.33271	2.59932	0.356144	0.0143553	4.20789	5.74712	4.08406	2.95791	5.89433	5.3837	5.55857	0	0.0143553	0	0	3.78346	6.22728	3.42761	0	6.16068	0.137504	1.04264	0.659925	4.15137	3.39643	2.7845	7.32859	3.89045	4.05572	5.41616	0.344828	0	6.96775	0.695994	5.91815	5.77847	7.59909
ACH-000037	3.98094	0	6.68131	1.99639	3.59096	0.0840643	1.01436	7.08789	3.92315	4.54473	3.02503	4.15704	6.07767	3.33199	3.49825	0.189034	4.17712	4.55336	4.57531	2.96717	5.92908	5.98527	7.62863	0.15056	0.0976108	0.0976108	2.09424	6.33396	7.37877	3.52105	0.111031	6.54381	1.46467	3.47768	0.659925	0.321928	4.03298	0.422233	4.71644	2.63923	3.60288	6.21276	0.495695	2.24489	6.96081	1.7137	5.79312	2.86987	7.50549
ACH-000744	3.28688	0	5.71699	2.76129	3.7866	0.0703893	1.52105	4.853	6.55459	3.98641	2.24793	4.65076	4.20945	1.89918	2.41684	0.0840643	4.37226	5.73769	5.06996	4.74201	5.52105	4.55949	7.25371	0.201634	0.0840643	0.0565835	3.02148	5.24793	6.63096	3.54844	0.0565835	6.97991	1.17632	6.64169	5.25927	1.04264	3.65764	0.83996	3.69599	3.16027	4.84449	6.79351	0.659925	1.1177	7.52364	1.12433	5.27984	4.8212	7.72683
ACH-000420	5.88582	0	6.55582	2.10434	4.01167	0.0285692	3.35473	5.90231	4.17871	5.07938	2.85997	3.45812	5.89869	2.20477	0.321928	0.201634	4.66789	6.27594	5.01123	3.45943	5.86245	5.78215	7.76646	0.0703893	0.0285692	0.0565835	0.0703893	4.07125	7.96266	4.54473	0.0840643	6.4048	1.55582	3.14893	2.91648	6.30979	4.67976	2.41684	6.33771	7.03397	3.58015	6.37886	0.963474	3.38405	7.6295	0.584963	5.67892	5.12226	6.96278
ACH-000336	0.137504	0	5.12143	2.40054	3.08406	2.27798	0.815575	4.70929	2.34483	4.19928	1.1635	2.55582	4.87578	0.0285692	2.9855	0.0143553	3.39643	4.84147	4.08576	3.55827	4.59335	4.7339	6.44708	0.400538	0.0143553	0.0565835	0.111031	7.21286	6.79377	4.52231	0	6.70791	0.0976108	0.0285692	2.35614	0.389567	2.13422	2.96901	4.05137	0.214125	2.95977	6.61221	0.545968	1.65992	7.41819	2.10769	5.51759	4.30012	8.92636
ACH-000486	4.52105	0	6.55566	2.84197	3.83996	0.189034	4.03738	5.60526	4.48091	3.76129	3.25248	3.84097	5.47411	2.33342	3.78031	0.0840643	3.57046	4.08661	4.52231	4.41616	5.98709	4.63807	5.46434	2.33342	0.0426443	0.0840643	0.263034	4.04352	6.1809	3.95606	2.28392	6.9689	2.31904	2.81147	3.1811	4.24717	3.32048	1.8953	4.18824	6.04898	3.72574	6.8189	0.389567	1.63691	6.7486	0.871844	5.393	4.22651	7.3386
ACH-000679	3.41819	0	5.9404	3.9364	3.39232	0.0143553	0.15056	4.69933	6.8775	5.90063	3.07895	4.66676	5.29278	3.57046	1.926	0.0703893	3.93074	4.11187	4.49633	3.93263	4.96486	5.2407	4.20085	1.52607	3.25248	0.0143553	0.0143553	2.82985	6.74241	3.55949	0.226509	6.05918	0.0426443	0.0703893	5.28021	3.20945	2.53605	2.01792	4.5097	0.526069	3.73444	5.81301	0.495695	1.926	7.00394	2.01078	6.01056	2.06695	7.355
ACH-001557	4.08916	0.0285692	7.14914	2.22033	4.55152	0.0285692	5.65564	5.94837	6.27296	4.21412	3.59096	4.52482	5.49601	0.275007	1.5509	0.111031	4.97177	5.73118	5.26604	2.98185	4.85848	5.0492	8.5416	0	0.0285692	0.298658	2.54597	3.6565	7.8874	4.1643	0.137504	7.05951	0.263034	1.13093	0.475085	2.21412	4.42492	1.88753	5.52638	9.11806	3.64731	4.60999	0.555816	2.94111	7.34279	3.73335	6.22265	6.05961	7.75849
ACH-000247	5.21607	0	5.53885	2.88753	3.63691	0.0285692	0.992768	5.26866	7.64918	4.29278	2.82375	3.58015	4.75596	1.61824	3.95233	0.0143553	4.32697	5.24679	5.36107	3.774	4.32769	5.55336	6.95849	0.62293	7.86487	0.411426	0.163499	6.08767	6.71932	3.47379	6.02591	6.30725	0.176323	0.0976108	5.38888	4.42895	3.36597	1.852	4.81711	5.68706	3.45154	6.22689	0.650765	0.0285692	7.6865	1.09761	5.73579	2.06005	7.4685
ACH-000947	3.97361	0.176323	5.9697	2.60881	3.79701	0.0426443	0.400538	3.21878	4.92458	5.13217	2.71149	3.7939	5.99526	1.79909	4.5735	0	3.72792	5.50335	3.94017	3.69042	6.41886	6.20614	8.41244	0.575312	0.0565835	0.0143553	0.0426443	4.83036	6.43679	4.68089	0.0426443	6.59261	6.32373	3.58015	1.81967	5.95163	4.10518	1.63227	4.10685	5.22766	3.74524	6.49617	0.163499	0.0426443	8.03309	3.72465	6.96405	3.43162	8.1297
ACH-000807	4.24108	0	7.14425	1.68257	3.48027	0.0143553	0.389567	6.17951	3.46597	3.68594	2.33056	3.86691	5.69181	2.67582	5.10182	0.111031	4.38957	5.90497	5.07125	3.23266	6.97235	4.81096	9.28221	0.0143553	0.0426443	0.0426443	0.0565835	5.45845	7.59924	3.30889	0.124328	6.65435	0.475085	6.09445	3.01614	4.97499	3.854	0.422233	5.20477	1.9486	3.65421	6.03892	0.389567	1.72247	8.17373	3.93923	6.06415	6.75007	8.0706
ACH-000476	4.38059	0	6.35244	2.29278	3.65306	0.0285692	5.12019	5.60733	4.03386	4.22265	2.69822	3.61117	4.9514	2.04264	6.02148	0.85599	6.12267	6.12102	5.79649	3.7939	5.72356	5.56102	0.565597	1.53107	0.0143553	0.0840643	2.45943	4.6017	7.7387	4.31252	0.189034	7.04023	2.35614	0.847997	2.57289	3.8846	4.63169	1.69599	5.14568	5.22188	4.14241	6.19081	0.137504	1.52105	7.12701	0.903038	6.56636	5.89166	7.5313
ACH-000525	2.48543	0	6.45483	2.14405	4.08576	0.0426443	0.0143553	4.1334	5.28318	5.01302	3.36457	4.26153	5.90328	2.66221	4.8802	0	4.12184	5.6851	5.34447	4.47119	6.40803	4.76341	6.14119	1.65076	0.111031	0.0976108	0.0143553	4.44626	4.38612	3.83086	0.378512	5.09635	0.0840643	3.73769	4.71754	5.50684	4.52168	0.0285692	2.79909	0.443607	4.05224	5.8296	2.95977	0.0703893	8.05018	5.32841	6.38422	6.13914	7.48325
ACH-001148	0.356144	0	7.30451	2.45681	3.7301	1.04963	3.36317	2.47249	4.74147	4.20867	3.69933	4.99141	4.95977	2.87184	0.344828	0	4.6094	5.29352	4.90207	3.22651	4.46923	4.65592	8.26608	0.678072	0.389567	0.0976108	0.367371	6.2709	6.00405	4.03034	0.250962	6.79116	0.201634	0.0143553	1.80735	0.0703893	1.81147	2.96347	5.55857	2.24489	3.0993	6.07596	0.536053	0.0285692	7.16722	3.54597	5.93475	6.91815	7.1469
ACH-000853	4.64501	0.0426443	6.85686	1.88753	3.84499	0.0840643	0.722466	6.24527	4.54597	4.57894	3.20945	3.44228	6.06134	1.30451	2.96162	0.0285692	4.62059	6.0542	5.23228	2.25399	6.25039	5.59305	8.4211	0	0.0426443	0.0703893	0.773996	5.51159	7.54496	4.19613	0.31034	6.84937	0.321928	3.62293	0.575312	4.93687	5.33056	0.333424	6.42408	4.70487	4.20242	6.1981	0.565597	0.214125	8.07585	4.19456	6.45631	6.76434	7.18626
ACH-000083	3.93168	0	5.79025	2.17313	2.9782	0	5.35368	6.76646	4.56377	4.0268	3.51728	5.86913	4.61824	0.815575	1.58015	0.263034	4.80271	5.43863	4.40395	2.63459	6.09022	5.8679	9.69232	0	0	1.23879	0.189034	4.28021	8.61069	4.29057	0.0703893	6.52466	0.475085	0.0565835	0.536053	0.879706	4.61176	0.263034	5.31179	4.90929	3.43429	6.539	0.475085	0.0285692	7.3786	2.64155	6.22265	5.37747	6.96694
ACH-000479	4.70099	0	6.39283	2.09085	3.86096	0.356144	5.96371	6.96174	3.35755	4.13422	1.97453	3.91552	5.30049	3.72574	5.70377	0.0976108	5.51191	5.85449	5.67723	3.45418	6.80012	6.30943	9.28944	0.176323	0.15056	0.847997	2.40327	4.66505	7.41058	4.4121	0	6.76792	3.30159	0.847997	1.4489	5.36001	4.68257	0.321928	5.51854	4.65306	4.0045	6.69084	1.05658	0.124328	8.13355	3.42492	6.48301	7.68236	7.32814
ACH-000230	3.72028	0	5.5435	1.58496	1.26903	0.0426443	4.12681	6.55536	3.78136	2.46989	2.25096	4.62644	3.63691	2.93734	2.65764	0.0143553	4.05832	4.30889	3.35614	1.70487	5.68678	4.92029	9.9655	0	0	0.226509	0.15056	3.03386	7.3057	3.98459	0.124328	5.51065	1.27501	0.925999	0.0565835	1.96717	3.20945	0.650765	5.96648	5.70072	2.8679	5.20006	0.555816	0.0565835	6.65693	1.51096	5.21296	3.87086	6.92778
ACH-001664	5.07767	0	6.59574	1.84398	3.55336	0	0.15056	5.37643	6.39985	4.25172	3.09255	3.60051	5.56163	2.17951	2.04963	0.111031	3.76977	5.60229	3.64847	2.96717	5.77847	6.13566	5.82094	0.584963	0	1.1635	0.163499	3.46858	6.02945	3.98368	0	6.31777	2.40871	1.1375	4.21801	4.82375	4.03122	2.19535	4.86888	6.05333	4.08066	4.98687	0.238787	0.321928	7.45171	2.16672	6.1645	4.25701	7.43621
ACH-000955	5.35685	0.286881	5.86047	4.05658	4.78503	0.0426443	1.71809	5.00405	5.78084	5.09635	2.47508	3.849	5.45812	3.04789	0.659925	3.88166	4.39025	6.49506	5.06393	3.90014	5.09297	6.63125	6.42744	1.83996	1.88753	1.87578	0.0143553	4.16511	7.30131	3.70708	1.02148	6.77716	2.53356	0.941106	5.94837	5.08534	3.7137	0.807355	4.38059	0.226509	3.87184	6.6279	0.356144	0.0285692	7.28337	2.64155	6.12391	2.94111	7.42828
ACH-000049	5.01212	0	6.455	2.0321	4.05745	0.0285692	2.82171	6.31506	3.5008	4.40054	2.26303	3.40735	5.27053	2.91073	3.32048	0.0840643	4.14649	4.69766	4.63227	3.21723	5.71232	5.25927	7.82165	0.263034	0.0426443	0	0.594549	3.79494	7.05039	4.26379	0	6.68804	2.30451	0.0976108	2.35614	2.85997	3.94579	1.32193	5.5656	4.19771	3.56438	6.53854	1.07039	1.60407	7.33396	1.46467	5.55152	5.83618	7.50875
ACH-000675	5.65964	0.286881	6.26959	1.926	3.78241	0	5.34908	7.54125	7.15664	5.13504	2.41414	4.80993	4.91886	4.78084	3.16993	0.0285692	5.01659	5.53978	5.12019	2.67582	6.45598	5.51979	6.93864	1.36737	5.70598	0.111031	0.978196	4.23189	7.60822	4.07296	3.70708	6.72724	1.70487	0.555816	4.71039	5.17513	3.52732	2.27501	4.94158	5.86047	4.27128	6.20046	0.823749	2.58496	7.55029	2.40871	6.30925	7.05517	8.07532
ACH-000199	3.66448	0	5.63546	2.03914	1.42761	0.111031	3.9241	5.72656	4.47314	2.87184	2.44361	6.01011	4.10014	2.6017	1.50589	0.495695	4.66846	5.13134	4.65019	3.21568	6.24926	5.94322	9.24902	0.0976108	0	0.226509	1.82375	3.37851	8.20721	4.40667	8.40178	5.71039	2.66903	3.25701	0.275007	3.32337	3.78031	1.22033	5.3978	5.4793	3.70155	6.66562	0.748461	0.201634	7.12763	4.23879	5.87086	6.85075	6.56423
ACH-000193	1.07724	0	5.9028	2.52607	3.89045	4.52356	0.250962	3.64847	5.14975	4.53978	2.16027	3.33771	6.33825	3.39369	4.35332	1.32769	3.93074	6.59872	5.19967	3.72683	4.88509	5.56499	6.43546	0.443607	0.0565835	1.21412	0.831877	4.50144	6.40088	3.32481	0.0565835	6.20848	1.91073	0.0143553	0.847997	0.0703893	1.70929	3.29278	3.9222	0.475085	3.1177	6.72846	0.85599	0.0143553	7.01179	1.25096	5.73904	0.739848	7.20672
ACH-000538	4.0798	0.0285692	6.37886	2.33628	3.46989	0.0143553	0.356144	4.84248	3.81044	5.07039	2.0036	2.26604	5.62527	0.250962	3.11936	0.613532	4.16511	5.43429	5.12681	4.27426	5.36142	5.83618	7.08257	0.0840643	0.0143553	2.99458	0.15056	4.44493	6.11707	4.52356	0.111031	6.36597	0.275007	0.250962	0.201634	4.93452	4.64039	0.124328	4.65878	1.7866	4.81096	7.04188	0.970854	4.6311	8.00613	3.95327	6.32805	4.52042	7.19121
ACH-001647	0	0	5.87823	2.33628	2.86394	4.78607	0.0426443	5.03606	3.78973	3.8339	2.04963	3.09761	4.73715	1.68706	0.815575	0	3.28244	4.75435	4.89336	2.70708	3.75275	5.13134	7.0468	0.0143553	0.0840643	0.0143553	0	4.39232	6.00742	3.74524	0	6.66121	0.214125	0.0285692	4.22265	4.10685	2.70929	2.6017	4.79233	2.83188	3.65076	6.16772	2.26303	0.0426443	5.77979	1.82782	5.0505	7.24365	7.75335
ACH-001649	4.64674	0	7.00326	2.26003	2.64386	0.333424	5.52482	5.3067	7.51065	3.56803	2.95606	4.83289	4.30086	0.495695	5.4219	0.0143553	3.7148	6.67087	4.82018	2.87774	5.58886	4.16269	7.12319	1.20163	3.64962	0.0426443	0	3.01614	6.05007	3.3799	0.604071	5.65249	1.97085	1.89142	1.68706	3.23726	2.95233	1.7137	4.80012	3.32625	4.30889	5.06953	0.176323	0.505891	7.00686	1.73552	5.49442	1.96347	7.55612
ACH-000155	3.79909	0	7.39506	2.10098	3.64039	0.765535	3.6837	5.68846	4.15137	4.36737	2.06005	2.82171	4.63227	2.27202	2.42492	0.137504	3.69377	3.93357	4.38405	3.45812	6.85487	5.89821	7.33029	3.21257	0.111031	2.56316	0.111031	5.4941	8.12164	3.43696	0.0565835	6.52544	0.163499	0.910733	2.36457	1.19535	4.32409	1.62293	4.81609	3.37712	4.05918	6.05983	0.555816	0.678072	7.06253	1.54597	7.13761	5.20672	7.5738
ACH-000270	4.82833	0	5.47411	2.80529	2.96162	0.0285692	4.14486	5.19417	8.36846	3.81558	1.75702	3.07724	3.48414	1.51096	0.83996	0.0285692	4.54967	5.24831	5.07039	4.2817	4.54597	4.02857	5.09508	1.48543	0.176323	0.163499	0	3.39094	5.95047	3.54597	0	6.85624	0.475085	2.14405	5.42358	1.24489	3.18745	1.58015	4.43962	5.84975	4.05658	8.01436	0.83996	0.0565835	6.95641	1.36737	4.43296	4.52293	6.40429
ACH-000683	4.85798	0	6.14649	2.61824	3.34908	0	0.275007	2.9782	7.8301	3.60526	3.23573	4.33128	4.90352	2.87578	4.29205	0.298658	4.11853	5.45943	4.77873	3.5509	5.55182	5.15664	5.29572	0.298658	0.214125	0.0840643	3.22033	3.88753	5.73417	3.97545	0.201634	6.68271	2.90111	2.18903	4.26228	4.61058	3.54967	1.4489	3.89433	1.80323	4.01436	5.69711	1.04963	1.44361	7.22371	0.831877	6.13832	5.29315	7.46156
ACH-002017	5.20555	0	6.47638	2.09424	3.29866	0	0.189034	6.61162	4.42358	4.17153	0.111031	2.90111	4.61706	2.09761	0.941106	0	4.22419	6.58241	5.49378	2.90881	3.26303	5.96947	5.50016	0.0703893	0	0.0565835	0	5.28799	4.46009	4.26228	0	7.74113	1.53605	0.454176	2.58976	3.08236	3.64501	0.124328	4.91839	3.13914	4.57228	5.24869	0.176323	3.1127	6.61809	0.31034	5.765	4.848	7.30515
ACH-000655	4.75221	0	6.22959	1.77821	3.41007	0.0285692	1.0635	5.70404	3.61471	3.61117	3.08576	4.0365	5.88435	0.9855	1.18269	0.111031	3.90881	5.70155	3.78973	3.14078	6.64775	5.78031	10.097	0.0143553	0.0143553	0.137504	1.29866	4.86493	7.50573	4.5735	0	7.23381	1.76129	4.42626	0.275007	3.03914	4.99684	0.545968	5.00675	3.92695	2.97636	5.85599	0.704872	3.89724	7.66085	3.17951	6.51995	2.93923	8.16179
ACH-000145	4.9991	0	6.46597	1.9222	2.69377	0	2.4957	6.21451	3.32193	4.27798	3.16027	5.10685	5.97636	0.632268	2.19849	1.20789	5.06048	4.99458	5.13052	3.63575	6.68243	5.67864	8.28891	0.0840643	0.0426443	1.60881	2.37851	4.57228	6.81057	4.13175	0	6.15462	0.422233	0.505891	2.61353	3.48156	3.8125	1.66903	4.50016	5.89166	3.94673	6.75007	0.367371	1.21412	7.60918	2.23573	5.9241	3.47638	7.64443
ACH-001495	5.65076	0.31034	7.0376	1.9782	3.64155	0	3.25852	5.25096	4.0365	3.32481	2.08746	1.95606	6.15886	2.33342	5.61883	2.51349	3.14568	3.66903	3.59096	2.91265	4.58135	4.61412	5.76155	0.124328	1.1375	0.124328	2.65535	3.90881	6.0881	3.53232	0.925999	7.53652	3.35191	0.201634	3.51979	3.35191	3.04264	1.38405	5.03738	4.17393	4.34127	4.04352	0.443607	1.53605	7.01937	1.59455	6.65277	5.5598	7.60407
ACH-000188	3.54473	0.0143553	5.34518	1.24489	3.13586	0.15056	4.16832	4.64039	4.29205	3.17313	3.07211	4.31107	4.5472	0.0143553	4.28762	0.0426443	3.1375	3.52607	3.46336	2.37016	6.36475	5.07852	7.22333	2.20163	0.201634	0.189034	1.66448	4.81762	6.27761	2.79494	0	5.86542	2.35896	2.88947	0.0143553	1.83188	2.76977	1.926	4.02503	4.50526	2.13093	3.92505	0.0976108	0.464668	6.69697	0.0703893	5.18745	1.23266	6.76474
ACH-000080	0.275007	0	5.97613	3.19535	4.35896	6.88679	0.0703893	4.29278	3.98641	4.08491	1.1177	2.95233	5.78241	2.58015	0.238787	0.0565835	4.17712	5.06867	4.44559	2.96717	5.41752	6.76328	7.79481	0.201634	0.0285692	0.15056	0.731183	4.93876	5.97568	5.93334	0	6.88118	3.47249	0.0285692	2.91073	2.7137	2.98914	2.60407	6.59917	0.443607	3.76129	6.69139	0.389567	0.0143553	6.84122	2.75061	5.91073	0.263034	7.70404
ACH-000146	1.26303	0	5.80864	2.50589	4.25399	3.02326	0.0840643	5.98231	3.75596	5.36072	2.44361	3.80632	6.17971	2.0635	2.42492	0.0285692	3.60881	4.97131	5.02945	2.88557	4.94111	6.15826	7.74994	0.0285692	4.47573	0.0426443	0.367371	5.53605	6.06996	4.37573	2.02857	6.67186	1.42223	0.0426443	4.35755	1.0072	3.01257	2.41684	4.89191	0.669027	3.29131	7.27128	0.871844	1.62293	6.2149	1.42223	5.87307	6.8857	8.67976
ACH-000415	4.32912	0	5.11228	1.31615	2.02857	0.495695	0.992768	4.47638	3.94579	2.63923	2.39232	4.87234	4.14486	1.25701	3.75168	0.0703893	2.97269	3.71589	3.30743	1.91456	4.90304	3.36317	5.6014	0.748461	0.298658	0.0426443	0.0426443	3.99095	5.29278	2.19849	0.0565835	5.56133	1.70044	0.238787	1.78241	3.70708	2.01078	1.59455	4.82171	1.50589	2.18903	4.19377	0.263034	0.847997	6.50048	0.411426	4.69098	2.79494	5.92955
ACH-001518	5.40429	0	6.19554	1.83592	2.15704	0.0840643	0.333424	6.0691	5.64789	4.16027	3.12763	3.50335	4.76022	2.45681	5.05572	0.0840643	4.33557	4.73118	4.65707	2.81967	3.40871	5.79181	4.34908	0.0285692	0.344828	0.0285692	0.137504	4.61058	6.00787	3.82171	0	6.40769	2.25096	2.71589	4.45549	4.44824	3.69933	3.12928	4.56621	5.99594	3.46597	5.87504	0.400538	0.411426	7.00371	0.286881	6.06738	4.26078	7.4192
ACH-000891	5.21023	0	6.56651	2.53356	4.16027	0.0143553	4.47897	6.6585	8.83343	5.08194	3.06005	4.59096	6.29939	3.31034	1.99277	0.0565835	4.29278	5.03122	4.16511	3.2032	6.31325	7.1336	7.95855	0.0840643	0.0565835	0.0703893	3.19377	4.54164	7.38586	4.13093	0.0703893	7.12412	2.49313	2.04264	3.55336	3.38128	4.14323	2.59694	6.4138	4.98048	3.86394	5.81429	0.15056	1.1375	6.71521	0.526069	6.20672	4.33914	8.07328
ACH-001625	5.02503	0	7.15826	1.70487	3.84599	0.0565835	3.12928	6.30979	6.46205	3.96901	3.74631	5.14853	5.45746	0	2.86592	0	4.60051	7.296	4.80787	2.68257	6.44493	5.69377	8.18691	4.07296	0.0285692	0.0565835	1.33914	3.14893	7.31406	4.05572	0	7.10643	3.95047	0.516015	0.286881	0.687061	3.774	1.19535	3.88264	1.21412	3.15056	4.18269	0.238787	0.782409	7.1103	0.411426	6.94169	1.81967	7.49857
ACH-000895	3.91169	0.176323	5.71205	2.71809	2.90111	0.0565835	0.124328	5.44195	5.28021	3.95699	3.02857	4.44758	4.98368	2.9542	2.1375	5.16832	3.93546	5.72165	4.51475	4	5.03078	6.3844	6.95233	1.72247	4.81198	0.0426443	0.15056	4.94017	7.04111	3.34908	3.5509	6.37869	1.54597	0.475085	5.63314	2.4489	3.95977	2.61353	4.18903	2.15381	3.52105	6.29976	0.669027	0.378512	7.6091	3.14241	6.37347	3.32048	8.33427
ACH-000851	4.21878	0	6.04374	2.39506	3.40463	0.0565835	0.176323	5.15906	6.18488	4.12928	2.24489	2.33056	5.01659	2.95233	3.26003	0.0976108	3.43029	4.90785	3.53854	3.4489	4.82171	4.68145	6.65378	0.250962	0.0285692	0.0143553	0.250962	4.33056	6.17353	3.30889	0.0565835	6.18051	0.678072	2.79077	5.05485	4.8885	2.80735	0.163499	4.42492	0.0143553	3.72792	5.36001	0.443607	2.58736	6.91636	1.23879	5.59962	7.16792	7.2503
ACH-000824	4.96855	0	6.73023	2.40054	4.07125	0	3.27053	6.29921	6.70196	4.14812	2.37016	3.53481	5.35403	0.0285692	5.18468	0.111031	3.72465	5.99277	4.41886	3.82375	5.41177	4.19219	5.92529	0.925999	0.176323	0.189034	1.23879	3.61706	6.99277	3.68706	0.124328	6.42021	3.15218	1.12433	0.31034	3.13258	3.44361	2.38957	4.37851	4.54659	3.9542	5.89166	0.464668	1.04264	7.10905	1.27501	5.86295	4.37295	7.6512
ACH-000506	4.51412	0	7.15816	1.95606	4.35191	0.0565835	0.214125	6.79299	4.71205	5.61383	1.02857	3.9855	5.69877	3.60288	1.96347	0	4.49121	6.14425	5.2075	3.5435	6.94251	5.47735	2.18587	2.67807	1.79909	0.15056	0.400538	3.39506	5.17513	4.62761	8.31985	6.23055	6.26754	3.10266	7.68545	5.72165	3.21568	0.0840643	4.89869	0.263034	3.88069	5.32841	4.0018	1.54597	8.08979	4.59096	6.74174	5.58346	6.97945
ACH-000540	3.99005	0	5.97384	2.28392	1.93357	0.0703893	5.27724	6.39968	4.15137	3.51096	2.88557	4.79753	4.47768	0.189034	2.49057	0.201634	4.64212	4.75649	4.50843	3.43162	6.00225	5.56163	9.6151	0	0	0.263034	0	3.8125	7.76122	3.94298	0.15056	6.05658	2.21412	0.0703893	0.632268	2.23879	3.99095	0.422233	5.18824	4.47703	3.57046	6.58752	0.485427	0.0285692	7.34279	2.89336	5.94462	5.48253	6.87615
ACH-000061	0.0976108	0	6.08491	2.72465	4.29866	0.0285692	0.0840643	3.92315	4.63749	4.0365	3.40463	4.27277	6.0045	2.47249	0.0703893	0.163499	4.50779	5.35755	4.78921	3.72137	5.58256	6.32157	7.44973	0	0	0.124328	0.0143553	3.97269	6.34483	4.72247	0.124328	6.89542	0.0143553	0.0976108	2.60881	0.536053	3.01257	0.137504	6.6565	0.454176	6.01056	6.54396	0.948601	0.0285692	7.06598	4.06609	6.48591	0.555816	8.09154
ACH-000185	3.98641	0	5.81839	2.43563	2.0321	0	5.29425	6.30979	3.97453	3.8748	3.16672	5.28244	4.42358	1.87578	4.79805	0.475085	4.83794	4.96993	4.63401	2.98003	6.13217	5.88533	9.84274	0.505891	0	3.02326	0.214125	5.67807	8.14379	4.18745	0.238787	6.57546	0.956057	0.731183	1.78241	1.07039	4.65076	0.632268	4.74093	5.90929	3.53481	6.28337	0.443607	0.411426	7.31198	2.46205	5.91073	6.79116	6.8695
ACH-000568	3.02503	0	7.6494	2.28688	2.72247	0.0976108	0.15056	4.53356	3.38543	4.01792	1.8679	2.1177	4.77294	2.81762	5.68482	0.584963	3.24489	4.49442	4.52982	3.98459	5.16269	3.83188	6.7137	0.0143553	1.83188	0.495695	0	4.14241	7.61537	2.45154	5.94392	4.54844	0.0143553	0.584963	6.31868	5.06953	2.64847	0.495695	1.77821	2.95791	3.33342	6.98151	1.50589	2.73769	7.02026	2.32769	5.86938	6.90989	6.0798
ACH-000707	0.15056	0	6.05875	2.48543	4.15462	5.93687	0.0426443	2.7137	4.47184	4.904	2.41414	2.81558	6.13607	1.93357	0.367371	0	3.84097	4.51286	4.88899	5.05007	4.70155	6.98857	4.13422	0.0143553	0.0143553	0.0976108	0.0285692	4.43696	6.34589	3.82579	0.0565835	6.65005	0.0703893	0.176323	1.58496	1.74416	1.84398	0.0840643	3.28688	0.250962	4.41549	7.65814	0.389567	0.0565835	7.00236	3.10266	6.63836	0.748461	8.54763
ACH-000603	0.910733	0	5.74012	2.50589	3.16189	0.0285692	0.0703893	5.32841	5.69404	3.96993	2.95977	4.57046	5.01792	3.72137	2.45154	0.238787	3.33914	6.04308	4.19849	2.93546	5.69933	5.09043	9.44611	1.09085	1.45418	0.176323	0.176323	4.27352	7.09128	4.32121	1	6.42089	0.226509	2.79701	7.16259	5.58767	3.92125	0.0840643	4.22497	4.44361	3.0036	5.33557	1.22651	3.75275	7.31805	3.42089	4.80168	5.60377	6.7003
ACH-000983	1.50589	0	6.3361	2.58496	3.7137	0.0703893	6.42021	5.45187	4.55827	5.09761	3.47897	4.23955	5.63633	0.0285692	0.31034	0	3.49313	5.61706	4.34908	3.62293	5.824	6.50764	7.0993	0	0	0.0285692	0.0143553	5.90014	6.42626	3.91073	0	6.93711	3.51854	0.344828	3.15381	3.6427	3.42223	3.52732	4.73118	3.87381	3.75489	6.97235	3.99367	5.57773	7.32634	0.31034	6.33181	5.3978	8.25196
ACH-000541	1.04264	0	6.19908	2.37016	3.8125	0.124328	2.56803	6.31687	4.46467	4.47573	0.475085	4.33271	6.29186	3.18745	0.0426443	0.454176	4.51665	6.40207	5.46303	2.97085	5.00315	5.98185	5.38647	0.0703893	0.895303	0.176323	0.321928	2.9982	5.69488	4.11936	0	6.904	0.378512	0.0840643	0.604071	0.650765	3.12928	4.44294	6.29866	0.137504	4.16269	6.05072	1.29866	3.20477	7.3565	3.04614	6.6659	0.650765	7.84204
ACH-000680	4.91839	0.879706	6.86196	2.92979	3.74739	0.0143553	0	5.64299	5.61383	4.66732	2.28392	3.75916	4.337	2.852	3.05832	4.38957	4.23726	6.50668	4.9364	3.25399	5.55674	5.20555	8.58184	1.05658	6.07146	0.0285692	0	5.83719	6.74349	3.6241	5.03122	5.99186	0.0976108	0.739848	5.39506	4.32841	3.97453	2.81967	4.93782	2.07382	4.65363	6.49137	0.678072	3.03562	7.8296	2.62527	5.8679	4.11103	7.62264
ACH-002460	3.49953	0	7.78973	2.22342	3.39232	0	4.0197	6.19101	4.56255	3.91169	2.07039	4.64559	4.18031	1.07724	1.28688	0.0426443	4.5509	5.12639	4.62059	3.3505	4.96162	5.67976	8.58372	0.124328	0.0840643	0.0143553	0.887525	3.56682	6.12267	3.80012	0	7.68545	1.65076	1.33342	3.29866	3.30012	3.69599	1.88362	4.67073	5.24108	3.78346	6.12825	0.333424	0.678072	7.0268	3.57531	5.87455	5.06953	6.98755
ACH-000111	5.86962	0.176323	5.50239	3.09592	3.74416	0.0840643	0.111031	3.99277	5.48543	6.13627	1.46989	3.13422	5.38957	1.14405	4.36807	0.970854	5.83845	6.25361	5.4192	4.46989	5.81378	6.10769	5.30998	0.422233	0.0426443	0.0565835	0.400538	4.69822	6.4261	3.83895	0.555816	6.63169	2.852	2.17951	4.53543	5.85773	3.76341	0.422233	4.65992	0.263034	2.90304	6.45763	0.432959	0.0976108	8.31927	0.773996	5.51759	5.69377	7.64645
ACH-002463	5.21062	0	5.97246	1.8679	2.36737	0	7.6108	6.28725	3.66789	3.4957	2.41143	4.09085	4.36877	0.485427	6.00405	0	4.42358	5.07296	3.94017	2.67356	5.64933	4.73118	7.76553	0.137504	0	0.0565835	0	2.96347	6.73457	4.10014	0	6.32571	2.88362	1.07724	0.333424	4.33485	3.62761	0	4.72083	5.62	3.16189	6.10077	0.464668	0	7.30095	3.849	5.90761	6.2426	7.09445
ACH-000369	0.238787	0	6.28337	2.28392	3.64616	1.81967	5.80632	5.44493	6.07682	5.22843	2.68482	3.82883	5.83618	2.848	0.584963	0.0565835	4.1914	4.89288	5.29793	3.92029	4.9991	5.18626	7.03243	0.0565835	0.0703893	0.0143553	0.0565835	6.19731	6.06091	4.13504	5.03694	7.50621	0.485427	0.0426443	4.80787	0.956057	3.98368	4.12681	6.58811	4.71918	3.98914	6.58601	0.731183	0.124328	7.34855	0.226509	6.34056	5.94673	8.29186
ACH-000618	4.79286	0.0143553	7.40395	2.24793	3.52105	0.163499	4.06178	6.16993	6.48446	3.91743	3.75916	5.96139	4.67356	2.09761	6.76208	0.0143553	3.926	6.06026	4.33985	3.27947	6.67835	4.23726	6.83276	1.848	0.669027	0.124328	0.584963	4.63459	7.10559	4.0009	0.678072	6.58961	3.55949	3.7366	0.286881	3.04963	3.40735	1.46989	4.58256	3.72465	3.58856	5.77979	0.263034	1.81558	6.87197	2.02857	6.0864	2.90304	7.73545
ACH-000470	3.68145	0	7.2949	2.40054	2.85	0.956057	0.238787	6.02857	5.86839	3.86691	2.774	3.7126	5.20203	1.84398	2.88166	4.47184	3.43429	5.71342	5.10014	3.20163	4.98322	5.67638	7.00619	1.70487	4.70377	0	0.0143553	4.82018	6.64947	3.48027	4.26379	6.32157	0.0565835	0.214125	4.79857	3.75382	3.65764	2.79494	4.94392	4.15056	3.77505	6.1469	0.201634	1.15704	7.37252	2.52105	6.26134	2.94111	7.85767
ACH-002039	5.8846	0	8.09027	2.45943	3.60288	0.189034	5.35085	5.779	7.4176	3.7301	2.87381	3.81558	5.48929	1.07724	4.53978	0	4.78816	6.01592	4.83693	2.93357	4.26153	4.75809	5.09677	1.79494	2.488	0.659925	0	3.25399	6.64559	4.59156	0.0426443	6.72901	2.30159	1.95233	4.0505	1.848	3.10601	2.08066	5.07082	6.1914	3.48027	4.84549	0.111031	0.124328	6.69293	2.54102	5.94743	3.27202	8.06447
ACH-000118	4.45549	0	5.66107	2.23879	3.81967	0.0143553	3.42492	5.51159	3.48929	3.7866	2.81762	4.86691	5.45779	2.93168	4.63401	0.238787	4.51096	5.24565	4.69377	3.93168	5.77795	4.61176	7.01781	3.23573	1.04963	0.432959	0	4.52105	6.52089	3.46728	0.0976108	6.50938	0.0565835	2.65764	4.10936	4.27798	3.70377	1.76129	4.26903	6.51633	3.26303	6.44725	0.443607	2.27798	6.70833	0.632268	5.27426	3.01436	8.23592
ACH-000614	4.98094	0	7.30478	2.53605	3.44493	0.0565835	0.526069	5.00944	3.95327	4.85	3.17792	4.44692	5.53699	0.0426443	0.344828	0.918386	5.00899	6.14445	5.32697	3.27053	5.72683	5.66732	8.22284	0.871844	0.0426443	0.15056	0.941106	6.71699	5.66931	4.01525	0.0285692	7.54982	1.09761	0.0703893	3.7301	5.14893	5.08746	2.98368	5.81121	1.93734	3.70266	6.23688	0.604071	2.45681	7.11666	3.36737	5.91982	3.58135	8.10177
ACH-000432	0.0703893	0	4.64328	1.64155	2.68706	0	2.42761	0.163499	4.61176	5.23879	1.29278	3.96255	5.87283	0.0285692	0.0426443	0.0285692	3.99186	4.67582	4.74201	5.06996	4.17393	5.94392	6.60644	0	0.0565835	0.163499	0.807355	5.31578	5.32337	2.72247	0.15056	6.63735	0.0143553	0.124328	0.565597	1.24489	2.07382	3.49825	2.74416	0.895303	3.48027	8.20315	0.344828	0.0565835	6.3966	0.263034	5.53481	7.33226	8.16068
ACH-000556	3.76977	0	7.37008	2.44626	3.51349	0.0285692	0.378512	6.45828	4.80219	4.12598	2.84398	4.1643	5.52262	0	3.46205	4.0045	5.18507	5.9697	5.92148	4.23036	4.93829	6.09149	8.09729	0	0	0.0285692	2.25399	3.99277	6.91289	4.15785	0.0426443	7.23132	1.73118	1.90689	0	2.95047	4.34837	3.12433	5.40905	5.60437	4.06695	6.79142	0.918386	1.75275	8.01173	5.58436	7.04843	4.39025	7.76454
ACH-001804	4.93499	0	6.63546	1.92979	2.50335	0	4.88362	6.77255	3.88947	4.13996	3.25399	4.09424	4.45878	0.0703893	0.978196	0.669027	4.51791	4.9331	4.77979	1.97453	5.91982	5.88923	9.92825	0	0	0	0.238787	3.26754	6.53403	3.41954	0	6.21082	1.18269	0.189034	0	0.823749	3.1375	0.847997	3.853	4.0009	3.04439	5.13996	0.773996	0.0143553	7.75114	2.30159	5.50843	4.58976	7.24603
ACH-001386	3.06005	0	6.83769	2.47249	4.57168	0.0285692	0.0565835	5.20906	5.60526	5.34483	3.97545	5.04876	5.14608	5.44394	1.87184	0.389567	4.96947	6.24146	5.54936	3.13093	4.2817	5.824	0.0565835	1.36177	0.0426443	0.15056	0.0565835	3.42626	4.13011	4.25852	0.782409	5.01703	0	0.378512	6.34234	4.23036	3.58496	0.163499	4.21956	0.0976108	4.56316	5.41346	3.6837	0.992768	8.46565	5.07339	6.51932	6.49041	8.20467
ACH-001060	0.0143553	0	6.94193	3.40463	4.80478	3.33914	0.83996	4.16189	5.31868	4.96162	3.62059	3.75809	5.83744	3.70708	0.0285692	0.0285692	3.98003	5.1807	5.11312	3.0018	5.48285	7.0846	1.78241	0	0.0565835	0	0.0143553	3.94953	6.18329	4.916	0.201634	6.76699	0.0426443	0.0285692	3.88655	0.0565835	2.3978	3.10098	5.29976	0.948601	3.78869	5.24982	0.411426	0.0143553	6.76195	5.06652	7.20916	1.84398	8.30588
ACH-001525	4.26754	0	6.84436	2.01792	3.89724	0	1.1177	5.26604	4.37086	3.76235	1.42761	2.78241	3.83289	0	3.30305	0	3.11103	5.1639	3.848	3.61117	4.38681	4.9514	5.63081	0.263034	2.28688	0.0565835	0.790772	2.28096	5.43363	3.45286	0.15056	6.47281	1.22651	1.96347	2.66448	2.20163	2.19535	3.3147	4.72683	0.748461	3.31179	5.20124	0.137504	0.695994	5.96855	0.226509	5.11853	3.75382	6.76022
ACH-001539	0	0	5.70293	3.45418	2.488	6.89445	0.0703893	1.90304	4.4522	3.50462	1.68257	2.9486	4.42156	2.21101	0.422233	0	3.09761	5.82375	3.42895	2.60881	4.11103	6.21237	4.97636	0	2.9486	0.0426443	0	3.45812	6.08746	3.41278	2.90689	5.46532	1.31615	0	1.78241	1.70929	1.78241	1.09085	5.70874	0	3.61471	4.67976	0.298658	0	7.04996	0.641546	5.73145	2.38957	7.44973
ACH-000014	3.55459	0	7.49586	2.38957	3.65076	0.0565835	0.250962	6.30305	4.28983	4.23649	2.63227	5.24413	5.3466	1.24489	0.659925	0.201634	4.8802	5.73606	5.53854	3.69822	5.82706	6.05289	8.44919	0.0976108	0.137504	0.226509	2.43296	7.0091	6.45302	4.67525	0.201634	7.63038	2.43029	0.555816	2.852	4.57894	4.1635	1.50589	4.4822	1.20163	4.21956	6.14547	0.584963	1.36737	7.6637	3.83895	6.79597	6.37156	7.80045
ACH-000637	4.96809	0	7.02912	2.07039	3.37016	0.0976108	2.926	5.31578	5.61058	3.53854	2.40599	4.3512	4.47249	0.0143553	3.99095	0	4.45352	4.74578	5.22342	3.9542	6.66078	4.98914	6.02303	0.765535	0.31034	0.163499	2.18269	3.76341	6.52857	3.60644	0.0285692	6.7389	2.23266	3.08406	2.57773	0	2.76129	0.584963	2.85997	0.263034	4.04352	5.95187	0.545968	1.32193	6.61412	1.94111	5.63052	5.77768	7.38336
ACH-000455	5.34908	0	6.55013	2.11103	4.03386	0.214125	4.13832	6.49474	3.90014	4.30524	2.47508	3.68818	5.2604	2.33914	0.773996	0.464668	5.5292	5.749	5.85997	4.07211	4.57289	5.22728	7.35729	0.0143553	0.0143553	0.62293	2.59455	3.60407	5.95047	3.67694	0.0285692	7.854	2.75275	2.04963	0.516015	2.0321	3.58376	1.13093	4.06953	5.90521	4.19928	6.42004	0.536053	1.68706	6.61883	2.87184	5.57016	5.49153	6.96116
ACH-000389	3.81762	0	5.55367	2.25096	3.16672	0.0426443	5.40939	5.86592	6.54674	5.15097	2.21723	5.00809	5.50621	0.831877	1.52607	0.659925	5.08236	5.05398	5.41684	3.78869	5.70377	6.27984	8.6977	1.13093	0.687061	0.0565835	4.3147	6.22766	6.99175	4.38267	0.238787	6.85237	2.9241	3.14078	2.40599	3.22959	4.56621	0.505891	3.55336	5.91839	2.16993	5.92505	0.757023	4.71315	7.22497	3.44228	6.01167	6.50208	7.43121
ACH-000129	1.38405	0	6.01859	3.12433	4.92505	0.201634	0.443607	1.08406	6.96405	4.90448	3.75596	5.47249	5.75782	1.94486	6.87529	0.526069	4.80529	5.92813	5.88947	3.42089	5.97774	5.58886	6.38422	0.454176	0.189034	0.85599	0.454176	5.44294	5.37643	3.65535	1.87578	5.82375	5.06005	4.0365	4.49378	4.06867	4.23496	0.464668	1.27501	0.0565835	4.32481	6.75141	1.09761	0.516015	8.12107	4.17792	6.09571	4.99955	8.64663
ACH-000490	4.0027	0	6.28411	1.87971	3.37156	0	0.137504	4.98094	7.3505	3.86295	2.35332	4.30743	4.63227	1.11103	5.15745	0.250962	3.62176	3.93829	4.32841	3.06005	5.49185	5.3799	7.02004	1.23879	1.926	0.432959	0	3.26754	6.49633	3.97728	0.613532	6.36072	5.2724	1.97085	0.722466	2.53605	3.0321	2.29278	3.50589	0.321928	3.58376	6.33271	0.238787	0.0285692	7.21733	1.19535	5.71534	3.28688	7.54797
ACH-000434	4.45022	0	6.374	2.24184	4.0027	0.0143553	1.15704	5.59813	5.46597	4.25701	3.83693	3.99095	4.1235	0.0426443	3.11603	0.298658	4.28466	4.35403	4.69209	4.38405	6.55934	4.97957	6.66135	0.0285692	0.0426443	1.774	3.51854	4.53543	4.61294	3.87578	0.0976108	6.42559	1.0072	2.51854	1.58496	0.925999	3.21101	1.40054	6.65277	2.27202	4.30305	6.44427	0.887525	0.704872	6.57803	0.713696	5.44162	4.74953	7.98277
ACH-001086	4.54102	0	6.5818	1.65076	3.904	0.0143553	5.15664	6.18686	4.2891	3.58736	2.06005	3.15866	6.02126	0.0285692	5.39369	0.0565835	3.92695	4.89045	4.73552	3.27798	6.43095	5.32589	7.71404	0.0143553	1.26303	0.111031	2.02503	3.90207	6.51175	3.8846	1.07039	6.42677	5.45516	1.87184	1.34483	2.72901	2.73118	1.32193	4.36457	6.28947	3.83086	6.70196	0.807355	3.38543	7.19771	2.26903	6.14262	6.20906	8.17652
ACH-002042	3.51475	0	7.46426	2.29572	3.61824	0	0.575312	5.92434	4.65421	3.25852	2.62059	4.68032	4.88753	0.0565835	2.41414	0.0565835	3.23573	3.72792	3.42492	3.19849	5.69125	5.07852	5.54659	2.81967	0	0.454176	0.545968	3.62644	5.58736	3.74308	0	7.46581	2.50843	1.1177	0.910733	0.238787	2.89918	1.15056	3.12598	1.46989	3.46728	4.84699	0.176323	1.12433	5.97361	0.565597	5.60377	3.41549	6.56605
ACH-000597	4.18587	0.545968	7.12588	2.16993	3.76129	0	0.0703893	6.06846	3.28688	4.48349	1.44361	2.32769	5.58976	1.12433	3.06005	0.0703893	3.57894	3.90785	4.01257	3.94111	4.46532	5.76182	8.04625	1.68257	0	0	0	3.9279	6.79494	3.92505	0	5.76075	1.96717	2.50843	0.275007	2.28983	3.37712	0.0840643	4.01078	5.84298	4.1914	6.3014	0.555816	0.0285692	7.59753	2.91839	6.32427	6.18686	7.48776
ACH-000756	5.28244	0	6.5697	2.73985	4.5552	0.0285692	1.0072	5.9982	4.06781	5.0751	2.488	2.64616	5.5404	0.516015	0.0840643	0	4.67525	4.1811	4.54597	3.75702	6.42576	5.1807	9.37428	1.14405	0.111031	1.56071	3.88362	5.72629	6.79168	4.20633	0.176323	6.58586	0.15056	4.18349	1.02148	2.58736	3.85499	0.722466	3.60288	4.84699	3.65535	7.02824	1.41143	4.35332	7.38042	4.08236	6.12102	6.13299	7.6756
ACH-000396	4.71425	0	7.94474	1.98914	3.90785	0.0976108	0.941106	6.68524	4.34767	3.54844	3.852	4.87036	6.10392	1.93734	1.67807	0.0703893	4.25852	5.94158	4.18587	2.67582	7.20906	6.88166	8.61158	0.201634	0	0.604071	1.5509	4.45681	8.42127	4.22188	0.275007	6.61412	0.31034	2.18587	0.536053	3.08576	4.5472	1.99639	5.32048	5.98709	3.11437	6.49121	0.250962	0.604071	7.07296	1.5509	6.65464	4.43496	7.96613
ACH-000089	6.06867	2.20789	6.61648	2.91456	3.90207	0.0840643	0.0426443	6.02015	5.21917	4.57046	2.65076	3.88947	5.5345	3.47249	3.67694	4.12019	3.79077	7.38414	4.32697	2.5509	5.70736	7.46752	7.41929	1.23266	6.43146	0	0	4.47573	7.14343	3.39094	7.32598	6.00832	2.19849	0.0976108	5.9279	5.03826	3.37295	3.09592	5.60407	1.37851	3.39369	5.79416	0.189034	1.02148	7.85206	2.3505	6.00203	0.992768	8.0284
ACH-000371	0.0703893	0	6.39455	2.36457	4.15299	5.31179	0.0840643	1.76129	3.94767	4.55336	2.20477	3.76022	6.17792	2.33342	0.0143553	0.0285692	4.13422	5.5373	5.13011	4.29352	5.24527	7.05192	5.69125	0	0.0703893	0.137504	0	4.42828	6.58451	4.37156	0.0426443	7.50048	0.0426443	0.0143553	0.887525	2.30159	2.11437	1.7137	5.04789	0.0840643	4.26303	5.60051	0.422233	0.0143553	7.37747	1.67807	5.56041	2.49825	8.6575
ACH-000265	4.23726	0	6.03012	2.57289	3.70266	0.0143553	0.378512	4.35262	4.393	4.77189	2.26903	3.45286	6.29278	2.07724	4.01703	0.124328	4.58195	5.50589	5.47832	4.904	5.5472	5.56925	6.13668	0.15056	0.0285692	0.201634	0.0285692	3.90593	6.57077	4.0027	0.0426443	8.07719	1.60407	2.06695	1.13093	4.0321	4.52982	0.0976108	5.41346	8.56898	4.06523	5.90761	0.378512	0.400538	7.73234	1.36737	6.20731	3.97728	7.39712
ACH-000132	6.51207	0	6.38405	2.63691	4.44824	0.0143553	3.39232	5.35826	3.38267	3.94111	2.40599	3.89433	5.08958	3.5741	4.26978	0.226509	3.41414	5.36982	4.05485	4.13832	6.04264	5.67356	7.07959	0.903038	1.09085	0.0143553	0.722466	3.04439	6.88191	4.14649	0.695994	6.99424	3.73227	1.64155	4.35262	2.27202	3.57773	2.72028	4.96763	0.704872	4.11686	6.07895	0.790772	0.678072	6.82158	1.61353	5.00405	3.26153	7.61294
ACH-000216	5.24982	0	6.22728	1.94111	4.26978	0.137504	0.970854	6.74483	4.74416	3.73769	2.29278	4.13668	4.94907	2.9782	1.61353	0.584963	4.06609	5.98618	4.38128	3.23266	5.28577	4.63749	7.90749	2.02857	0.0976108	0.333424	1.03562	4.20006	7.65678	3.88947	1.07724	7.06253	0.286881	0.594549	4.67638	4.7703	4.15462	2.4957	6.24888	5.27761	3.77189	6.54828	0.632268	1.70929	7.0468	2.62059	6.10622	4.14486	7.26472
ACH-000613	4.0505	0	6.72465	1.80323	3.9241	0.0285692	1.13093	5.55059	4.23266	4.14568	2.38405	3.36597	5.54905	3.03562	2.45154	0	3.84499	6.02037	4.9397	4.23189	4.67412	4.67073	8.25068	0	0	0.0143553	2.83592	4.83289	7.51554	4.64212	0.298658	6.47703	2.488	0.536053	1.76553	2.54102	4.55766	0.0703893	4.13914	4.5601	4.36737	6.68594	0.641546	3.65764	6.55949	2.96532	6.49777	5.81044	7.5479
ACH-000855	4.72083	0	7.53807	2.33914	3.77083	0.0285692	0.963474	5.51349	4.70708	3.22497	1.8679	3.92029	5.13093	0.0143553	2.62994	0.0143553	5.32517	7.94656	5.63865	3.9241	6.42038	5.06867	6.26697	0.782409	0.0426443	0.0703893	0.526069	4.37226	6.58676	4.47962	0	7.72342	3.91552	1.26903	0.176323	3.28688	3.38543	2.05658	4.05398	0.163499	3.99095	5.91528	0.263034	0.0285692	7.83422	0.910733	6.34926	3.81558	7.94152
ACH-000906	4.04089	0	6.27333	2.37295	3.7126	0.0285692	2.44095	6.29774	3.70929	4.42559	2.96532	3.75489	6.62337	1.87971	1.73118	0.0143553	3.04789	4.36737	3.83996	3.11103	6.14954	5.02148	7.51602	0.575312	0.0426443	0.15056	0.124328	5.86047	6.53916	3.46858	0.0976108	6.65148	0.356144	0.0285692	3.78555	3.14078	3.22805	0.526069	4.27873	8.0376	3.32193	5.15543	0.286881	2.26604	6.6953	3.17951	5.71232	5.76182	7.86487
ACH-000348	3.59096	0	7.14435	2.24489	3.20789	0.214125	2.46205	6.49458	3.67469	3.96901	2.89142	3.85699	5.9697	0.815575	1.56071	0.0703893	4.75969	4.52293	4.95233	3.66903	6.48494	6.27947	8.78731	0.378512	0.111031	0.0426443	2.81147	6.8596	6.60274	3.96347	0.0285692	7.11343	0.0426443	2.89336	0.555816	3.32193	4.37156	2.93923	5.54597	4.87036	4.38405	7.01781	0.454176	0.604071	7.22738	3.55827	6.25456	6.46826	8.03122
ACH-001100	0	0	3.60763	1.43296	2.31904	4.84348	3.64962	0	2.37851	2.01792	1.29866	2.72247	4.18507	1.25701	0.286881	0	2.21723	2.82579	4.14975	2.48027	5.3345	3.90785	7.00697	0	0.0426443	0	0	7.13319	4.53605	2.95977	0.0285692	5.41886	0.0976108	0	3.27053	0	1.73552	2.19849	5.52482	0	3.91456	5.67751	0.176323	0	6.03694	1.59455	5.2724	4.75168	4.76129
ACH-000238	4.41143	0	6.16229	2.40871	4.00809	0.83996	4.32481	6.17792	5.51317	4.06091	2.96901	4.45483	4.42895	0.0285692	4.11187	0.0565835	5.55612	7.13463	6.07831	3.61706	6.2555	4.90785	8.20916	3.82985	0.163499	1.02148	1.98914	5.80374	6.71987	3.28096	0	6.91385	2.10769	2.63459	0.575312	2.01078	3.16993	1.50589	4.31832	3.80735	3.20633	6.09233	0.782409	3.16189	6.85462	0.704872	4.10852	4.21023	7.0706
ACH-000237	5.22882	0	6.23745	1.69153	3.03914	0.584963	6.17153	7.39506	5.56102	3.58135	3.18745	3.9542	4.79181	1.20789	4.45746	0.790772	4.78084	5.34305	4.1643	3.57168	5.88118	5.44062	7.25833	0.238787	0.0426443	0.0285692	2.16672	4.32697	7.6233	4.19061	0	7.21733	3.5435	2.96717	0.545968	2.31615	3.58135	1.51602	4.69988	7.81813	3.90207	6.92208	0.799087	2.67807	6.56346	2.16027	6.32373	7.06674	7.87221
ACH-000393	4.20555	0	7.07788	2.30743	4.08406	0.0143553	0.176323	6.6953	4.20006	4.26903	3.10601	4.08491	5.8268	0.516015	0.201634	0.0143553	4.3067	5.06781	4.20006	2.9279	6.67172	6.22091	7.60481	0	0.0285692	0.15056	1.05658	4.44692	7.97596	4.20867	0.0285692	6.93923	0.704872	0.0426443	1.90689	3.98185	4.50906	2.38681	6.87652	6.393	4.09001	5.43929	0.895303	0.887525	6.6946	0.389567	6.32912	2.7866	8.22574
ACH-000623	4.66903	0	5.92908	2.32769	3.32193	0.887525	1.79077	6.63793	3.66789	4.28983	0.757023	4.61706	5.47411	3.46336	2.58015	0.62293	5.1815	5.65105	4.96209	3.57046	6.59753	6.53512	10.378	0.432959	0.111031	0.31034	1	4.23343	7.15866	4.31976	0.226509	6.50732	4.18666	0.925999	0.992768	5.53978	4.03122	0.422233	4.8485	3.40599	3.35614	6.76434	0.475085	0.0976108	7.91839	3.851	6.64053	8.36654	7.05431
ACH-000359	3.42358	0.0285692	6.7021	2.14078	4.0268	0	2.83794	5.79025	3.00899	3.9782	2.68706	4.89385	5.57137	1.1635	4.28318	0.887525	3.38543	3.67469	3.98185	3.1177	6.28355	5.49761	9.65288	0.275007	0.0426443	0.0840643	2.42492	4.29057	7.71733	3.82375	0.0703893	6.43313	3.29278	4.96855	0.176323	6.48349	3.40327	1.41143	4.54226	3.58616	3.9644	5.81147	0.887525	1.0635	6.35861	4.23189	6.76275	5.51349	7.83807
ACH-001028	4.43962	0.0285692	6.04111	1.0072	2.04963	0	0.0285692	3.0197	2.03914	2.22651	3.13914	3.0072	3.70377	1.926	0.604071	0	2.37851	3.94111	3.10936	3.33914	4.51979	4.44029	5.21801	0	0	0	0	2.64155	3.7148	2.72247	0.0426443	5.36807	1.40599	0.298658	1.76553	4.32697	2.45681	0.83996	4.98504	6.45204	3.52482	4.51979	1.03562	1.45943	7.59343	0.790772	5.23151	0.956057	6.9222
ACH-000621	3.19535	0	7.95443	2.16993	4.11936	0.111031	1.41684	5.4019	3.98003	4.92647	2.41143	2.41414	6.45401	1.36737	2.71589	0.176323	5.14445	5.6893	5.35262	2.57773	6.17852	5.65964	9.0124	0	0.0285692	0.0426443	1.09761	4.78764	6.56484	3.74416	0.0426443	5.35966	0.124328	1.12433	0.201634	2.13422	3.51602	1.10434	4.82477	5.18587	4.07468	6.83099	0.604071	0.992768	8.2879	3.13914	6.14812	6.92671	8.0359
ACH-001641	4.99729	0	6.42324	1.926	3.76447	0.0143553	4.82222	5.57803	6.89591	3.40599	2.88557	3.98459	5.75542	0	3.83289	0.0143553	3.42492	4.488	4.43229	3.41007	5.96602	5.07852	5.8885	1.33342	0.0143553	0.411426	0.807355	3.51475	6.97797	3.45418	0	6.29701	4.60999	2.24793	0	1.27501	1.9486	1.76129	3.64616	0.189034	4.05658	4.37712	0.214125	0.0840643	7.52395	0.31034	6.72479	4.58316	7.47752
ACH-000056	0.0976108	0	5.19574	2.08746	3.48671	3.21878	0.0840643	0.978196	3.59813	4.66619	2.38681	3.50716	5.03782	2.49825	0.594549	0	3.88557	6.1637	4.58796	3.79494	4.86888	6.55628	5.74792	0.31034	0.0426443	0.0565835	0.0285692	5.33271	5.82248	3.44228	0.0426443	6.67864	0.799087	0.0840643	1.35614	3.63691	1.36737	0.137504	3.42761	0.263034	3.4019	7.15704	0.545968	0.0840643	7.37287	2.74631	5.93428	2.12102	7.54226
ACH-000483	6.25323	0	6.85325	1.5509	3.30012	0	5.36212	6.20496	4.50653	4.60822	2.02148	3.13258	5.75141	3.01792	6.29884	1.38957	4.42962	5.2211	4.75916	2.7761	6.21975	5.89458	7.5529	0	0.0703893	0.85599	2.31904	3.98641	7.4465	3.63459	0.555816	5.57107	3.98003	2.92979	2.43829	3.0036	4.70598	1.69599	4.70432	2.47768	3.94953	6.15704	0.594549	0.9855	7.47379	3.66334	6.05246	6.75502	7.37565
ACH-000514	4.88655	0	5.73904	3.0054	4.62644	0.641546	2.11437	4.30305	4.99005	5.03122	3.55459	4.95233	6.6359	3.27053	0.485427	0.790772	5.09085	6.57803	5.93546	5.14771	6.76129	5.53761	0.464668	0.650765	0.250962	0.367371	0	4.48414	4.59335	3.9982	5.56102	5.91934	4.13422	0.956057	6.2937	5.73688	3.60763	0.0703893	3.49953	0.15056	3.81967	7.26697	5.27687	1.43829	8.48438	5.12722	6.20906	6.6532	8.36619
ACH-000051	4.8334	0.0703893	6.76739	2.40327	3.6017	0	2.82171	4.39985	3.6241	4.49761	2.61353	3.24184	5.35755	2.95047	4.22882	0.250962	4.90207	5.77689	5.01569	3.98732	5.75302	5.89506	7.53232	0.176323	0.0565835	0.678072	0	4.45418	7.39215	3.99095	0	7.29269	0.555816	2.04963	0.807355	4.66221	4.83643	0.189034	4.92552	10.1667	4.30012	6.63517	0.748461	0.0426443	8.15163	4.08916	6.41447	5.56742	7.20682
ACH-000043	4.15462	0	6.54504	1.97085	2.74201	0.0703893	5.67271	6.05202	5.2114	3.39094	3.17632	6.18606	4.35262	0.565597	3.97269	0.669027	4.40599	4.78241	4.51159	2.67356	6.52842	6.01324	8.70117	0.0703893	0.0143553	2.79286	1.07039	3.41819	7.05713	4.17792	2.13422	6.18626	3.48929	0.163499	0.111031	3.11437	4.12267	1.50589	5.28947	6.50319	3.64847	6.15805	0.823749	0.485427	7.26031	1.34483	6.14017	4.1819	7.40761
ACH-000936	5.18982	0.0285692	6.53496	2.26903	3.33914	0	0.0840643	5.33914	4.43563	4.24413	3.0321	3.47379	5.21917	2.854	2.76553	0.0143553	4.80271	3.97361	4.54782	3.17951	5.74846	5.42055	7.64241	0.722466	0.389567	0.0426443	1.28688	4.03034	7.07532	4.09508	0.15056	6.49249	1.61353	4.19849	1.49057	4.73931	4.02414	1.79909	4.05398	5.75302	4.06867	6.19967	0.815575	0.0840643	7.36816	0.823749	5.6985	4.62877	7.5373
ACH-000716	4.38819	0	6.69627	1.51096	4.13996	0.0143553	2.02148	6.65263	6.00697	5.08916	3.02326	4.2817	5.92101	1.74846	6.42593	0.356144	4.95187	4.92552	4.62527	4.61471	6.47427	6.00158	7.94439	0.464668	0.15056	0.0143553	1.65992	5.11894	6.91719	4.29425	0.286881	7.33047	0.137504	2.21101	2.65764	3.87971	4.35966	2.31904	6.28688	2.93357	3.55459	6.13278	0.584963	1.36737	6.94591	2.22959	7.06016	5.6761	8.19948
ACH-000988	4.91743	0.0703893	5.17353	1.848	3.30889	0.0426443	0.124328	6.55597	4.26379	4.74308	2.73118	3.6837	5.40293	4.01078	3.6427	0.0143553	4.22033	6.11082	4.54164	2.9241	6.39249	5.43363	6.68215	0.485427	0.0840643	0.0565835	2.4489	3.75809	6.98242	4.14649	0.0285692	6.80864	4.33914	2.21412	2.58256	5.03562	4.36107	0.201634	4.29131	0.400538	3.56438	6.24413	0.432959	0.895303	7.54589	0.464668	6.30195	6.18864	7.6532
ACH-000952	1.19535	0	5.93899	2.83794	2.92029	0.0143553	0.0285692	5.98231	5.78555	4.65707	3.07382	5.96648	5.01569	4.0798	5.0387	0.0285692	3.58616	6.47249	4.78555	3.34341	6.59335	6.44675	7.91373	0.389567	0	0.0426443	0.0143553	3.96809	5.02813	3.93829	0	6.02326	2.72028	0.15056	4.69153	5.91743	3.78869	2.32193	4.29352	0.0840643	3.65421	7.00203	0.516015	2.0036	7.89075	4.27053	7.16098	0.495695	7.88612
ACH-000065	0.263034	0	5.44162	2.94111	4.08746	2.58976	1.61353	4.69265	4.64904	4.54967	1.98185	2.5509	5.71562	2.11437	0.464668	0.0143553	3.5472	3.43563	4.45286	3.36877	4.29057	6.25399	7.01268	1.83188	0.333424	0	0.0426443	5.6985	5.79572	4.43763	0.0976108	7.51846	2.80941	0.0143553	5.97613	0.773996	6.9292	2.08066	4.79494	1.51602	3.46205	7.12732	2.72683	3.99729	6.64097	0.516015	5.62176	7.42819	7.86146
ACH-000609	0.389567	0	6.48993	1.85997	3.48671	0.0565835	0.963474	6.92422	4.09761	3.86493	2.57531	4.62176	5.28096	0.0285692	2.45154	0.15056	4.8535	5.61794	4.54102	2.64616	6.37764	5.89724	9.18321	0.0976108	0.0143553	0	1.73985	5.33056	7.71658	4.47897	0	6.55919	1.83592	2.66221	0.0565835	4.66164	4.45286	0.879706	4.26003	5.0492	3.51602	6.35403	0.443607	1.47508	8.1267	3.72792	6.52278	6.97051	7.80826
ACH-001411	5.43263	0	6.57999	2.1177	4.05918	0.0426443	4.75114	4.62117	6.57577	3.8268	2.65535	4.36107	4.83592	0	4.86394	0	4.42223	5.83845	5.07425	3.42089	5.01033	4.48349	5.02724	0.189034	0.925999	0.0565835	0	2.86196	6.78385	3.97453	0	6.80761	3.27352	1.47508	0	0.782409	2.19535	2.42492	3.34625	6.38249	2.60644	4.90352	0.0976108	0	7.3097	0.124328	5.41312	2.54597	7.1644
ACH-000504	4.31107	0.0976108	6.55321	2.44626	4.15623	0.575312	4.73552	6.62877	4.39094	3.9222	2.53854	5.00675	5.74416	2.91648	5.34625	0.739848	4.96486	6.53294	4.94017	2.87971	6.13976	7.03716	9.22234	1.5509	0.0840643	0.31034	2.74631	5.56163	6.83441	4.39575	0.298658	7.19357	3.52482	3.81967	1.35614	4.86839	4.32697	0.238787	4.51096	3.9982	3.55213	6.76075	0.464668	0.0703893	7.79533	3.52105	5.87652	7.51341	7.75542
ACH-000956	2.64386	0	6.21956	3.41819	4.65992	0.0143553	0.111031	5.84624	7.05788	5.28836	2.61353	5.35156	5.39917	3.73769	1.23266	0.0565835	5.53138	7.63358	5.40259	4.65134	5.84549	5.55367	4.37712	0.15056	0.650765	0.275007	0.124328	4.32265	6.3918	4.03826	0.176323	6.61765	2.07382	0.189034	5.0018	4.23496	3.35614	0.201634	3.92979	5.18031	3.6565	6.51523	1.46467	3.71699	8.0614	5.18309	6.51728	4.0268	7.58143
ACH-001712	4.72955	0	6.54813	2.46728	2.13093	0	7.49633	6.60363	4.17153	3.24031	2.49057	4.12846	4.13422	0.526069	3.73444	1.02857	4.21723	5.9542	4.79494	3.0036	5.21062	6.4489	9.19719	0	0	0.695994	1.46467	3.32193	7.07146	3.60881	5.56682	6.33914	1.83592	0.704872	0	2.79286	3.5008	2.39232	4.69933	7.39077	3.66789	5.77689	0.555816	0.0703893	7.80697	1.81147	5.80581	6.16732	7.10014
ACH-000652	4.46663	0	6.97281	2.10769	3.70266	0.0703893	0.238787	5.98664	5.70127	4.48285	2.22342	2.94298	5.24603	2.88753	1.66448	6.95128	4.51602	5.32229	3.9782	3.35473	5.8125	6.19633	6.67582	5.37051	1.81967	1.07039	0.678072	4.07895	6.96936	4.47962	4.70487	6.88789	1.45943	2.66448	3.24031	2.91073	4.21335	1.9486	5.62907	6.46826	4.82528	5.94509	1.01436	3.97911	7.08736	2.73769	6.6565	4.9472	8.19717
ACH-000414	4.40667	0	6.29112	2.32769	3.93357	3.30012	6.40003	5.67723	5.74039	4.14568	2.93357	2.97085	5.45943	1.97453	0.895303	0.0703893	3.80735	6.09908	4.29866	4.3512	6.11103	5.39678	4.96347	0.565597	0.0976108	0.15056	4.61294	2.72247	6.29462	3.55827	2.07724	6.94533	0.238787	4.49506	2.64386	3.74201	3.48414	1.41143	6.3087	4.17393	4.01881	6.09276	0.970854	4.52982	6.89978	1.25096	6.43846	4.83238	8.08513
ACH-000472	3.91839	0.0143553	6.66647	1.28096	2.17313	0.0426443	4.22882	4.61235	4.96486	3.848	2.0036	3.25701	5.02591	0.111031	4.91409	0	3.66789	4.63459	4.36457	3.02148	6.00607	4.1416	6.24146	2.53854	0.0703893	0.15056	0.389567	4.38612	5.24793	3.46989	0.214125	6.87283	3.49185	1.18269	0.526069	1.39506	2.82171	1.47508	3.25701	0.226509	2.81558	5.28318	0.400538	0.0976108	6.39403	0.189034	4.85947	3.77926	6.63081
ACH-000007	4.03122	0	5.85624	3.07211	3.71699	0.0285692	0.0143553	5.54257	4.96486	3.95791	2.81762	3.85699	4.63981	2.9982	1.40599	5.46891	3.69488	6.10957	4.87873	3.5656	4.46989	5.52857	7.37513	1.91073	6.16551	0.0840643	0	5.93546	7.26125	3.37016	2.87774	6.14995	0.0143553	0.124328	6.32409	3.70819	2.69153	1.68257	3.53978	0.0565835	3.16672	6.24755	0.378512	0.0143553	7.71032	2.08066	5.70293	1.31034	7.71624
ACH-000446	3.97545	0.201634	6.49665	3.20163	4.50526	0.0143553	5.71973	5.3147	3.87873	4.64904	1.60881	2.50589	4.8846	2.57289	2.1375	0.124328	4.51665	5.2854	5.0321	3.31325	5.58075	5.63372	8.34868	0.970854	0.0703893	0.62293	0.594549	4.71754	6.39985	3.89821	5.65335	7.01547	4.20711	1.17632	3.84499	3.32769	4.09677	0.970854	4	4.48285	3.80735	6.28928	0.773996	3.17951	7.22333	3.25399	6.1641	6.4261	7.44054
ACH-000386	0.678072	0	5.79494	2.82579	4.09339	2.21723	1.89142	2.82375	5.43363	5.29352	2.01792	3.82579	6.00764	2.76765	2.0072	1.29866	4.12102	5.03166	5.59036	4.7021	5.71699	6.47346	7.1235	0.344828	0.0703893	0.0426443	0	4.67525	6.5815	3.8679	0.15056	7.43688	0.298658	0.411426	3.9982	2.09761	4.25172	4.30086	6.39592	5.18309	4.21645	7.52199	0.731183	0.0285692	6.2817	1.83188	6.34554	5.31361	8.23189
ACH-001850	4.84499	0	8.06899	1.28096	2.75702	0	1.65535	6.26847	4.9241	4.15462	3.51728	5.23419	6.15259	0	4.75168	0	3.93168	6.45812	4.6017	3.05137	4.91313	5.44261	6.48704	0.757023	0	0.367371	2	5.97361	7.95152	3.34199	0	7.01246	0.0285692	3.82273	0.575312	4.02503	3.76235	1.62293	4.18269	5.21023	3.30451	5.11562	0.111031	0	7.28086	1.12433	5.55275	4.81609	8.0072
ACH-000755	4.24869	0	6.45812	2.58256	3.62994	0.0143553	0.0426443	4.39232	4.0197	3.51349	1.23266	2.42761	5.08279	2.11437	4.61824	0.250962	2.62293	5.09339	2.6893	2.71589	5.77637	4.81865	5.7211	0.0285692	0.0976108	0.0143553	0	3.03034	5.22574	2.54102	0.0285692	5.7845	2.51349	0.0840643	5.76871	4.23879	2.82171	0.0285692	2.67356	2.38681	2.05658	5.45121	0.238787	5.07895	7.26162	1.85599	6.91361	6.35085	7.67596
ACH-000028	2.63691	0	6.7896	2.81967	3.7301	0.0285692	0.0703893	5.61294	4.54411	4.14323	1.73118	2.90304	5.31759	1.3505	3.81352	0	4.61706	5.6585	4.78921	3.02503	5.94696	5.58466	6.36615	0.263034	0.0426443	0.0143553	0.124328	4.34696	6.08661	4.56499	0	6.03848	2.07724	0.565597	5.67073	7.42156	3.49057	0.214125	4.26303	5.16631	3.68482	5.83567	1.09761	6.29682	8.08895	2.24489	6.13217	6.13525	7.29627
ACH-000665	4.82833	0.0285692	5.95093	2.41954	3.63575	0.0840643	5.74389	6.59559	7.64976	4.28096	3.48156	4.3875	5.46891	3.10769	1.57531	0.0840643	4.34199	4.88996	4.2891	3.08576	5.88215	6.78816	8.75472	3.65878	0.111031	0.823749	3.55582	5.11562	7.50279	3.82477	0.0703893	6.38007	0.189034	2.48285	5.86913	1.96347	4.5435	2.68482	5.65076	7.95041	3.41684	6.1469	0.790772	2.91073	7.05517	1.09085	5.52042	5.72356	7.58789
ACH-000078	2.96901	0	4.98732	2.31904	2.74416	0	0.0976108	3.65306	4.46467	4.79442	0.0143553	0.0426443	5.10224	0.0143553	3.64039	0.0143553	4.76129	5.62527	5.03298	4.18982	5.0387	4.774	7.23821	0	0.0143553	0.137504	0	4.69766	5.18626	3.3978	4.21801	6.37086	4.93876	0.0426443	8.29687	5.1177	4.00899	0.0285692	3.29278	0.669027	4.16591	7.66249	3.62059	4.05311	7.40506	4.27202	3.98914	5.19574	6.43613
ACH-002046	5.14445	0	7.93363	1.83188	4.20163	0.333424	2.37573	7.15168	4.0197	3.86394	2.46728	3.56682	5.82502	2.74201	3.16511	0	4.96209	5.87455	5.07211	2.65076	5.24679	6.98561	8.56297	0	0.0426443	0.0285692	2.31034	4.92837	7.70998	4.63343	0.0143553	6.85012	0.495695	1.0635	0.344828	3.64039	3.63459	2.04963	4.82324	6.46303	3.42223	5.41177	0.704872	0.0703893	7.85711	1.73985	6.53792	5.478	7.64997
ACH-000397	5.14608	0	7.14792	2.09424	3.82477	0	0.0703893	6.31034	3.72028	4.37295	1.91073	2.96717	5.55919	2.37016	0.201634	5.08746	4.49761	6.12474	5.18309	3.11936	5.25058	5.03738	3.53232	1.03562	0.0285692	0.0426443	0.0143553	3.7939	8.96726	4.19692	0	7.14832	4.20163	0.0703893	3.78241	2.76341	3.42492	2.91456	5.37782	6.82655	3.70487	5.37643	0.454176	2.87184	7.2866	0.773996	5.46238	5.24565	7.678
ACH-000229	3.85798	0	6.0365	2.38957	1.25701	0.111031	7.44609	6.25965	4.50398	3.23419	2.88947	5.2521	4.16672	1.74846	4.26679	0.0143553	4.65306	4.79077	4.54905	2.98914	6.14343	6.11166	10.125	0.124328	0	0.0285692	0.0703893	4.0993	8.08958	4.0365	0.0840643	5.70791	1.81147	2.12102	0.454176	0.722466	3.94953	1.01436	5.09508	5.43863	3.50208	6.15157	0.641546	0.0565835	7.49498	2.07382	5.82807	7.90587	7.05658
ACH-000518	4.50144	0	6.62278	2.25701	3.0054	0.356144	6.00899	5.22458	5.97384	4.53792	2.81967	5.6985	4.61706	0.0143553	5.63865	1.54102	3.98094	4.87823	4.81916	3.37156	5.97888	5.65907	7.39258	2.32481	0.0703893	0.0426443	0.226509	4.28983	6.72329	3.66448	0.0976108	5.98436	4.69988	2.14405	0.443607	2.15056	3.43029	3.19849	6.16872	8.3486	3.5509	5.34056	0.31034	0.0703893	7.73877	0.910733	5.60021	4.14405	7.73471
ACH-001566	4.76288	0	5.57682	1.59932	2.852	0.0976108	0.226509	4.6017	3.22959	3.2555	2.35332	3.27053	4.72192	1.17632	1.75702	0.0426443	3.7148	5.67129	4.51665	1.72683	4.32769	3.98003	8.35116	0.0426443	0	0.0840643	3.06178	7.80948	5.10811	3.4019	0.163499	6.76673	0.321928	0.400538	0.176323	5.52105	2.74846	1.03562	2.86592	1.20789	3.74416	4.30159	0.545968	3.99005	7.02148	0.773996	5.83845	6.36194	7.75168
ACH-000252	5.60615	0.0840643	6.67934	2.93168	3.01436	0.0840643	0.0565835	6.13299	5.30451	4.55827	2.88362	4.07468	5.53263	1.33342	3.43162	0.9855	4.01881	5.31542	4.58135	4.51854	4.75007	5.92908	8.65489	2.9486	4.79805	0.176323	0.201634	3.5741	7.43613	3.86592	3.32337	7.58676	0.0565835	0.970854	4.15785	2.73552	2.79077	1.89918	5.39266	1.33342	3.91456	6.43296	0.356144	0.0143553	7.26407	2.51854	5.74039	1.63227	7.82661
ACH-000572	4.36737	0	6.83706	2.80116	5.27575	0	0.201634	5.76924	4.33342	4.916	2.91073	3.74739	5.972	0.356144	0.731183	1.04264	5.20163	7.0063	5.80478	3.15704	4.78712	5.99073	7.58782	0.0976108	0	0.0565835	2.09085	7.7086	5.96394	4.65134	0.0703893	7.71555	2.56071	1.848	0.731183	4.92458	4.24489	2.04614	3.91073	2.27798	4.45022	6.11291	0.565597	5.2211	7.47102	4.39917	6.8596	5.45352	8.03039
ACH-001605	5.38647	0	7.25842	2.45943	3.62761	0	2.42492	7.15421	2.6893	3.96901	2.15381	3.51096	5.90256	2.81762	2.76341	0.443607	4.85997	6.45992	4.96901	1.99277	5.79831	6.02436	9.45607	0.214125	0	0.201634	0.978196	3.64616	7.0735	4.02148	0	7.01581	3.30597	0.0840643	1.25701	3.78555	3.72247	0.62293	3.20633	2.15056	3.56071	5.57984	0.604071	0	8.24869	2.74416	6.44195	2.72465	7.96578
ACH-000277	1.4957	0	8.39678	3.35332	4.18587	0.0143553	0.0703893	4.82629	4.20398	4.25852	2.64386	5.78555	5.40871	1.73118	4.36317	0.536053	4.40395	4.78555	4.22265	2.7761	7.5932	6.97591	6.30451	0.0143553	0.0285692	0.0426443	0.0143553	4.01525	7.27854	6.54009	0.189034	6.45927	3.26303	0.0703893	5.56773	4.27798	3.75489	0.124328	3.83086	0.454176	3.28688	5.80064	0.516015	1.66448	7.17871	0.847997	5.51349	5.99684	7.3608
ACH-001239	4.52419	0	6.15886	2.56803	3.73552	0.163499	0.879706	6.15745	4.57833	3.65992	3.30159	5.36317	5.17672	0.15056	0.286881	1.45418	5.59186	6.16972	6.07296	3.41954	5.39815	5.76022	8.31288	1.51602	0.176323	0.0285692	0.137504	6.76567	5.79649	4.1035	0.163499	6.53419	0.201634	0.344828	4.72629	4.48671	4.08151	2.14405	4.95699	1.34483	4.06437	6.69864	0.895303	1.0635	7.71541	3.63807	6.2948	5.1635	7.824
ACH-000786	0.0840643	0	5.21684	2.93168	4.31252	6.42408	0.0976108	0.238787	5.19495	4.68706	1.68706	3.86493	5.38509	3.17313	0.454176	0.0840643	3.95327	5.41853	4.59515	4.05137	4.32048	7.09898	4.97591	0.0426443	0.201634	0.475085	0	3.96809	5.92434	3.65191	0.344828	6.68047	0.0285692	0	0.475085	0.238787	2.37295	0.83996	4.51412	0.0976108	4.34127	7.2791	0.464668	0.0565835	7.10821	1.14405	6.13463	2.73118	7.99447
ACH-000803	1.46989	0	5.92719	2.54102	4.06264	0.443607	0.137504	5.33056	4.68089	3.70708	4.20085	5.57864	5.75622	3.95884	3.8125	0	4.40054	6.81532	5.0268	4.88704	5.07468	5.90929	7.1633	2.43829	5.73363	1.24489	0	5.88313	5.04658	3.33914	8.74685	6.70694	2.20789	0.0976108	7.3394	3.87873	3.61117	0.0703893	4.52419	4.87725	3.6017	7.04144	4.29205	3.0072	7.51136	3.76235	5.30561	6.65048	8.2292
ACH-001970	5.09719	0	6.85	2.55336	3.51096	0.0285692	0	6.37764	4.92552	5.00809	3.37295	5.12391	5.24717	2.02148	0.422233	0.333424	4.34767	5.97085	5.72137	2.91839	2.76977	7.17503	6.29002	0.555816	0.0703893	0.0143553	0	6.46058	5.83618	4.17313	0.704872	8.16862	1.91456	0.389567	3.90014	3.12928	3.7301	1.62293	3.4019	2.37573	4.66959	5.13504	0.659925	4.09845	6.6222	2.37016	6.76115	5.66874	8.02951
ACH-002038	6.71191	0.0285692	6.94533	2.48285	3.96162	0	2.58015	6.27333	6.09761	4.3067	2.24793	2.90111	5.66078	4.34199	5.07296	5.51412	5.10559	7.17193	5.48704	2.18903	4.81455	5.7447	7.9913	1.04963	5.92576	0.356144	0	3.65992	6.58616	4.61941	5.68426	6.62249	0.0565835	0.422233	5.00675	1.54597	3.76977	0.782409	5.31143	2.91265	3.15543	5.06005	1.08406	0	8.66416	1.66903	6.51665	4.21878	7.02015
ACH-000537	5.8125	0.0565835	5.53792	2.65076	3.26303	0.0703893	5.0148	5.65793	4.04089	3.7761	2.49313	3.45549	5.91504	1.45418	0.15056	2.848	3.92125	5.83036	3.52982	3.15218	5.00495	5.8301	8.18567	0.201634	0.0840643	0.0143553	0.286881	4.98322	7.2341	2.79909	6.49809	6.68384	0.659925	0.831877	0.678072	3.08746	3.89433	1.72683	5.01033	7.53271	4.05658	6.57607	0.389567	1.774	7.15299	2.04614	6.37051	6.91958	6.68664
ACH-000419	2.17951	0	6.0354	2.62059	3.76447	1.89918	0.333424	5.16912	4.91169	5.0648	1.4957	4.17393	6.08343	3.96993	0.0703893	0.238787	3.98368	6.28114	5.18982	2.40054	5.46172	6.71973	1.7137	0.111031	0.0565835	0.15056	1.04963	3.44758	4.45483	3.88264	0.124328	5.39197	0.0976108	0.0840643	3.24184	0.226509	4.51475	3.91456	5.37782	0.201634	3.6311	5.32589	0.31034	0.0285692	7.14934	1.46467	6.28411	0.505891	7.69453
ACH-000724	3.37851	0	6.50779	2.43829	4.39985	0.799087	0.201634	5.36177	4.30961	3.90207	3.04963	4.62469	6.09571	2.04614	6.49649	0.0703893	4.18349	4.61883	4.74416	3.28983	5.97223	5.63807	8.46414	0.731183	0.111031	2.06005	0.0143553	4.24793	7.05864	3.72356	0.137504	6.35738	0.321928	1.56071	2.04614	2.4957	3.36877	0.62293	5.18388	2.90111	3.44626	6.48333	0.321928	0.526069	8.31252	2.23879	5.92029	6.05723	7.97951
ACH-000522	3.92695	0	7.01044	1.89142	3.62994	0.0143553	2.25701	6.52998	3.85499	4.2211	2.62527	3.07553	6.38301	0.536053	2.91265	0.0426443	5.06307	6.23936	5.48832	4.36317	6.09993	5.25776	6.70874	0.0143553	0.0426443	0.0426443	2.46205	3.40871	5.50938	3.44095	0.0703893	7.35447	1.45418	0.0285692	1.62761	2.96717	3.97728	0.411426	5.14282	7.85574	4.04876	5.94883	0.687061	3.03386	7.32057	0.659925	6.20867	4.03034	8.01848
ACH-001549	0.773996	0.0285692	5.90833	1.83188	4.06091	0	0	4.37295	4.15056	5.08619	4.15947	5.02591	4.68313	0	2.79909	0	3.86888	6.34394	4.46663	2.81762	6.79312	5.39335	6.3672	1.63227	0	2.25096	0	4.52795	5.75515	5.23573	3.43829	5.56925	1.95977	3.6893	3.99548	6.31651	4.70432	0.0285692	3.45154	0	2.44095	4.32265	3.46989	0.678072	9.02636	4.41075	6.48478	5.38198	8.97871
ACH-000706	5.03122	0	6.28411	1.84398	3.76447	0	2.32769	6.39575	4.43429	3.1635	2.1375	2.75275	5.06523	2.23573	4.67582	0.378512	4.8679	6.53916	5.1534	3.27202	6.283	2.05658	8.42652	0.0565835	0.0143553	0.0703893	0.748461	4.1811	6.92196	3.63343	0.15056	6.24432	0.411426	3.8679	4.8268	5.39815	3.61824	0.678072	5.33628	5.53574	3.62994	6.14995	0.594549	1.26303	7.4002	4.13586	6.45894	7.27752	6.77202
ACH-000737	0.163499	0	5.96509	3.11936	3.20163	0.0426443	0.275007	0.400538	6.99628	4.17632	1.9222	3.16511	3.9982	3.11103	1.90689	0.333424	4.88801	6.55658	3.64962	2.98732	5.99413	4.72629	5.25739	1.20789	0.0565835	0.298658	0.475085	6.02791	7.76295	5.96093	2.97453	6.69669	5.25965	2.50335	6.86592	4.29425	4.97315	0.163499	5.72629	0.214125	5.10978	5.46728	4.54226	4.81865	7.678	3.9982	6.38059	4.79857	6.36282
ACH-000548	5.23802	0	6.46369	1.97453	3.17153	0.400538	4.68874	5.8268	5.14649	3.853	2.68257	5.09339	5.31034	0.0285692	3.56438	0.111031	4.80941	6.88631	5.17871	4.24031	5.49121	6.27426	7.27184	5.0009	0.485427	1.67356	0.565597	4.58256	6.41819	3.84699	0.0840643	7.15289	2.37851	3.23419	3.17792	2.16672	3.34483	3.08406	5.86987	1.09761	4.07468	6.5601	0.713696	0.432959	7.17523	2.19219	5.57592	4.14568	7.44584
ACH-001839	4.91025	0	7.08502	2.75275	3.76129	0	7.12298	7.23285	4.73173	3.44758	1.61353	2.5008	5.2521	2.22342	0.201634	1.57046	2.97269	5.53854	4.22265	1.99639	6.2034	5.76075	5.1819	1.04963	0.275007	0.0143553	1.73985	3.51602	6.83327	3.15381	0.0703893	6.42089	0.367371	1.87578	2.32193	2.29278	3.67243	1.68257	4.93263	6.09866	3.39232	3.57894	0.485427	2.32193	7.45664	3.03562	7.10161	2.20477	6.75315
ACH-001799	5.11645	0	6.96093	1.67807	3.56438	0	6.65778	5.85649	3.65076	4.31759	2.73118	3.37573	4.9364	3.10601	1.45943	0	3.10098	4.68482	4.32048	2.52857	4.35614	5.47281	7.70099	0.485427	0	0	2.36177	4.96809	6.30086	3.49442	0	6.5127	1.852	3.49185	3.84197	0.176323	3.17792	0.669027	3.99095	5.58316	3.09085	5.88166	0.367371	3.24945	5.24907	0.0976108	5.74685	2.5435	8.05859
ACH-001573	2.04264	0	5.02636	2.51854	1.926	2.17632	5.08108	0.367371	3.34199	4	1.41684	2.85798	4.30961	1.68257	0.0285692	0	2.53605	3.10266	3.68594	3.78764	4.24489	4.15623	5.14568	0.163499	0.0285692	0.0285692	0	3.45418	5.25248	2.77189	0.0285692	6.0676	0.0143553	0.124328	4.35966	0.475085	3.72247	4	3.54226	3.42089	4.27352	6.84674	1	0	5.86567	0.918386	4.90111	6.81545	6.52935
ACH-000425	4.75007	0	6.11312	2.37851	3.48414	0	0.748461	6.47314	3.5008	3.80219	3.31034	5.40599	5.86518	0.124328	1.21412	1.23879	4.02768	5.06609	4.9241	3.75809	5.40463	5.61206	7.77426	0.454176	0.0426443	0.250962	0.0143553	7.20144	5.61235	3.57773	0.201634	6.83971	2.0072	0.0840643	1.70929	4.46858	3.52732	1.8953	3.76235	3.89336	4.63865	5.82171	0.659925	4.04439	7.04177	4.7126	6.52027	4.09085	8.52317
ACH-000375	3.50208	0.0143553	6.1035	2.53107	3.26903	0	0.704872	3.74524	3.22497	4.69042	2.73985	2.70487	5.49281	0.0285692	4.04789	0.0976108	4.5292	4.83693	4.58135	4.05572	5.11562	6.09128	7.08044	0.0840643	0.0426443	0.0703893	0	3.78241	6.93168	3.39094	0.163499	6.16651	0.275007	7.14017	4.92884	4.39163	4.55397	0.0840643	4.89288	0.124328	4.91886	6.6585	0.604071	0.0703893	7.41979	2.98368	6.2681	7.28235	7.26435
ACH-000753	3.83996	0	6.08725	2.26003	4.42223	0.0285692	0.367371	5.90256	4.1375	4.54411	3	3.56194	5.48575	2.70929	3.15218	0.250962	3.48414	5.1918	3.50589	4.02059	6.26679	6.32661	6.28225	0.189034	0	0.411426	0.555816	5.46923	8.03067	4.52419	0	7.59991	2.38128	0.0426443	1.68706	2.39232	4.67864	0.298658	4.30159	5.20789	3.56316	6.68608	0.31034	2.4957	7.62227	0.250962	6.26266	2.52857	8.77449
ACH-000275	3.9486	0	6.05983	2.28983	2.3978	0.0426443	6.97453	6.70833	3.61589	3.47768	3.12433	6.2363	4.55029	1.30451	3.59694	0.0840643	5.0751	5.68201	4.47054	2.67582	5.71727	5.77215	9.99181	0	0.0143553	0.0703893	0.0703893	4.22342	8.42148	4.09001	0.163499	6.19653	0.941106	2.51602	0.201634	1.87971	4.33914	0.704872	5.45121	7.25984	3.34341	6.39797	0.678072	0.176323	6.7366	3.36036	6.09677	8.02447	6.89494
ACH-000735	4.41414	0	6.32193	1.90689	3.93263	0.137504	4.05658	6.08044	4.26379	4.01436	3.25096	4.52544	4.849	0.0285692	3.24336	0.0285692	3.69377	4.851	3.83592	2.60407	6.87184	5.23534	6.93581	2.02503	1.44361	0.0840643	2.17632	5.14486	7.41667	4.32984	0.0976108	6.86121	2.30743	2.04264	0.773996	2.95233	3.9241	2.58015	3.853	4.26454	3.08406	4.08321	0.111031	0.704872	6.86518	0.773996	5.83238	3.55213	7.70591
ACH-000654	0.0703893	0	5.98277	2.27798	3.71039	6.88007	0.137504	0.286881	4.32193	4.91648	2.59694	3.5472	6.21607	2.05311	0.0840643	0.0285692	3.62994	4.16672	4.54473	4.18982	4.8525	6.69711	5.06652	0.0143553	0.0840643	0.0703893	0	4.04963	5.91552	4.50016	0.0285692	7.02724	0.0840643	0	2.38405	0.15056	2.1635	0.0703893	4.31976	0.124328	4.19692	6.7148	0.422233	0.0285692	6.55566	3.50843	6.57773	0.400538	8.50482
ACH-001067	4.22651	0	6.8759	2.62761	3.76765	0	5.55551	5.69627	4.29866	4.53916	2.64847	3.49185	5.58105	0.0565835	1.73552	0.0426443	3.9607	5.15623	4.62117	3.31179	4.78503	6.06975	6.69279	0.0143553	0	0.0976108	0.0143553	3.60999	5.9674	3.26903	0.275007	6.11853	1.5656	1.45943	0.970854	5.46826	4.27873	0.400538	5.08023	4.69377	4.07724	5.48543	0.604071	3.71918	7.36894	2.87578	6.58616	3.74201	7.2829
ACH-000170	4.03386	0	6.19061	2.72247	4.07039	0.411426	6.33985	6.46123	5.55827	4.01792	3.0054	4.86888	4.91313	1.65535	4.83289	0.464668	4.66562	6.71273	5.17513	4.1643	4.33056	5.13258	7.83048	0.765535	0.0285692	0.0976108	0.275007	4.25475	5.27798	4.31904	0	7.80478	1.36737	1.74846	5.25475	1.09761	4.15381	2.31615	4.57531	3.41143	4.29866	7.80368	1.15056	3.94953	6.18587	1.1177	4.67129	2.87774	7.21626
ACH-001394	4.32625	0	6.54628	2.3505	3.01078	0.124328	2.43829	3.99548	5.56894	3.96901	2.57046	3.60526	5.1375	1.83592	3.81352	0.0285692	3.99639	4.90689	4.68426	3.98003	3.44361	5.09339	4.74147	0.505891	0.0976108	0.15056	1.02857	2.72901	5.59395	3.36036	0.0565835	6.02879	0.948601	0.669027	2.98185	1.46467	3.29278	2.57531	4.38336	6.69391	3.13258	5.07767	0.238787	1.59455	6.65478	1.65076	5.7412	2.44095	6.93286
ACH-000404	4.13093	0	6.14832	2.46989	4.18824	0	2.19849	7.03144	4.12846	4.37156	3.01257	3.9542	5.38819	1.71809	0.163499	0.422233	4.1035	5.83517	5.32085	3.16832	5.19338	5.55367	8.50835	0.214125	0.163499	0.201634	2.91648	7.01714	6.46793	4.05832	0.713696	7.56704	2.03914	1.40054	3.40871	3.51854	4.33128	1.86394	4.19219	1.37851	4.07724	6.4165	0.659925	5.17552	6.88789	3.77505	6.48253	5.99639	8.25611
ACH-000882	3.33914	0	5.90111	2.20163	3.66107	0.0143553	0.344828	6.4065	3.61941	3.69265	3.40599	4.36807	5.58286	0.0426443	1.43296	0.495695	4.48414	5.81686	4.94486	4.66448	4.91121	5.61824	9.0187	0.0285692	0.0703893	0.0565835	0	6.44807	4.80529	4.29646	0.31034	7.93493	0.0565835	0.0976108	0.250962	4.16832	3.93168	1.46989	4.20242	3.29572	4.31252	6.22052	0.536053	4.34341	7.0421	4.32841	6.82056	6.92208	8.24051
ACH-001509	3.12102	0	5.98709	1.76977	1.9222	0.464668	1.93357	4.60229	4.42291	2.68706	1.86394	3.21257	3.57289	0	4.17393	0	3.37434	3.91839	4.1819	3.65992	4.33271	3.38681	6.39043	2.47768	0.731183	0.0703893	0.0565835	4.57713	4.849	3.19219	0	6.3512	0.871844	1.99277	0.678072	0.584963	1.8953	1.07039	3.34056	1.18269	3.57894	5.51854	0.432959	1.13093	6.5938	1.44361	4.72247	0.918386	5.79312
ACH-000210	4.42223	0.0703893	5.20046	2.70708	2.70929	0.0285692	0.0976108	0.263034	2.99095	5.05528	3.45943	4.08491	5.0691	0.0565835	3.35896	0.378512	3.35191	4.92647	4.21723	3.73985	6.7385	5.46695	11.0849	0.0565835	0.137504	0.0565835	0.0426443	4.16752	5.41177	3.6017	0.275007	6.22188	3.37573	0.62293	1.27501	5.66135	2.28096	0.163499	4.98277	3.95977	4.03386	7.11686	0.286881	2.64155	6.91862	4.39643	5.9493	1.37851	7.39163
ACH-000254	4.73823	0.111031	5.99367	2	2.89918	0.226509	2.93734	6.34696	4.0268	3.88655	3.12763	5.32984	4.79805	0.0285692	3.23726	0.400538	3.71699	4.07382	3.65878	2.41684	6.02148	5.02104	7.59081	2.33628	0.713696	0.454176	0.887525	5.11437	6.67158	3.68706	0	6.55444	1.05658	1.46467	0.201634	2.91073	3.43296	2.87184	5.99774	5.73064	3.30012	5.13545	0.443607	2.39232	6.87517	0.831877	5.50016	3.12267	7.15745
ACH-000604	0.214125	0	5.29572	1.60407	3.06005	0	3.28983	5.53916	3.88753	3.66334	1.63691	4.62761	5.6094	2.22342	1.28688	0	3.05485	4.56925	3.77294	2.14078	5.32553	5.70099	5.51001	0.0565835	0.0143553	0.0285692	0.0143553	4.66164	6.63154	2.45681	0.0840643	5.55919	0.879706	0.713696	3.74416	1.76977	3.1177	3.48285	6.99673	3.06867	3.78973	5.29536	0.189034	0.0565835	6.75101	0.356144	6.31325	4.48478	8.53395
ACH-000090	5.30378	0	6.23993	1.5008	3.57773	0	1.58496	5.69098	4.51159	4.31976	2.67356	4.50208	5.62498	2.26003	5.39951	0.0143553	4.27947	5.35014	4.16269	2.81558	6.73322	4.84649	7.25663	0.604071	0.0426443	0.0426443	1.28096	3.7148	5.80168	3.69822	0	5.779	1.65535	1.25701	2.15381	3.2854	3.16027	0.464668	3.6893	3.5656	3.1127	6.44493	0.321928	1.1635	7.11551	1.52607	5.32733	2.24489	7.38526
ACH-000195	2.40871	0.137504	5.9607	2.24793	4.08916	2.13422	5.85748	5.34127	5.60999	4.9991	2.28096	4.27501	5.77952	2.74631	1.28688	0.0976108	4.61765	5.85773	5.68874	5.44029	5.50843	5.91456	8.06399	0.0143553	0.0703893	0.0143553	0	5.07852	6.81468	3.48414	0.0285692	7.17383	0.15056	1.27501	4.47508	1.16993	4.72028	5.38094	5.88093	5.0072	4.22728	7.90995	1.04264	0.0565835	5.55766	0.594549	6.09487	7.85705	7.85817
ACH-001791	3.76765	0	4.0063	1.20163	1.4489	0.575312	0	5.80323	1.57046	5.91672	2.39506	2.87381	4.32048	1.75275	0.594549	0	2.65076	3.11603	2.60881	2.774	4.31615	2.56071	6.92505	0	0	0.0285692	1.4957	7.09972	4.97636	2.46467	0.992768	4.97774	0.475085	0.333424	1.53107	2.36737	1.77821	0.411426	3.63923	3.94205	3.41414	4.73715	0.565597	2.78869	6.17891	1.57531	4.71094	4.15381	5.67976
ACH-001650	5.10098	0	7.15927	2.04614	4.37434	0.0143553	1.07039	7.04701	3.17153	3.98823	2.04264	1.81147	5.67779	0	6.54381	3.31179	4.61648	6.04701	4.53792	2.40327	6.06242	5.21296	7.96058	0	0.0285692	0.0565835	0	3.62994	6.59305	3.57894	0	6.10978	4.3875	2.69599	3.62877	3.60644	2.96717	1.97453	5.47444	6.38767	3.3978	4.76553	0.443607	5.78947	7.66839	0.963474	6.20867	4.44427	7.50787
ACH-000605	5.02237	0	6.30086	2.20789	4.10769	0.298658	2.76977	5.40054	8.60274	3.9542	2.60644	3.66334	4.68313	1.32193	3.848	0.111031	4.0798	6.03342	4.86394	5.54967	5.21801	5.38922	5.56834	0.555816	0.137504	0.378512	0.0565835	4.33985	6.63793	3.75168	0.214125	5.87873	3.6565	1.73118	2.37851	2.79077	3.97269	2.60407	4.08661	2	4.16672	6.23917	0.485427	1.26303	6.64875	2.62761	5.96278	4.81352	7.25172
ACH-000458	3.65306	0	6.86925	1.88753	2.50335	0.0285692	0.970854	5.38509	5.99526	3.52105	3.72137	4.37504	5.13258	0.0143553	2.69153	0.0143553	4.63865	4.88996	5.17073	3.67694	6.72656	4.74631	7.92023	2.88947	0.0143553	0.0976108	0.378512	5.57471	6.78306	4.62352	0.111031	6.38871	2.69822	2.75061	0.15056	3.73877	3.65764	1.31034	3.80529	2.18587	3.03034	6.03628	1.15056	0.978196	6.62936	0.9855	5.97911	3.0197	8.09803
ACH-002084	5.01881	0	7.12557	1.95977	4.10182	0.0285692	4.13258	6.02746	3.74631	4.54597	3.23266	4.27352	5.37469	1.73118	0.0143553	0.189034	4.7241	6.26978	4.7447	2.21101	4.29425	8.64057	8.35129	0.0840643	0	0	0	5.60259	6.23074	4.71918	0	7.94005	1.71809	0.15056	2.98368	4.16269	4.10434	1.65535	3.56438	1.65992	4.24793	4.31832	0.863938	2.22033	6.65964	3.41007	6.71658	2.15056	8.30652
ACH-000004	2.59932	0	5.31034	2.46728	3.92695	0.918386	4.95791	3.91265	4.87873	4.97131	2.69377	4.72028	5.10769	2.72901	1.0072	1.27501	3.34483	3.34056	4.91169	4.68482	5.23649	5.90376	6.34056	0	0.0285692	0.0426443	0	5.29682	5.47249	4.0009	0.0426443	7.49801	0.464668	0.0426443	5.06695	0.454176	4.89676	2.92029	5.2854	2.95606	4.1235	6.83895	0.963474	0.0143553	6.36545	0.389567	6.21917	6.15178	8.69585
ACH-000251	3.99186	0	7.17702	2.01792	3.26454	0	0.863938	5.9465	5.91791	4.43496	1.80323	2.80529	5.48253	3.03738	0.799087	0	4.43829	5.69488	4.73444	2.45943	4.9528	5.63952	8.26683	1.07039	1.7137	0.298658	2.30159	5.19613	7.08481	3.64616	2.37016	6.14649	0.214125	1.74846	2.93546	3.03034	2.80529	2.02857	5.99118	7.63546	2.95977	5.59036	0.163499	2.36177	6.78882	1.33342	6.87209	2.39232	7.31442
ACH-000241	0.918386	0	5.39678	2.53854	3.31615	0.298658	4.97453	4.39094	6.36807	4.39094	1.23879	2.97453	5.25134	1.97085	0.163499	0.333424	3.04614	5.20789	4.393	3.13914	4.20945	5.49185	4.87283	0.0143553	0	0.0426443	0.495695	3.61353	5.05745	3.45943	0.0703893	6.9814	0	0.111031	5.24413	0.124328	5.13011	3.40463	6.1058	5.39403	2.89724	6.87307	1.14405	0.137504	5.91504	0.31034	5.47606	5.43596	6.82642
ACH-001194	4.03562	0	6.80929	2.30159	3.94392	0.0565835	7.81481	6.05072	5.87086	3.90207	3.21723	3.78555	5.27984	2.75489	2.10434	0.137504	4.23189	5.36842	5.33664	3.46205	4.68706	5.73145	7.22352	0.163499	0.124328	0.189034	0.201634	3.75809	7.34154	4.13914	0	6.54489	2.58976	0.722466	1.9222	1.37295	4.51223	2.90689	7.00259	7.68208	3.88557	5.59694	0.807355	1.10434	7.39223	1.24489	6.41058	4.55949	7.81378
ACH-001443	3.9486	0	7.47265	1.9855	3.33771	0	3.64616	4.97269	4.56071	4.73227	2.774	3.57894	5.74201	0	0.286881	0	4.0635	6.20555	4.00899	3.18903	4.47444	6.15805	6.76607	0	0	0	2.29866	6.13134	5.56682	3.66789	0	6.88399	0.0840643	0.0840643	0	1.5656	3.93357	2.1177	5.779	6.14037	4.15381	5.09761	0.495695	2.82782	7.24869	0.214125	5.749	3.86196	8.04794
ACH-000688	3.23879	0	5.98664	1.56071	4.0009	0.0426443	4.82426	6.32301	5.64904	3.57531	2.74201	3.7939	5.65907	0.475085	4.17473	0.0285692	3.63343	5.94087	4.04527	1.95606	6.06156	5.34163	8.0821	0.704872	0	0.356144	2.76765	4.42962	7.94796	4.00809	0.0285692	5.9486	0.137504	1.87184	1.0072	0.903038	3.88166	0.189034	5.17911	0.695994	3.08576	5.47962	0.275007	0.333424	7.27938	2.98003	6.59783	4.90014	8.01195
ACH-000405	0.823749	0	6.48671	2.99639	3.6241	5.97361	0.0976108	3.59455	3.85798	4.22651	1.15704	2.85798	5.67412	3.21412	0.189034	0.263034	4.56133	5.89312	4.98823	3.33485	4.9982	7.38301	7.47395	0.0426443	0.0976108	0.895303	0.0143553	4.85798	5.87332	5.20398	0.111031	7.10161	2.48027	0.0285692	4.58075	3.26604	2.67356	2.87971	5.93475	0.422233	3.74093	6.71822	0.286881	0.0285692	7.16672	2.41684	6.27668	1.21412	7.92861
ACH-000821	1.91073	0	6.18289	2.27798	3.78764	0	0.238787	5.22497	4.12681	3.41549	2.36737	4.74631	4.68201	1.97453	0.321928	0.0285692	4.33056	6.70127	5.00854	2.40054	5.78241	6.89227	0.773996	0.189034	0.0840643	0.137504	0.344828	3.55704	5.99639	4.25776	0.0840643	6.49586	0.163499	0.0143553	0.454176	0.163499	3.19219	4.30305	7.2426	1.28688	3.57289	6.05637	0.722466	0.0703893	7.02547	0.978196	5.80038	1.3505	7.56117
ACH-001677	0.0143553	0	5.99005	2.94673	4.82222	0.189034	0.0143553	0.739848	3.86592	4.97085	2.45681	2.71149	5.34731	2.53854	0.356144	0	3.66448	6.46369	5.02591	3.06867	5.46107	6.00428	4.79025	0	0	1.31615	0.250962	5.71425	4.95884	4.14975	0	6.10329	3.53356	0.963474	0.650765	0.0426443	3.03034	0.632268	3.42358	0.0426443	4.05311	6.90701	0.536053	0	7.91139	2.51096	5.5741	2.10098	7.68278
ACH-001627	4.77452	0	6.70874	1.75275	3.28244	1.21412	4.17632	5.73173	5.69516	3.44758	2.81352	3.45154	3.84298	0	5.02459	0.176323	3.69488	5.48543	3.85898	3.36036	4.17313	4.25475	5.39712	2.12102	0.176323	0.238787	0.0143553	4.6865	5.78215	2.9855	0.0840643	6.16892	0.871844	0.238787	2.20163	0.910733	2.60407	1.83188	4.31904	4.91982	4.09677	5.96694	0.31034	0.565597	6.64933	0.659925	5.0955	2.17313	6.44045
ACH-000951	4.68986	0	6.25115	2.63691	3.9241	0.0426443	0.62293	6.25191	7.06501	4.2817	2.81147	4.30451	4.81352	4.19692	3.54597	0.137504	5.31361	6.68804	5.75462	2.75702	6.2294	6.21179	7.39951	1.98185	0	0.333424	0.176323	4.01703	7.083	4.92884	0.0840643	5.75275	0.367371	5.11228	6.18963	4.70432	4.08661	1.16993	6.20711	3.21412	3.39094	6.11353	0.464668	0.0426443	7.98675	1.99639	5.45286	5.6094	7.88179
ACH-001036	0.137504	0	6.24394	2.12433	4.32193	1.43296	6.27538	4.8674	4.55949	5.11977	1.98185	3.16511	5.58376	2.53605	1.42761	0.613532	3.02148	5.60348	4.64962	3.2854	3.69711	5.97613	7.1468	0	0.0426443	0	0	3.89239	6.03188	3.40599	0	7.46205	0.124328	0.0976108	3.72901	0.963474	5.62877	4.05485	5.92172	4.42223	3.10434	5.34127	0.485427	0	6.44824	0.0285692	5.84197	5.41954	8.09698
ACH-000547	4.60466	0	6.28688	2.04963	3.61706	0.124328	0.0976108	6.94708	3.27352	3.23726	4.53916	6.41853	3.21878	0.15056	2.01792	0.250962	4.58736	5.39883	4.27128	2.98914	5.57713	6.1536	9.91004	0.773996	0.124328	0.286881	0	4.21878	8.6508	4.23955	0.0840643	6.43446	0.238787	2.33342	3.47119	1.73118	4.03298	1.4957	5.53201	7.30998	3.15218	5.25172	0.879706	1.92979	7.17852	0.956057	5.13175	6.38629	7.69905
ACH-000826	5.05355	0	6.59186	1.73985	3.78241	0.0840643	0.0703893	5.78712	7.24365	3.42626	2.26303	3.64962	5.17073	2.37016	1.65992	0.400538	4.14649	5.67864	4.40259	3.23419	6.10455	5.54102	6.44807	1.73985	0.163499	0.0285692	0.0143553	4.51159	7.52317	3.9542	0.124328	6.38974	0.124328	2.90689	4.80581	4.91504	4.28021	1.88362	6.17951	0.344828	4.02414	5.99752	2.1177	5.53387	7.15987	0.871844	6.39318	6.83415	7.53201
ACH-001147	0	0	5.09592	2.27501	3.22033	0.176323	5.06048	3.46597	3.51349	2.87184	3.87873	3.98094	3.70044	2.63227	0.0285692	0.0285692	3.26903	3.65764	3.96809	3.21568	3.35473	4.74953	5.2521	0	0	0.0426443	0	2.93357	4.70598	2.75702	0.0285692	5.63343	0.0426443	0	0.0840643	0	1.64616	1.48027	5.72247	2.18269	3.62176	5.36142	0.411426	0	6.11915	1.73552	4.76288	0.111031	6.30797
ACH-000162	0.0840643	0	6.42509	2.85	5.30195	3.90593	0.0703893	0.545968	4.21878	4.43095	2.39232	2.70044	6.13976	2.14405	0.367371	0.0143553	3.48543	5.02459	4.87332	3.83592	3.94392	6.455	5.29536	0.632268	0.0285692	0.0426443	0	5.48027	5.79779	3.6311	0.0426443	6.64198	2.57773	0.0426443	0.344828	0.333424	1.82375	0.0285692	3.01614	0.15056	4.07724	6.73971	0.575312	0.0426443	6.64645	1.82782	5.98254	1.70929	7.96982
ACH-001751	5.72601	1.0072	7.63539	2.45943	4.15137	0	2.7866	3.89627	3.34767	4.96394	0	0.895303	4.80529	1.5509	2.20163	0	3.06523	6.55152	4.95884	3.76129	5.32265	5.27314	7.79799	0	0	0.0426443	0.0143553	3.9982	6.12288	3.60407	0.687061	6.36405	5.31868	2.42492	1.58496	3.26903	3.83794	0	0.163499	6.74295	3.7137	5.56499	0.632268	3.31325	6.98128	3.03914	5.9364	4.31904	6.98539
ACH-000018	4.36947	0	7.26125	1.87971	3.5509	0.0703893	2.10769	5.8679	3.50589	4.15785	3.80012	5.16027	5.91456	2.09761	4.95466	0.0143553	4.1635	5.374	4.77979	4.05137	6.89821	6.11603	8.72124	1.52105	0.15056	0.0426443	0.15056	5.01346	7.75482	4.18507	0	6.73931	1.20163	3.86295	2.15056	2.852	3.926	1.48543	4.47314	5.04308	3.44626	6.50096	0.687061	2.0036	7.1416	2.58976	6.38319	4.58796	8.23993
ACH-000721	3.39232	0	6.13484	2.17632	3.09085	0	0.659925	0.263034	4.97591	3.74416	1.79909	2.58015	5.83238	2.16672	0.356144	0.0565835	3.37851	4.97774	4.25776	3.52857	5.34589	5.88704	0.757023	0.0703893	0	0.0143553	0	3.7126	3.64155	3.59813	0.31034	6.87184	2.02857	0.422233	3.60644	3.9991	4.09508	0.250962	5.18626	7.34837	4.02503	5.91672	0.389567	1.16993	7.02037	0.536053	6.67709	6.26134	7.84292
ACH-000003	6.03562	0.0840643	7.74477	1.852	3.8953	0	0.0565835	6.59798	4.73498	4.1416	2.12433	2.26903	4.81404	1.41143	2.38681	5.30889	3.91934	6.13175	4.60822	3.99367	5.89385	5.96324	8.22848	0.367371	2.51096	0.0426443	0.831877	3.78869	6.62439	4.83289	5.47573	7.1821	2.5656	0.887525	4.57954	5.81352	3.77926	2.04264	5.52325	5.24527	4.09508	6.24165	0.659925	3.86987	7.66085	3.83592	7.44501	4.55152	6.94977
ACH-000092	2.59694	0	6.47719	1.93357	4.32337	0.124328	0.275007	6.96901	3.77926	4.31615	3.24184	4.40939	5.74255	0.757023	4.40259	0.0143553	4.94251	5.45187	5.52042	4.64039	6.71039	7.01603	8.36072	0.137504	0.0426443	0.0143553	0.0703893	5.08746	7.44609	4.98368	0.0703893	7.01681	0.0703893	0.321928	1.8953	1.40054	3.62527	1.61353	5.5552	6.84386	3.39643	5.67723	1.21412	0.454176	7.26754	3.46989	6.63474	5.66221	7.74456
ACH-000669	4.11437	0	6.26247	2.77821	4.72683	0.275007	5.81941	6.00045	5.1981	5.12433	2.93357	4.33771	5.08066	2.50589	1.27501	0.536053	4.55582	5.20555	4.74147	3.29866	6.32409	8.08821	5.95327	2.41414	0.0840643	0.632268	1.54597	4.19061	6.74403	4.11437	0.0285692	6.85636	1.15056	1.78241	4.24869	3.7301	5.23343	1.88753	5.36282	5.89288	3.64962	5.98391	0.831877	1.37851	6.7137	1.52607	5.70404	4.7126	7.36886
ACH-001099	1.29278	0	6.01814	2.10098	2.83996	0.0426443	0.0703893	4.80219	4.22419	4.47962	2.87381	3.03562	5.09592	0.0565835	1.32769	0	4.50843	5.38888	4.91313	3.76447	5.26641	6.14812	7.9025	0	0	0.0143553	0.0143553	3.93452	7.25578	3.48027	0.189034	6.32679	0.495695	7.12681	0.400538	4.62585	5.39609	0.0976108	4.2555	0.613532	4.37156	6.74792	0.722466	3.82985	7.61897	4.19928	6.52513	1.51602	7.25484
ACH-000648	3.10098	0	6.39266	2.07039	4.05137	0.0285692	0.516015	5.6014	6.74255	4.23113	0.0285692	0.584963	5.63662	2.12102	3.0072	0.344828	4.44692	4.77189	4.42156	2.67807	4.89239	5.77637	7.17143	0.713696	0.124328	0.0565835	2.28096	4.44361	7.25673	3.83086	0.15056	7.14598	1.4489	3.51854	1.15704	4.25172	4.08491	1.53107	5.30305	0.333424	4.22882	6.6175	0.632268	1.15056	6.89724	0.632268	6.36859	4.82985	8.18388
ACH-000950	4.41616	0.575312	5.51916	2.24793	3.30743	0.0143553	0.333424	5.69237	5.52356	3.94111	2.69599	4.26379	4.82222	2.47768	2.33914	6.3966	4.59036	6.29866	5.11811	4.33771	4.9514	5.71864	6.47946	1.58976	2.28096	1.0072	0.454176	4.34696	6.16912	3.46205	0.286881	6.62439	2.5435	2.98003	4.94626	5.03386	3.46205	2.7137	4.5472	2.54597	3.7866	6.24375	0.748461	2.32769	7.84693	2.59216	6.2867	4.62585	7.63205
ACH-000050	0.111031	0	8.06781	3.57046	3.83794	4.11853	0.0703893	3.8268	3.70929	3.68145	1.92979	4.22419	5.20046	3.45418	0.594549	0.0976108	3.28096	4.46793	3.91552	2.58496	5.01659	6.12743	3.46597	0.250962	0.0285692	0.0976108	0.111031	2.46989	4.80632	3.59455	0.0426443	5.52199	0.757023	0.137504	3.32912	0.250962	3.12433	5.62556	6.64659	0.389567	3.42761	6.1819	0.782409	1.42223	6.52121	2.40327	5.91433	4.33199	7.28281
ACH-001106	0.15056	0	5.38128	2.12102	3.90689	0.189034	0.0285692	1.66903	3.1127	5.14364	2.35896	4.0054	6.18408	0.0143553	2.5656	0	2.87971	5.15866	3.23573	2.90881	5.54751	5.83238	8.48257	0	0	0.0565835	0.0143553	6.32679	6.59708	4.37643	0	6.18309	0	0.0285692	4.78293	2.52105	1.53605	3.24184	4.85898	0.0703893	3.22342	6.51349	0.0703893	0.0426443	7.61552	0.516015	6.41819	4.35332	8.24427
ACH-000367	2.21101	0	6.40582	1.39506	3.87774	0.0143553	1.91073	6.57531	3.48156	3.59335	3.18428	5.62381	5.53854	2.18587	3.53107	0.0840643	4.29352	4.85798	4.95187	3.52732	6.96266	5.78267	8.51952	0	0.0143553	0.0143553	1.63691	4.7252	7.85941	3.78136	0	6.81839	0.0565835	1.72683	3.46597	3.67356	2.77821	0.659925	6.3443	0.238787	3.37434	5.10852	1.48543	4.65764	7.51175	4.16672	6.58511	5.31034	7.66171
ACH-000589	5.02547	0	5.52826	2.70487	3.95513	0.0703893	0.137504	6.02569	4.50462	3.35614	2.64847	3.19535	5.58526	0.464668	1.24489	0.0143553	3.77083	5.63517	4.59515	2.95233	5.24793	4.4522	7.64306	0.910733	0	0.111031	0.584963	3.53978	5.84825	3.10936	0.15056	5.35614	0.0976108	4.1635	5.76607	4.88753	2.04264	0.613532	4.41481	6.3978	3.66221	5.33414	0.432959	2.65076	7.7224	1.71809	6.17612	6.07361	7.01592
ACH-000564	0.0285692	0	5.42122	2.74846	3.82579	5.63662	0.0426443	0.189034	3.73985	4.54164	0.0703893	3.71809	4.88899	0.992768	0.378512	0.137504	3.7126	5.48929	4.45549	2.13422	4.77716	5.65019	0.367371	0	0.0143553	0.137504	0	4.61706	4.49633	3.59216	0.0565835	5.42223	5.42055	0	1.32193	0.214125	2.28688	3.7137	3.97269	0.163499	2.63923	5.54473	0.432959	0.0426443	5.87406	1.89918	5.88069	3.4489	6.35209
ACH-001522	5.79623	0	6.92351	2.02857	2.7761	0.0703893	0.163499	6.1334	4.76924	5.27984	2.41414	4.88655	4.95373	3.2032	0.0976108	0.367371	4.45352	6.39866	5.08789	2.10434	3.90689	6.80452	7.6017	0.0426443	0.0426443	0.0285692	0	5.25399	5.19338	4.11103	0.189034	7.99447	2.24793	2.26903	3.59455	3.74093	4.38336	1.20163	3.99095	3.0054	4.47054	4.9397	0.555816	3.16027	6.2292	2.35614	6.04789	4.32048	8.22444
ACH-000831	2.74201	0	7.13679	1.55582	3.18745	0.0840643	3.89724	6.49681	4.53045	4.32409	3.10936	3.50462	5.78503	2.39506	5.05875	0.250962	4.10182	3.30743	4.72846	3.85499	5.10056	6.05918	5.24755	0.0976108	0.0285692	0.124328	1	4.49057	7.57251	4.17951	0.0703893	6.86567	2.22959	3.07382	1.53605	2.04264	4.40395	2.69153	6.10894	6.63822	4.09339	5.72356	0.669027	2.34483	6.44311	0.887525	6.04067	5.39541	8.37903
ACH-000424	4.51475	0	6.53962	2.31615	4.16189	0	2.0635	4.42425	4.29499	4.80684	2.58256	2.97269	6.11666	0.575312	3.40054	0.62293	3.56071	6.22959	4.44427	2.86987	5.98687	5.83592	9.32443	0.0143553	0.0426443	0.0426443	0.0143553	4.09845	5.41177	4.65306	0.124328	5.52544	3.853	5.88093	0.189034	3.67129	4.70155	2.84599	4.25852	3.61471	4.17552	6.75796	0.495695	1.66903	6.71699	2.6017	5.33593	5.38059	8.19692
ACH-000409	5.53356	0	7.12195	2.29572	4.12102	0.0143553	2.72683	5.36177	3.22497	4.78293	2.03562	3.48285	5.77268	4.08576	4.99548	1.49057	4.24793	5.6372	4.7137	3.17632	6.10727	5.38853	6.61102	0.0143553	0.641546	0.111031	0.0143553	3.9607	5.85	2.87381	0.275007	5.77215	4.31397	0.475085	2.47249	3.18745	2.56803	0.432959	2.77821	0.226509	3.47897	5.76102	2.07039	4.16591	8.42572	1.1375	5.20984	3.56682	7.96058
ACH-000616	4.73715	0.0565835	7.06544	2.34767	4.26303	0.0840643	2.93546	7.31025	1.58496	4.60703	3.76235	5.93404	5.6097	0.0285692	1.50589	0.933573	6.04177	6.15603	5.99729	4.47508	5.8824	6.44311	8.68387	0.641546	0.298658	0.124328	1.71809	5.90713	7.05441	4.25248	0.0703893	7.31506	0.0426443	3.94953	1.3505	2.75061	3.81352	2.28096	5.99299	7.38388	3.92695	6.75248	0.400538	1.59455	7.17443	1.26903	6.90376	3.09761	8.0873
ACH-000628	4.88118	0	7.23458	2.8953	3.76977	0.516015	4.38059	5.55428	7.30679	5.10852	2.73118	4.65363	5.51381	3.08916	7.22805	0.0143553	4.04089	4.27501	4.55827	2.848	6.28762	7.71335	7.82998	3.0036	0.0565835	0.286881	1.55582	5.24831	7.42752	3.53232	0.0840643	5.93428	2.15056	4.22342	2.47768	2.81147	3.42895	4.40395	6.23726	6.43263	3.73769	6.07017	0.505891	0.124328	6.90725	2.21723	6.45549	4.94953	7.84775
ACH-000512	0.0703893	0	6.89239	2.61589	4.65306	4.83996	0.263034	5.2709	3.904	3.60407	2.10098	4.87135	5.0063	0	0.400538	0.250962	4.37016	5.77109	5.19417	1.97453	5.55919	6.08576	2.56071	0.0285692	0.0143553	0.344828	0.411426	3.2765	6.0936	4.02059	0.367371	5.34199	0.111031	0.0426443	0.545968	0.378512	2.57773	4.52982	6.64097	0.505891	3.93923	6.53776	0.863938	0.575312	6.44741	0.823749	5.64039	0.613532	7.33289
ACH-000232	4.56133	0	5.89942	2.29866	2.9279	0.604071	0.275007	6.30907	4.77136	4.20633	2.6017	5.2426	5.47508	2.96717	1.02148	0.0426443	4.82426	5.62439	5.01748	2.69599	6.75515	5.9148	9.18336	1.43829	0.0285692	0.189034	0.584963	4.03474	5.63633	4.54597	0.163499	6.17113	5.34092	0.555816	2.46728	4.70099	3.8846	0.163499	4.5435	4.37643	3.93452	6.7028	0.321928	0.124328	8.2181	3.2765	6.67694	7.31985	7.56301
ACH-000820	4.69933	0	7.40131	3.27947	3.73118	1.07724	0.367371	6.48704	5.49729	4.59515	2.30159	4.1127	5.4192	3.08236	3.93263	6.34891	3.94017	4.91217	4.71973	3.851	5.48349	5.62761	8.67317	0.847997	6.24336	0.0565835	0.0143553	6.98925	7.25039	3.22651	7.70377	6.06867	0.0565835	0.0703893	6.16007	1.37295	2.50843	2.852	5.37121	2.06005	3.69599	6.12763	0.443607	0.0565835	7.48784	2.28392	6.43846	3.45812	7.71301
ACH-001295	4.92125	0	6.43646	2.33628	4.27501	0	0.0143553	0.0285692	4.63633	4.11187	3.10769	3.5097	5.81481	0.422233	6.02569	0	3.15866	5.73525	4.57652	2.99277	6.1373	5.79779	5.86839	0	0	0.0143553	0	3.79701	4.74147	3.47897	0.344828	5.94087	0.0285692	2.61353	0.163499	5.22265	4	0.0143553	1.02148	0.0840643	4.49378	5.16189	1.31615	2.66676	7.02768	4.15866	5.45516	6.23764	7.74389
ACH-001164	4.02768	0.0143553	5.33163	1.54597	2.0321	1.42223	5.72982	4.30743	2.82985	2.91456	0.565597	1.41143	4.35473	1.18269	3.38543	0.111031	3.08406	3.97911	3.04089	2.62059	4.6865	5.71122	9.2854	0.333424	0.0285692	2.37851	0.0285692	3.41549	5.86121	3.14241	2.48285	5.60229	3.21723	0.422233	0.847997	2.10434	2.16027	0.948601	2.64847	3.28392	2.99095	5.22882	0.432959	0.516015	7.30688	1.5656	5.87922	6.98925	6.49921
ACH-000806	0.0426443	0	5.98254	3.13586	3.59813	1.7137	0.137504	4.42021	3.24489	3.91169	3.99548	4.51791	4.74792	3.61235	0.0426443	4.5741	4.75542	3.36177	5.52325	3.42626	5.65793	5.86121	6.96128	0.137504	0.275007	0.163499	0.15056	4.71973	5.66931	4.63865	0.0840643	6.85437	0.0426443	0.0143553	3.28688	0.201634	3.88655	1.43829	8.76202	0.0840643	3.9222	6.43646	0.584963	0.0285692	6.70058	3.26454	6.65992	0.333424	8.01542
ACH-000645	1.91456	0	5.93805	1.45943	2.63227	0.0143553	3.32769	6.0781	2.93357	3.43829	1.96347	3.0054	5.0027	0.941106	2.87774	0.176323	5.24222	5.51475	4.4614	2.19849	7.43229	5.29205	8.96973	0.0840643	0.137504	0	1.02857	4.88313	7.224	4.05485	0.111031	6.50653	0.799087	2.9782	1.7866	4.97407	4.65821	2.56316	7.30268	6.06652	2.64847	5.46467	0.545968	2.23879	8.12288	4.70874	6.7765	7.29186	7.46426
ACH-000099	3.88069	0	6.04177	2.37295	3.52482	0.0703893	0.0840643	3.7366	4.56803	5.28318	1.23266	2.25399	5.15826	0.0143553	1.852	0.0285692	4.46597	4.94111	4.88655	3.30451	5.18587	5.10224	6.926	0.575312	0.0703893	0.0426443	0	4.20006	5.29646	4.66391	1.55582	7.14843	5.09297	0.0285692	8.16027	5.2724	3.64039	0.0565835	2.70708	0.545968	4.05658	6.37487	2.24793	1.17632	7.42114	4.08576	5.03298	3.90785	6.90905
ACH-000902	4.67638	0	5.897	3.14405	4.43095	0.0285692	0.0565835	3.59335	4.64674	4.91839	3.10434	4.41549	5.18745	2.0036	5.78712	0.356144	4.66903	5.1014	4.71149	2.60881	6.08895	5.78738	7.29545	1.0635	0.0565835	0	0	4.49378	6.49233	4.28762	0.0565835	6.14262	1.32193	0.903038	6.5735	5.04614	3.72356	0.0285692	4.5435	0.526069	3.08066	6.16631	0.137504	0.0426443	8.69704	0.659925	6.62044	4.84097	7.57486
ACH-000649	2.98732	0	7.11239	1.88753	4.47897	0	3.19377	6.8382	4.20085	3.86493	3.53978	3.89433	5.81147	0.214125	2.01078	0.0143553	5.47962	5.7301	5.21607	2.20163	5.36807	6.78542	7.99932	0.137504	0	0.0976108	2.27501	3.81352	7.12877	4.70044	0.0840643	6.99288	2.22959	0.0976108	0.713696	2.46205	4.89724	2.38405	7.42543	6.42811	3.86691	5.63778	0.815575	0.731183	7.94872	0.214125	6.29994	2.71809	8.00439
ACH-000086	0.757023	0	7.65778	1.61824	3.83794	0.0285692	0.815575	4.47962	3.21412	3.27947	2.70487	3.04264	4.79025	0.0565835	1.1635	2.67129	4.40735	5.4266	4.42156	2.87381	7.03287	5.87995	7.32742	0.15056	0	0.0285692	0.83996	3.65421	6.33432	4.45878	0.0565835	6.53652	0.137504	1.83188	0.15056	2.3978	4.05572	0.367371	6.6886	6.77439	3.97728	5.70874	0.765535	0.0565835	7.5815	2.43563	6.30323	1.90689	8.14292
ACH-000149	4.31976	0	6.29352	2.53107	3.76341	0	1.63691	6.07253	3.77926	4.8846	3.20945	4.12516	5.31723	0.176323	4.1914	0.0976108	5.32589	4.96763	5.35297	2.79077	6.2737	5.77426	7.46238	0	0.0976108	0.226509	0.0565835	4.92029	6.76951	4.66562	0.575312	6.99424	6.07146	0.15056	5.28133	4.80219	4.16108	0.201634	4.58736	1.79494	4.19928	6.25493	1.87578	3.7666	7.98647	4.57652	6.41261	4.44294	7.26416
ACH-000142	5.0045	0	7.06318	2.17951	4.33271	0.15056	1.9222	5.85	5.02281	3.95606	2.98368	4.09085	5.39266	0.475085	4.99458	0.443607	4.53107	6.60259	4.90063	3.24031	5.68032	4.79077	8.0172	1.14405	0.137504	0.111031	0.367371	4.04264	7.23419	4.10769	0.695994	7.25503	3.32193	3.90785	3.19535	3.03386	3.44361	2.22651	4.56986	5.49665	3.34767	5.98778	0.739848	1.69599	7.4002	1.5509	5.72874	3.05311	7.49873
ACH-000227	4.51602	0	5.64587	2.26003	3.66221	0	0.0703893	0.565597	5.01167	5.70598	0.0703893	1.7137	5.99571	0.356144	5.02414	0	4.14568	5.60466	4.81609	3.50716	5.44593	5.42223	6.22805	0.748461	0.137504	0.516015	0	3.94673	5.24679	3.38267	0.201634	5.88191	6.76022	1.29866	8.31438	5.14975	3.55704	0.0565835	3.49057	0.0143553	3.68594	7.28438	3.25248	2.27202	7.46818	4.20006	4.91025	4.60822	6.83567
ACH-000697	0.0565835	0	5.68594	3.01436	2.13422	5.2502	0.0840643	5.48349	4.20242	4.40735	3.29278	5.43263	5.39197	2.88362	0.137504	0.275007	4.24184	5.02015	4.82782	2.76129	4.98231	6.29039	0.925999	0.0143553	0.0426443	0.124328	1.7866	4.10182	6.48961	3.97177	0.0285692	7.02414	3.62293	0.250962	5.35226	2.90497	3.87184	4.90256	7.19495	0.31034	3.62527	6.65821	0.687061	1.22651	6.54411	1.84398	5.60377	0.495695	8.31393
ACH-000942	0.0840643	0	5.37365	2.53107	4.7137	7.76341	0.226509	3.46074	4.57652	5.58316	0.604071	3.52607	5.8268	2.10434	0.0426443	0.575312	3.86592	5.52074	4.64212	3.46205	5.40633	5.4663	9.56444	0.124328	0	0.0143553	0.0285692	5.72601	6.83731	3.90881	0.201634	6.65507	3.41954	0.238787	3.04439	1.26303	3.27352	2.57531	5.47671	0.163499	2.79909	5.66391	0.495695	0	7.55934	1.26303	6.03628	6.88056	8.49985
ACH-000264	4.2211	0	6.08364	2.64616	3.73444	0.0565835	5.28429	5.37955	4.08916	4.53232	2.07382	3.70155	4.66278	1.42223	1.23266	2.07382	3.49057	5.78293	4.83946	3.92884	5.44029	4.69209	5.79103	0.799087	0.0565835	0.565597	0.704872	4.95791	6.71836	2.87184	0.189034	6.53232	0.389567	1.22033	3.08406	2.488	4.77979	0.505891	5.40156	6.95292	3.79494	6.57773	0.250962	2.24184	6.68229	3.99548	7.09666	6.472	7.2903
ACH-000809	5.29719	0	6.94743	1.82782	4.06609	0.176323	5.20555	5.57954	4.77294	4.05224	2.63227	2.96162	4.74093	0.0285692	3.7126	0.0143553	4.83693	5.46303	5.13832	3.56071	5.08066	5.15299	5.47541	1.42223	0.505891	0.454176	0.536053	3.852	6.77716	3.67807	0.0703893	6.77413	1.774	3.03034	3.10266	0.83996	3.32481	0.678072	3.23113	4.1152	4.15381	6.04701	0.695994	2.62994	6.53107	1.10434	7.06048	4.44361	7.23084
ACH-000100	3.88264	0	6.75302	2.0635	4.25475	0.0285692	5.28466	5.49601	1.79909	3.90304	1.28688	1.20163	4.79857	1.44361	1.56071	0.137504	3.86096	2.12433	4.92695	4.16752	4.15785	6.14649	6.58436	0.0285692	0.111031	0.0426443	0	4.76765	6.33342	4.05572	0.0703893	6.91241	4.80632	0.704872	1.61824	3.82883	3.51602	0.0840643	0.604071	4.57833	3.82883	6.55551	3.94953	4.62059	7.0091	2.14405	6.24489	5.58646	7.85991
ACH-000060	3.55582	0	6.4707	2.38405	4.58256	0	0.669027	5.52136	4.61294	5.15137	1.60881	3.65421	5.83895	3.28392	1.45943	0.0143553	4.44559	6.10894	5.29499	3.26604	5.67384	6.69891	6.07895	5.89724	0.536053	0.0565835	0	4.1177	8.46119	4.53605	0.15056	7.02015	0.0703893	0.137504	5.07211	5.01391	3.84499	2.99095	6.87443	6.20574	3.87184	5.41549	0.555816	0.594549	7.88148	2.07382	6.44195	3.35191	8.42
ACH-000001	5.82349	0	7.36929	2.10098	4.22188	0.0426443	0.910733	5.67299	4.67638	4.01346	2.39232	3.23726	5.58256	2.83996	4.15381	0.659925	4.46858	5.24717	4.70377	2.89336	6.09128	5.87823	4.72792	0.111031	0.0976108	0.0285692	0.344828	3.89918	6.732	4.44559	0.111031	6.91672	4.27053	0.286881	4.25323	4.06005	4.07296	2.01078	3.91839	0.389567	4.22033	6.19436	1.98914	2.64616	6.90292	1.63227	6.19318	4.65992	7.49025
ACH-000957	5.03738	0.0703893	6.15987	2.43563	3.63343	0	0.0840643	5.91576	5.93263	3.92884	2.53854	4.41414	5.33307	3.20006	4.69766	4.96162	4.03914	5.90207	4.60526	3.76447	5.40293	6.32067	5.79986	1.95233	4.00809	0.0285692	0	3.80323	6.66491	3.91073	0.575312	6.3036	3.31904	0.111031	5.97016	4.95187	3.46074	2.52356	4.50208	3.64501	4.39575	6.22709	0.536053	0.0426443	7.36894	3.07382	6.26679	0.823749	7.80155
ACH-000650	4.55213	0	6.66874	2.43829	5.24982	0	0.799087	6.02547	4.05918	4.37016	3.03738	2.75489	5.97361	0.0285692	1.02148	0.887525	4.47249	6.07339	5.49633	3.27947	5.38819	6.12495	8.63797	0.0285692	0.0565835	0.111031	0	8.05918	5.67044	4.7761	0.189034	7.97039	1.51096	1.22651	1.56071	2.848	4.26078	2.11103	4.32697	0.226509	4.5552	6.25342	0.918386	5.01525	6.6946	3.26153	6.04439	4.27501	8.8079
ACH-001096	4.55949	0.163499	6.40173	2.22342	4.67016	0	5.23611	5.15097	1.1635	3.75916	1.48543	1.22651	5.31034	0.963474	0.941106	0	3.03386	4.55766	4.66221	3.47508	3.64616	5.08151	6.69418	0	0	0.0703893	0	3.8125	4.57531	3.40054	0.344828	6.13914	3.28688	0.263034	0.722466	3.27798	3.07724	0	3.23879	3.52105	3.59096	5.54751	0.263034	2.85798	6.6222	0.704872	5.59813	4.77189	7.79025
ACH-000239	0.0840643	0	6.3127	2.5008	3.67129	0.0703893	0.0565835	6.47752	7.08831	5.85125	2.82579	3.92125	5.29793	3.24031	2.78869	0.863938	4.71809	6.67638	5.6014	3.40735	6.02237	5.2765	4.71589	1.40054	3.15056	0.15056	0.0143553	5.42593	7.28836	3.69822	0.545968	6.18606	0.0285692	0.0143553	6.52748	2.88947	4.19377	2.96901	4.87922	4.79649	3.81762	6.10035	0.555816	3.11103	7.5611	2.65306	6.74133	6.10685	7.96849
ACH-000762	4.42425	0	6.56742	2.35332	4.53667	0.275007	4.27277	6.11207	4.97911	3.87086	3.64616	5.25626	4.44294	0.137504	4.16672	0.111031	4.43763	5.40122	4.66959	3.15543	7.15502	4.42694	7.26632	2.38957	0.15056	0.516015	0.263034	4.6153	6.12639	3.19535	0.137504	6.75596	3.27202	1.07724	0.545968	2.74846	3.81865	1.82782	5.96901	2.41684	4.06523	5.01346	0.62293	2.52356	7.36842	0.485427	5.41041	1.73985	7.27454
ACH-000922	0.0976108	0	5.40293	2.27798	4.15218	0.0703893	0.124328	0.799087	3.73985	5.32697	0.641546	2.21101	6.13031	0.0143553	3.4019	0.0143553	2.86394	4.38819	3.5509	2.81558	5.61471	6.54102	6.8993	0.0703893	0.0426443	6.88411	2.47249	5.08321	5.89603	3.52607	0.0285692	6.13114	0.0565835	0.0565835	1.1177	0.925999	3.20633	1.83188	3.36036	0.124328	3.29719	6.52388	0.536053	3.34199	7.6034	3.14405	6.15522	6.72833	7.79747
ACH-000859	6.00742	0	6.67709	3.48414	5.28133	0.0426443	4.35473	5.84071	7.31895	4.9472	2.68482	4.19771	5.74255	3.2765	6.20672	0.137504	4.70819	5.79805	5.21101	3.29866	5.99345	6.749	8.54978	1.0072	0.275007	0.275007	0.163499	4.69822	7.97068	4.04264	0.485427	7.164	1.65535	3.75168	4.42358	5.2765	2.98185	3.95884	5.05658	5.10727	3.774	6.03716	0.400538	1.21412	7.71514	1.20789	7.163	1.68706	7.57818
ACH-000990	5.98277	0	5.51001	2.16672	3.01436	0.0703893	0.0976108	6.53372	4.9331	4.67469	2.59455	4.33557	5.29057	3.60407	4.55397	0.0426443	4.65306	6.774	5.70487	4.66676	5.63894	4.75489	1.4957	0	0.111031	0.111031	0.0143553	4.84449	6.99639	4.01703	0.201634	7.57266	3.27947	1.38405	4.69432	5.65964	4.58556	2.73335	5.4192	0.773996	4.97682	6.8249	0.823749	0.0285692	7.61817	2.04963	5.74066	3.66789	6.55228
ACH-000410	4.27202	0	6.07767	1.91456	4.24717	0.0285692	0.879706	7.55674	4.73985	4.90737	3.55459	4.78816	5.94439	2.7866	0.85599	0.0840643	4.92362	5.67243	5.19574	2.69153	6.26153	6.89324	9.26599	0.0976108	0.0565835	0.201634	2.85798	4.4522	6.60288	4.21335	0.0285692	6.71039	3.44626	1.91456	1.83188	1.73118	4.80478	0.0703893	4.0321	2.52857	3.96993	7.48148	0.422233	2.36177	8.0873	0.695994	5.58856	6.45796	8.41654
ACH-000927	2.76341	0	7.33789	4.01078	4.6094	0	0.0426443	3.99367	4.86394	4.50716	1.21412	2.73985	5.74497	1.96347	4.61235	0.214125	4.23879	6.11645	4.63401	3.62059	7.23946	5.45648	7.94339	0.201634	0.0703893	0.0565835	0	4.25701	10.4666	3.61941	0.782409	6.44377	2.22959	0.0143553	5.99186	4.58195	3.07895	0.137504	4.29939	0.367371	3.20945	5.71562	0.495695	3.76447	8.01497	1.54597	6.50732	3.31759	7.23218
ACH-001853	5.2426	0	5.82706	2.44095	3.23113	0	1.53605	4.77452	5.38957	3.75489	1.97453	2.9542	4.24413	3.03386	0.669027	0	4.5741	5.66562	4.79701	2.34767	5.95373	6.19712	6.2724	3.98277	0.0426443	0.823749	0.238787	3.55582	7.53216	4.03034	0	6.92362	0.0143553	0.124328	4.9331	3.13258	3.11603	1.87578	6.33718	0.176323	4.10182	4.18587	0.298658	0	8.07146	1.82375	6.39729	4.14568	7.05507
ACH-000694	4.9528	0	6.25965	2.47508	3.66107	0.0565835	3.94953	5.16631	6.53838	3.72465	2.68482	4.45812	5.61794	1.40599	5.34625	0.0285692	4.12598	5.11353	5.23993	4.14405	5.88387	4.43429	6.44923	0.632268	3.10601	0.0976108	0.505891	4.61765	7.05539	3.85997	0.378512	6.7339	4.44361	2.69599	1.61353	2.18269	3.37156	2.16027	4.31832	4.03562	3.774	5.88387	0.378512	0.286881	6.62161	1.66448	6.2077	4.23496	7.47322
ACH-000935	4.06867	0	6.23036	1.83996	4.1035	0.0143553	3.74524	6.40565	2.41414	4.30889	3.2765	4.55827	5.17871	0	0.124328	0.0285692	4.15299	5.63372	3.95977	2.58736	7.02314	5.80012	8.30738	0.0143553	0	0.0565835	0.918386	7.19417	7.23391	4.43496	0	6.67596	0.176323	0.111031	0.879706	3.54473	4.3978	1.44361	6.18349	4.0063	3.15381	5.40973	0.526069	1.54102	8.02591	4.10518	6.64602	0.516015	7.25861
ACH-000918	0.422233	0	5.71809	3.15866	4.04614	2.20163	0.0565835	0.411426	5.31687	5.19771	2.57046	5.05788	5.43829	2.38128	0.389567	0.124328	4.68986	0.555816	5.25663	3.36737	4.87774	5.51065	7.88698	0.298658	0.0426443	0.0703893	0.0143553	4.77768	7.48977	4.14323	0.0426443	7.73505	0.782409	0.0426443	2.31034	2.06005	3.69377	4.56803	3.83289	1.13093	3.64847	7.18676	0.871844	0.0143553	7.87633	2.65535	5.64904	0.584963	7.78333
ACH-000761	3.66107	0	7.43621	2.44626	3.63807	0.176323	4.1035	7.01302	5.90159	4.0321	2.94111	4.18031	5.52482	0.545968	4.59813	0.176323	4.16189	5.50716	4.04439	2.74846	6.64789	7.02669	7.10003	1.74846	1.58015	0.321928	2.0635	4.77558	7.94017	4.60348	0.0703893	8.37834	3.26454	2.30743	3.08236	3.46989	4.8125	3.13093	4.81967	0.970854	3.11936	4.47119	0.0565835	0.298658	8.01235	2.73118	6.53216	4.44228	7.7339
ACH-001563	3.20006	0	6.58496	1.87971	3.64962	0.0285692	2.926	5.6427	3.12433	3.22033	2	2.79077	4.53792	0.0143553	0	0.0285692	3.57289	6.68566	4.31687	2.33342	5.19495	5.8802	8.41079	0.0143553	0.0285692	0	0	4.848	7.23007	3.82171	0	6.2724	0.0143553	3.02326	1	3.6017	4.9514	0.0285692	5.0955	7.97057	3.05311	5.03782	0.641546	4.55643	5.99367	2.68257	5.83441	0.632268	7.16118
ACH-000974	5.25285	0	5.97453	1.72683	2.33342	0	0.0976108	5.51381	3.42358	4.31252	3.1811	3.39369	5.10559	2.63691	3.18745	0.344828	3.75916	4.23802	4.0045	3.44626	5.83971	5.57137	7.01592	2.81147	0.632268	0	0.0143553	4.48993	7.13042	4.16189	0	6.02259	1.39506	3.33628	4.73769	6.2149	3.61235	2.37016	5.78738	4.11103	3.77716	6.46058	0.400538	0.0426443	6.81378	0.526069	5.75676	5.62439	6.52857
ACH-000297	2.82375	0.176323	6.03386	2.28096	3.48156	0.356144	4.19219	4.12763	5.36317	4.25172	3.73335	5.19613	5.61853	4.46271	0.632268	0.0285692	5.06953	6.4759	5.59604	4.2426	6.19042	5.42324	2.62293	1.91839	0.604071	2.01436	0	3.70487	4.28466	4.27426	5.52231	5.1643	2.53356	0.111031	6.6575	5.19219	3.58856	0.124328	3.87578	0.713696	3.82069	5.91456	5.63604	3.15704	7.90671	5.56651	5.50367	6.19692	7.43713
ACH-001719	6.15421	0	6.06975	1.62293	3.22497	0	0.201634	5.46467	3.7366	3.79597	2	1.85997	5.84649	2.92029	4.24565	0.505891	2.82782	4.18349	4.15785	3.99729	4.23802	4.76394	3.31325	0.189034	0.687061	0.0565835	1.12433	3.20006	5.93428	3.46467	0.0285692	6.87799	4.03914	1.19535	2.57046	4.25626	3.09255	1.43829	4.95233	4.76818	3.5656	5.26416	0.948601	0.176323	6.94169	2.70929	6.45121	5.5601	7.39815
ACH-000243	4.75809	0	6.97568	2.12102	4.40735	0	4.03386	5.71039	5.18785	4.26828	3.13586	4.07639	6.26866	1.66448	4.84398	0.124328	4.36597	5.73796	4.99458	4.28983	6.4446	5.66676	8.76338	4.22342	1.0072	0.536053	0.124328	4.99367	7.81941	3.60407	0.464668	6.48736	0.250962	1.24489	5.6893	4.49953	4.39985	3.09085	4.96855	3.70487	3.50335	5.51728	0.226509	1.3505	8.6097	1.5008	5.99118	5.85549	7.90575
ACH-001418	5.42526	0.0426443	7.20046	1.79494	3.6893	0.0976108	1.25096	5.45385	3.24945	3.18903	2.70487	4.26153	4.66334	2.73118	4.02857	0.0143553	3.60881	6.2636	4.37086	2.96162	5.90905	5.81429	5.64443	1.91839	0.0565835	0.0565835	1.77821	3.91934	6.50255	3.19849	0.485427	5.89288	2.19849	0.0285692	3.80426	4.19771	3.27352	2.41414	5.21956	0.214125	3.81044	4.50653	0.111031	1.1635	8.0027	0.925999	5.42492	6.09297	8.16687
ACH-000362	0	0	6.44112	1.7866	3.83086	2.35332	0.400538	5.23036	4.10852	4.53605	2.28688	3.41549	5.79364	0.0285692	0.475085	0.0285692	3.04963	4.50779	4.32769	3.3147	4.09508	5.63401	6.71548	0.298658	0.400538	0.0426443	0.0426443	5.50875	5.53823	4.44294	0	7.16732	1.42761	0.0426443	0.15056	0.422233	3.69265	2.35896	4.3147	0.124328	3.87873	6.62117	1.16993	3.48414	6.00652	0.632268	5.62848	5.62	8.38737
ACH-000843	4.1914	0	7.08842	2.26903	4.40735	0.0285692	5.09085	5.38716	4.78607	3.94767	2.95791	4.0268	6.43396	0.0976108	4.88801	0.495695	4.88947	6.77321	5.57501	2.78031	6.45615	5.85922	6.88166	0.137504	0.275007	0.176323	0.400538	4.03826	6.41414	4.19692	0.333424	6.47606	4.57652	0.831877	1.02857	2.58496	3.42492	1.91839	4.33842	2.56803	4.09677	6.24298	1.51096	2.47249	7.47994	1.53107	6.63546	2.73552	7.4138
ACH-000840	4.8495	0	7.01346	1.76553	3.63575	0.0285692	0.831877	5.33485	5.98687	3.96809	2.49825	3.51854	6.37434	2.54102	2.55582	0.124328	4.94017	5.14731	4.95884	3.09592	6.88704	7.59842	5.98687	1.65992	0.111031	0.275007	0.831877	5.59006	7.45549	3.91361	0.137504	7.02037	0.748461	3.49313	4.3505	3.85699	4.46923	2.33914	6.50779	2.11437	4.32625	6.06091	0.464668	1.80735	7.80935	2.9855	6.35368	3.39506	8.22347
ACH-001852	5.18468	0	7.38284	1.64616	2.39506	0	5.24298	5.65592	5.00135	4.19692	1.63227	3.51349	5.69125	2.16993	3.63575	0.0143553	3.6893	4.08661	4.43029	2.63227	5.779	5.84649	5.49921	4.1177	4.25626	0	0.344828	3.24945	7.11082	4.39438	1.12433	6.96116	0.0285692	1	2.58256	0.545968	2.82782	1.77821	4.59276	4.10769	3.63923	4.36317	0.176323	0.124328	7.76042	0.918386	6.5741	3.56438	6.69028
ACH-001528	3.64731	0	5.51349	2.5008	4.28244	0.333424	0	0	3.60763	3.9486	2.22959	3.7761	5.37678	0	0.790772	0	4.03034	6.43079	4.81865	3.21257	5.32445	4.58556	7.3966	0.0143553	0.0285692	0.0143553	2.59694	5.11853	5.67666	2.82171	0.0143553	7.22699	0.0703893	3.22959	0	2.58736	3.22342	1.90689	4.75328	0.0426443	4.17073	5.11936	0.584963	2.91073	6.27519	0.226509	6.09107	3.55704	7.44791
ACH-001656	0.124328	0	6.24222	2.05658	4.49313	0.0703893	4.7703	5.36142	4.43696	5.06824	1	2.7761	5.79883	2.06005	0.85599	0.201634	4.13586	6.05181	5.33878	3.65764	5.36107	6.04549	7.4099	0.0143553	0.807355	0.0426443	0	4.24717	5.23189	3.90785	0.367371	6.88765	3.67694	0	3.62527	0.201634	3.61471	2.49313	2.9222	3.64616	3.98277	6.62381	0.565597	0.0285692	5.85624	0.124328	5.13175	6.73403	8.10701
ACH-000016	4.89918	0	6.00293	2.05658	2.22959	0	7.05561	5.83769	6.02436	3.904	2.40599	3.37434	4.58075	2.25096	1.52607	0.475085	4.17951	4.17233	5.14568	3.25399	5.66221	4.97315	7.15836	3.1127	0	0.495695	2.61353	3.55459	6.9357	3.91934	0.0426443	6.2292	3.74524	3.06523	4.02059	4.23726	3.70044	3.67694	5.89288	7.54326	3.46989	6.46369	0.475085	3.26454	7.6851	0.632268	6.55964	4.75061	7.04887
ACH-000165	3.60051	0.0840643	5.80193	2.40871	3.5656	0	5.24945	6.03584	3.87676	4	3.57652	6.142	4.68257	1.32193	4.57168	0.0426443	5.05615	5.47768	4.73931	3.19219	6.05918	5.70155	9.44628	0.124328	0.0565835	1.78241	0	4.87823	8.71122	4.39985	0.0840643	6.48107	1.13093	0.650765	0.333424	1	4.30305	0.948601	5.42559	6.67299	3.70377	6.57061	0.739848	2.66448	7.13955	3.41954	6.23036	7.90557	6.91504
ACH-001460	6.03782	2.90304	7.2386	1.83188	2.85599	0.0703893	0.871844	5.45385	4.30451	3.37156	2.01436	3.15543	5.25361	2.34199	1.07724	4.89433	3.60999	6.9438	4.12763	3.07211	3.81147	5.6094	5.83036	1.79077	5.59723	0.367371	0	3.0268	6.48172	3.16993	6.03122	6.36177	1.58976	0.0143553	4.51854	2.5509	2.44626	2.70708	4.64789	3.46728	3.7137	4.7447	0.298658	1.23266	7.79474	1.53605	6.12412	1.54597	7.66647
ACH-000592	5.12226	0.0840643	5.77795	2.11103	3.46074	0.0976108	0.124328	6.04264	3.04614	3.70487	4.37016	5.68874	5.55213	0.0285692	1.44361	0.0703893	4.92647	6.40718	4.44758	3.11603	6.41363	6.33378	10.046	0.0143553	0.0143553	0.0565835	0.0143553	3.98003	5.7057	4.21878	0.176323	7.3403	3.63691	3.04963	0.344828	4.6792	4.13175	0.641546	6.33485	4.54411	3.62527	6.32966	0.422233	0.275007	7.26538	2.39506	6.34199	7.14374	7.7271
ACH-001192	5.67553	0	6.82807	2.6017	5.30706	0.0703893	1.67356	0.111031	4.56194	5.64731	0.15056	1.93734	6.06156	2.53605	3.86295	0.475085	4.76129	5.99729	6.28021	5.6014	4.42895	5.37086	8.81215	0	0.0703893	0.0840643	0.0143553	4.10852	6.09085	4.13504	2.6893	7.15036	4.5509	2.34483	1.69153	4.1643	4.62702	0.111031	4.44427	3.40871	4.19298	6.83529	1.4489	4.62761	6.76248	3.07724	5.9674	3.78241	7.86419
ACH-000045	0.0703893	0	5.90183	1.926	3.27202	3.73552	0.226509	5.06393	2.23266	4.33128	1.37295	2.48543	5.39712	0.0143553	1.01436	0.0426443	2.19849	4.76607	3.97453	3.28096	4.93357	5.37539	6.34625	0	0.226509	0.0285692	0.0285692	6.13525	5.69125	4.53792	0.782409	6.70874	0.632268	0.0565835	2.35896	2.89142	2.0635	2.13093	5.13545	0.0703893	3.59335	6.77466	0.505891	0.0143553	6.47476	0.485427	5.75649	6.56864	7.76015
ACH-000741	6.83504	0	6.93038	1.46989	3.22805	0.0840643	1.72247	7.0027	3.30159	4.98914	1.58496	2.80323	5.2817	3.74093	0.176323	0.0976108	4.5292	4.30012	4.30524	3.24945	5.40463	5.53294	8.26941	1.95233	0.356144	2.10434	0.124328	3.45943	7.09772	3.72137	0.0976108	6.93734	0.286881	0.0285692	4.87725	3.52105	2.98185	1.32769	6.36142	5.51885	4.33414	4.52607	1.62761	1.54597	7.5672	0.713696	5.19101	3.36597	6.09719
ACH-000912	3.75596	0	6.49506	2.40327	3.69488	0.189034	1.51096	5.54659	4.27798	3.81762	2.24489	3.61589	5.75302	2.39506	3.38128	0.0285692	4.69822	5.32265	5.06264	3.90304	5.84925	6.25115	6.63677	0	0.0840643	0.0703893	0.731183	4.94345	7.61596	4.08746	0.176323	7.23544	0.516015	1.848	4.55029	4.80839	4.25852	1.774	6.82426	7.04428	4.0781	5.60051	0.464668	0.15056	6.88606	2.93546	6.48559	7.02004	8.26871
ACH-000529	3.84699	0	6.29315	2.38957	3.21723	0.0565835	5.58045	6.34891	3.8268	4.16672	2.89918	5.75622	4.15704	1.92979	3.4019	0.137504	5.1811	5.03166	5.04308	2.79286	6.22246	5.65478	9.44298	1.45943	0.0840643	0.137504	0.632268	4.1102	7.87307	4.02237	0	6.26959	2.56316	0.992768	0.344828	1.23879	4.13011	0.226509	5.57682	6.42794	3.90785	6.52403	0.604071	0.0840643	6.95245	2.74631	5.87553	6.72955	6.87184
ACH-000508	5.48961	0	6.34323	2.66676	4.73606	0.0976108	0.111031	5.61677	6.35332	4.92552	4.49185	4.32048	5.8953	4.12184	1.51602	0.0143553	5.03474	5.87381	5.86666	4.45154	5.71644	4.88947	1.39506	1.07724	2.25096	0.389567	0.0143553	4.63285	4.91361	4.62527	8.13222	7.17921	0.238787	0.748461	7.20026	5.11686	4.60348	0.400538	5.56529	0.201634	3.80941	6.13873	3.76235	1.91073	8.26651	3.49185	5.0009	5.49185	8.51653
ACH-000577	5.91504	0	6.13525	1.9486	3.49697	0.163499	1.1177	7.25908	3.90497	4.89142	2.78241	3.42223	6.01235	0.137504	3.75061	1.29866	5.43663	5.60733	4.8268	2.38681	6.45138	5.26266	9.86132	0.176323	0.0840643	0.15056	2.88557	4.85997	7.0247	3.59574	1.05658	5.50398	0.925999	3.8748	0.0703893	4.60763	4.44228	1.26903	4.93876	7.71211	3.41954	5.24489	0.286881	1.41684	8.47237	1.69153	6.08108	6.28448	6.69167
ACH-000768	4.23189	0	6.26735	2.32769	4.66391	0.111031	2.04614	5.94345	3.9991	5.56102	3.854	5.1177	5.70736	1.75275	1.67356	0.0426443	4.49442	4.86938	4.58976	2.73118	6.88826	6.34181	8.71349	2.69153	0	0.0840643	1.09761	5.35579	8.14435	3.99458	0	6.1637	0.0143553	2.10098	1.91073	1.50589	4.28466	1.31615	5.46369	5.98322	3.15218	6.31161	0.757023	2.86196	7.07532	0.963474	6.46809	4.58616	7.76746
ACH-000636	3.36177	0	6.13935	3.11603	4.88899	0.678072	2.38681	0.275007	4.41616	5.36982	2.37295	4.01614	5.87995	2.80323	0.378512	0.344828	4.0917	2.98732	4.86146	4.48993	5.57773	5.62293	9.31924	0.0976108	0.0840643	0.0285692	0.0565835	5.4121	6.25248	3.75596	0.475085	6.90785	2.06695	0.0426443	2.64847	0.201634	3.41819	3.58856	6.41227	3.96532	3.87381	7.35306	0.956057	1.07724	7.64746	2.75916	6.03716	7.31161	7.54774
ACH-000667	4.22188	0	5.51223	1.79494	2.80941	0	1.45418	6.24355	5.41481	4.26078	2.09761	3.44493	4.56194	1.18903	4.28392	0.0565835	4.34908	5.17792	4.44824	2.55336	3.20006	4.8268	5.29902	0.475085	0	0.0565835	1.03562	4.13422	6.07168	3.70377	0	6.65191	0.0285692	2.35332	3.7666	2.96901	3.15866	1.11103	3.853	5.97361	3.38957	5.49633	0.687061	2.9782	5.89239	0.659925	5.56803	5.28244	7.49081
ACH-000905	5.86864	0	6.63604	2.04614	4.99639	0.176323	1.65535	6.20046	3.49825	3.97177	3.22651	3.93168	5.93357	2.23573	2.28096	0.0285692	4.63227	5.34554	4.28318	2.42492	6.56407	5.20163	8.19908	3.0993	0.0143553	0.555816	1.1635	5.14445	8.25219	5.40361	0.0565835	6.55336	1.57046	0.815575	2.13093	2.28688	3.69265	2.15381	5.29168	4.22342	3.43029	4.91265	1.45418	2.21412	7.97527	0.613532	6.74362	4.41075	7.9448
ACH-001494	5.53076	0	5.77004	2.30159	1.52607	0.0143553	5.41414	4.93499	4.99141	3.64616	2.54844	3.97177	3.51223	2.42223	1.70044	0.0143553	2.82782	6.34127	3.03386	1.09085	6.66761	4.34341	8.01992	4.37086	2.36457	0.594549	0	3.98094	8.07735	3.46597	0	6.21684	0	0	4.63575	3.54844	2.28688	2.38128	4.02768	5.82528	2.83794	4.71039	0.286881	0.879706	6.88215	1.75275	5.5549	4.24565	6.21237
ACH-000387	0.62293	0.0143553	6.38647	1.86394	3.82171	0.201634	6.0542	5.88679	5.31325	5.52732	2.41414	2.93923	5.7046	0.495695	0.863938	0.0285692	3.24793	5.25965	4.74792	3.48543	5.10266	6.01458	7.6335	0.0143553	0.704872	0.0840643	0	6.0197	6.06307	3.56438	0.378512	7.11155	0.0840643	0.0565835	3.52356	1.83996	3.52356	4.18587	6.0766	4.01078	5.12722	6.30743	0.613532	0	6.70238	0.594549	6.04832	5.56316	8.00832
ACH-002510	4.05224	0	6.29554	1.9222	2.36457	0	1.4957	6.33842	3.76871	4.21645	2.53107	3.68818	4.88801	0	0.575312	0	3.13914	5.50621	4.20006	2.86196	4.774	4.98823	7.29902	0.485427	0	0.0143553	0	6.64847	5.16148	3.66789	0	7.26003	0.536053	0.176323	2.01792	3.03914	3.75489	0.163499	4.02148	1.25096	4.16752	4.89142	0.722466	1.89142	7.26228	2.12102	5.9528	5.06091	7.83908
ACH-001303	4.10266	0	5.98664	2.28392	3.08236	0.0285692	0.0976108	2.62994	4.25776	4.07382	0.0143553	0.871844	4.93357	0	2.04963	0	3.0018	5.42021	4.0036	2.11437	4.65592	5.51948	1.07039	0.432959	0	0	0	3.28392	4.15543	3.80735	0.356144	5.35826	5.96947	0.0143553	6.72874	5.13052	3.07895	0.0143553	1.35614	0.163499	3.79077	5.11145	2.55582	2.9241	7.40718	4.25096	5.27575	3.52105	6.47913
ACH-000026	4.55336	0	5.8301	1.8679	3.58135	0	0.0840643	5.01436	4.44758	3.91934	2.45943	3.14241	6.61279	2.20477	1.52105	0.226509	4.38474	1.7866	5.29205	4.57531	5.52951	5.1807	5.18864	2.62059	0.0565835	0.111031	0.0143553	3.97269	6.64386	4.08576	0.0840643	6.43079	2.95791	3.43829	2.41143	2.91073	3.51728	2.31904	7.10999	6.29701	3.74524	5.5373	0.389567	0.0143553	8.01156	0.963474	6.53869	4.11103	7.51728
ACH-000838	0.275007	0	6.5168	2.76765	4.23266	3.81762	0.238787	5.03518	3.7845	3.72683	1.90304	4.62293	5.97659	2.81967	0.214125	0.0703893	3.13914	5.31687	4.0018	3	4.62469	5.91241	3.88655	0.0285692	0.367371	0.0976108	0.0143553	5.45746	5.35509	3.71149	0.0976108	7.3285	0.0426443	0.0703893	4.05485	1.39506	3.72574	5.01078	5.84925	0.356144	3.6017	6.20418	0.495695	0.0426443	6.72274	3.17473	6.37695	1.59455	7.5127
ACH-001172	5.3906	0.0143553	6.86344	2.60407	4.28021	0.526069	0.0143553	6.55674	5.39746	4.26978	2.58736	4.01167	5.83744	4.15947	3.45943	0.0143553	5.01167	5.49121	5.32876	3.15543	4.56803	6.03254	6.86258	0.0976108	0.773996	0.765535	2.91839	3.93734	6.60466	4.40463	0.584963	7.47865	3.67356	2.26003	1.82375	3.52732	3.51728	2.51349	4.31179	5.0635	4.43563	6.26791	0.31034	0.887525	7.41422	2.71589	6.90316	5.84474	7.97097
ACH-000822	4.39917	0	5.78921	2.1177	3.38267	0.0840643	3.07211	6.00518	3.6893	4.47379	3.28392	6.02547	4.8953	2.14405	0.163499	0.31034	4.76075	5.99729	5.27538	3.13258	5.99865	5.64933	9.72581	0.536053	0.298658	0.389567	0.0285692	5.38853	6.75275	3.98094	0.0565835	6.40293	2.10098	0.189034	3.69599	3.59335	4.20085	0.526069	4.40122	5.51254	3.57289	5.32912	0.464668	0.790772	7.71507	3.55213	6.00944	5.12681	7.64573
ACH-000531	4.52482	0	5.59694	2.08746	1.84398	0.0565835	5.69961	6.16591	4.8166	3.26303	2.9982	5.88777	4.17632	2.16672	1.75702	0.31034	4.36317	5.0197	3.99548	2.64847	6.00585	5.54195	8.31293	0.0840643	0.0285692	0.516015	1.68257	3.67807	7.96936	3.90207	0.565597	5.86962	0.176323	0.879706	0.201634	1.88362	4.11936	1.61353	5.45352	6.00921	3.18587	5.71342	0.378512	0.773996	6.78162	2.15056	5.82579	5.93286	6.81417
ACH-000349	4.69822	0	7.34882	3.48414	3.91456	0.0426443	0.0426443	5.93357	4.78346	4.774	2.23573	2.95977	5.32337	2.74416	5.41109	2.51854	5.09635	5.84549	5.92481	3.96993	6.76434	4.904	7.3936	0.0143553	0.137504	0.0285692	0	3.19535	5.76022	4.55704	0.137504	6.9535	3.5008	0.516015	6.40344	5.69627	3.48156	0.0426443	3.49697	3.0036	3.14893	6.17153	2.21412	4.75221	8.59425	2.75275	6.58481	4.5656	8.01296
ACH-000527	6.08895	0	5.62498	2.06695	2.85798	0.0426443	0.111031	6.01636	3.86096	4.41886	3.18745	4.05745	5.03474	2.91265	1.8679	3.35755	3.68482	5.38405	3.8679	3.93168	5.30634	4.8679	2.488	2.53107	4.45681	0	0.495695	4.14078	6.8268	3.96993	0.226509	6.31994	4.89869	0.201634	5.41143	4.337	3.66221	0.956057	4.83188	0.584963	3.6311	5.24869	0.201634	1.85599	6.55582	2.18903	6.57999	6.72629	7.10873
ACH-000279	5.24565	0.321928	6.2521	2.45154	4.67016	0.0143553	3.72465	0.333424	3.79805	5.53356	2.5509	2.30451	6.05658	0.863938	3.86987	0.0703893	3.85699	5.99254	4.76977	3.98368	6.27594	6.06415	10.3693	0	0.0703893	0.0703893	0	4.30597	5.70625	4.06264	3.5373	6.78777	4.45352	1.30451	0.0703893	5.46826	4.50526	0.0840643	4.54597	3.32337	4.16027	6.08916	0.782409	1.73552	7.21432	2.85997	5.95257	3.18903	7.72267
ACH-000516	4.86146	0	6.62834	2.24793	3.90304	0.111031	6.3427	5.41109	5.26191	4.21179	3.43962	6.08364	5.7761	2.79909	1.1375	0.0840643	4.73335	5.89458	4.67073	3.95606	6.9514	6.67539	8.65914	0.773996	0.111031	0	2.43829	4.67525	7.28457	4.4957	0.163499	6.78175	4.36807	1.52607	1.66903	2.26903	3.5741	0.411426	4.83542	5.54751	3.98459	5.96347	0.895303	1.16993	7.32148	3	6.51112	4.6605	8.12428
ACH-000812	4.78816	0.0285692	6.82349	2.59694	4.04701	0.0285692	0.632268	6.27296	4.09677	3.94298	3.66448	3.1635	5.30889	0.226509	0.31034	0.933573	5.42727	6.87492	5.58767	3.5008	6.06975	6.77597	9.41024	0.422233	0.0426443	0.137504	0.226509	6.77004	5.47476	4.25852	0.176323	7.28068	1.48543	0.910733	3.12598	2.59932	4.63459	2.43296	4.7148	0.565597	3.82069	6.42105	2.01792	4.48027	7.18616	3.54844	5.88728	1.47508	7.77821
ACH-001300	3.92029	0	5.99458	2.18269	3.82171	0	0.0285692	3.69488	3.97453	4.65935	2.50843	2.62059	4.63052	0.263034	3.53978	0.111031	3.83895	5.99005	5.3875	3.31034	4.70266	4.94017	6.27352	0.713696	0.0565835	0.298658	0	3.7126	5.24375	4.24184	0.722466	5.72192	7.03056	0.475085	8.14435	4.58316	3.89918	0.0703893	2.0072	0.0565835	3.42895	5.75141	2.7137	1.61824	7.73789	4.96855	6.40105	4.36667	7.49474
ACH-000524	4.69321	0.189034	6.84862	2.64155	3.55704	0.111031	2.44626	5.17473	3.28983	4.55336	3.22342	4.76129	4.32193	1.78241	4.66619	1.10434	4.29939	4.43496	5.09212	3.17951	6.05767	5.51349	5.43229	0	0.0426443	0.0565835	0.0426443	3.58135	6.52966	3.02503	0	5.85674	2.26303	0.62293	2.76977	3.58015	4.0063	0.879706	4.63691	0.970854	3.93074	6.06587	0.378512	1.45418	7.46172	0.739848	4.62819	6.5404	8.03414
ACH-000611	0.201634	0	5.96532	2.85997	4.99186	0.111031	0.263034	0.765535	5.10559	5.34908	2.41954	3.82273	5.63865	4.42089	0.238787	0.0703893	5.16471	6.52826	6.04636	3.69377	5.12763	6.01279	1.57046	0.0840643	0.0840643	0.411426	0.0143553	4.69822	6.34305	4.62819	0.0703893	5.40293	0.0840643	0.0426443	1.71809	0.0565835	2.38128	0.0976108	2.33342	0.545968	4.48929	7.22448	0.201634	0.0285692	6.77004	2.10434	6.08704	0.475085	8.0398
ACH-000411	3.40599	0	6.29444	2.30451	4.17792	0	1.72247	6.44377	4.61824	4.08576	0.713696	1.5509	5.73471	1.31615	2.87971	0.238787	4.32481	5.00135	4.38059	2.77189	5.70543	6.47151	7.1267	0.978196	0.0976108	0.0143553	0	3.79494	7.38543	3.86888	0	6.88996	0.748461	0.0426443	2.02148	4.91982	3.7148	2.32481	6.48236	5.07895	3.64039	5.14445	0.757023	0.275007	7.13134	0.432959	6.52121	4.38957	8.24179
ACH-000718	5.51254	0	5.72274	1.87971	3.57894	0.0143553	3.94579	6.26585	5.03386	4.43962	3.45286	5.60199	5.56834	1.774	0.411426	0.367371	5.33842	6.13914	5.0321	3.80941	4.37573	5.91097	6.69181	3.81967	0.124328	0.163499	0.0143553	4.42089	7.1635	3.61353	0.124328	7.48406	2.84197	1.39506	5.53854	5.02503	3.2765	3.09761	6.68159	5.99095	3.31179	6.52513	0.613532	0.333424	8.17123	2.08746	6.33056	4.09592	7.56948
ACH-000903	4.36107	0.275007	5.95257	1.5656	3.55582	0.0840643	3.6565	6.9148	3.93263	3.79077	3.22497	4.07553	6.03738	0.613532	6.79973	0.189034	5.24755	5.60822	5.03914	2.48543	6.25795	5.84574	7.07724	0.0976108	0.238787	2.74201	1.10434	4.85599	6.86851	4.13422	0.85599	6.47135	3.96625	0.411426	0.871844	2.45154	3.51475	1.67356	4.1635	4.85997	3.33628	5.14119	0.250962	0.250962	8.69241	3.46728	7.05126	3.81865	8.05864
ACH-002021	5.01703	0	6.93404	2.93734	4.05311	0	0	6.07253	4.52857	3.66676	3.65764	3.24945	5.62877	1.95977	0.695994	0	4.15462	4.64443	5.14364	4.07382	3.97453	5.27538	6.51901	0.0565835	0	0.0143553	1.04264	4.32769	5.5552	4.66959	0	6.86307	0.263034	0.895303	4.71918	3.79701	3.58736	1.47508	3.91265	2.37851	3.62877	5.33128	1.80735	7.54674	6.94028	2.17313	6.4707	5.13504	8.00551
ACH-000433	4.35473	0	6.60777	2.15704	3.09761	0	4.05832	5.59544	4.26454	3.02503	2.06695	2.79494	5.08916	1.72683	1.52607	0.201634	3.50335	3.852	3.64731	2.31034	6.35984	6.17752	6.90412	1.69599	0.0565835	0.0426443	1.93357	3.47379	6.68664	3.91073	0	6.0018	2.25399	0.0285692	3.7866	3.46074	2.95233	3.02857	6.48301	8.36558	3.69042	5.20516	1.05658	1.73118	7.91845	0.62293	6.11499	3.92979	7.5373
ACH-000499	5.11562	0.356144	6.42425	1.93357	4.02148	0.0285692	3.52857	0.238787	4.44956	4.66278	2.19535	2.46989	5.44095	0.400538	1.93357	0.536053	3.94486	5.49442	5.02768	3.97545	6.24963	5.49121	10.2963	0	0.15056	0.0703893	0.0143553	4.19535	5.4793	3.78241	3.88362	6.37608	2.87381	2.02148	0.333424	3.82883	3.67694	1.22651	3.91361	2.8953	4.03562	5.68818	0.389567	2.88947	7.43829	3.01257	6.00248	5.4489	8.14507
ACH-000278	3.9644	0.0426443	6.13525	1.8679	2.67807	0	5.8339	4.96901	4.50016	4.39232	2.71589	3.85	5.3194	3.14893	5.45549	0.263034	3.9607	4.94439	4.27575	3.08746	6.31651	6.20457	6.73363	0.584963	0.722466	0.0703893	1.11103	3.84699	6.8835	4.33771	0.238787	6.33682	3.926	2.80735	3.63459	2.1375	3.42626	2.23573	4.80684	1.65076	3.28392	5.96763	0.389567	0.545968	7.48921	1.81967	5.35579	5.53169	7.87676
ACH-000202	5.69014	0.565597	6.05268	2.13422	3.15704	0.0565835	0.0565835	3.5097	4.18507	4.28466	3.08406	4.22188	6.5575	1.85997	1.21412	0.0976108	2.81558	5.58496	4.20477	3.76341	5.26115	5.85873	7.93375	1.65992	0.0565835	0.356144	0	3.62877	4.95233	3.67243	0.111031	6.38128	5.13668	2.43563	3.62644	5.31542	2.68482	1.72683	3.93546	3.32481	5.0036	5.68874	0.189034	4.06264	7.30916	2.65535	6.1058	2.74846	8.1025
ACH-001736	0.0426443	0	5.61383	1.8679	3.1811	0.0565835	0	0.124328	3.92695	4.45878	0.111031	3.03034	5.24907	0	2.96162	0.0143553	3.57652	2.95791	3.9644	3.10936	5.28096	4.81865	7.9693	0.0426443	0	0	0.0143553	5.04177	5.95513	3.57046	0	6.03628	4.72028	0	0	0.485427	2.24489	2.29278	3.37156	0	3.66107	6.41549	0.604071	0	6.89276	1.43829	5.22843	7.30697	6.77965
ACH-001379	4.3427	0	5.81429	2.79077	3.76977	0.0143553	5.2891	5.31288	5.61559	3.97911	4.14486	4.74953	3.7866	0.298658	4.23802	0	5.29829	6.87197	4.92742	3.64731	4.97269	4.39506	6.28633	3.58015	0.0285692	0.526069	0.15056	3.4489	6.63125	3.33342	0.0285692	7.52403	0	0.275007	5.74927	3.90497	4.04264	2.56316	5.78424	7.38007	3.6017	5.22226	0.400538	1.68257	7.40037	0.669027	5.57107	2.92979	7.96388
ACH-000128	5.36142	0.111031	6.09149	3.04089	4.87627	0.0143553	0.0976108	5.10685	3.52857	4.47119	2.48285	5.60199	5.1152	0.0285692	0.790772	0.0143553	3.88947	5.65735	4.15785	3.84197	5.84122	5.16189	8.34727	1.30451	0.0426443	0.0143553	4.1375	3.81147	6.39951	4.90689	0	7.05213	3.51349	1.72247	1.01436	4.50843	4.36807	0.176323	4.31687	0.378512	4.51412	6.80181	0.526069	0.0565835	6.61956	3.88166	6.45022	6.27501	7.60073
ACH-000696	4.0365	0	6.74349	1.53605	3.43296	0.0285692	0.0976108	5.76075	4.49057	3.85599	3.36597	4.09761	5.41515	3.08916	2.58015	0.0840643	4.02591	5.09297	4.08916	3.03386	7.07564	5.22651	6.76845	0	0.0565835	0.0143553	1.20163	5.28651	7.02414	4.15218	0.0840643	6.60214	1.20789	1.96717	3.0197	4.63865	3.64962	1.15056	5.58856	0.925999	3.51349	6.50398	1.11103	2.51854	6.08683	0.526069	5.69711	5.11353	7.93156
ACH-000041	5.38059	0	6.43779	3.10601	4.48993	0.594549	4.24184	0.411426	4.68313	5.86765	3.01792	3.02326	6.01792	1.31034	4.5472	0.189034	4.41278	5.44328	5.05702	4.46009	6.34944	5.54164	10.9367	0.0840643	0.0565835	0.0285692	0.0143553	5.08661	6.48832	3.99729	2.52857	6.93746	3.60999	2.44626	1.36177	5.42324	4.98368	0.189034	5.07895	3.71039	3.99277	6.58826	1.45418	4.0321	7.35191	3.61353	6.16491	4.68201	8.1575
ACH-000214	4.07296	0	6.08385	2.21412	2.49825	0.0565835	5.14975	7.35606	5.10518	3.82579	2.9782	6.45878	4.51412	2.75489	1.31034	1.5656	4.05832	4.67469	4.72683	3.22342	6.20163	6.3512	10.4302	4.30961	0.0703893	0.765535	2.28983	3.83289	7.51191	3.83693	10.4495	6.47362	0.0840643	4.35685	0.0143553	3.68594	3.77716	1.56071	5.5741	7.58346	3.55213	6.67186	0.495695	0.0426443	6.91588	3.56803	6.08513	6.20633	6.97522
ACH-000747	3.58856	0	6.23668	2.96717	4.20398	0	0.298658	6.51995	4.71809	3.94298	2.52356	2.63459	6.56636	2.74846	4.83289	0	5.0648	5.26828	5.02636	4.26604	6.21645	6.0691	6.71287	0	0.0285692	0.137504	0.0143553	4.93121	7.74396	3.80219	0.0703893	7.89567	0.124328	0.226509	3.63459	5.08576	4.15462	0.0703893	4.63807	6.5097	4.89821	6.53216	0.238787	0.536053	7.63612	1.18903	6.69683	4.01078	7.262
ACH-001307	4.71149	0	6.94251	1.84398	3.70487	0	0.495695	5.81941	3.7366	4.17792	2.73769	4.53667	6.29719	2.12763	5.18388	0.0285692	3.99005	4.0197	4.58316	2.93546	7.10811	5.68622	8.52505	1.45943	0	0.0976108	0.0143553	5.22381	7.8874	4.05572	0.0285692	6.55121	0.432959	0.250962	0.790772	2.80323	3.56438	1.14405	6.1299	7.93782	3.25248	6.50335	0.505891	1.90689	6.43646	3.42358	6.30834	4.8089	8.34758
ACH-000341	0.505891	0.0285692	6.80271	2.80941	4.42626	0.0703893	0.111031	5.56194	4.35826	5.39472	2.91648	3.45943	5.58436	2.46728	0.782409	0	5.37226	6.22593	5.18388	4.80632	6.61809	6.17313	1.60407	0.0285692	0.201634	0.111031	0.0703893	4.57592	5.53761	6.36632	5.64155	8.08693	7.09466	0.137504	6.43296	5.27836	4.92884	0.454176	3.77716	1.38405	4.95187	6.91803	4.04701	6.73552	7.38982	5.24489	6.47768	4.87529	7.69606
ACH-001740	4.15056	0.0976108	7.29618	2.64155	4.67864	0.0565835	1.43829	0.111031	2.03562	5.48736	1.13093	0.555816	4.50208	0.0285692	2.5008	0	3.51602	5.28873	4.93452	3.41414	4.89336	5.59783	7.16159	0	0	0	0	4.09424	4.69153	4.52857	0	6.57682	4.03474	2.08406	1.32193	6.2878	3.7761	0.250962	4.17871	0.263034	4.40871	5.88753	3.24793	2.80116	7.20349	3.01257	6.61692	4.0635	7.58218
ACH-000417	4.84046	0	6.4957	2.22959	3.8748	0	2.96532	6.35209	5.28836	4.43763	2.88753	3.21101	5.00045	3.56071	2.88362	0.411426	4.39438	5.18587	4.41886	4.20006	6.17632	6.38526	6.88947	4.92695	0.226509	0.201634	0	4.71039	8.10669	4.41819	0	7.85312	0	0.31034	5.33235	4.29205	4.33985	2.61117	5.51381	6.48123	3.95699	6.76208	0.286881	0.948601	7.09001	2.60644	6.02879	2.45943	7.48107
ACH-000120	4.92505	0	6.10622	3.52105	4.55213	0	3.71918	5.05311	5	5.46172	2.15704	2.93357	5.7046	1.63227	4.31615	0.0285692	4.56925	4.87234	5.15987	3.81762	5.39849	5.76447	8.80471	0.0285692	0.214125	0.0426443	1.42761	3.82883	7.6985	4.51854	0.678072	6.49362	6.02614	0.137504	2.79909	3.57773	4.47314	0.137504	3.63575	5.68734	4.21412	6.92564	0.918386	4.13832	6.88179	3.90014	6.02392	5.84071	6.60006
ACH-001694	5.68173	0	7.2078	2.57531	2.10769	0.0143553	0	5.77373	5.91169	4.15462	2.93546	5.72629	4.01078	0	4.92172	0	4.08406	3.29572	4.30524	2.4489	5.42727	4.59515	4.07553	2.52356	3.01257	0.356144	0	3.27202	7.26782	4.86245	0.0976108	6.42928	2.58976	2.40054	0	1.48027	3.18428	4.40122	5.63865	5.35332	2.95233	5.6893	0.545968	0.111031	6.96266	0.992768	5.34412	2.17951	6.51238
ACH-001542	3.89821	0	7.29591	1.60881	3.24184	0	4.49249	5.02945	4.43496	2.28392	1.96347	2.9222	4.47249	0	2.98914	0.0285692	2.97085	4.59932	3.67129	1.76977	4.91934	4.60466	5.42962	0.604071	1.65076	0.584963	3.08236	3.53605	5.34518	2.54102	0.111031	5.55735	1.36177	1.61824	1.07039	1.41684	2.63923	1.22033	3.31179	4.80529	2.62293	3.51349	0.176323	0.782409	7.475	0.201634	5.41007	2.82985	6.68089
ACH-002509	5.54813	0.344828	6.13217	3.24945	4.15623	0	1.98185	5.84474	3.47119	4.62234	2.66903	4.849	4.81967	3.93074	3.61235	0	3.8339	4.44626	4.95606	2.75275	5.57289	5.43095	7.12236	0.669027	0.545968	0.201634	0.948601	4.14078	6.33163	3.56316	2.23266	7.63844	3.86987	0.201634	3.02857	4.18824	4.08236	0.356144	3.71589	2.5509	4.18269	5.83415	0.903038	0.0976108	7.4872	3.26003	6.58301	6.67059	7.31316
ACH-000438	3.97911	0.0285692	6.09487	2.27202	4.11103	0	5.95838	6.98265	5.30561	5.15137	1.5509	3.6837	5.36807	0.0143553	5.00764	0	4.43962	6.34038	5.02768	3.51223	4.21645	6.01659	7.20897	1.54597	0.0565835	0.137504	0.0976108	5.49057	6.43196	3.43429	0.0565835	6.32661	0.0976108	0.0285692	0.0976108	4.72683	3.35473	2.33914	4.51033	4.9991	3.72356	6.62147	0.454176	3.69265	7.4002	1.33914	7.15157	5.39951	8.1532
ACH-001366	4.35544	0	6.34021	2.88362	3.85898	0.0143553	0.495695	0.0143553	4.38888	4.26828	0.0143553	0.687061	5.47541	0	2.98368	0	3.27798	5.05745	4.77926	2.83996	4.24184	5.2817	0.0703893	0.238787	0.0143553	0.0703893	1.18269	3.28688	5.23879	4.01614	0.124328	5.57501	4.96301	0.137504	7.24165	3.49953	3.16511	1.1635	0.0285692	1.50589	4.38474	4.61176	1.32193	3.21257	7.02403	3.80323	5.34625	5.73525	7.1207
ACH-000532	4.64097	0	6.63575	2.9486	3.76129	0.0565835	2.43563	6.46041	5.09424	4.02148	2.60407	3.58015	5.81609	1.75275	2.25096	3.62644	3.65076	6.51223	4.33628	2.91073	5.24869	5.73552	5.01659	1.17632	3.36177	0.0565835	0.0565835	3.8679	7.47784	3.90207	1.0072	6.42089	0.0703893	0.111031	5.21994	3.64155	2.94298	2.61824	4.98048	3.12928	3.36597	5.24184	0.0565835	0.641546	7.72629	2.58976	6.40531	1.98914	7.79416
ACH-000653	0.124328	0	6.08364	3.07724	4.34979	0.0840643	3.08066	5.1823	4.51665	4.46401	1.73118	4.75382	5.1635	1.15704	0.176323	0.0565835	4.08066	4.92505	4.59574	3.58135	4.82375	5.61176	0.933573	0.695994	0.0143553	1	0.526069	4.93121	6.43346	3.70155	0	6.05376	0.545968	0.0840643	5.45385	0.799087	2.7761	4.17632	5.21607	1.81967	3.80735	6.83276	0.584963	3.78136	6.62	3	6.38076	6.01614	7.95245
ACH-000839	4.50208	0	5.75462	1.73985	3.49825	0.0703893	4.52982	5.98277	4.02414	3.45286	2.16027	3.63691	3.89433	0.0143553	2.488	0	3.56682	5.38922	3.94298	2.65992	5.83365	5.73281	6.12267	2.19219	0.201634	0.678072	1.21412	3.96532	5.88972	2.87578	0.0565835	6.54705	3.19849	1.83592	0.641546	0.389567	3.28392	1.7866	3.85	2.35332	2.86394	4.60348	0.226509	0.275007	6.76514	0.238787	5.17832	1.87578	6.77162
ACH-000673	4.71039	0	6.75876	2.06005	3.55582	0	4.23879	4.40871	3.43962	4.06953	3.94767	5.84046	5.67016	0.0285692	3.92979	1.24489	5.58195	6.18706	6.32409	3.97269	6.52309	5.53761	8.32903	2.99639	0	0.0703893	0.956057	4.18745	6.61338	4.23266	0	7.23026	2.07039	4.48671	0.0285692	0.85599	3.72247	0.15056	4.78816	4.17233	3.70487	6.88484	0.687061	0.0285692	6.45319	3.33342	6.14241	5.47994	7.88075
ACH-001524	6.44427	0	7.34952	2.89918	1.87184	0.0426443	1.36737	4.69599	4.21101	4.04789	2.5656	4.89336	4.05572	0	3.72028	0.0143553	4.32409	3.25701	5.0072	3.59574	6.0387	5.37469	8.1375	1.20163	3.39506	0.0426443	0.0426443	2.71589	8.03315	4.05572	0.0840643	7.10476	2.01436	0.613532	0.189034	2.46467	3.57046	3.55213	4.70377	5.94181	2.95233	5.13955	0.176323	0.124328	8.0908	1.30451	5.53574	4.99955	7.06026
ACH-000069	1.35614	0	6.11353	2.66221	4.47832	6.70777	1.15056	4.1035	4.28244	4.5552	2.69599	3.49057	5.92884	2.88557	0.226509	0.0143553	4.37226	5.53107	4.94767	3.76341	5.1807	7.11707	6.42995	0.298658	0.0285692	0.15056	0.0703893	5.29536	6.55244	5.92101	0.565597	6.80426	2.64386	0.0703893	1.26903	5.78607	3.17632	1.16993	6.74416	0.536053	4.46009	7.31089	0.650765	0.263034	7.13217	2.59694	6.51602	1.61353	8.20526
ACH-000323	4.57471	0	6.63241	1.93734	3.4019	0.0285692	0.575312	5.77558	3.32048	4.0054	3.57773	5.33414	4.90689	1.85599	0.62293	0.0143553	5.53978	5.55949	5.73769	2.78869	6.14282	5.99661	7.44361	0.189034	0.0840643	0.0285692	2.0321	6.60866	7.78862	4.12019	0	6.28817	0.226509	3.24793	0.275007	0.992768	4.63517	0.367371	3.32048	5.6946	3.22651	6.82985	0.298658	0.713696	6.53247	2.34767	5.40769	4.97315	8.18373
ACH-000021	4.83137	0	6.49857	2.41414	4.52795	0	2.15381	6.05072	4.45286	4.24336	3.10266	4.68313	3.8268	4.72137	0.526069	0.0143553	4.08321	4.98868	4.8089	3.15218	5.89336	6.41684	5.75248	0.475085	0.0426443	0.0976108	0.0976108	4.06264	7.03122	4.66619	0.124328	6.25323	1.72683	1.13093	5.20203	3.09592	4.09001	0.111031	6.23917	4.92125	4.3875	5.75248	1.18903	1.51602	7.20271	0.495695	5.27724	2.70266	8.33226
ACH-001863	5.28096	0	6.77992	2.45418	3.6565	0	2.21101	6.09571	4.58616	3.83794	2.9542	3.0036	5.09424	2.92029	3.04439	0.286881	4.34199	7.22786	4.97911	3.51728	5.59932	5.41244	7.7828	1.99639	0.263034	0.124328	0.422233	4.42828	9.28762	4.26003	0.536053	6.7494	0.0840643	2.55336	6.30469	4.94579	3.59455	2.45154	6.58165	6.50478	4.22805	4.9331	0.604071	4.26978	7.95739	2.07382	6.38888	4.79597	7.35006
ACH-000980	5.16591	0	6.1813	2.45418	4.52231	0.0565835	0.0976108	6.19771	4.70377	5.61883	3.03914	3.29425	6.87123	3.34625	2.1177	0.0703893	4.73498	5.2075	5.02989	3.96347	6.97315	6.26997	5.95931	0.163499	0.250962	0.613532	0.275007	4.852	5.18943	4.69098	1.25701	6.78555	2.88947	1.1635	4.80529	6.00473	4.6311	0.15056	4.32625	1.15704	4.03034	6.58165	4.10685	4.10936	8.08815	5.41414	6.60999	7.04996	7.9814
ACH-000106	0	0.0285692	5.70321	2.69822	2.77821	8.02253	0.0976108	4.98959	3.69265	4.11853	0.823749	3.31179	5.1014	2.82985	0.31034	1.58496	4.26153	5.79701	4.83036	3.0321	5.41177	6.95594	6.80426	0.214125	2.09761	0.275007	0.0426443	5.63169	6.6175	6.04941	1.94486	6.91994	1.05658	0.0285692	3.8339	1.23879	3.25399	3.0036	8.48402	1.66903	3.69822	6.71273	0.31034	0.0285692	7.0993	3.49697	6.0237	0.83996	7.87357
ACH-000734	5.06091	0	6.6388	2.54844	3.82782	0.0703893	4.59932	6.70487	6.50414	4.80787	1.5008	2.926	5.29352	2.06005	0.910733	2.29278	3.81455	5.73145	4.32337	3.33342	5.05224	5.50557	7.43037	0.0143553	0.910733	0.0285692	3.7939	4.47249	7.16972	3.73335	6.12908	6.4949	2.09085	2.52356	4.30524	4.17073	3.79701	2.14405	4.47444	5.19967	4.25399	6.22149	0.83996	4.65707	6.6314	0.454176	6.24108	5.19535	7.46728
ACH-000845	4.02237	0	5.23534	2.65306	3.68257	0.0285692	2.40054	5.83668	9.59759	4.90545	2.25399	3.97085	6.26791	0.286881	1.49057	0.0565835	5.23113	5.12226	4.81096	3.06523	5.45253	5.91073	5.98732	2.54102	2.28096	0.189034	1.76977	3.95791	7.35597	3.87086	0.669027	5.97085	0.0565835	1.52105	3.26754	3.30159	3.52857	2.53605	5.3067	4.69544	4.38612	6.43513	0.400538	0.659925	6.78673	1.9222	5.84423	6.46156	8.17408
ACH-000730	4.58676	0	6.50064	1.70487	3.81762	0.0285692	0.485427	5.09128	4.32193	3.62527	2.25096	3.5373	5.54998	0.485427	1.40054	1.15704	4.28614	5.65764	5.37886	3.12928	4.28688	5.72301	7.6858	0.321928	0.124328	0.0285692	0.189034	6.40769	4.97774	4.02326	0.0285692	7.69509	1.27501	2.50335	0.879706	4.69098	4.04701	1.39506	4.37086	2.97636	3.91743	5.96993	0.367371	2.21412	7.26031	1.65076	6.22554	4.68594	7.97522
ACH-001334	5.34518	0	6.83302	1.68257	2.88362	0.0703893	2.88557	6.03694	4.64731	4.0018	3.33342	4.58916	4.39849	2.9241	6.0398	0.0143553	4.18031	6.09318	4.3067	2.52857	4.6565	4.68706	8.06975	1.05658	3.66448	0.0143553	0	2.57773	6.4082	3.62994	0.632268	5.91241	2.63459	1.56071	4.67243	4.29352	3.40871	3.60644	6.96982	5.14608	3.29572	5.66931	0.214125	1.45943	6.99379	1.95606	5.37191	2.27501	7.21587
ACH-000698	4.66789	0	6.11624	2.90111	4.41414	0	0.201634	6.26997	6.18982	5.03254	3.51475	5.34447	5.77215	5.43263	5.61794	0.687061	5.31976	6.97315	5.96993	4.72901	5.4591	6.75982	6.32876	2.62527	0.124328	2.7866	2.61117	3.6241	5.87061	5.52388	4.87774	7.95198	1.29278	1.02148	6.75128	4.48091	5.51538	0.0976108	5.07468	6.93617	3.5509	5.34944	3.78346	3.94017	8.05734	4.15462	5.5601	6.1373	7.8242
ACH-000802	4.51791	0	6.29866	2.70929	3.27352	0.163499	3.02326	5.55674	4.64443	4.01346	2.78031	3.89045	5.01346	2.49825	5.07039	0	4.36247	6.0054	4.67186	2.81558	5.38474	6.27352	6.66235	2.15381	0.137504	1.64616	0.0285692	3.94298	6.39678	4.1035	0	6.6327	2.67807	2.50335	3.10769	3.84499	3.58135	1.72247	5.49442	4.62117	3.52982	5.26791	0.545968	1.87184	7.42735	1.47508	6.58015	4.72247	7.15916
ACH-001836	6.00944	0	6.75034	2.43029	4.26604	0.137504	5.87209	6.1035	4.61883	3.61117	2.61117	4.31179	5.50748	4.17632	1.84398	0.485427	6.15826	6.93298	5.47897	2.86394	5.58767	7.21994	7.32499	3.23726	1.37851	0.124328	0.678072	3.63923	7.75141	5.05268	0.124328	7.15046	0.536053	1.38957	5.0036	4.11437	4.28318	3.09085	7.76055	8.36746	3.55336	4.86641	0.963474	0.722466	7.17592	3.50462	6.69933	3.30305	6.90087
ACH-000573	3.45549	0	6.27053	2.91839	4.5601	1.16993	0.214125	6.3087	4.82324	4.09339	2.76977	2.1375	6.00944	2.24793	3.51096	0.15056	4.40395	5.39163	4.774	4.81096	5.82426	6.83302	6.77162	0.201634	0.0143553	0.226509	2.29278	6.30925	6.32337	3.12433	1.05658	7.70901	1.91456	4.71644	4.04177	2.95791	4.41886	1.63227	4.91121	1.48543	4.0505	6.26191	0.669027	2.66676	6.9644	0.925999	5.87799	4.63575	8.66438
ACH-001699	5.35473	0	6.50176	1.48027	3.59694	0.201634	3.30305	5.92125	3.71149	2.79909	1.94111	3.59574	4.62527	0	3.7126	1.1635	3.23726	4.749	3.83086	1.54102	5.55643	3.75702	6.42442	1.4489	1.66448	0.536053	0.378512	3.37156	6.51049	3.53605	0.0426443	6.53247	3.32769	0.978196	0.189034	2.10769	2.76765	2.49313	3.94298	2.14078	2.45943	4.06091	0.214125	0.226509	7.55013	0.871844	4.65707	2.77189	6.67002
ACH-000963	5.09212	0.356144	6.87147	2.7137	3.97177	0.124328	0.0840643	6.8166	5.92315	4.0027	2.16027	2.854	5.60526	2.7845	0.941106	6.1819	4.11603	7.85524	4.72738	4.42559	4.26153	5.86245	6.61603	0.722466	3.9222	0	0	4.46793	7.18735	3.71699	3.5509	6.86505	0.189034	0.0565835	5.67101	1.50589	4.22419	0.584963	3.80529	0.214125	3.83491	6.35368	0.526069	0.0565835	7.32688	3.2555	6.31994	4.23879	7.62176
ACH-001567	3.43162	0	6.7343	2.49057	4.0072	0.0143553	0.250962	5.98299	3.22805	3.56925	2.59932	4.21257	4.54782	0.632268	0.356144	0.0426443	4.10852	4.16752	5.11603	2.26604	4.81301	4.8495	8.70563	0.411426	0	0.0285692	0	3.36457	6.3203	3.28836	0.0565835	5.37191	1.41684	1.29278	3.11437	4.3978	3.60526	0.0143553	2.75275	0.85599	3.73985	5.08958	0.731183	0.687061	7.70977	2.88557	5.97613	5.56864	7.04952
ACH-001653	5.33414	0	7.41287	2.20789	2.79286	0	0.31034	5.23419	4.77241	3.98732	2.83996	3.08746	4.42761	2.65992	0.695994	0.0143553	4.16511	5.21994	3.77083	2.82171	4.48993	4.43496	4.61471	1.28096	0.443607	0.0976108	0	5.96555	4.38474	3.23879	0	6.3336	0.0285692	0.0840643	5.06695	3.0054	2.63459	1.23266	3.47768	5.72383	2.94298	4.95838	0.214125	0.879706	6.92267	1.5008	5.04264	2.40327	6.59783
ACH-000852	4.80529	0	5.91934	3.05832	4.97728	0.111031	0.516015	6.47962	7.66249	4.89093	3.34908	3.97545	5.65707	3.41007	2.22033	0.0285692	4.33271	5.65019	5.21529	4.03386	5.99299	6.49969	8.61897	1.12433	4.55766	0.31034	0.464668	4.60288	7.4733	4.22265	6.45615	6.0354	0.137504	0.124328	5.54936	3.88655	4.59276	2.25399	5.69766	4.82477	4.31976	5.7412	0.31034	0.0285692	7.75328	0.695994	5.5601	8.15325	8.31696
ACH-001862	4.30816	1.88362	6.99345	3.41143	3.42761	0.137504	2.25096	5.87036	5.08364	4.04439	2.72028	4.32769	4.53169	1.25096	6.25437	0	3.95047	4.76447	3.91169	2.18269	5.92196	5.53076	6.76168	1.79909	0.263034	0.757023	1.07039	6.49793	8.1114	4.65878	0	6.55136	0.0840643	2.43563	3.54102	0.495695	3.77294	2.30743	4.8334	6.5575	3.09592	5.15137	0.545968	0.0143553	6.7267	1.66903	6.44012	2.88166	7.52121
ACH-000661	3.82273	0	6.64717	2.73552	4.83188	0.0285692	1.81147	5.24793	4.09424	4.27798	3.52607	4.74362	4.97131	2.82171	1.15704	0.613532	5.27389	6.77307	5.20242	3.33342	6.65076	6.07596	9.54311	0.773996	0.0426443	0.226509	2.09424	6.84197	6.78306	4.27053	0.0840643	7.56316	2.09085	0.189034	3.29572	3.88362	4.28762	0.713696	4.43162	3.65306	3.74631	6.73985	1.25701	0.0143553	7.08321	3.41143	6.64847	7.29039	7.63662
ACH-001500	0.713696	0.0285692	7.04045	2.63227	3.41414	0.0143553	0.516015	5.83567	5.06566	4.05658	2.76553	3.33628	5.23534	1.0072	3.74201	0.0285692	4.6605	6.21276	4.95838	2.89724	4.22265	5.55059	7.96919	0	0.0426443	0.443607	0	3.70155	6.23898	3.61824	0.0703893	7.83485	0.214125	2.18269	1.38957	4.26078	3.63691	0.15056	5.41143	0.475085	4.27053	5.3726	0.594549	0.0285692	7.22217	3.10098	6.38819	3.26303	7.97482
ACH-001190	4.58015	0.0426443	6.92636	2.62059	4.60644	0.0285692	2.4489	5.95024	4.4019	4.01614	2.91073	3.9542	6.09782	3.68706	0.411426	0.389567	4.95466	5.30342	5.26228	3.62761	4.08576	6.43313	7.59954	0.250962	0.137504	0.137504	0.555816	4.82273	5.61589	4.42895	0.333424	7.76666	1.52607	2.55336	1.9222	3.45681	4.26228	1.23266	4.56742	4.27501	4.13175	6.35843	0.887525	0.678072	6.9735	2.44626	5.92458	7.47273	7.76295
ACH-002467	4.30889	0	6.29057	1.59455	3.63227	0	6.51885	6.99186	3.51223	3.66221	3.33628	4.91648	4.60288	0.321928	5.10894	0	4.73877	6.23764	4.69153	2.47768	4.83643	4.9905	7.34225	0.298658	0	0.214125	0	3.59574	6.47557	4.05918	0	6.81224	3.60407	1.16993	0.111031	3.95513	4.43696	0.0285692	4.61648	5.8296	3.1177	5.6907	0.536053	0	7.64796	3.26153	6.00405	6.61442	7.26172
ACH-000364	5.09845	0	6.5435	2.1177	4.1152	0.0143553	0.432959	5.68426	4.848	5.10852	2.18903	2.87381	6.18943	2.62527	5.24222	0.0976108	5.4545	5.57743	5.86146	4.44692	5.84071	5.24108	6.79377	0.0143553	0.137504	0.0285692	1.67356	5.8748	7.55873	3.9991	2.14405	7.24146	1.60407	4.51602	1.18903	4.6017	3.79909	0.454176	4.2817	3.42492	4.2854	6.92659	0.378512	2.73335	7.14415	1.5509	5.81532	6.23802	7.28762
ACH-000448	4.8334	0	7.25446	2.56316	4.03474	0.773996	2.02857	5.10769	4.40871	3.9364	1.66903	2.57773	5.12681	0.918386	3.24031	0.0840643	3.98732	5.10266	4.39163	2.61117	5.44128	5.0955	6.81826	1.70929	0.594549	0.0840643	0.545968	3.31179	7.06264	3.60763	0.0703893	6.15178	1.23266	2.30451	5.2555	3.26754	3.4019	1.49057	4.58436	6.37034	3.86592	5.40122	0.536053	1.82782	7.35271	0.584963	5.849	3.69153	7.63372
ACH-000932	3.13422	0	6.70791	2.06695	3.89821	0.0143553	6.85212	6.61941	3.66107	4.68986	0.0143553	1.81967	5.32661	3.40463	1.02857	0.0565835	3.79077	5.62469	5.1206	3.34341	5.77663	6.14241	7.75942	0	0.0143553	0.0565835	0.0285692	3.88069	5.70901	3.58135	0	6.78986	0.0426443	1.58976	0.124328	0.0976108	4.17393	2.31034	4.03474	0.111031	4.14649	6.37799	0.575312	0.0565835	7.04669	1.54102	6.15563	2.56803	7.53962
ACH-000783	2.23879	0	5.98641	3.38819	3.91456	0.0285692	0.0565835	4.78607	6.26021	5.98185	2.53107	3.59096	5.49985	3.43962	5.25927	0.137504	4.47054	5.67723	5.17991	2.73769	5.43363	5.99164	5.34483	0.0143553	0.0565835	0.0285692	0	4.28983	7.15563	3.79286	0.137504	5.63604	0.367371	0.333424	6.00921	5.93475	3.43296	0.0840643	1.63227	3.43829	3.29131	5.92125	2.21412	5.62877	8.79646	0.613532	6.64976	4.39232	7.38509
ACH-002044	8.39339	0	7.26407	2.32481	5.10224	0.0285692	0	4.97085	6.90038	4.08661	3.07895	3.15056	6.11728	3.30451	4.29646	0.678072	3.79909	6.85212	5.12805	2.51349	4.54226	6.24012	7.57024	0.250962	0.0703893	1.48027	0.111031	3.24945	7.44253	3.61941	3.36597	6.02857	0.505891	0	4.68986	5.68398	3.72137	0	4.6893	0.0285692	3.24489	4.69988	0.555816	0.713696	7.93198	0.176323	6.04111	3.69265	8.3349
ACH-000301	0.464668	0	5.90641	2.18903	3.21101	0.344828	5.81019	5.8622	5.48478	3.74093	2.36177	4.02059	4.54967	2.75275	0.632268	0.163499	2.81762	2.95047	4.06867	3.45418	4.69377	5.7926	6.66548	0.0840643	0.111031	0	0.0703893	4.7939	5.9798	3.49313	0.0426443	7.17971	0.0143553	0	4.48285	1.07039	3.6565	2.89724	6.42442	4.33771	3.05137	6.81493	1.43829	0.0285692	5.393	0.757023	5.86419	7.48261	7.45352
ACH-002459	3.51854	0	7.32921	2.59694	3.24641	0.0143553	6.83289	6.21859	3.3978	3.74201	1.58976	3.85	3.85798	0.956057	1.38405	0	4.26379	4.47054	4.37643	4.24413	5.05224	5.39575	7.81147	0	0.389567	0.214125	0.495695	3.24641	6.2765	3.70044	0.0565835	8.12314	0.485427	1.87578	1.38405	2.37016	3.69599	2.12433	4.64386	5.48188	3.5373	6.90629	0.495695	0.286881	6.58436	4.14975	5.76713	4.61883	6.58496
ACH-000976	5.31868	0	7.21296	1.37851	4.39438	0.0703893	1.10434	5.49985	3.77821	2.89336	2.86196	3.73335	4.3799	1.89142	0.201634	1.04963	4.8089	6.86814	3.36737	0.903038	5.31976	5.64674	6.81877	4.46074	0.124328	0.505891	0.111031	3.90304	6.70957	3.89918	0.0840643	7.75014	0.0285692	0.0840643	3.36036	2.07039	3.35614	1.73985	6.22497	5.79572	4.02237	3.47379	0.799087	2.08406	5.9397	0.0143553	5.52105	2.50335	6.88899
ACH-001516	5.70846	0	7.06674	2.01436	4.22342	0	0	4.78607	4.47573	3.58856	3.77716	5.64904	6.18547	3.30159	1.35614	0	4.61824	6.67384	4.89336	3.17313	5.8775	5.19417	0.298658	1.38405	5.84423	0.238787	0.0565835	3.8268	4.90497	3.90593	9.04579	6.69822	0.545968	2.76553	7.28142	5.40327	3.6837	0	4.95699	0.238787	3.63227	5.91073	4.07296	2.27501	8.35041	4.29278	6.0847	4.72465	7.66221
ACH-001354	4.17871	0	7.28225	3.16672	4.9855	0.0285692	0.0840643	0.0976108	4.69488	4.45483	0.863938	1.30451	4.77347	2.18269	0.933573	0	4.82018	5.56499	5.33414	2.51602	5.63575	5.76421	0.333424	0	0.0703893	2.22651	0.378512	3.9486	4.44228	3.93734	5.45154	6.54489	5.26866	0.0976108	5.86962	4.06005	3.47249	0	0.0565835	0.0703893	4.97085	4.81967	2.50843	2.90111	7.79487	4.67976	6.12226	4.88606	8.27664
ACH-001645	4.86987	0	6.38474	2.04614	3.37434	0.0426443	0.9855	6.59305	3.64962	3.67694	2.65764	4.4489	5.31832	0.0285692	0.214125	0.201634	3.57289	4.62	3.72028	2.8953	3.35614	4.90881	6.06523	0.286881	0	0.0143553	0	3.95884	6.33307	3.91839	0.0285692	7.26153	2.46728	2.35614	0.0426443	4.06264	3.98641	2.19849	3.83491	3.94953	4.8846	5.53419	0.432959	3.46336	5.39951	2.96901	5.85972	4.97131	8.81243
[truncated: 555 more rows]
[truncated: 206 more columns]
